# Supplementary material for: Characterization of the ABC methionine transporter from Neisseria meningitidis reveals that lipidated MetQ is required for interaction
Source: eLife. 2021 Aug 19;10:e69742. doi: 10.7554/eLife.69742 (PMC8416018; doi:10.7554/eLife.69742)
Supplement: Figure 3—source data 1. [file elife-69742-fig3-data1.xlsx]

## Sheet: Sheet1
The measured -ln(Icpmg/I1D) values. NLM-NmmetQ concetration was 43 uM, reporter molecule concentration was 2 mM and methionine analog concentration was 43 uM.
Methioninine analog	-ln(Icpmg/I1D)	Standard error of the mean
Reporter only (trifluoro methyl methioninine)	0.454712	0.0073935
Reporter + NLM-NmMetQ	2.29716	0.018674
N-formyl-L-methionine	0.481658	0.00926235
L-methionine	0.492037	0.0243344
Seleno-L-methionine	0.513265	0.00775412
N-acetyl-L-methionine	0.584694	0.0376281
L-norleucine	1.00011	0.0363145
L-ethionine	1.04069	0.0308851
L-methionine sulfoximine	1.27793	0.00230798
D-methionine	1.35629	0.0301126
L-methionine ethyl ester	1.75863	0.0167625
S-methyl-L-cysteine	2.06393	0.0169345
L-homocysteine	2.13232	0.0412936
L-methioninol	2.20866	0.00687675
N-acetyl-D-methionine	2.25927	0.0249379
L-cysteine	2.28079	0.0312609
L-ornithine	2.30902	0.0158081
