# Supplementary material for: Characterization of the ABC methionine transporter from Neisseria meningitidis reveals that lipidated MetQ is required for interaction
Source: eLife. 2021 Aug 19;10:e69742. doi: 10.7554/eLife.69742 (PMC8416018; doi:10.7554/eLife.69742)
Supplement: Figure 5—source data 1. [file elife-69742-fig5-data1.xlsx]

## Sheet: Sheet1
Distribution of lipid-modified MetQ proteins in different classes of Proteobacteria
Description	Superkingdom	Phylum	Class	Order	Family	Genus	Species	Uniprot shared name	Organism	Sequence Length	Taxonomy_ID	Lipoprotein?
Lipoprotein YaeC	Bacteria	Proteobacteria	Alphaproteobacteria	Rhizobiales	Xanthobacteraceae	Azorhizobium	Azorhizobium caulinodans ORS 571	A8IN21	Azorhizobium caulinodans (strain ATCC 43989 / DSM 5975 / JCM 20966 / NBRC14845 / NCIMB 13405 / ORS 571)	264	438753
Lipoprotein	Bacteria	Proteobacteria	Alphaproteobacteria	Rhizobiales	Xanthobacteraceae	Azorhizobium	Azorhizobium caulinodans ORS 571	A8IC84	Azorhizobium caulinodans (strain ATCC 43989 / DSM 5975 / JCM 20966 / NBRC14845 / NCIMB 13405 / ORS 571)	296	438753
YaeC lipoprotein	Bacteria	Proteobacteria	Alphaproteobacteria	Rhizobiales	Xanthobacteraceae	Azorhizobium	Azorhizobium caulinodans ORS 571	A8HUG0	Azorhizobium caulinodans (strain ATCC 43989 / DSM 5975 / JCM 20966 / NBRC14845 / NCIMB 13405 / ORS 571)	261	438753
Lipoprotein| YaeC family	Bacteria	Proteobacteria	Alphaproteobacteria	Rhizobiales	Xanthobacteraceae	Xanthobacter	Xanthobacter autotrophicus Py2	A7IEE9	Xanthobacter autotrophicus (strain ATCC BAA-1158 / Py2)	262	78245
Lipoprotein	Bacteria	Proteobacteria	Alphaproteobacteria	Rhizobiales	Xanthobacteraceae	Xanthobacter	Xanthobacter autotrophicus Py2	A7IED3	Xanthobacter autotrophicus (strain ATCC BAA-1158 / Py2)	281	78245
D-methionine-binding lipoprotein MetQ	Bacteria	Proteobacteria	Alphaproteobacteria	Rhizobiales	Xanthobacteraceae	Starkeya	Starkeya sp. HF14-78462	A0A5S9PAM7	Starkeya sp. HF14-78462.	267	2666134
D-methionine-binding lipoprotein MetQ	Bacteria	Proteobacteria	Alphaproteobacteria	Rhizobiales	Xanthobacteraceae	Starkeya	Starkeya sp. HF14-78462	A0A5S9PA26	Starkeya sp. HF14-78462.	275	2666134
Lipoprotein	Bacteria	Proteobacteria	Alphaproteobacteria	Rhizobiales	Xanthobacteraceae	Labrys	Labrys neptuniae	A0A5C1WKL7	Labrys neptuniae.	270	376174
Lipoprotein	Bacteria	Proteobacteria	Alphaproteobacteria	Rhizobiales	Xanthobacteraceae	Labrys	Labrys neptuniae	A0A5C1WIV0	Labrys neptuniae.	267	376174
Lipoprotein	Bacteria	Proteobacteria	Alphaproteobacteria	Rhizobiales	Xanthobacteraceae	Labrys	Labrys neptuniae	A0A5C1W871	Labrys neptuniae.	272	376174
MetQ/NlpA family ABC transporter substrate-binding protein	Bacteria	Proteobacteria	Alphaproteobacteria	Rhizobiales	Xanthobacteraceae	Starkeya	Starkeya sp. 3C	A0A556P744	Starkeya sp. 3C.	259	2597768
Lipoprotein	Bacteria	Proteobacteria	Alphaproteobacteria	Rhizobiales	Xanthobacteraceae	Ancylobacter	Ancylobacter aquaticus	A0A4R1HCJ1	Ancylobacter aquaticus.	266	100
Lipoprotein	Bacteria	Proteobacteria	Alphaproteobacteria	Rhizobiales	Xanthobacteraceae	Pseudolabrys	Pseudolabrys sp. GY_H	A0A371B137	Pseudolabrys sp. GY_H.	265	2292256
Metal ABC transporter substrate-binding protein	Bacteria	Proteobacteria	Alphaproteobacteria	Rhizobiales	Xanthobacteraceae	Starkeya	Starkeya novella	A0A2W5QTR9	Starkeya novella	259	921
Lipoprotein	Bacteria	Proteobacteria	Alphaproteobacteria	Rhizobiales	Xanthobacteraceae	Starkeya	Starkeya novella	A0A2W5QTG1	Starkeya novella	266	921
Metal ABC transporter substrate-binding protein	Bacteria	Proteobacteria	Alphaproteobacteria	Rhizobiales	Xanthobacteraceae	Starkeya	Starkeya novella	A0A2W5K4G3	Starkeya novella	255	921
Uncharacterized protein	Bacteria	Proteobacteria	Alphaproteobacteria	Rhizobiales	Xanthobacteraceae	Pseudolabrys	Pseudolabrys sp. Root1462	A0A0Q7U0S1	Pseudolabrys sp. Root1462.	259	1736466
Methionine ABC transporter substrate-binding protein	Bacteria	Proteobacteria	Alphaproteobacteria	Sphingomonadales	Sphingomonadaceae	Novosphingobium	Novosphingobium lindaniclasticum LE124	T0IJS8	Novosphingobium lindaniclasticum LE124.	261	1096930	y
ABC transporter substrate-binding protein	Bacteria	Proteobacteria	Alphaproteobacteria	Sphingomonadales	Sphingomonadaceae	Sphingomonas	Sphingomonas ginsenosidivorax	A0A5C6UC37	Sphingomonas ginsenosidivorax.	264	862135	y
Lipoprotein	Bacteria	Proteobacteria	Alphaproteobacteria	Sphingomonadales	Sphingomonadaceae	Novosphingobium	Novosphingobium barchaimii	A0A561HSK8	Novosphingobium barchaimii.	265	1420591	y
Lipoprotein	Bacteria	Proteobacteria	Alphaproteobacteria	Sphingomonadales	Sphingomonadaceae	Sphingomonas	Sphingomonas sp. BK235	A0A4R2PHI0	Sphingomonas sp. BK235.	269	2512131	y
Lipoprotein	Bacteria	Proteobacteria	Alphaproteobacteria	Sphingomonadales	Sphingomonadaceae	Sphingosinicella	Sphingosinicella sp. BN140058	A0A4P6FPU2	Sphingosinicella sp. BN140058.	266	1892855	y
MetQ/NlpA family ABC transporter substrate-binding protein	Bacteria	Proteobacteria	Alphaproteobacteria	Sphingomonadales	Sphingomonadaceae	Sphingomonas	Sphingomonas sp. CCP-7	A0A437MAR2	Sphingomonas sp. CCP-7.	264	1979270	y
MetQ/NlpA family ABC transporter substrate-binding protein	Bacteria	Proteobacteria	Alphaproteobacteria	Sphingomonadales	Sphingomonadaceae	Sphingomonas	Sphingomonas sp. K2R01-6	A0A418W7J6	Sphingomonas sp. K2R01-6.	264	2320861	y
Lipoprotein	Bacteria	Proteobacteria	Alphaproteobacteria	Sphingomonadales	Sphingomonadaceae	Sphingobium	Sphingobium sp. YG1	A0A2Z6ADW5	Sphingobium sp. YG1.	265	2082188	y
Lipoprotein	Bacteria	Proteobacteria	Alphaproteobacteria	Sphingomonadales	Sphingomonadaceae	Sphingobium	Sphingobium sp.	A0A2W6SSF8	Sphingobium sp.	267	1912891	y
Lipoprotein	Bacteria	Proteobacteria	Alphaproteobacteria	Sphingomonadales	Sphingomonadaceae	Novosphingobium	Novosphingobium pentaromativorans	A0A2W5NSD9	Novosphingobium pentaromativorans.	265	205844	y
Uncharacterized protein	Bacteria	Proteobacteria	Alphaproteobacteria	Sphingomonadales	Sphingomonadaceae	Sphingomonas	Sphingomonas hengshuiensis	A0A2W5DLV6	Sphingomonas hengshuiensis.	314	1609977	y
Lipoprotein	Bacteria	Proteobacteria	Alphaproteobacteria	Sphingomonadales	Sphingomonadaceae	Sphingomonas	Sphingomonas oleivorans	A0A2T5FYH5	Sphingomonas oleivorans.	267	1735121	y
Lipoprotein	Bacteria	Proteobacteria	Alphaproteobacteria	Sphingomonadales	Sphingomonadaceae	Sphingosinicella	Sphingosinicella sp. GL-C-18	A0A2P7QEQ5	Sphingosinicella sp. GL-C-18.	266	2116704	y
Membrane lipoprotein TpN32	Bacteria	Proteobacteria	Alphaproteobacteria	Sphingomonadales	Sphingomonadaceae	Sphingomonas	Sphingomonas haloaromaticamans	A0A1S1HB10	Sphingomonas haloaromaticamans.	264	653954	y
Lipoprotein	Bacteria	Proteobacteria	Alphaproteobacteria	Sphingomonadales	Sphingomonadaceae	Sphingomonas	Sphingomonas sp. 67-41	A0A1Q4DZ39	Sphingomonas sp. 67-41.	265	1895850	y
D-methionine transport system substrate-binding protein	Bacteria	Proteobacteria	Alphaproteobacteria	Sphingomonadales	Sphingomonadaceae	Sphingomonas	Sphingomonas sp. NFR15	A0A1G5SVT6	Sphingomonas sp. NFR15.	263	1566282	y
Lipoprotein	Bacteria	Proteobacteria	Alphaproteobacteria	Sphingomonadales	Sphingomonadaceae	Sphingomonas	Sphingomonas sp. TDK1	A0A196N886	Sphingomonas sp. TDK1.	265	453247	y
Lipoprotein	Bacteria	Proteobacteria	Alphaproteobacteria	Sphingomonadales	Sphingomonadaceae	Novosphingobium	Novosphingobium sp. FSW06-99	A0A102DB45	Novosphingobium sp. FSW06-99.	265	1739113	y
Lipoprotein	Bacteria	Proteobacteria	Alphaproteobacteria	Sphingomonadales	Sphingomonadaceae	Sphingomonas	Sphingomonas sp. Leaf339	A0A0Q6L2V6	Sphingomonas sp. Leaf339.	266	1736343	y
Lipoprotein	Bacteria	Proteobacteria	Alphaproteobacteria	Sphingomonadales	Sphingomonadaceae	Sphingomonas	Sphingomonas sp. Leaf343	A0A0Q5PPH7	Sphingomonas sp. Leaf343.	265	1736345	y
Methionine ABC transporter substrate-binding protein	Bacteria	Proteobacteria	Alphaproteobacteria	Sphingomonadales	Sphingomonadaceae	Sphingomonas	Sphingomonas sp. Leaf34	A0A0Q4L7P7	Sphingomonas sp. Leaf34.	264	1736216	y
Lipoprotein	Bacteria	Proteobacteria	Alphaproteobacteria	Sphingomonadales	Sphingomonadaceae	Novosphingobium	Novosphingobium sp. ST904	A0A0N0LVX7	Novosphingobium sp. ST904.	265	1684385	y
Lipoprotein	Bacteria	Proteobacteria	Alphaproteobacteria	Sphingomonadales	Sphingomonadaceae	Sphingomonas	Sphingomonas taxi	A0A097EJM5	Sphingomonas taxi.	273	1549858	y
MetQ/NlpA family ABC transporter substrate-binding protein	Bacteria	Proteobacteria	Alphaproteobacteria	Rhizobiales	Salinarimonadaceae	Salinarimonas	Salinarimonas sp. BN140002	A0A5B2V5W8	Salinarimonas sp. BN140002.	261	1638099
Lipoprotein	Bacteria	Proteobacteria	Alphaproteobacteria	Rhodospirillales	Rhodospirillaceae	Skermanella	Skermanella stibiiresistens SB22	W9H8Y9	Skermanella stibiiresistens SB22.	269	1385369
Lipoprotein	Bacteria	Proteobacteria	Alphaproteobacteria	Rhodospirillales	Rhodospirillaceae	Skermanella	Skermanella stibiiresistens SB22	W9H2C6	Skermanella stibiiresistens SB22.	267	1385369
NLPA lipoprotein	Bacteria	Proteobacteria	Alphaproteobacteria	Rhodospirillales	Rhodospirillaceae	Phaeospirillum	Phaeospirillum fulvum MGU-K5	S9TM99	Phaeospirillum fulvum MGU-K5.	261	1316936
Lipoprotein	Bacteria	Proteobacteria	Alphaproteobacteria	Rhodospirillales	Rhodospirillaceae	Phaeospirillum	Phaeospirillum fulvum MGU-K5	S9TIB0	Phaeospirillum fulvum MGU-K5.	269	1316936
Lipoprotein	Bacteria	Proteobacteria	Alphaproteobacteria	Rhodospirillales	Rhodospirillaceae	Rhodospirillum	Rhodospirillum rubrum ATCC 11170	Q2RWB3	Rhodospirillum rubrum (strain ATCC 11170 / ATH 1.1.1 / DSM 467 / LMG 4362 /NCIB 8255 / S1)	268	269796
NLPA lipoprotein	Bacteria	Proteobacteria	Alphaproteobacteria	Rhodospirillales	Rhodospirillaceae	Rhodospirillum	Rhodospirillum rubrum ATCC 11170	Q2RWA0	Rhodospirillum rubrum (strain ATCC 11170 / ATH 1.1.1 / DSM 467 / LMG 4362 /NCIB 8255 / S1)	262	269796
Lipoprotein YaeC	Bacteria	Proteobacteria	Alphaproteobacteria	Rhodospirillales	Rhodospirillaceae	Rhodospirillum	Rhodospirillum rubrum ATCC 11170	Q2RRM8	Rhodospirillum rubrum (strain ATCC 11170 / ATH 1.1.1 / DSM 467 / LMG 4362 /NCIB 8255 / S1)	262	269796
Lipoprotein	Bacteria	Proteobacteria	Alphaproteobacteria	Rhodospirillales	Rhodospirillaceae	Caenispirillum	Caenispirillum salinarum AK4	K9HD20	Caenispirillum salinarum AK4.	270	1238182
Methionine ABC transporter| periplasmic-binding component	Bacteria	Proteobacteria	Alphaproteobacteria	Rhodospirillales	Rhodospirillaceae	Oceanibaculum	Oceanibaculum indicum P24	K2JTR4	Oceanibaculum indicum P24.	262	1207063
Lipoprotein	Bacteria	Proteobacteria	Alphaproteobacteria	Rhodospirillales	Rhodospirillaceae	Tistrella	Tistrella mobilis KA081020-065	I3TRE4	Tistrella mobilis (strain KA081020-065)	281	1110502
Lipoprotein| YaeC family	Bacteria	Proteobacteria	Alphaproteobacteria	Rhodospirillales	Rhodospirillaceae	Tistrella	Tistrella mobilis KA081020-065	I3TJB6	Tistrella mobilis (strain KA081020-065)	262	1110502
D-methionine ABC transporter protein| periplasmic binding protein	Bacteria	Proteobacteria	Alphaproteobacteria	Rhodospirillales	Rhodospirillaceae	Phaeospirillum	Phaeospirillum molischianum DSM 120	H8FU31	Phaeospirillum molischianum DSM 120.	261	1150626
Lipoprotein	Bacteria	Proteobacteria	Alphaproteobacteria	Rhodospirillales	Rhodospirillaceae	Phaeospirillum	Phaeospirillum molischianum DSM 120	H8FPE3	Phaeospirillum molischianum DSM 120.	269	1150626
NLPA lipoprotein	Bacteria	Proteobacteria	Alphaproteobacteria	Rhodospirillales	Rhodospirillaceae	Pararhodospirillum	Pararhodospirillum photometricum DSM 122	H6SPS9	Pararhodospirillum photometricum DSM 122.	260	1150469
Lipoprotein	Bacteria	Proteobacteria	Alphaproteobacteria	Rhodospirillales	Rhodospirillaceae	Pararhodospirillum	Pararhodospirillum photometricum DSM 122	H6SLI0	Pararhodospirillum photometricum DSM 122.	284	1150469
D-methionine ABC transporter protein|periplasmic binding protein	Bacteria	Proteobacteria	Alphaproteobacteria	Rhodospirillales	Rhodospirillaceae	Azospirillum	Azospirillum brasilense Sp245	G8AVY9	Azospirillum brasilense Sp245.	259	1064539
Lipoprotein	Bacteria	Proteobacteria	Alphaproteobacteria	Rhodospirillales	Rhodospirillaceae	Azospirillum	Azospirillum brasilense Sp245	G8ATF2	Azospirillum brasilense Sp245.	266	1064539
D-methionine transport system substrate-binding protein	Bacteria	Proteobacteria	Alphaproteobacteria	Rhodospirillales	Rhodospirillaceae	Azospirillum	Azospirillum sp. B510	D3P6A4	Azospirillum sp. (strain B510)	263	137722
Lipoprotein	Bacteria	Proteobacteria	Alphaproteobacteria	Rhodospirillales	Rhodospirillaceae	Azospirillum	Azospirillum sp. B510	D3P6A1	Azospirillum sp. (strain B510)	266	137722
Lipoprotein	Bacteria	Proteobacteria	Alphaproteobacteria	Rhodospirillales	Rhodospirillaceae	Azospirillum	Azospirillum sp. B510	D3NZ19	Azospirillum sp. (strain B510)	275	137722
Lipoprotein	Bacteria	Proteobacteria	Alphaproteobacteria	Rhodospirillales	Rhodospirillaceae	Rhodospirillum	Rhodospirillum centenum SW	B6IWN8	Rhodospirillum centenum (strain ATCC 51521 / SW)	272	414684
Lipoprotein	Bacteria	Proteobacteria	Alphaproteobacteria	Rhodospirillales	Rhodospirillaceae	Hypericibacter	Hypericibacter adhaerens	A0A5J6N1Y6	Rhodospirillaceae bacterium R5959.	272	2602016
MetQ/NlpA family ABC transporter substrate-binding protein	Bacteria	Proteobacteria	Alphaproteobacteria	Rhodospirillales	Rhodospirillaceae	Ferrovibrio	Ferrovibrio terrae	A0A516GYI0	Ferrovibrio sp. K5.	263	2594003
Lipoprotein	Bacteria	Proteobacteria	Alphaproteobacteria	Rhodospirillales	Rhodospirillaceae	Pararhodospirillum	Pararhodospirillum oryzae	A0A512H491	Pararhodospirillum oryzae.	281	478448
Lipoprotein	Bacteria	Proteobacteria	Alphaproteobacteria	Rhodospirillales	Rhodospirillaceae	Pararhodospirillum	Pararhodospirillum oryzae	A0A512H3W7	Pararhodospirillum oryzae.	300	478448
Lipoprotein	Bacteria	Proteobacteria	Alphaproteobacteria	Rhodospirillales	Rhodospirillaceae	Skermanella	Skermanella aerolata	A0A512DT45	Skermanella aerolata.	269	393310
MetQ/NlpA family ABC transporter substrate-binding protein	Bacteria	Proteobacteria	Alphaproteobacteria	Rhodospirillales	Rhodospirillaceae	Azospirillum	Azospirillum doebereinerae	A0A3S0V1F0	Azospirillum doebereinerae.	260	92933
Lipoprotein	Bacteria	Proteobacteria	Alphaproteobacteria	Rhodospirillales	Rhodospirillaceae	Azospirillum	Azospirillum sp. L-25-5w-1	A0A3S0K8G6	Azospirillum sp. L-25-5w-1.	267	2496639
MetQ/NlpA family ABC transporter substrate-binding protein	Bacteria	Proteobacteria	Alphaproteobacteria	Rhodospirillales	Rhodospirillaceae	Azospirillum	Azospirillum sp. L-25-5w-1	A0A3S0HXQ1	Azospirillum sp. L-25-5w-1.	261	2496639
Lipoprotein	Bacteria	Proteobacteria	Alphaproteobacteria	Rhodospirillales	Rhodospirillaceae	Thalassospira	Thalassospira profundimaris	A0A367VDI5	Thalassospira profundimaris.	266	502049
Lipoprotein	Bacteria	Proteobacteria	Alphaproteobacteria	Rhodospirillales	Rhodospirillaceae	Thalassospira	Thalassospira lucentensis MCCC 1A00383 = DSM 14000	A0A367V7M8	Thalassospira lucentensis MCCC 1A00383 = DSM 14000.	266	1123365
Methionine ABC transporter substrate-binding protein	Bacteria	Proteobacteria	Alphaproteobacteria	Rhodospirillales	Rhodospirillaceae	Magnetospirillum	Magnetospirillum kuznetsovii	A0A364NTZ7	Magnetospirillum kuznetsovii.	260	2053833
Lipoprotein	Bacteria	Proteobacteria	Alphaproteobacteria	Rhodospirillales	Rhodospirillaceae	Azospirillum	Azospirillum sp. TSH64	A0A2U1XN89	Azospirillum sp. TSH64.	275	652740
Lipoprotein	Bacteria	Proteobacteria	Alphaproteobacteria	Rhodospirillales	Rhodospirillaceae	Azospirillum	Azospirillum sp. TSO22-1	A0A2U1W2A5	Azospirillum sp. TSO22-1.	267	716789
Lipoprotein	Bacteria	Proteobacteria	Alphaproteobacteria	Rhodospirillales	Rhodospirillaceae	Azospirillum	Azospirillum sp. TSO22-1	A0A2U1W287	Azospirillum sp. TSO22-1.	272	716789
Dioxygenase	Bacteria	Proteobacteria	Alphaproteobacteria	Rhodospirillales	Rhodospirillaceae	Azospirillum	Azospirillum sp. TSO22-1	A0A2U1W0B9	Azospirillum sp. TSO22-1.	261	716789
Methionine ABC transporter substrate-binding protein	Bacteria	Proteobacteria	Alphaproteobacteria	Rhodospirillales	Rhodospirillaceae	Azospirillum	Azospirillum sp. TSO22-1	A0A2U1W005	Azospirillum sp. TSO22-1.	257	716789
Metal ABC transporter substrate-binding protein	Bacteria	Proteobacteria	Alphaproteobacteria	Rhodospirillales	Rhodospirillaceae	Azospirillum	Azospirillum sp. CFH 70021	A0A2S2CVY3	Azospirillum sp. CFH 70021.	263	2202148
Lipoprotein	Bacteria	Proteobacteria	Alphaproteobacteria	Rhodospirillales	Rhodospirillaceae	Azospirillum	Azospirillum sp. CFH 70021	A0A2S2CVX4	Azospirillum sp. CFH 70021.	265	2202148
Metal ABC transporter substrate-binding protein	Bacteria	Proteobacteria	Alphaproteobacteria	Rhodospirillales	Rhodospirillaceae	Telmatospirillum	Telmatospirillum siberiense	A0A2N3PYK8	Telmatospirillum siberiense.	263	382514
Metal ABC transporter substrate-binding protein	Bacteria	Proteobacteria	Alphaproteobacteria	Rhodospirillales	Rhodospirillaceae	Telmatospirillum	Telmatospirillum siberiense	A0A2N3PXC0	Telmatospirillum siberiense.	263	382514
Lipoprotein	Bacteria	Proteobacteria	Alphaproteobacteria	Rhodospirillales	Rhodospirillaceae	Telmatospirillum	Telmatospirillum siberiense	A0A2N3PSH6	Telmatospirillum siberiense.	271	382514
Lipoprotein	Bacteria	Proteobacteria	Alphaproteobacteria	Rhodospirillales	Rhodospirillaceae	Telmatospirillum	Telmatospirillum siberiense	A0A2N3PQK5	Telmatospirillum siberiense.	268	382514
Metal ABC transporter substrate-binding protein	Bacteria	Proteobacteria	Alphaproteobacteria	Rhodospirillales	Rhodospirillaceae	Ferrovibrio	Ferrovibrio sp.	A0A2M8U4K6	Ferrovibrio sp.	263	1917215
D-methionine transport system substrate-binding protein	Bacteria	Proteobacteria	Alphaproteobacteria	Rhodospirillales	Rhodospirillaceae	Caenispirillum	Caenispirillum bisanense	A0A286GKM6	Caenispirillum bisanense.	264	414052
Lipoprotein	Bacteria	Proteobacteria	Alphaproteobacteria	Rhodospirillales	Rhodospirillaceae	Caenispirillum	Caenispirillum bisanense	A0A286G4N0	Caenispirillum bisanense.	268	414052
Lipoprotein	Bacteria	Proteobacteria	Alphaproteobacteria	Rhodospirillales	Rhodospirillaceae	Caenispirillum	Caenispirillum bisanense	A0A286G2U1	Caenispirillum bisanense.	268	414052
Metal ABC transporter substrate-binding protein	Bacteria	Proteobacteria	Alphaproteobacteria	Rhodospirillales	Rhodospirillaceae	Elstera	Elstera cyanobacteriorum	A0A255XKP5	Elstera cyanobacteriorum.	264	2022747
Lipoprotein	Bacteria	Proteobacteria	Alphaproteobacteria	Rhodospirillales	Rhodospirillaceae	Azospirillum	Azospirillum sp. RU38E	A0A239L1I2	Azospirillum sp. RU38E.	271	1907313
D-methionine transport system substrate-binding protein	Bacteria	Proteobacteria	Alphaproteobacteria	Rhodospirillales	Rhodospirillaceae	Azospirillum	Azospirillum sp. RU38E	A0A239HJI3	Azospirillum sp. RU38E.	257	1907313
Metal ABC transporter substrate-binding protein	Bacteria	Proteobacteria	Alphaproteobacteria	Rhodospirillales	Rhodospirillaceae	Inquilinus	Inquilinus limosus	A0A211Z0P1	Inquilinus limosus.	262	171674
D-methionine transport system substrate-binding protein	Bacteria	Proteobacteria	Alphaproteobacteria	Rhodospirillales	Rhodospirillaceae	Azospirillum	Azospirillum lipoferum	A0A1X7NAA0	Azospirillum lipoferum.	260	193
Lipoprotein	Bacteria	Proteobacteria	Alphaproteobacteria	Rhodospirillales	Rhodospirillaceae	Azospirillum	Azospirillum lipoferum	A0A1X7N947	Azospirillum lipoferum.	265	193
Dioxygenase	Bacteria	Proteobacteria	Alphaproteobacteria	Rhodospirillales	Rhodospirillaceae	Thalassospira	Thalassospira sp. TSL5-1	A0A1Q4UUY8	Thalassospira sp. TSL5-1.	262	1544451
D-methionine transport system substrate-binding protein	Bacteria	Proteobacteria	Alphaproteobacteria	Rhodospirillales	Rhodospirillaceae	Insolitispirillum	Insolitispirillum peregrinum	A0A1N7L1M1	Insolitispirillum peregrinum.	260	80876
D-methionine transport system substrate-binding protein	Bacteria	Proteobacteria	Alphaproteobacteria	Rhodospirillales	Rhodospirillaceae	Insolitispirillum	Insolitispirillum peregrinum	A0A1N7L1J4	Insolitispirillum peregrinum.	261	80876
Lipoprotein	Bacteria	Proteobacteria	Alphaproteobacteria	Rhodospirillales	Rhodospirillaceae	Phaeospirillum	Phaeospirillum fulvum	A0A1H6ISS2	Phaeospirillum fulvum	268	1082
D-methionine transport system substrate-binding protein	Bacteria	Proteobacteria	Alphaproteobacteria	Rhodospirillales	Rhodospirillaceae	Phaeospirillum	Phaeospirillum fulvum	A0A1H6HF85	Phaeospirillum fulvum	261	1082
Lipoprotein	Bacteria	Proteobacteria	Alphaproteobacteria	Rhodospirillales	Rhodospirillaceae	Tistrella	Tistrella mobilis	A0A162KFM5	Tistrella mobilis.	266	171437
Lipoprotein	Bacteria	Proteobacteria	Alphaproteobacteria	Rhodospirillales	Rhodospirillaceae	Oceanibaculum	Oceanibaculum pacificum	A0A154W188	Oceanibaculum pacificum.	265	580166
Metal ABC transporter substrate-binding protein	Bacteria	Proteobacteria	Alphaproteobacteria	Rhodospirillales	Rhodospirillaceae	Haematospirillum	Haematospirillum jordaniae	A0A143DE93	Haematospirillum jordaniae.	261	1549855
Dioxygenase	Bacteria	Proteobacteria	Alphaproteobacteria	Rhodospirillales	Rhodospirillaceae	Elstera	Elstera litoralis	A0A0F3IUA4	Elstera litoralis.	264	552518
Lipoprotein	Bacteria	Proteobacteria	Alphaproteobacteria	Rhodospirillales	Rhodospirillaceae	Inquilinus	Inquilinus limosus MP06	A0A0A0D6H6	Inquilinus limosus MP06.	272	1398085
Lipoprotein	Bacteria	Proteobacteria	Alphaproteobacteria	Rhodospirillales	Rhodospirillaceae	Inquilinus	Inquilinus limosus MP06	A0A0A0D0C5	Inquilinus limosus MP06.	268	1398085
Uncharacterized protein	Bacteria	Proteobacteria	Alphaproteobacteria	Rhodospirillales	Rhodospirillaceae	Inquilinus	Inquilinus limosus MP06	A0A0A0CZ02	Inquilinus limosus MP06.	257	1398085
D-methionine transport system substrate-binding protein	Bacteria	Proteobacteria	Alphaproteobacteria	Rhodospirillales	Rhodospirillaceae	Azospirillum	Azospirillum brasilense	A0A060DR22	Azospirillum brasilense.	259	192
D-methionine transport system substrate-binding protein	Bacteria	Proteobacteria	Alphaproteobacteria	Rhizobiales	Rhodobiaceae	Afifella	Afifella marina DSM 2698	A0A1G5P4H1	Afifella marina DSM 2698.	260	1120955
DL-methionine transporter| substrate-binding subunit	Bacteria	Proteobacteria	Alphaproteobacteria	Rhodobacterales	Rhodobacteraceae	Paracoccus	Paracoccus aminophilus JCM 7686	S5Y9M1	Paracoccus aminophilus JCM 7686.	260	1367847
YaeC family lipoprotein	Bacteria	Proteobacteria	Alphaproteobacteria	Rhodobacterales	Rhodobacteraceae	Celeribacter	Celeribacter baekdonensis B30	K2JA23	Celeribacter baekdonensis B30.	258	1208323
Lipoprotein	Bacteria	Proteobacteria	Alphaproteobacteria	Rhodobacterales	Rhodobacteraceae	Ketogulonicigenium	Ketogulonicigenium vulgare WSH-001	F9Y6G4	Ketogulonicigenium vulgare (strain WSH-001)	266	759362
D-methionine binding lipoprotein| ABC-type metal ion transport system	Bacteria	Proteobacteria	Alphaproteobacteria	Rhodobacterales	Rhodobacteraceae	Ketogulonicigenium	Ketogulonicigenium vulgare WSH-001	F9Y3Y5	Ketogulonicigenium vulgare (strain WSH-001)	270	759362
D-methionine binding lipoprotein| ABC-type metal ion transport system	Bacteria	Proteobacteria	Alphaproteobacteria	Rhodobacterales	Rhodobacteraceae	Ketogulonicigenium	Ketogulonicigenium vulgare WSH-001	F9Y3F7	Ketogulonicigenium vulgare (strain WSH-001)	274	759362
ABC D-methionine uptake transporter| substrate-binding protein	Bacteria	Proteobacteria	Alphaproteobacteria	Rhodobacterales	Rhodobacteraceae	Sulfitobacter	Sulfitobacter indolifex HEL-45	A9E4M7	Sulfitobacter indolifex HEL-45.	258	391624
Uncharacterized protein	Bacteria	Proteobacteria	Alphaproteobacteria	Rhodobacterales	Rhodobacteraceae	Rhodobacter	Rhodobacter sphaeroides ATCC 17025	A4X0L4	Rhodobacter sphaeroides (strain ATCC 17025 / ATH 2.4.3)	258	349102
NLPA lipoprotein	Bacteria	Proteobacteria	Alphaproteobacteria	Rhodobacterales	Rhodobacteraceae	Rhodobacter	Rhodobacter sphaeroides ATCC 17025	A4WQM8	Rhodobacter sphaeroides (strain ATCC 17025 / ATH 2.4.3)	264	349102
Lipoprotein| YaeC family	Bacteria	Proteobacteria	Alphaproteobacteria	Rhodobacterales	Rhodobacteraceae	Rhodobacter	Rhodobacter sphaeroides ATCC 17025	A4WQM5	Rhodobacter sphaeroides (strain ATCC 17025 / ATH 2.4.3)	263	349102
Lipoprotein| YaeC family	Bacteria	Proteobacteria	Alphaproteobacteria	Rhodobacterales	Rhodobacteraceae	Paracoccus	Paracoccus denitrificans PD1222	A1BA28	Paracoccus denitrificans (strain Pd 1222)	264	318586
MetQ/NlpA family ABC transporter substrate-binding protein	Bacteria	Proteobacteria	Alphaproteobacteria	Rhodobacterales	Rhodobacteraceae	Paracoccus	Paracoccus kondratievae	A0A5P8JK97	Paracoccus kondratievae.	266	135740
MetQ/NlpA family ABC transporter substrate-binding protein	Bacteria	Proteobacteria	Alphaproteobacteria	Rhodobacterales	Rhodobacteraceae	Paracoccus	Paracoccus kondratievae	A0A5P8JJG8	Paracoccus kondratievae.	273	135740
D-methionine-binding lipoprotein MetQ	Bacteria	Proteobacteria	Alphaproteobacteria	Rhodobacterales	Rhodobacteraceae	unclassified Rhodobacteraceae	Rhodobacteraceae bacterium	A0A5P2ZSE1	Rhodobacteraceae bacterium.	257	1904441
MetQ/NlpA family ABC transporter substrate-binding protein	Bacteria	Proteobacteria	Alphaproteobacteria	Rhodobacterales	Rhodobacteraceae	Litoreibacter	Litoreibacter sp. LN3S51	A0A5B8IYN2	Litoreibacter sp. LN3S51.	258	2599296
MetQ/NlpA family ABC transporter substrate-binding protein	Bacteria	Proteobacteria	Alphaproteobacteria	Rhodobacterales	Rhodobacteraceae	Paraoceanicella	Paraoceanicella profunda	A0A5B8G6B6	Paraoceanicella profunda.	260	2579971
D-methionine transport system substrate-binding protein	Bacteria	Proteobacteria	Alphaproteobacteria	Rhodobacterales	Rhodobacteraceae	Paracoccus	Paracoccus sulfuroxidans	A0A562NHA4	Paracoccus sulfuroxidans.	260	384678
MetQ/NlpA family ABC transporter substrate-binding protein	Bacteria	Proteobacteria	Alphaproteobacteria	Rhodobacterales	Rhodobacteraceae	unclassified Rhodobacteraceae	Rhodobacteraceae bacterium	A0A545B8T1	Rhodobacteraceae bacterium.	258	1904441
MetQ/NlpA family ABC transporter substrate-binding protein	Bacteria	Proteobacteria	Alphaproteobacteria	Rhodobacterales	Rhodobacteraceae	Paracoccus	Paracoccus denitrificans	A0A533I875	Paracoccus denitrificans.	258	266
D-methionine transport system substrate-binding protein	Bacteria	Proteobacteria	Alphaproteobacteria	Rhodobacterales	Rhodobacteraceae	Paracoccus	Paracoccus laeviglucosivorans	A0A521CW79	Paracoccus laeviglucosivorans.	260	1197861
MetQ/NlpA family ABC transporter substrate-binding protein	Bacteria	Proteobacteria	Alphaproteobacteria	Rhodobacterales	Rhodobacteraceae	Paracoccus	Paracoccus sp. 3058	A0A4Z1BR30	Paracoccus sp. 3058.	262	2561921
MetQ/NlpA family ABC transporter substrate-binding protein	Bacteria	Proteobacteria	Alphaproteobacteria	Rhodobacterales	Rhodobacteraceae	Paracoccus	Paracoccus sp. DMF	A0A4Y8P1J4	Paracoccus sp. DMF.	258	400837
MetQ/NlpA family ABC transporter substrate-binding protein	Bacteria	Proteobacteria	Alphaproteobacteria	Rhodobacterales	Rhodobacteraceae	Paracoccus	Paracoccus aeridis	A0A4T2AQI3	Paracoccus aeridis.	256	1966466
MetQ/NlpA family ABC transporter substrate-binding protein	Bacteria	Proteobacteria	Alphaproteobacteria	Rhodobacterales	Rhodobacteraceae	Sulfitobacter	Sulfitobacter sp. S4J41	A0A4R5EGN8	Sulfitobacter sp. S4J41.	258	2546227
MetQ/NlpA family ABC transporter substrate-binding protein	Bacteria	Proteobacteria	Alphaproteobacteria	Rhodobacterales	Rhodobacteraceae	Pseudorhodobacter	Pseudorhodobacter sp. S12M18	A0A4P8ED00	Pseudorhodobacter sp. S12M18.	258	2500533
D-methionine-binding lipoprotein MetQ	Bacteria	Proteobacteria	Alphaproteobacteria	Rhodobacterales	Rhodobacteraceae	Paracoccus	Paracoccus sp. M1-83	A0A447ITK4	Paracoccus sp. M1-83.	258	2491866
MetQ/NlpA family ABC transporter substrate-binding protein	Bacteria	Proteobacteria	Alphaproteobacteria	Rhodobacterales	Rhodobacteraceae	Sinirhodobacter	Sinirhodobacter populi	A0A443KHU6	Sinirhodobacter populi.	267	2306993
ABC transporter substrate-binding protein	Bacteria	Proteobacteria	Alphaproteobacteria	Rhodobacterales	Rhodobacteraceae	Sinirhodobacter	Sinirhodobacter populi	A0A443J4E4	Sinirhodobacter populi.	274	2306993
MetQ/NlpA family ABC transporter substrate-binding protein	Bacteria	Proteobacteria	Alphaproteobacteria	Rhodobacterales	Rhodobacteraceae	Sinirhodobacter	Sinirhodobacter populi	A0A443IL62	Sinirhodobacter populi.	265	2306993
MetQ/NlpA family ABC transporter substrate-binding protein	Bacteria	Proteobacteria	Alphaproteobacteria	Rhodobacterales	Rhodobacteraceae	Rhodobacter	Rhodobacter sp. BO-81	A0A421BUC3	Rhodobacter sp. BO-81.	258	2294033
MetQ/NlpA family ABC transporter substrate-binding protein	Bacteria	Proteobacteria	Alphaproteobacteria	Rhodobacterales	Rhodobacteraceae	Paracoccus	Paracoccus siganidrum	A0A419A801	Paracoccus siganidrum.	257	1276757
MetQ/NlpA family ABC transporter substrate-binding protein	Bacteria	Proteobacteria	Alphaproteobacteria	Rhodobacterales	Rhodobacteraceae	Paracoccus	Paracoccus aestuarii	A0A418ZQL9	Paracoccus aestuarii.	257	453842
D-methionine-binding lipoprotein MetQ	Bacteria	Proteobacteria	Alphaproteobacteria	Rhodobacterales	Rhodobacteraceae	unclassified Rhodobacteraceae	Rhodobacteraceae bacterium Lw-13e	A0A418SHJ7	Rhodobacteraceae bacterium Lw-13e.	257	1537215
Lipoprotein	Bacteria	Proteobacteria	Alphaproteobacteria	Rhodobacterales	Rhodobacteraceae	Gemmobacter	Gemmobacter intermedius	A0A3S3Y7W5	Gemmobacter intermedius.	270	1553448
Lipoprotein	Bacteria	Proteobacteria	Alphaproteobacteria	Rhodobacterales	Rhodobacteraceae	Xinfangfangia	Xinfangfangia sp. CIP 111625	A0A3P5XKM9	Xinfangfangia sp. CIP 111625.	266	2483812
Uncharacterized protein	Bacteria	Proteobacteria	Alphaproteobacteria	Rhodobacterales	Rhodobacteraceae	unclassified Rhodobacteraceae	Rhodobacteraceae bacterium CH30	A0A3N9Q7K6	Rhodobacteraceae bacterium CH30.	269	2490538
MetQ/NlpA family ABC transporter substrate-binding protein	Bacteria	Proteobacteria	Alphaproteobacteria	Rhodobacterales	Rhodobacteraceae	Paracoccus	Paracoccus sp. BP8	A0A3N7GHI6	Paracoccus sp. BP8.	277	2305219
D-methionine transport system substrate-binding protein	Bacteria	Proteobacteria	Alphaproteobacteria	Rhodobacterales	Rhodobacteraceae	Pacificibacter	Pacificibacter maritimus	A0A3N4UHC4	Pacificibacter maritimus.	258	762213
MetQ/NlpA family ABC transporter substrate-binding protein	Bacteria	Proteobacteria	Alphaproteobacteria	Rhodobacterales	Rhodobacteraceae	Paracoccus	Paracoccus yeei	A0A386UI03	Paracoccus yeei.	258	147645
Lipoprotein	Bacteria	Proteobacteria	Alphaproteobacteria	Rhodobacterales	Rhodobacteraceae	Pannonibacter	Pannonibacter phragmitetus	A0A378ZYG5	Pannonibacter phragmitetus.	265	121719
D-methionine transport system substrate-binding protein	Bacteria	Proteobacteria	Alphaproteobacteria	Rhodobacterales	Rhodobacteraceae	Paracoccus	Paracoccus lutimaris	A0A368Z980	Paracoccus lutimaris.	260	1490030
Metal ABC transporter substrate-binding protein	Bacteria	Proteobacteria	Alphaproteobacteria	Rhodobacterales	Rhodobacteraceae	Paracoccus	Paracoccus denitrificans	A0A2W4ZW05	Paracoccus denitrificans.	256	266
Metal ABC transporter substrate-binding protein	Bacteria	Proteobacteria	Alphaproteobacteria	Rhodobacterales	Rhodobacteraceae	Paracoccus	Paracoccus denitrificans	A0A2W4ZU00	Paracoccus denitrificans.	276	266
Metal ABC transporter substrate-binding protein	Bacteria	Proteobacteria	Alphaproteobacteria	Rhodobacterales	Rhodobacteraceae	Paracoccus	Paracoccus denitrificans	A0A2W4ZSU8	Paracoccus denitrificans.	267	266
D-methionine transport system substrate-binding protein	Bacteria	Proteobacteria	Alphaproteobacteria	Rhodobacterales	Rhodobacteraceae	Rhodovulum	Rhodovulum kholense	A0A2T5UKJ3	Rhodovulum kholense.	258	453584
Metal ABC transporter substrate-binding protein	Bacteria	Proteobacteria	Alphaproteobacteria	Rhodobacterales	Rhodobacteraceae	Cereibacter	Cereibacter changlensis JA139	A0A2T4JQC7	Cereibacter changlensis JA139.	258	1188249
Lipoprotein	Bacteria	Proteobacteria	Alphaproteobacteria	Rhodobacterales	Rhodobacteraceae	Pseudorhodobacter	Pseudorhodobacter sp. MZDSW-24AT	A0A2M8MYM9	Pseudorhodobacter sp. MZDSW-24AT.	275	2052957
Metal ABC transporter substrate-binding protein	Bacteria	Proteobacteria	Alphaproteobacteria	Rhodobacterales	Rhodobacteraceae	Paracoccus	Paracoccus jeotgali	A0A2K9MHA1	Paracoccus jeotgali.	258	2065379
Metal ABC transporter substrate-binding protein	Bacteria	Proteobacteria	Alphaproteobacteria	Rhodobacterales	Rhodobacteraceae	unclassified Rhodobacteraceae	Rhodobacteraceae bacterium	A0A2E3PDZ4	Rhodobacteraceae bacterium.	257	1904441
Lipoprotein	Bacteria	Proteobacteria	Alphaproteobacteria	Rhodobacterales	Rhodobacteraceae	Pseudorhodobacter	Pseudorhodobacter sp. PARRP1	A0A257GTP0	Pseudorhodobacter sp. PARRP1.	272	2015560
D-methionine transport system substrate-binding protein	Bacteria	Proteobacteria	Alphaproteobacteria	Rhodobacterales	Rhodobacteraceae	Paracoccus	Paracoccus seriniphilus	A0A239Q110	Paracoccus seriniphilus.	258	184748
D-methionine-binding lipoprotein MetQ	Bacteria	Proteobacteria	Alphaproteobacteria	Rhodobacterales	Rhodobacteraceae	Pacificibacter	Pacificibacter marinus	A0A1Y5TIT6	Pacificibacter marinus.	258	658057
D-methionine transport system substrate-binding protein	Bacteria	Proteobacteria	Alphaproteobacteria	Rhodobacterales	Rhodobacteraceae	Paracoccus	Paracoccus sp. J56	A0A1X7HXI7	Paracoccus sp. J56.	260	935850
D-methionine-binding lipoprotein MetQ	Bacteria	Proteobacteria	Alphaproteobacteria	Rhodobacterales	Rhodobacteraceae	Pseudooceanicola	Pseudooceanicola marinus	A0A1X6Z254	Pseudooceanicola marinus.	259	396013
D-methionine binding lipoprotein| ABC-type metal ion transporter	Bacteria	Proteobacteria	Alphaproteobacteria	Rhodobacterales	Rhodobacteraceae	Ketogulonicigenium	Ketogulonicigenium robustum	A0A1W6P124	Ketogulonicigenium robustum.	264	92947
Metal ABC transporter substrate-binding protein	Bacteria	Proteobacteria	Alphaproteobacteria	Rhodobacterales	Rhodobacteraceae	Paracoccus	Paracoccus contaminans	A0A1W6CWU5	Paracoccus contaminans.	259	1945662
MetQ/NlpA family ABC transporter substrate-binding protein	Bacteria	Proteobacteria	Alphaproteobacteria	Rhodobacterales	Rhodobacteraceae	Paracoccus	Paracoccus yeei	A0A1V0GUB9	Paracoccus yeei.	258	147645
Metal ABC transporter substrate-binding protein	Bacteria	Proteobacteria	Alphaproteobacteria	Rhodobacterales	Rhodobacteraceae	Paracoccus	Paracoccus yeei	A0A1V0GU83	Paracoccus yeei.	266	147645
Metal ABC transporter substrate-binding protein	Bacteria	Proteobacteria	Alphaproteobacteria	Rhodobacterales	Rhodobacteraceae	Paracoccus	Paracoccus yeei	A0A1V0GU68	Paracoccus yeei.	265	147645
Dioxygenase	Bacteria	Proteobacteria	Alphaproteobacteria	Rhodobacterales	Rhodobacteraceae	Paracoccus	Paracoccus sp. SM22M-07	A0A1L9BPH9	Paracoccus sp. SM22M-07.	257	1520813
D-methionine transport system substrate-binding protein	Bacteria	Proteobacteria	Alphaproteobacteria	Rhodobacterales	Rhodobacteraceae	Paracoccus	Paracoccus aminovorans	A0A1I2YYH4	Paracoccus aminovorans.	260	34004
D-methionine transport system substrate-binding protein	Bacteria	Proteobacteria	Alphaproteobacteria	Rhodobacterales	Rhodobacteraceae	Paracoccus	Paracoccus homiensis	A0A1I0DBK9	Paracoccus homiensis.	258	364199
D-methionine transport system substrate-binding protein	Bacteria	Proteobacteria	Alphaproteobacteria	Rhodobacterales	Rhodobacteraceae	Paracoccus	Paracoccus alcaliphilus	A0A1H8HQJ2	Paracoccus alcaliphilus.	258	34002
D-methionine transport system substrate-binding protein	Bacteria	Proteobacteria	Alphaproteobacteria	Rhodobacterales	Rhodobacteraceae	Gemmobacter	Gemmobacter aquatilis	A0A1H7Y1N0	Gemmobacter aquatilis.	268	933059
D-methionine transport system substrate-binding protein	Bacteria	Proteobacteria	Alphaproteobacteria	Rhodobacterales	Rhodobacteraceae	Rhodobacter	Rhodobacter sp. 24-YEA-8	A0A1H4ZB69	Rhodobacter sp. 24-YEA-8.	269	1884310
D-methionine transport system substrate-binding protein	Bacteria	Proteobacteria	Alphaproteobacteria	Rhodobacterales	Rhodobacteraceae	Rhodobacter	Rhodobacter sp. 24-YEA-8	A0A1H4Z9P3	Rhodobacter sp. 24-YEA-8.	265	1884310
Lipoprotein	Bacteria	Proteobacteria	Alphaproteobacteria	Rhodobacterales	Rhodobacteraceae	Rhodobacter	Rhodobacter sp. 24-YEA-8	A0A1H4YSV6	Rhodobacter sp. 24-YEA-8.	270	1884310
Lipoprotein	Bacteria	Proteobacteria	Alphaproteobacteria	Rhodobacterales	Rhodobacteraceae	Rhodobacter	Rhodobacter sp. 24-YEA-8	A0A1H4PHH2	Rhodobacter sp. 24-YEA-8.	269	1884310
D-methionine transport system substrate-binding protein	Bacteria	Proteobacteria	Alphaproteobacteria	Rhodobacterales	Rhodobacteraceae	Paracoccus	Paracoccus chinensis	A0A1G9KP79	Paracoccus chinensis.	256	525640
D-methionine transport system substrate-binding protein	Bacteria	Proteobacteria	Alphaproteobacteria	Rhodobacterales	Rhodobacteraceae	Paracoccus	Paracoccus isoporae	A0A1G7DIG5	Paracoccus isoporae.	257	591205
D-methionine transport system substrate-binding protein	Bacteria	Proteobacteria	Alphaproteobacteria	Rhodobacterales	Rhodobacteraceae	Paracoccus	Paracoccus tibetensis	A0A1G5DK64	Paracoccus tibetensis.	257	336292
Metal ABC transporter substrate-binding protein	Bacteria	Proteobacteria	Alphaproteobacteria	Rhodobacterales	Rhodobacteraceae	Yangia	Yangia sp. CCB-MM3	A0A1B1PVH9	Yangia sp. CCB-MM3.	258	1792508
ABC transporter substrate-binding protein	Bacteria	Proteobacteria	Alphaproteobacteria	Rhodobacterales	Rhodobacteraceae	Epibacterium	Epibacterium mobile F1926	A0A1B1A8B7	Epibacterium mobile F1926.	275	1265309
Metal ABC transporter substrate-binding protein	Bacteria	Proteobacteria	Alphaproteobacteria	Rhodobacterales	Rhodobacteraceae	Epibacterium	Epibacterium mobile F1926	A0A1B0ZYJ2	Epibacterium mobile F1926.	258	1265309
Dioxygenase	Bacteria	Proteobacteria	Alphaproteobacteria	Rhodobacterales	Rhodobacteraceae	Paracoccus	Paracoccus sp. 228	A0A0D6TF50	Paracoccus sp. 228.	262	1192054
YaeC family lipoprotein	Bacteria	Proteobacteria	Alphaproteobacteria	Rhodobacterales	Rhodobacteraceae	Rhodovulum	Rhodovulum sulfidophilum	A0A0D6B0Q7	Rhodovulum sulfidophilum	258	35806
Lipoprotein| YaeC family	Bacteria	Proteobacteria	Alphaproteobacteria	Rhodobacterales	Rhodobacteraceae	Celeribacter	Celeribacter indicus	A0A0B5DVZ6	Celeribacter indicus.	258	1208324
D-methionine transport system substrate-binding protein	Bacteria	Proteobacteria	Alphaproteobacteria	Rhodobacterales	Rhodobacteraceae	Paracoccus	Paracoccus halophilus	A0A099F1V6	Paracoccus halophilus.	260	376733
Dioxygenase	Bacteria	Proteobacteria	Alphaproteobacteria	Rhodobacterales	Rhodobacteraceae	Haematobacter	Haematobacter massiliensis	A0A086Y374	Haematobacter massiliensis.	258	195105
Dioxygenase	Bacteria	Proteobacteria	Alphaproteobacteria	Rhodobacterales	Rhodobacteraceae	Paenirhodobacter	Paenirhodobacter enshiensis	A0A086Y1R4	Paenirhodobacter enshiensis.	258	1105367
Uncharacterized protein	Bacteria	Proteobacteria	Alphaproteobacteria	Rhodobacterales	Rhodobacteraceae	Paenirhodobacter	Paenirhodobacter enshiensis	A0A086XUS2	Paenirhodobacter enshiensis.	267	1105367
Dioxygenase	Bacteria	Proteobacteria	Alphaproteobacteria	Rhodobacterales	Rhodobacteraceae	Sulfitobacter	Sulfitobacter sp. CB2047	A0A085BSX2	Sulfitobacter sp. CB2047.	258	1525218
Lipoprotein	Bacteria	Proteobacteria	Alphaproteobacteria	Rhizobiales	Rhizobiaceae	Rhizobium/Agrobacterium group	Rhizobium favelukesii	W6RXC5	Rhizobium favelukesii.	278	348824
Lipoprotein	Bacteria	Proteobacteria	Alphaproteobacteria	Rhizobiales	Rhizobiaceae	Liberibacter	Candidatus Liberibacter americanus str. Sao Paulo	U6B4B7	Candidatus Liberibacter americanus str. Sao Paulo.	270	1261131
Lipoprotein	Bacteria	Proteobacteria	Alphaproteobacteria	Rhizobiales	Rhizobiaceae	Rhizobium/Agrobacterium group	Rhizobium etli bv. mimosae str. Mim1	S5SQ07	Rhizobium etli bv. mimosae str. Mim1.	279	1328306
D-methionine ABC transporter protein| periplasmic binding protein	Bacteria	Proteobacteria	Alphaproteobacteria	Rhizobiales	Rhizobiaceae	Rhizobium/Agrobacterium group	Rhizobium sp. NT-26	L0NJR3	Rhizobium sp. NT-26.	258	1125847
Methionine ABC transporter substrate-binding protein	Bacteria	Proteobacteria	Alphaproteobacteria	Rhizobiales	Rhizobiaceae	Liberibacter	Liberibacter crescens BT-1	L0EWP1	Liberibacter crescens (strain BT-1)	258	1215343
DL-methionine transporter subunit periplasmic-binding component of ABC superfamily	Bacteria	Proteobacteria	Alphaproteobacteria	Rhizobiales	Rhizobiaceae	Rhizobium/Agrobacterium group	Rhizobium mesoamericanum STM3625	K0Q5V2	Rhizobium mesoamericanum STM3625.	270	1211777
Lipoprotein	Bacteria	Proteobacteria	Alphaproteobacteria	Rhizobiales	Rhizobiaceae	Rhizobium/Agrobacterium group	Rhizobium sp. CF142	J1SK83	Rhizobium sp. CF142.	278	1144314
D-methionine-binding lipoprotein MetQ	Bacteria	Proteobacteria	Alphaproteobacteria	Rhizobiales	Rhizobiaceae	Sinorhizobium/Ensifer group	Sinorhizobium fredii USDA 257	I3XDC5	Sinorhizobium fredii USDA 257.	259	1185652
Lipoprotein	Bacteria	Proteobacteria	Alphaproteobacteria	Rhizobiales	Rhizobiaceae	Rhizobium/Agrobacterium group	Rhizobium sp. PDO1-076	H4F3S5	Rhizobium sp. PDO1-076.	265	1125979
Lipoprotein	Bacteria	Proteobacteria	Alphaproteobacteria	Rhizobiales	Rhizobiaceae	Rhizobium/Agrobacterium group	Rhizobium sp. PDO1-076	H4F3S1	Rhizobium sp. PDO1-076.	276	1125979
Outer membrane lipoprotein	Bacteria	Proteobacteria	Alphaproteobacteria	Rhizobiales	Rhizobiaceae	Rhizobium/Agrobacterium group	Agrobacterium vitis S4	B9K4X5	Agrobacterium vitis (strain S4 / ATCC BAA-846)	266	311402
Lipoprotein	Bacteria	Proteobacteria	Alphaproteobacteria	Rhizobiales	Rhizobiaceae	Rhizobium/Agrobacterium group	Agrobacterium vitis S4	B9K4X2	Agrobacterium vitis (strain S4 / ATCC BAA-846)	266	311402
Amino acid ABC transporter	Bacteria	Proteobacteria	Alphaproteobacteria	Rhizobiales	Rhizobiaceae	Rhizobium/Agrobacterium group	Agrobacterium radiobacter K84	B9JJ03	Agrobacterium radiobacter (strain K84 / ATCC BAA-868)	267	311403
Lipoprotein	Bacteria	Proteobacteria	Alphaproteobacteria	Rhizobiales	Rhizobiaceae	Rhizobium/Agrobacterium group	Agrobacterium radiobacter K84	B9J8X6	Agrobacterium radiobacter (strain K84 / ATCC BAA-868)	278	311403
Metal ABC transporter substrate-binding protein	Bacteria	Proteobacteria	Alphaproteobacteria	Rhizobiales	Rhizobiaceae	Rhizobium/Agrobacterium group	Rhizobium sp. SEMIA 4088	A0A5F1S6J1	Rhizobium sp. SEMIA 4088.	267	2137763
Iron ABC transporter substrate-binding protein	Bacteria	Proteobacteria	Alphaproteobacteria	Rhizobiales	Rhizobiaceae	Rhizobium/Agrobacterium group	Rhizobium smilacinae	A0A5C4XK28	Rhizobium smilacinae.	264	1395944
D-methionine transport system substrate-binding protein	Bacteria	Proteobacteria	Alphaproteobacteria	Rhizobiales	Rhizobiaceae	Rhizobium/Agrobacterium group	Neorhizobium alkalisoli	A0A561QNQ6	Neorhizobium alkalisoli.	258	528178
Lipoprotein	Bacteria	Proteobacteria	Alphaproteobacteria	Rhizobiales	Rhizobiaceae	Rhizobium/Agrobacterium group	Rhizobium straminoryzae	A0A549SML8	Rhizobium straminoryzae.	277	1387186
Metal ABC transporter substrate-binding protein	Bacteria	Proteobacteria	Alphaproteobacteria	Rhizobiales	Rhizobiaceae	Rhizobium/Agrobacterium group	Rhizobium naphthalenivorans	A0A512HJ18	Rhizobium naphthalenivorans.	259	1118451
Metal ABC transporter substrate-binding protein	Bacteria	Proteobacteria	Alphaproteobacteria	Rhizobiales	Rhizobiaceae	Rhizobium/Agrobacterium group	Rhizobium sp. SEMIA 4032	A0A4Z0SZJ0	Rhizobium sp. SEMIA 4032.	263	2137762
Metal ABC transporter substrate-binding protein	Bacteria	Proteobacteria	Alphaproteobacteria	Rhizobiales	Rhizobiaceae	Shinella	Shinella sp. MEC087	A0A4Y8QHX1	Shinella sp. MEC087.	279	1967501
Lipoprotein	Bacteria	Proteobacteria	Alphaproteobacteria	Rhizobiales	Rhizobiaceae	Shinella	Shinella sp. MEC087	A0A4Y8QGP1	Shinella sp. MEC087.	276	1967501
Metal ABC transporter substrate-binding protein	Bacteria	Proteobacteria	Alphaproteobacteria	Rhizobiales	Rhizobiaceae	Shinella	Shinella sp. MEC087	A0A4Y8QGK5	Shinella sp. MEC087.	267	1967501
Lipoprotein	Bacteria	Proteobacteria	Alphaproteobacteria	Rhizobiales	Rhizobiaceae	Rhizobium/Agrobacterium group	Rhizobium sp. BK333	A0A4R6NPC4	Rhizobium sp. BK333.	281	2512158
MetQ/NlpA family ABC transporter substrate-binding protein	Bacteria	Proteobacteria	Alphaproteobacteria	Rhizobiales	Rhizobiaceae	Rhizobium/Agrobacterium group	Rhizobium deserti	A0A4R5UNG9	Rhizobium sp. SPY-1.	258	2547961
Lipoprotein	Bacteria	Proteobacteria	Alphaproteobacteria	Rhizobiales	Rhizobiaceae	Rhizobium/Agrobacterium group	Rhizobium sp. BK418	A0A4R3GLP8	Rhizobium sp. BK418.	278	2512120
Lipoprotein	Bacteria	Proteobacteria	Alphaproteobacteria	Rhizobiales	Rhizobiaceae	Rhizobium/Agrobacterium group	Rhizobium sp. BK376	A0A4R3FZG8	Rhizobium sp. BK376.	281	2512149
D-methionine transport system substrate-binding protein	Bacteria	Proteobacteria	Alphaproteobacteria	Rhizobiales	Rhizobiaceae	Rhizobium/Agrobacterium group	Neorhizobium sp. JUb45	A0A4R3A9Q7	Neorhizobium sp. JUb45.	258	2485113
D-methionine transport system substrate-binding protein	Bacteria	Proteobacteria	Alphaproteobacteria	Rhizobiales	Rhizobiaceae	Rhizobium/Agrobacterium group	Neorhizobium sp. JUb45	A0A4R3A079	Neorhizobium sp. JUb45.	278	2485113
Lipoprotein	Bacteria	Proteobacteria	Alphaproteobacteria	Rhizobiales	Rhizobiaceae	Rhizobium/Agrobacterium group	Rhizobium sp. GV031	A0A4R2WX04	Rhizobium sp. GV031.	277	2135727
D-methionine transport system substrate-binding protein	Bacteria	Proteobacteria	Alphaproteobacteria	Rhizobiales	Rhizobiaceae	Rhizobium/Agrobacterium group	Rhizobium sp. BK251	A0A4R1RY94	Rhizobium sp. BK251.	267	2512125
Lipoprotein	Bacteria	Proteobacteria	Alphaproteobacteria	Rhizobiales	Rhizobiaceae	Rhizobium/Agrobacterium group	Rhizobium sp. BK251	A0A4R1RPK5	Rhizobium sp. BK251.	278	2512125
Lipoprotein	Bacteria	Proteobacteria	Alphaproteobacteria	Rhizobiales	Rhizobiaceae	Rhizobium/Agrobacterium group	Rhizobium sp. BK696	A0A4Q7S0A2	Rhizobium sp. BK696.	278	2512157
Lipoprotein	Bacteria	Proteobacteria	Alphaproteobacteria	Rhizobiales	Rhizobiaceae	Agrobacterium	Agrobacterium tumefaciens	A0A4D7XDL0	Rhizobium radiobacter	277	358
Lipoprotein	Bacteria	Proteobacteria	Alphaproteobacteria	Rhizobiales	Rhizobiaceae	Rhizobium/Agrobacterium group	Agrobacterium larrymoorei	A0A4D7DZJ6	Agrobacterium larrymoorei.	276	160699
MetQ/NlpA family ABC transporter substrate-binding protein	Bacteria	Proteobacteria	Alphaproteobacteria	Rhizobiales	Rhizobiaceae	Georhizobium	Georhizobium profundi	A0A3S9B6N3	Georhizobium profundi.	261	2341112
MetQ/NlpA family ABC transporter substrate-binding protein	Bacteria	Proteobacteria	Alphaproteobacteria	Rhizobiales	Rhizobiaceae	Rhizobium/Agrobacterium group	Rhizobium sp. 24NR	A0A3S4UJ23	Rhizobium sp. 24NR.	263	2503024
MetQ/NlpA family ABC transporter substrate-binding protein	Bacteria	Proteobacteria	Alphaproteobacteria	Rhizobiales	Rhizobiaceae	Rhizobium/Agrobacterium group	Rhizobium sp. 24NR	A0A3S3RVF5	Rhizobium sp. 24NR.	258	2503024
Metal ABC transporter substrate-binding protein	Bacteria	Proteobacteria	Alphaproteobacteria	Rhizobiales	Rhizobiaceae	Rhizobium	Rhizobium sp.	A0A3D3BFT5	Rhizobium sp.	259	391
Lipoprotein	Bacteria	Proteobacteria	Alphaproteobacteria	Rhizobiales	Rhizobiaceae	Sinorhizobium/Ensifer group	Ensifer sp. M14	A0A395KYR2	Ensifer sp. M14.	282	2203782
D-methionine ABC transporter substrate-binding protein	Bacteria	Proteobacteria	Alphaproteobacteria	Rhizobiales	Rhizobiaceae	Rhizobium/Agrobacterium group	Neorhizobium sp. NCHU2750	A0A386E6Z0	Neorhizobium sp. NCHU2750.	264	1825976
D-methionine ABC transporter substrate-binding protein	Bacteria	Proteobacteria	Alphaproteobacteria	Rhizobiales	Rhizobiaceae	Rhizobium/Agrobacterium group	Neorhizobium sp. NCHU2750	A0A386E208	Neorhizobium sp. NCHU2750.	259	1825976
D-methionine ABC transporter substrate-binding protein	Bacteria	Proteobacteria	Alphaproteobacteria	Rhizobiales	Rhizobiaceae	Rhizobium/Agrobacterium group	Neorhizobium sp. NCHU2750	A0A386E1M1	Neorhizobium sp. NCHU2750.	258	1825976
Lipoprotein	Bacteria	Proteobacteria	Alphaproteobacteria	Rhizobiales	Rhizobiaceae	Shinella	Shinella sp. WSJ-2	A0A372NCH6	Shinella sp. WSJ-2.	277	2303749
Metal ABC transporter substrate-binding protein	Bacteria	Proteobacteria	Alphaproteobacteria	Rhizobiales	Rhizobiaceae	Rhizobium/Agrobacterium group	Neorhizobium sp. SOG26	A0A346YP54	Neorhizobium sp. SOG26.	258	2060726
Metal ABC transporter substrate-binding protein	Bacteria	Proteobacteria	Alphaproteobacteria	Rhizobiales	Rhizobiaceae	Shinella	Shinella sp.	A0A2W6VE28	Shinella sp.	259	1870904
Lipoprotein	Bacteria	Proteobacteria	Alphaproteobacteria	Rhizobiales	Rhizobiaceae	Shinella	Shinella sp.	A0A2W6TNR3	Shinella sp.	265	1870904
Metal ABC transporter substrate-binding protein	Bacteria	Proteobacteria	Alphaproteobacteria	Rhizobiales	Rhizobiaceae	Shinella	Shinella sp.	A0A2W6THD4	Shinella sp.	259	1870904
Lipoprotein	Bacteria	Proteobacteria	Alphaproteobacteria	Rhizobiales	Rhizobiaceae	Rhizobium/Agrobacterium group	Rhizobium tubonense	A0A2W4ERA0	Rhizobium tubonense.	281	484088
Metal ABC transporter substrate-binding protein	Bacteria	Proteobacteria	Alphaproteobacteria	Rhizobiales	Rhizobiaceae	Rhizobium/Agrobacterium group	Rhizobium tumorigenes	A0A2W4C963	Rhizobium tumorigenes.	267	2041385
Lipoprotein	Bacteria	Proteobacteria	Alphaproteobacteria	Rhizobiales	Rhizobiaceae	Rhizobium/Agrobacterium group	Rhizobium tumorigenes	A0A2W4BUR1	Rhizobium tumorigenes.	282	2041385
D-methionine transport system substrate-binding protein	Bacteria	Proteobacteria	Alphaproteobacteria	Rhizobiales	Rhizobiaceae	Rhizobium/Agrobacterium group	Rhizobium sp. PP-F2F-G20b	A0A2V4V972	Rhizobium sp. PP-F2F-G20b.	267	2183981
Lipoprotein	Bacteria	Proteobacteria	Alphaproteobacteria	Rhizobiales	Rhizobiaceae	Liberibacter	Candidatus Liberibacter europaeus	A0A2T4VYK5	Candidatus Liberibacter europaeus.	268	744859
MetQ/NlpA family ABC transporter substrate-binding protein	Bacteria	Proteobacteria	Alphaproteobacteria	Rhizobiales	Rhizobiaceae	Rhizobium/Agrobacterium group	Rhizobium sp. KAs_5_22	A0A2S6BDH3	Rhizobium sp. KAs_5_22.	259	2067668
Lipoprotein	Bacteria	Proteobacteria	Alphaproteobacteria	Rhizobiales	Rhizobiaceae	Rhizobium/Agrobacterium group	Rhizobium sp. NXC24	A0A2L0WDF9	Rhizobium sp. NXC24.	281	2048897
Lipoprotein	Bacteria	Proteobacteria	Alphaproteobacteria	Rhizobiales	Rhizobiaceae	Rhizobium/Agrobacterium group	Rhizobium sp. H4	A0A2A6QZD2	Rhizobium sp. H4.	279	2035449
Metal ABC transporter substrate-binding protein	Bacteria	Proteobacteria	Alphaproteobacteria	Rhizobiales	Rhizobiaceae	Rhizobium/Agrobacterium group	Rhizobium sp. ACO-34A	A0A292E9J1	Rhizobium sp. ACO-34A.	259	1571470
Lipoprotein	Bacteria	Proteobacteria	Alphaproteobacteria	Rhizobiales	Rhizobiaceae	Rhizobium/Agrobacterium group	Rhizobium sp. ACO-34A	A0A292E2Q4	Rhizobium sp. ACO-34A.	265	1571470
Lipoprotein	Bacteria	Proteobacteria	Alphaproteobacteria	Rhizobiales	Rhizobiaceae	Rhizobium/Agrobacterium group	Rhizobium subbaraonis	A0A285UMR2	Rhizobium subbaraonis.	283	908946
D-methionine transport system substrate-binding protein	Bacteria	Proteobacteria	Alphaproteobacteria	Rhizobiales	Rhizobiaceae	Rhizobium/Agrobacterium group	Rhizobium subbaraonis	A0A285UFP0	Rhizobium subbaraonis.	264	908946
D-methionine transport system substrate-binding protein	Bacteria	Proteobacteria	Alphaproteobacteria	Rhizobiales	Rhizobiaceae	Rhizobium/Agrobacterium group	Rhizobium sp. RU36D	A0A1W1Z6D0	Rhizobium sp. RU36D.	259	1907415
Lipoprotein	Bacteria	Proteobacteria	Alphaproteobacteria	Rhizobiales	Rhizobiaceae	Rhizobium/Agrobacterium group	Rhizobium oryzae	A0A1Q9AZ08	Rhizobium oryzae.	280	464029
Metal ABC transporter substrate-binding protein	Bacteria	Proteobacteria	Alphaproteobacteria	Rhizobiales	Rhizobiaceae	Rhizobium/Agrobacterium group	Rhizobium rhizosphaerae	A0A1Q9AHL3	Rhizobium rhizosphaerae.	267	1672749
Lipoprotein	Bacteria	Proteobacteria	Alphaproteobacteria	Rhizobiales	Rhizobiaceae	Rhizobium/Agrobacterium group	Rhizobium taibaishanense	A0A1Q9A832	Rhizobium taibaishanense.	275	887144
Metal ABC transporter substrate-binding protein	Bacteria	Proteobacteria	Alphaproteobacteria	Rhizobiales	Rhizobiaceae	Rhizobium/Agrobacterium group	Rhizobium oryziradicis	A0A1Q8ZX54	Rhizobium oryziradicis.	259	1867956
D-methionine transport system substrate-binding protein	Bacteria	Proteobacteria	Alphaproteobacteria	Rhizobiales	Rhizobiaceae	Rhizobium/Agrobacterium group	Rhizobium sp. NFR07	A0A1I0Z4T4	Rhizobium sp. NFR07.	258	1566262
Lipoprotein	Bacteria	Proteobacteria	Alphaproteobacteria	Rhizobiales	Rhizobiaceae	Rhizobium/Agrobacterium group	Pararhizobium polonicum	A0A1C7P741	Pararhizobium polonicum.	277	1612624
Dioxygenase	Bacteria	Proteobacteria	Alphaproteobacteria	Rhizobiales	Rhizobiaceae	Rhizobium/Agrobacterium group	Pararhizobium polonicum	A0A1C7P5X1	Pararhizobium polonicum.	258	1612624
Metal ABC transporter substrate-binding protein	Bacteria	Proteobacteria	Alphaproteobacteria	Rhizobiales	Rhizobiaceae	Agrobacterium	Agrobacterium tumefaciens	A0A1B9UPV0	Rhizobium radiobacter	265	358
D-methionine transport system substrate-binding protein	Bacteria	Proteobacteria	Alphaproteobacteria	Rhizobiales	Rhizobiaceae	Agrobacterium	Agrobacterium tumefaciens	A0A1B9TJ78	Rhizobium radiobacter	259	358
Lipoprotein	Bacteria	Proteobacteria	Alphaproteobacteria	Rhizobiales	Rhizobiaceae	Rhizobium/Agrobacterium group	Rhizobium sp. AC44/96	A0A1B9SGZ7	Rhizobium sp. AC44/96.	278	1841654
Lipoprotein	Bacteria	Proteobacteria	Alphaproteobacteria	Rhizobiales	Rhizobiaceae	Rhizobium/Agrobacterium group	Rhizobium sp. AC27/96	A0A1B9RRX1	Rhizobium sp. AC27/96.	282	1841653
Lipo| YaeC family protein	Bacteria	Proteobacteria	Alphaproteobacteria	Rhizobiales	Rhizobiaceae	Sinorhizobium/Ensifer group	Sinorhizobium sp. RAC02	A0A1B3MKS5	Sinorhizobium sp. RAC02.	258	1842534
Metal ABC transporter substrate-binding protein	Bacteria	Proteobacteria	Alphaproteobacteria	Rhizobiales	Rhizobiaceae	Shinella	Shinella sp. HZN7	A0A1A9GB93	Shinella sp. HZN7.	279	879274
Metal ABC transporter substrate-binding protein	Bacteria	Proteobacteria	Alphaproteobacteria	Rhizobiales	Rhizobiaceae	Shinella	Shinella sp. HZN7	A0A1A9GAJ8	Shinella sp. HZN7.	267	879274
Methionine ABC transporter substrate-binding protein	Bacteria	Proteobacteria	Alphaproteobacteria	Rhizobiales	Rhizobiaceae	Sinorhizobium/Ensifer group	Sinorhizobium sp. GL28	A0A0T6Z8G3	Sinorhizobium sp. GL28.	258	1358418
Metal ABC transporter substrate-binding protein	Bacteria	Proteobacteria	Alphaproteobacteria	Rhizobiales	Rhizobiaceae	Rhizobium/Agrobacterium group	Rhizobium sp. Root482	A0A0T1WXD0	Rhizobium sp. Root482.	258	1736543
Lipoprotein	Bacteria	Proteobacteria	Alphaproteobacteria	Rhizobiales	Rhizobiaceae	Rhizobium/Agrobacterium group	Rhizobium sp. Root483D2	A0A0Q7P2P1	Rhizobium sp. Root483D2.	270	1736545
Metal ABC transporter substrate-binding protein	Bacteria	Proteobacteria	Alphaproteobacteria	Rhizobiales	Rhizobiaceae	Rhizobium/Agrobacterium group	Rhizobium sp. Root1212	A0A0Q6RZN0	Rhizobium sp. Root1212.	259	1736429
Metal ABC transporter substrate-binding protein	Bacteria	Proteobacteria	Alphaproteobacteria	Rhizobiales	Rhizobiaceae	Rhizobium/Agrobacterium group	Rhizobium sp. Leaf453	A0A0Q6GFY1	Rhizobium sp. Leaf453.	262	1736380
Lipoprotein	Bacteria	Proteobacteria	Alphaproteobacteria	Rhizobiales	Rhizobiaceae	Rhizobium/Agrobacterium group	Rhizobium sp. Leaf453	A0A0Q6GA45	Rhizobium sp. Leaf453.	282	1736380
Lipoprotein	Bacteria	Proteobacteria	Alphaproteobacteria	Rhizobiales	Rhizobiaceae	Rhizobium/Agrobacterium group	Rhizobium sp. Leaf383	A0A0Q5X4A1	Rhizobium sp. Leaf383.	286	1736357
Lipoprotein	Bacteria	Proteobacteria	Alphaproteobacteria	Rhizobiales	Rhizobiaceae	Rhizobium/Agrobacterium group	Rhizobium sp. Leaf371	A0A0Q5WTY0	Rhizobium sp. Leaf371.	282	1736355
Metal ABC transporter substrate-binding protein	Bacteria	Proteobacteria	Alphaproteobacteria	Rhizobiales	Rhizobiaceae	Rhizobium/Agrobacterium group	Rhizobium sp. Leaf306	A0A0Q5CPM0	Rhizobium sp. Leaf306.	258	1736330
Dioxygenase	Bacteria	Proteobacteria	Alphaproteobacteria	Rhizobiales	Rhizobiaceae	Rhizobium/Agrobacterium group	Rhizobium sp. LC145	A0A0M3BG83	Rhizobium sp. LC145.	258	1120688
Dioxygenase	Bacteria	Proteobacteria	Alphaproteobacteria	Rhizobiales	Rhizobiaceae	Sinorhizobium/Ensifer group	Ensifer adhaerens	A0A0L8BHL8	Ensifer adhaerens	258	106592
Dioxygenase	Bacteria	Proteobacteria	Alphaproteobacteria	Rhizobiales	Rhizobiaceae	Agrobacterium	Agrobacterium tumefaciens	A0A0D0KTG1	Rhizobium radiobacter	258	358
Lipoprotein	Bacteria	Proteobacteria	Alphaproteobacteria	Rhizobiales	Rhizobiaceae	Rhizobium/Agrobacterium group	Rhizobium gallicum bv. gallicum R602	A0A0B4XCH0	Rhizobium gallicum bv. gallicum R602.	278	1418105
Methionine-binding lipoprotein MetQ 2	Bacteria	Proteobacteria	Alphaproteobacteria	Rhizobiales	Rhizobiaceae	Rhizobium/Agrobacterium group	Rhizobium gallicum bv. gallicum R602	A0A0B4XAS9	Rhizobium gallicum bv. gallicum R602.	268	1418105
Methionine-binding lipoprotein MetQ 1	Bacteria	Proteobacteria	Alphaproteobacteria	Rhizobiales	Rhizobiaceae	Rhizobium/Agrobacterium group	Rhizobium gallicum bv. gallicum R602	A0A0B4X412	Rhizobium gallicum bv. gallicum R602.	258	1418105
Dioxygenase	Bacteria	Proteobacteria	Alphaproteobacteria	Rhizobiales	Rhizobiaceae	Rhizobium/Agrobacterium group	Rhizobium sp. YS-1r	A0A095WM35	Rhizobium sp. YS-1r.	258	1532558
Dioxygenase	Bacteria	Proteobacteria	Alphaproteobacteria	Rhizobiales	Rhizobiaceae	Rhizobium/Agrobacterium group	Pseudorhizobium pelagicum	A0A081MJ56	Pseudorhizobium pelagicum.	258	1509405
Lipoprotein	Bacteria	Proteobacteria	Alphaproteobacteria	Rhizobiales	Rhizobiaceae	Rhizobium/Agrobacterium group	Agrobacterium rubi TR3 = NBRC 13261	A0A081D1I7	Agrobacterium rubi TR3 = NBRC 13261.	276	1368415
Lipoprotein| YaeC family	Bacteria	Proteobacteria	Alphaproteobacteria	Rhizobiales	Rhizobiaceae	Rhizobium/Agrobacterium group	Neorhizobium galegae bv. orientalis str. HAMBI 540	A0A068ST09	Neorhizobium galegae bv. orientalis str. HAMBI 540.	258	1028800
Methionine-binding lipoprotein MetQ 1	Bacteria	Proteobacteria	Alphaproteobacteria	Rhizobiales	Rhizobiaceae	Rhizobium/Agrobacterium group	Rhizobium sp. IE4771	A0A060IHC0	Rhizobium sp. IE4771.	267	1301032
Lipoprotein	Bacteria	Proteobacteria	Alphaproteobacteria	Rhizobiales	Rhizobiaceae	Shinella	Shinella sp. DD12	A0A021X283	Shinella sp. DD12.	282	1410620
Lipoprotein	Bacteria	Proteobacteria	Alphaproteobacteria	Rhizobiales	Rhizobiaceae	Shinella	Shinella sp. DD12	A0A021WZU5	Shinella sp. DD12.	270	1410620
Lipoprotein	Bacteria	Proteobacteria	Alphaproteobacteria	Rhizobiales	Phyllobacteriaceae	Mesorhizobium	Mesorhizobium sp. L48C026A00	X6FLC8	Mesorhizobium sp. L48C026A00.	284	1287182
Lipoprotein	Bacteria	Proteobacteria	Alphaproteobacteria	Rhizobiales	Phyllobacteriaceae	Mesorhizobium	Mesorhizobium sp. L48C026A00	X6FCP5	Mesorhizobium sp. L48C026A00.	284	1287182
Lipoprotein	Bacteria	Proteobacteria	Alphaproteobacteria	Rhizobiales	Phyllobacteriaceae	Mesorhizobium	Mesorhizobium sp. LNJC372A00	X6C746	Mesorhizobium sp. LNJC372A00.	284	1287256
Lipoprotein	Bacteria	Proteobacteria	Alphaproteobacteria	Rhizobiales	Phyllobacteriaceae	Mesorhizobium	Mesorhizobium sp. LSHC420B00	V7FF15	Mesorhizobium sp. LSHC420B00.	282	1287292
Lipoprotein	Bacteria	Proteobacteria	Alphaproteobacteria	Rhizobiales	Phyllobacteriaceae	Mesorhizobium	Mesorhizobium japonicum MAFF 303099	Q98DA1	Mesorhizobium japonicum (strain LMG 29417 / CECT 9101 / MAFF 303099)	284	266835
Lipoprotein| YaeC family	Bacteria	Proteobacteria	Alphaproteobacteria	Rhizobiales	Phyllobacteriaceae	Phyllobacterium	Phyllobacterium sp. YR531	J3HS39	Phyllobacterium sp. YR531.	260	1144343
Lipoprotein	Bacteria	Proteobacteria	Alphaproteobacteria	Rhizobiales	Phyllobacteriaceae	Mesorhizobium	Mesorhizobium amorphae CCNWGS0123	G6YKT2	Mesorhizobium amorphae CCNWGS0123.	284	1082933
MetQ/NlpA family ABC transporter substrate-binding protein	Bacteria	Proteobacteria	Alphaproteobacteria	Rhizobiales	Phyllobacteriaceae	Mesorhizobium	Mesorhizobium albiziae	A0A5D4GUU8	Mesorhizobium albiziae.	260	335020
Lipoprotein	Bacteria	Proteobacteria	Alphaproteobacteria	Rhizobiales	Phyllobacteriaceae	Mesorhizobium	Mesorhizobium sp. 8	A0A5B8B6J7	Mesorhizobium sp. 8.	282	2584466
MetQ/NlpA family ABC transporter substrate-binding protein	Bacteria	Proteobacteria	Alphaproteobacteria	Rhizobiales	Phyllobacteriaceae	Aquamicrobium	Aquamicrobium sp. LC103	A0A4U6BZ90	Aquamicrobium sp. LC103.	259	1120658
Lipoprotein	Bacteria	Proteobacteria	Alphaproteobacteria	Rhizobiales	Phyllobacteriaceae	Mesorhizobium	Mesorhizobium sp.	A0A442QF88	Mesorhizobium sp.	284	1871066
Lipoprotein	Bacteria	Proteobacteria	Alphaproteobacteria	Rhizobiales	Phyllobacteriaceae	Mesorhizobium	Mesorhizobium sp.	A0A440BFT0	Mesorhizobium sp.	283	1871066
Lipoprotein	Bacteria	Proteobacteria	Alphaproteobacteria	Rhizobiales	Phyllobacteriaceae	Mesorhizobium	Mesorhizobium sp. DCY119	A0A3A3H470	Mesorhizobium sp. DCY119.	284	2108445
Lipoprotein	Bacteria	Proteobacteria	Alphaproteobacteria	Rhizobiales	Phyllobacteriaceae	Mesorhizobium	Mesorhizobium amorphae	A0A2W4ZL33	Mesorhizobium amorphae.	281	71433
Lipoprotein	Bacteria	Proteobacteria	Alphaproteobacteria	Rhizobiales	Phyllobacteriaceae	Aminobacter	Aminobacter sp. MSH1	A0A2S0XIS8	Aminobacter sp. MSH1.	282	374606
Lipoprotein	Bacteria	Proteobacteria	Alphaproteobacteria	Rhizobiales	Phyllobacteriaceae	Mesorhizobium	Mesorhizobium ephedrae	A0A2P7SRQ3	Mesorhizobium ephedrae.	282	2116701
Metal ABC transporter substrate-binding protein	Bacteria	Proteobacteria	Alphaproteobacteria	Rhizobiales	Phyllobacteriaceae	Mesorhizobium	Mesorhizobium soli	A0A2P7SK36	Mesorhizobium soli.	258	1295366
Lipoprotein	Bacteria	Proteobacteria	Alphaproteobacteria	Rhizobiales	Phyllobacteriaceae	Phyllobacterium	Phyllobacterium zundukense	A0A2N9VY97	Phyllobacterium zundukense.	270	1867719
Lipoprotein	Bacteria	Proteobacteria	Alphaproteobacteria	Rhizobiales	Phyllobacteriaceae	Mesorhizobium	Mesorhizobium prunaredense	A0A1R3V6R3	Mesorhizobium prunaredense.	282	1631249
Lipoprotein	Bacteria	Proteobacteria	Alphaproteobacteria	Rhizobiales	Phyllobacteriaceae	Mesorhizobium	Mesorhizobium sp. 65-26	A0A1Q4AGK9	Mesorhizobium sp. 65-26.	284	1895781
D-methionine transport system substrate-binding protein	Bacteria	Proteobacteria	Alphaproteobacteria	Rhizobiales	Phyllobacteriaceae	Aquamicrobium	Aquamicrobium aerolatum DSM 21857	A0A1I3S0C4	Aquamicrobium aerolatum DSM 21857.	260	1121003
Lipoprotein	Bacteria	Proteobacteria	Alphaproteobacteria	Rhizobiales	Phyllobacteriaceae	Phyllobacterium	Phyllobacterium sp. OV277	A0A1H0F0B0	Phyllobacterium sp. OV277.	281	1882772
Lipoprotein	Bacteria	Proteobacteria	Alphaproteobacteria	Rhizobiales	Phyllobacteriaceae	Mesorhizobium	Mesorhizobium sp. UASWS1009	A0A1C2DK02	Mesorhizobium sp. UASWS1009.	282	1566387
Lipoprotein	Bacteria	Proteobacteria	Alphaproteobacteria	Rhizobiales	Phyllobacteriaceae	Paramesorhizobium	Paramesorhizobium deserti	A0A135HSD2	Paramesorhizobium deserti.	278	1494590
Lipoprotein	Bacteria	Proteobacteria	Alphaproteobacteria	Rhizobiales	Phyllobacteriaceae	Aminobacter	Aminobacter sp. Root100	A0A0Q6M9L1	Aminobacter sp. Root100.	282	1736420
Lipoprotein	Bacteria	Proteobacteria	Alphaproteobacteria	Rhizobiales	Phyllobacteriaceae	Mesorhizobium	Mesorhizobium sp. ORS 3324	A0A090F8D4	Mesorhizobium sp. ORS 3324.	283	408180
Lipoprotein	Bacteria	Proteobacteria	Alphaproteobacteria	Rhizobiales	Phyllobacteriaceae	Aquamicrobium	Aquamicrobium defluvii	A0A011UER5	Aquamicrobium defluvii.	280	69279
MetQ/NlpA family ABC transporter substrate-binding protein	Bacteria	Proteobacteria	Alphaproteobacteria	Rhizobiales	Methylocystaceae	Hansschlegelia	Hansschlegelia sp. Dub	A0A4Q9GIP6	Hansschlegelia sp. Dub.	270	2528245
NLPA lipoprotein	Bacteria	Proteobacteria	Alphaproteobacteria	Rhizobiales	Methylocystaceae	Methylopila	Methylopila sp. Yamaguchi	A0A2H6B9W4	Methylopila sp. Yamaguchi.	267	1437817
DL-methionine transporter subunit periplasmic-binding component of ABC superfamily	Bacteria	Proteobacteria	Alphaproteobacteria	Rhizobiales	Methylocystaceae	Pleomorphomonas	uncultured Pleomorphomonas sp.	A0A212LH78	uncultured Pleomorphomonas sp.	262	442121
Lipoprotein	Bacteria	Proteobacteria	Alphaproteobacteria	Rhizobiales	Methylocystaceae	Pleomorphomonas	uncultured Pleomorphomonas sp.	A0A212LE85	uncultured Pleomorphomonas sp.	279	442121
Lipoprotein	Bacteria	Proteobacteria	Alphaproteobacteria	Rhizobiales	Methylobacteriaceae	Methylobacterium	Methylobacterium sp. GXF4	I9X225	Methylobacterium sp. GXF4.	267	1096546
ABC-type metal ion transport system| periplasmic component/surface antigen	Bacteria	Proteobacteria	Alphaproteobacteria	Rhizobiales	Methylobacteriaceae	Microvirga	Microvirga lotononidis	I4YVV7	Microvirga lotononidis.	290	864069
Lipoprotein| YaeC family	Bacteria	Proteobacteria	Alphaproteobacteria	Rhizobiales	Methylobacteriaceae	Methylobacterium	Methylobacterium nodulans ORS 2060	B8IJZ5	Methylobacterium nodulans (strain LMG 21967 / CNCM I-2342 / ORS 2060)	257	460265
NLPA lipoprotein	Bacteria	Proteobacteria	Alphaproteobacteria	Rhizobiales	Methylobacteriaceae	Methylobacterium	Methylobacterium nodulans ORS 2060	B8IE83	Methylobacterium nodulans (strain LMG 21967 / CNCM I-2342 / ORS 2060)	264	460265
Lipoprotein| YaeC family	Bacteria	Proteobacteria	Alphaproteobacteria	Rhizobiales	Methylobacteriaceae	Methylobacterium	Methylobacterium radiotolerans JCM 2831	B1LYD2	Methylobacterium radiotolerans (strain ATCC 27329 / DSM 1819 / JCM 2831 /NBRC 15690 / NCIMB 10815 / 0-1)	260	426355
Lipoprotein| YaeC family	Bacteria	Proteobacteria	Alphaproteobacteria	Rhizobiales	Methylobacteriaceae	Methylobacterium	Methylobacterium sp. 4-46	B0UP89	Methylobacterium sp. (strain 4-46)	260	426117
NLPA lipoprotein	Bacteria	Proteobacteria	Alphaproteobacteria	Rhizobiales	Methylobacteriaceae	Methylobacterium	Methylobacterium sp. 4-46	B0UNI4	Methylobacterium sp. (strain 4-46)	285	426117
MetQ/NlpA family ABC transporter substrate-binding protein	Bacteria	Proteobacteria	Alphaproteobacteria	Rhizobiales	Methylobacteriaceae	Microvirga	Microvirga tunisiensis	A0A5N7MIZ6	Microvirga tunisiensis.	290	2108360
Metal ABC transporter substrate-binding protein	Bacteria	Proteobacteria	Alphaproteobacteria	Rhizobiales	Methylobacteriaceae	Methylobacterium	Methylobacterium sp. WL8	A0A5C8WU85	Methylobacterium sp. WL8.	257	2603899
MetQ/NlpA family ABC transporter substrate-binding protein	Bacteria	Proteobacteria	Alphaproteobacteria	Rhizobiales	Methylobacteriaceae	Methylobacterium	Methylobacterium sp. WL7	A0A5C8VRK4	Methylobacterium sp. WL7.	259	2603900
MetQ/NlpA family ABC transporter substrate-binding protein	Bacteria	Proteobacteria	Alphaproteobacteria	Rhizobiales	Methylobacteriaceae	Methylobacterium	Methylobacterium sp. WL7	A0A5C8VG90	Methylobacterium sp. WL7.	264	2603900
D-methionine-binding lipoprotein MetQ	Bacteria	Proteobacteria	Alphaproteobacteria	Rhizobiales	Methylobacteriaceae	Methylobacterium	Methylobacterium dankookense	A0A564G651	Methylobacterium dankookense.	266	560405
Lipoprotein	Bacteria	Proteobacteria	Alphaproteobacteria	Rhizobiales	Methylobacteriaceae	Microvirga	Microvirga aerophila	A0A512C4D5	Microvirga aerophila.	258	670291
Lipoprotein	Bacteria	Proteobacteria	Alphaproteobacteria	Rhizobiales	Methylobacteriaceae	Microvirga	Microvirga aerophila	A0A512C3U6	Microvirga aerophila.	276	670291
D-methionine-binding lipoprotein MetQ	Bacteria	Proteobacteria	Alphaproteobacteria	Rhizobiales	Methylobacteriaceae	Methylobacterium	Methylobacterium sp. SB0023/3	A0A509ELP0	Methylobacterium sp. SB0023/3.	266	2584084
MetQ/NlpA family ABC transporter substrate-binding protein	Bacteria	Proteobacteria	Alphaproteobacteria	Rhizobiales	Methylobacteriaceae	Methylobacterium	Methylobacterium sp. 6HR-1	A0A4Z0NUB6	Methylobacterium sp. 6HR-1.	262	1141884
D-methionine transport system substrate-binding protein	Bacteria	Proteobacteria	Alphaproteobacteria	Rhizobiales	Methylobacteriaceae	Enterovirga	Enterovirga rhinocerotis	A0A4R7C8G3	Enterovirga rhinocerotis.	264	1339210
D-methionine transport system substrate-binding protein	Bacteria	Proteobacteria	Alphaproteobacteria	Rhizobiales	Methylobacteriaceae	Enterovirga	Enterovirga rhinocerotis	A0A4R7C8D3	Enterovirga rhinocerotis.	264	1339210
D-methionine transport system substrate-binding protein	Bacteria	Proteobacteria	Alphaproteobacteria	Rhizobiales	Methylobacteriaceae	Enterovirga	Enterovirga rhinocerotis	A0A4R7C788	Enterovirga rhinocerotis.	260	1339210
Lipoprotein	Bacteria	Proteobacteria	Alphaproteobacteria	Rhizobiales	Methylobacteriaceae	Enterovirga	Enterovirga rhinocerotis	A0A4R7C5U9	Enterovirga rhinocerotis.	273	1339210
D-methionine transport system substrate-binding protein	Bacteria	Proteobacteria	Alphaproteobacteria	Rhizobiales	Methylobacteriaceae	Enterovirga	Enterovirga rhinocerotis	A0A4R7BMX4	Enterovirga rhinocerotis.	264	1339210
D-methionine transport system substrate-binding protein	Bacteria	Proteobacteria	Alphaproteobacteria	Rhizobiales	Methylobacteriaceae	Enterovirga	Enterovirga rhinocerotis	A0A4R7BLH8	Enterovirga rhinocerotis.	264	1339210
MetQ/NlpA family ABC transporter substrate-binding protein	Bacteria	Proteobacteria	Alphaproteobacteria	Rhizobiales	Methylobacteriaceae	Methylobacterium	Methylobacterium sp. TER-1	A0A3S3UAK3	Methylobacterium sp. TER-1.	260	2499852
MetQ/NlpA family ABC transporter substrate-binding protein	Bacteria	Proteobacteria	Alphaproteobacteria	Rhizobiales	Methylobacteriaceae	Methylobacterium	Methylobacterium sp. TER-1	A0A3S2VBH2	Methylobacterium sp. TER-1.	260	2499852
Lipoprotein	Bacteria	Proteobacteria	Alphaproteobacteria	Rhizobiales	Methylobacteriaceae	Microvirga	Microvirga sp. 17 mud 1-3	A0A2Z3IM66	Microvirga sp. 17 mud 1-3.	269	2082949
Metal ABC transporter substrate-binding protein	Bacteria	Proteobacteria	Alphaproteobacteria	Rhizobiales	Methylobacteriaceae	Microvirga	Microvirga sp. 17 mud 1-3	A0A2Z3I7P0	Microvirga sp. 17 mud 1-3.	262	2082949
Metal ABC transporter substrate-binding protein	Bacteria	Proteobacteria	Alphaproteobacteria	Rhizobiales	Methylobacteriaceae	Methylobacterium	Methylobacterium sp. 17Sr1-1	A0A2U8X3N8	Methylobacterium sp. 17Sr1-1.	258	2202826
Metal ABC transporter substrate-binding protein	Bacteria	Proteobacteria	Alphaproteobacteria	Rhizobiales	Methylobacteriaceae	Methylobacterium	Methylobacterium sp. 17Sr1-43	A0A2U8VRT0	Methylobacterium sp. 17Sr1-43.	249	2202828
Metal ABC transporter substrate-binding protein	Bacteria	Proteobacteria	Alphaproteobacteria	Rhizobiales	Methylobacteriaceae	Methylobacterium	Methylobacterium sp. 17Sr1-43	A0A2U8VQT3	Methylobacterium sp. 17Sr1-43.	266	2202828
Lipoprotein	Bacteria	Proteobacteria	Alphaproteobacteria	Rhizobiales	Methylobacteriaceae	Methylobacterium	Methylobacterium currus	A0A2R4WUV4	Methylobacterium currus.	266	2051553
D-methionine transport system substrate-binding protein	Bacteria	Proteobacteria	Alphaproteobacteria	Rhizobiales	Methylobacteriaceae	Methylobacterium	Methylobacterium pseudosasicola	A0A1I4QEN3	Methylobacterium pseudosasicola.	297	582667
D-methionine transport system substrate-binding protein	Bacteria	Proteobacteria	Alphaproteobacteria	Rhizobiales	Methylobacteriaceae	Methylobacterium	Methylobacterium pseudosasicola	A0A1I4QEE6	Methylobacterium pseudosasicola.	266	582667
D-methionine transport system substrate-binding protein	Bacteria	Proteobacteria	Alphaproteobacteria	Rhizobiales	Methylobacteriaceae	Methylobacterium	Methylobacterium pseudosasicola	A0A1I4Q6T1	Methylobacterium pseudosasicola.	288	582667
D-methionine transport system substrate-binding protein	Bacteria	Proteobacteria	Alphaproteobacteria	Rhizobiales	Methylobacteriaceae	Methylobacterium	Methylobacterium pseudosasicola	A0A1I4MEV2	Methylobacterium pseudosasicola.	264	582667
Lipoprotein	Bacteria	Proteobacteria	Alphaproteobacteria	Rhizobiales	Methylobacteriaceae	Methylobacterium	Methylobacterium pseudosasicola	A0A1I4JDY7	Methylobacterium pseudosasicola.	265	582667
D-methionine transport system substrate-binding protein	Bacteria	Proteobacteria	Alphaproteobacteria	Rhizobiales	Methylobacteriaceae	Methylobacterium	Methylobacterium gossipiicola	A0A1I2QSM2	Methylobacterium gossipiicola.	266	582675
D-methionine transport system substrate-binding protein	Bacteria	Proteobacteria	Alphaproteobacteria	Rhizobiales	Methylobacteriaceae	Methylobacterium	Methylobacterium sp. ap11	A0A1H8YD17	Methylobacterium sp. ap11.	255	1761799
D-methionine transport system substrate-binding protein	Bacteria	Proteobacteria	Alphaproteobacteria	Rhizobiales	Methylobacteriaceae	Methylobacterium	Methylobacterium phyllostachyos	A0A1H0D3Z6	Methylobacterium phyllostachyos.	266	582672
D-methionine transport system substrate-binding protein	Bacteria	Proteobacteria	Alphaproteobacteria	Rhizobiales	Methylobacteriaceae	Methylobacterium	Methylobacterium phyllostachyos	A0A1H0D358	Methylobacterium phyllostachyos.	310	582672
D-methionine transport system substrate-binding protein	Bacteria	Proteobacteria	Alphaproteobacteria	Rhizobiales	Methylobacteriaceae	Methylobacterium	Methylobacterium phyllostachyos	A0A1G9RP45	Methylobacterium phyllostachyos.	260	582672
D-methionine transport system substrate-binding protein	Bacteria	Proteobacteria	Alphaproteobacteria	Rhizobiales	Methylobacteriaceae	Microvirga	Microvirga guangxiensis	A0A1G5JFT0	Microvirga guangxiensis.	261	549386
Lipoprotein	Bacteria	Proteobacteria	Alphaproteobacteria	Rhizobiales	Methylobacteriaceae	Methylobacterium	Methylobacterium sp. SCN 67-24	A0A1E4DJ38	Methylobacterium sp. SCN 67-24.	266	1660110
Methionine ABC transporter substrate-binding protein	Bacteria	Proteobacteria	Alphaproteobacteria	Rhizobiales	Methylobacteriaceae	Microvirga	Microvirga ossetica	A0A1B2EJQ1	Microvirga ossetica.	278	1882682
Methionine-binding protein	Bacteria	Proteobacteria	Alphaproteobacteria	Rhizobiales	Methylobacteriaceae	Methylobacterium	Methylobacterium indicum	A0A147FQ02	Methylobacterium indicum.	290	1775910
Methionine ABC transporter substrate-binding protein	Bacteria	Proteobacteria	Alphaproteobacteria	Rhizobiales	Methylobacteriaceae	Methylobacterium	Methylobacterium indicum	A0A147FPW9	Methylobacterium indicum.	269	1775910
Metal ABC transporter substrate-binding protein	Bacteria	Proteobacteria	Alphaproteobacteria	Rhizobiales	Methylobacteriaceae	Methylobacterium	Methylobacterium sp. Leaf113	A0A0S9SF46	Methylobacterium sp. Leaf113.	264	1736259
Metal ABC transporter substrate-binding protein	Bacteria	Proteobacteria	Alphaproteobacteria	Rhizobiales	Methylobacteriaceae	Methylobacterium	Methylobacterium sp. Leaf112	A0A0S9PWB2	Methylobacterium sp. Leaf112.	266	1736258
Lipoprotein	Bacteria	Proteobacteria	Alphaproteobacteria	Rhizobiales	Methylobacteriaceae	Methylobacterium	Methylobacterium sp. Leaf93	A0A0Q4XU41	Methylobacterium sp. Leaf93.	265	1736249
Metal ABC transporter substrate-binding protein	Bacteria	Proteobacteria	Alphaproteobacteria	Rhizobiales	Methylobacteriaceae	Methylobacterium	Methylobacterium sp. Leaf99	A0A0Q4XFA8	Methylobacterium sp. Leaf99.	266	1736251
Methionine ABC transporter substrate-binding protein	Bacteria	Proteobacteria	Alphaproteobacteria	Rhizobiales	Methylobacteriaceae	Methylobacterium	Methylobacterium sp. Leaf86	A0A0Q4UCS7	Methylobacterium sp. Leaf86.	266	1736242
Dioxygenase	Bacteria	Proteobacteria	Alphaproteobacteria	Rhizobiales	Methylobacteriaceae	Methylobacterium	Methylobacterium sp. ARG-1	A0A0L6JAQ9	Methylobacterium sp. ARG-1.	259	1692501
Dioxygenase	Bacteria	Proteobacteria	Alphaproteobacteria	Rhizobiales	Methylobacteriaceae	Methylobacterium	Methylobacterium sp. ARG-1	A0A0L6J0P6	Methylobacterium sp. ARG-1.	259	1692501
Dioxygenase	Bacteria	Proteobacteria	Alphaproteobacteria	Rhizobiales	Methylobacteriaceae	Microvirga	Microvirga vignae	A0A0H1R8R1	Microvirga vignae.	261	1225564
Lipoprotein	Bacteria	Proteobacteria	Alphaproteobacteria	Rhizobiales	Methylobacteriaceae	Microvirga	Microvirga vignae	A0A0H1R452	Microvirga vignae.	269	1225564
ABC-type metal ion transport system| periplasmic component/surface antigen	Bacteria	Proteobacteria	Alphaproteobacteria	Rhizobiales	Methylobacteriaceae	Methylobacterium	Methylobacterium aquaticum	A0A0C6FTF7	Methylobacterium aquaticum.	262	270351
NLPA lipoprotein	Bacteria	Proteobacteria	Alphaproteobacteria	Rhizobiales	Methylobacteriaceae	Methylobacterium	Methylobacterium oryzae CBMB20	A0A089P3K7	Methylobacterium oryzae CBMB20.	266	693986
Lipoprotein	Bacteria	Proteobacteria	Alphaproteobacteria	Rhizobiales	Methylobacteriaceae	Methylobacterium	Methylobacterium oryzae CBMB20	A0A089NNC0	Methylobacterium oryzae CBMB20.	266	693986
D-methionine transport system substrate-binding protein	Bacteria	Proteobacteria	Alphaproteobacteria	Rhizobiales	Hyphomicrobiaceae	Aquabacter	Aquabacter spiritensis	A0A4R3LX07	Aquabacter spiritensis.	259	933073
Lipoprotein	Bacteria	Proteobacteria	Alphaproteobacteria	Rhizobiales	Hyphomicrobiaceae	Rhodoplanes	Rhodoplanes piscinae	A0A3S4B2L8	Rhodoplanes piscinae.	273	444923
Lipoprotein	Bacteria	Proteobacteria	Alphaproteobacteria	Rhizobiales	Hyphomicrobiaceae	Pelagibacterium	Pelagibacterium sp. XYN52	A0A369VZU9	Pelagibacterium sp. XYN52.	271	2282655
Metal ABC transporter substrate-binding protein	Bacteria	Proteobacteria	Alphaproteobacteria	Rhizobiales	Hyphomicrobiaceae	Blastochloris	Blastochloris tepida	A0A348G1M8	Blastochloris sp. GI.	258	2233851
Lipoprotein	Bacteria	Proteobacteria	Alphaproteobacteria	Rhizobiales	Hyphomicrobiaceae	Blastochloris	Blastochloris tepida	A0A348G1M7	Blastochloris sp. GI.	276	2233851
Uncharacterized protein	Bacteria	Proteobacteria	Alphaproteobacteria	Rhizobiales	Hyphomicrobiaceae	Blastochloris	Blastochloris tepida	A0A348G0B7	Blastochloris sp. GI.	271	2233851
Lipoprotein	Bacteria	Proteobacteria	Alphaproteobacteria	Rhizobiales	Hyphomicrobiaceae	Rhodoplanes	Rhodoplanes roseus	A0A327L160	Rhodoplanes roseus.	268	29409
D-methionine transport system substrate-binding protein	Bacteria	Proteobacteria	Alphaproteobacteria	Rhizobiales	Hyphomicrobiaceae	Devosia	Devosia crocina	A0A1I7NQV7	Devosia crocina.	261	429728
Metal ABC transporter substrate-binding protein	Bacteria	Proteobacteria	Alphaproteobacteria	Rhizobiales	Hyphomicrobiaceae	Pelagibacterium	Pelagibacterium sp. SCN 63-23	A0A1E4F496	Pelagibacterium sp. SCN 63-23.	261	1660124
Uncharacterized protein	Bacteria	Proteobacteria	Alphaproteobacteria	Rhizobiales	Hyphomicrobiaceae	Devosia	Devosia sp. Root685	A0A0Q8IZF1	Devosia sp. Root685.	261	1736587
Lipoprotein	Bacteria	Proteobacteria	Alphaproteobacteria	Rhizobiales	Hyphomicrobiaceae	Prosthecomicrobium	Prosthecomicrobium hirschii	A0A0P6WDX6	Prosthecomicrobium hirschii.	267	665126
D-methionine-binding lipoprotein metQ	Bacteria	Proteobacteria	Alphaproteobacteria	Rhizobiales	Hyphomicrobiaceae	Blastochloris	Blastochloris viridis	A0A0H5BIM1	Blastochloris viridis	259	1079
D-methionine-binding lipoprotein metQ	Bacteria	Proteobacteria	Alphaproteobacteria	Rhizobiales	Hyphomicrobiaceae	Blastochloris	Blastochloris viridis	A0A0H5BEV9	Blastochloris viridis	261	1079
Lipoprotein	Bacteria	Proteobacteria	Alphaproteobacteria	Rhizobiales	Hyphomicrobiaceae	Blastochloris	Blastochloris viridis	A0A0H5BE89	Blastochloris viridis	280	1079
D-methionine-binding lipoprotein metQ	Bacteria	Proteobacteria	Alphaproteobacteria	Rhizobiales	Hyphomicrobiaceae	Blastochloris	Blastochloris viridis	A0A0H5BBS6	Blastochloris viridis	258	1079
Lipoprotein	Bacteria	Proteobacteria	Alphaproteobacteria	Rhizobiales	Hyphomicrobiaceae	Devosia	Devosia epidermidihirudinis	A0A0F5QDM8	Devosia epidermidihirudinis.	268	1293439
ABC-type metal ion transport system| substrate-binding protein/surface antigen	Bacteria	Proteobacteria	Alphaproteobacteria	Rhodospirillales	Geminicoccaceae	Arboricoccus	Arboricoccus pini	A0A212RFR5	Arboricoccus pini.	315	1963835
D-methionine transport system substrate-binding protein	Bacteria	Proteobacteria	Alphaproteobacteria	Rhizobiales	Cohaesibacteraceae	Breoghania	Breoghania corrubedonensis	A0A2T5US50	Breoghania corrubedonensis.	260	665038
D-methionine transport system substrate-binding protein	Bacteria	Proteobacteria	Alphaproteobacteria	Rhizobiales	Chelatococcaceae	Camelimonas	Camelimonas lactis	A0A4R2GXJ2	Camelimonas lactis.	282	659006
D-methionine transport system substrate-binding protein	Bacteria	Proteobacteria	Alphaproteobacteria	Rhizobiales	Chelatococcaceae	Camelimonas	Camelimonas lactis	A0A4R2GLH7	Camelimonas lactis.	256	659006
Lipoprotein	Bacteria	Proteobacteria	Alphaproteobacteria	Rhizobiales	Chelatococcaceae	Camelimonas	Camelimonas lactis	A0A4R2GKT3	Camelimonas lactis.	278	659006
Metal ABC transporter substrate-binding protein	Bacteria	Proteobacteria	Alphaproteobacteria	Rhizobiales	Chelatococcaceae	Chelatococcus	Chelatococcus sp.	A0A2W6YUQ5	Chelatococcus sp.	264	1953771
Iron ABC transporter substrate-binding protein	Bacteria	Proteobacteria	Alphaproteobacteria	Rhizobiales	Chelatococcaceae	Chelatococcus	Chelatococcus sp.	A0A2W6YQX5	Chelatococcus sp.	269	1953771
D-methionine transport system substrate-binding protein	Bacteria	Proteobacteria	Alphaproteobacteria	Rhizobiales	Chelatococcaceae	Chelatococcus	Chelatococcus asaccharovorans	A0A2V3UA34	Chelatococcus asaccharovorans.	262	28210
Lipoprotein	Bacteria	Proteobacteria	Alphaproteobacteria	Rhizobiales	Chelatococcaceae	Chelatococcus	Chelatococcus sp. CO-6	A0A0K2DAZ5	Chelatococcus sp. CO-6.	268	1702325
Dioxygenase	Bacteria	Proteobacteria	Alphaproteobacteria	Rhizobiales	Chelatococcaceae	Chelatococcus	Chelatococcus sp. CO-6	A0A0K2DAF8	Chelatococcus sp. CO-6.	260	1702325
Methionine ABC transporter substrate-binding protein	Bacteria	Proteobacteria	Alphaproteobacteria	Caulobacterales	Caulobacteraceae	Asticcacaulis	Asticcacaulis benevestitus DSM 16100 = ATCC BAA-89	V4PFX0	Asticcacaulis benevestitus DSM 16100 = ATCC BAA-896.	264	1121022	y
Methionine ABC transporter substrate-binding protein	Bacteria	Proteobacteria	Alphaproteobacteria	Caulobacterales	Caulobacteraceae	Asticcacaulis	Asticcacaulis sp. AC466	V4PB02	Asticcacaulis sp. AC466.	264	1282362	y
Lipoprotein	Bacteria	Proteobacteria	Alphaproteobacteria	Caulobacterales	Caulobacteraceae	Caulobacter	Caulobacter vibrioides OR37	R0EJG3	Caulobacter vibrioides OR37.	268	1292034	y
Lipoprotein	Bacteria	Proteobacteria	Alphaproteobacteria	Caulobacterales	Caulobacteraceae	Caulobacter	Caulobacter sp. AP07	J3A7F6	Caulobacter sp. AP07.	266	1144304	y
NLPA lipofamily protein	Bacteria	Proteobacteria	Alphaproteobacteria	Caulobacterales	Caulobacteraceae	Asticcacaulis	Asticcacaulis biprosthecum C19	F4QRQ3	Asticcacaulis biprosthecum C19.	263	715226	y
Lipoprotein	Bacteria	Proteobacteria	Alphaproteobacteria	Caulobacterales	Caulobacteraceae	Asticcacaulis	Asticcacaulis excentricus CB 48	E8RTZ5	Asticcacaulis excentricus (strain ATCC 15261 / DSM 4724 / VKM B-1370 / CB48)	265	573065	y
Lipoprotein	Bacteria	Proteobacteria	Alphaproteobacteria	Caulobacterales	Caulobacteraceae	Brevundimonas	Brevundimonas subvibrioides ATCC 15264	D9QJC1	Brevundimonas subvibrioides (strain ATCC 15264 / DSM 4735 / LMG 14903 /NBRC 16000 / CB 81)	267	633149	y
Lipoprotein	Bacteria	Proteobacteria	Alphaproteobacteria	Caulobacterales	Caulobacteraceae	Caulobacter	Caulobacter segnis ATCC 21756	D5VIH0	Caulobacter segnis (strain ATCC 21756 / DSM 7131 / JCM 7823 / NBRC 15250 /LMG 17158 / TK0059)	273	509190	y
Lipoprotein	Bacteria	Proteobacteria	Alphaproteobacteria	Caulobacterales	Caulobacteraceae	Caulobacter	Caulobacter sp. K31	B0T8X4	Caulobacter sp. (strain K31)	265	366602	y
Lipoprotein	Bacteria	Proteobacteria	Alphaproteobacteria	Caulobacterales	Caulobacteraceae	Brevundimonas	Brevundimonas sp.	A0A519L5R4	Brevundimonas sp.	272	1871086	y
Lipoprotein	Bacteria	Proteobacteria	Alphaproteobacteria	Caulobacterales	Caulobacteraceae	Brevundimonas	Brevundimonas sp. S30B	A0A4Y9RI45	Brevundimonas sp. S30B.	268	2561925	y
Lipoprotein	Bacteria	Proteobacteria	Alphaproteobacteria	Caulobacterales	Caulobacteraceae	Brevundimonas	Brevundimonas vancanneytii	A0A4P1K6C6	Brevundimonas vancanneytii.	269	1325724	y
Lipoprotein	Bacteria	Proteobacteria	Alphaproteobacteria	Caulobacterales	Caulobacteraceae	Caulobacter	Caulobacter sp. 602-1	A0A426GR27	Caulobacter sp. 602-1.	268	2492472	y
Methionine ABC transporter substrate-binding protein	Bacteria	Proteobacteria	Alphaproteobacteria	Caulobacterales	Caulobacteraceae	Brevundimonas	Brevundimonas sp.	A0A354EPY1	Brevundimonas sp.	264	1871086	y
Lipoprotein	Bacteria	Proteobacteria	Alphaproteobacteria	Caulobacterales	Caulobacteraceae	Brevundimonas	Brevundimonas sp.	A0A2W6RND0	Brevundimonas sp.	268	1871086	y
Lipoprotein	Bacteria	Proteobacteria	Alphaproteobacteria	Caulobacterales	Caulobacteraceae	Brevundimonas	Brevundimonas sp. MYb31	A0A2S8W6N3	Brevundimonas sp. MYb31.	269	1848616	y
Lipoprotein	Bacteria	Proteobacteria	Alphaproteobacteria	Caulobacterales	Caulobacteraceae	Caulobacter	Caulobacter sp. HMWF025	A0A2R7LEL4	Caulobacter sp. HMWF025.	274	2056860	y
Lipoprotein	Bacteria	Proteobacteria	Alphaproteobacteria	Caulobacterales	Caulobacteraceae	Caulobacter	Caulobacter sp. FWC2	A0A2G5QVU1	Caulobacter sp. FWC2.	267	69664	y
Lipoprotein	Bacteria	Proteobacteria	Alphaproteobacteria	Caulobacterales	Caulobacteraceae	Caulobacter	Caulobacter mirabilis	A0A2D2B2U3	Caulobacter mirabilis.	271	69666	y
Lipoprotein	Bacteria	Proteobacteria	Alphaproteobacteria	Caulobacterales	Caulobacteraceae	Brevundimonas	Brevundimonas subvibrioides	A0A258HII2	Brevundimonas subvibrioides.	267	74313	y
Lipoprotein	Bacteria	Proteobacteria	Alphaproteobacteria	Caulobacterales	Caulobacteraceae	Brevundimonas	Brevundimonas subvibrioides	A0A258FPE3	Brevundimonas subvibrioides.	266	74313	y
Lipoprotein	Bacteria	Proteobacteria	Alphaproteobacteria	Caulobacterales	Caulobacteraceae	Brevundimonas	Brevundimonas viscosa	A0A1I6S7G1	Brevundimonas viscosa.	265	871741	y
Lipoprotein	Bacteria	Proteobacteria	Alphaproteobacteria	Caulobacterales	Caulobacteraceae	Caulobacter	Caulobacter vibrioides	A0A0V2F894	Caulobacter vibrioides	267	155892	y
Lipoprotein	Bacteria	Proteobacteria	Alphaproteobacteria	Caulobacterales	Caulobacteraceae	Phenylobacterium	Phenylobacterium sp. Root77	A0A0Q8U7B7	Phenylobacterium sp. Root77.	267	1736599	y
Lipoprotein	Bacteria	Proteobacteria	Alphaproteobacteria	Caulobacterales	Caulobacteraceae	Phenylobacterium	Phenylobacterium sp. Root700	A0A0Q8MP22	Phenylobacterium sp. Root700.	267	1736591	y
Lipoprotein	Bacteria	Proteobacteria	Alphaproteobacteria	Caulobacterales	Caulobacteraceae	Brevundimonas	Brevundimonas sp. Root1423	A0A0Q7TGS5	Brevundimonas sp. Root1423.	268	1736462	y
Lipoprotein	Bacteria	Proteobacteria	Alphaproteobacteria	Caulobacterales	Caulobacteraceae	Brevundimonas	Brevundimonas sp. Root1279	A0A0Q7E383	Brevundimonas sp. Root1279.	268	1736443	y
Lipoprotein	Bacteria	Proteobacteria	Alphaproteobacteria	Caulobacterales	Caulobacteraceae	Caulobacter	Caulobacter sp. Root342	A0A0Q6TTW9	Caulobacter sp. Root342.	268	1736519	y
Lipoprotein	Bacteria	Proteobacteria	Alphaproteobacteria	Caulobacterales	Caulobacteraceae	Caulobacter	Caulobacter henricii	A0A0P0P4D5	Caulobacter henricii.	269	69395	y
Lipoprotein	Bacteria	Proteobacteria	Alphaproteobacteria	Caulobacterales	Caulobacteraceae	Caulobacter	Caulobacter vibrioides NA1000	A0A0H3CD03	Caulobacter vibrioides (strain NA1000 / CB15N)	270	565050	y
Lipoprotein	Bacteria	Proteobacteria	Alphaproteobacteria	Holosporales	Candidatus Paracaedibacte	Candidatus Finniella	Candidatus Finniella inopinata	A0A4Q7DKY1	Candidatus Finniella inopinata.	271	1696036
Dioxygenase	Bacteria	Proteobacteria	Alphaproteobacteria	Holosporales	Candidatus Paracaedibacte	Candidatus Paracaedibacter	Candidatus Paracaedibacter acanthamoebae	A0A077AW15	Candidatus Paracaedibacter acanthamoebae.	250	91604
Uncharacterized protein	Bacteria	Proteobacteria	Alphaproteobacteria	Holosporales	Caedimonadaceae	Candidatus Nucleicultrix	Candidatus Nucleicultrix amoebiphila FS5	A0A1W6N430	Candidatus Nucleicultrix amoebiphila FS5.	264	1414854	y
Lipoprotein	Bacteria	Proteobacteria	Alphaproteobacteria	Rhizobiales	Brucellaceae	Ochrobactrum	Ochrobactrum intermedium LMG 3301	C4WEM3	Ochrobactrum intermedium LMG 3301.	293	641118
Lipoprotein	Bacteria	Proteobacteria	Alphaproteobacteria	Rhizobiales	Brucellaceae	Brucella	Brucella melitensis ATCC 23457	C0RMA5	Brucella melitensis biotype 2 (strain ATCC 23457)	278	546272
Lipoprotein	Bacteria	Proteobacteria	Alphaproteobacteria	Rhizobiales	Brucellaceae	Brucella	Brucella ceti str. Cudo	C0G3C5	Brucella ceti str. Cudo.	268	595497
Lipoprotein	Bacteria	Proteobacteria	Alphaproteobacteria	Rhizobiales	Brucellaceae	Ochrobactrum	Ochrobactrum anthropi ATCC 49188	A6X5J4	Ochrobactrum anthropi (strain ATCC 49188 / DSM 6882 / JCM 21032 / NBRC15819 / NCTC 12168)	265	439375
Iron ABC transporter substrate-binding protein	Bacteria	Proteobacteria	Alphaproteobacteria	Rhizobiales	Brucellaceae	Ochrobactrum	Ochrobactrum quorumnocens	A0A5N1JW47	Ochrobactrum quorumnocens.	280	271865
Iron ABC transporter substrate-binding protein	Bacteria	Proteobacteria	Alphaproteobacteria	Rhizobiales	Brucellaceae	Ochrobactrum	Ochrobactrum gallinifaecis	A0A502BQ32	Ochrobactrum gallinifaecis.	281	215590
D-methionine transport system substrate-binding protein	Bacteria	Proteobacteria	Alphaproteobacteria	Rhizobiales	Brucellaceae	Ochrobactrum	Ochrobactrum sp. LP_5_YM	A0A4R7WVD6	Ochrobactrum sp. LP_5_YM.	280	2485134
Lipoprotein	Bacteria	Proteobacteria	Alphaproteobacteria	Rhizobiales	Brucellaceae	Pseudochrobactrum	Pseudochrobactrum asaccharolyticum	A0A366DVV5	Pseudochrobactrum asaccharolyticum.	283	354351
Lipoprotein	Bacteria	Proteobacteria	Alphaproteobacteria	Rhizobiales	Brucellaceae	Falsochrobactrum	Falsochrobactrum ovis	A0A364JUJ1	Falsochrobactrum ovis.	278	1293442
Lipoprotein	Bacteria	Proteobacteria	Alphaproteobacteria	Rhizobiales	Brucellaceae	Falsochrobactrum	Falsochrobactrum sp. HN4	A0A316J777	Falsochrobactrum sp. HN4.	278	2201899
Lipoprotein	Bacteria	Proteobacteria	Alphaproteobacteria	Rhizobiales	Brucellaceae	Mycoplana	Mycoplana dimorpha	A0A2T5B8W7	Mycoplana dimorpha.	282	28320
NLPA lipofamily protein	Bacteria	Proteobacteria	Alphaproteobacteria	Rhizobiales	Brucellaceae	Ochrobactrum	Ochrobactrum pseudogrignonense	A0A256GDY1	Ochrobactrum pseudogrignonense.	297	419475
NLPA lipofamily protein	Bacteria	Proteobacteria	Alphaproteobacteria	Rhizobiales	Brucellaceae	Ochrobactrum	Ochrobactrum rhizosphaerae	A0A256FHS8	Ochrobactrum rhizosphaerae.	280	571254
NLPA lipofamily protein	Bacteria	Proteobacteria	Alphaproteobacteria	Rhizobiales	Brucellaceae	Ochrobactrum	Ochrobactrum quorumnocens	A0A248ULG8	Ochrobactrum quorumnocens.	280	271865
Metal ABC transporter substrate-binding protein	Bacteria	Proteobacteria	Alphaproteobacteria	Rhizobiales	Brucellaceae	Ochrobactrum	Ochrobactrum sp. P6BS-III	A0A1V3YMH0	Ochrobactrum sp. P6BS-III.	259	1920636
Metal ABC transporter substrate-binding protein	Bacteria	Proteobacteria	Alphaproteobacteria	Rhizobiales	Brucellaceae	Ochrobactrum	Ochrobactrum pseudogrignonense	A0A1A9FSH0	Ochrobactrum pseudogrignonense.	259	419475
Lipoprotein	Bacteria	Proteobacteria	Alphaproteobacteria	Rhizobiales	Brucellaceae	Ochrobactrum	Ochrobactrum pseudogrignonense	A0A1A9FQW0	Ochrobactrum pseudogrignonense.	265	419475
Lipoprotein	Bacteria	Proteobacteria	Alphaproteobacteria	Rhizobiales	Brucellaceae	Ochrobactrum	Ochrobactrum pseudogrignonense	A0A1A9FMV1	Ochrobactrum pseudogrignonense.	278	419475
YaeC family lipoprotein	Bacteria	Proteobacteria	Alphaproteobacteria	Rhizobiales	Bradyrhizobiaceae	Bradyrhizobium	Bradyrhizobium sp. DFCI-1	U1IIE6	Bradyrhizobium sp. DFCI-1.	277	1230476
YaeC family lipoprotein	Bacteria	Proteobacteria	Alphaproteobacteria	Rhizobiales	Bradyrhizobiaceae	Bradyrhizobium	Bradyrhizobium sp. DFCI-1	U1HIT4	Bradyrhizobium sp. DFCI-1.	258	1230476
YaeC family lipoprotein	Bacteria	Proteobacteria	Alphaproteobacteria	Rhizobiales	Bradyrhizobiaceae	Bradyrhizobium	Bradyrhizobium sp. DFCI-1	U1HFC1	Bradyrhizobium sp. DFCI-1.	260	1230476
Possible lipoprotein	Bacteria	Proteobacteria	Alphaproteobacteria	Rhizobiales	Bradyrhizobiaceae	Rhodopseudomonas	Rhodopseudomonas palustris CGA009	Q6N9V8	Rhodopseudomonas palustris (strain ATCC BAA-98 / CGA009)	257	258594
Putative outer membrane protein	Bacteria	Proteobacteria	Alphaproteobacteria	Rhizobiales	Bradyrhizobiaceae	Rhodopseudomonas	Rhodopseudomonas palustris CGA009	Q6N9V6	Rhodopseudomonas palustris (strain ATCC BAA-98 / CGA009)	261	258594
Lipoprotein	Bacteria	Proteobacteria	Alphaproteobacteria	Rhizobiales	Bradyrhizobiaceae	Rhodopseudomonas	Rhodopseudomonas palustris CGA009	Q6N799	Rhodopseudomonas palustris (strain ATCC BAA-98 / CGA009)	289	258594
NLPA lipoprotein	Bacteria	Proteobacteria	Alphaproteobacteria	Rhizobiales	Bradyrhizobiaceae	Rhodopseudomonas	Rhodopseudomonas palustris BisB18	Q21BU9	Rhodopseudomonas palustris (strain BisB18)	263	316056
Lipoprotein YaeC	Bacteria	Proteobacteria	Alphaproteobacteria	Rhizobiales	Bradyrhizobiaceae	Rhodopseudomonas	Rhodopseudomonas palustris BisB18	Q21BU6	Rhodopseudomonas palustris (strain BisB18)	258	316056
NLPA lipoprotein	Bacteria	Proteobacteria	Alphaproteobacteria	Rhizobiales	Bradyrhizobiaceae	Rhodopseudomonas	Rhodopseudomonas palustris BisB5	Q134P3	Rhodopseudomonas palustris (strain BisB5)	260	316057
NLPA lipoprotein	Bacteria	Proteobacteria	Alphaproteobacteria	Rhizobiales	Bradyrhizobiaceae	Rhodopseudomonas	Rhodopseudomonas palustris BisA53	Q07LR9	Rhodopseudomonas palustris (strain BisA53)	261	316055
Lipoprotein	Bacteria	Proteobacteria	Alphaproteobacteria	Rhizobiales	Bradyrhizobiaceae	Bradyrhizobium	Bradyrhizobium sp. YR681	J3HXY1	Bradyrhizobium sp. YR681.	287	1144344
NLPA lipoprotein	Bacteria	Proteobacteria	Alphaproteobacteria	Rhizobiales	Bradyrhizobiaceae	Rhodopseudomonas	Rhodopseudomonas palustris TIE-1	B3QH03	Rhodopseudomonas palustris (strain TIE-1)	271	395960
D-methionine ABC transporter protein| periplasmic binding protein	Bacteria	Proteobacteria	Alphaproteobacteria	Rhizobiales	Bradyrhizobiaceae	Bradyrhizobium	Bradyrhizobium sp. BTAi1	A5EL35	Bradyrhizobium sp. (strain BTAi1 / ATCC BAA-1182)	260	288000
D-methionine ABC transporter protein| periplasmic binding protein	Bacteria	Proteobacteria	Alphaproteobacteria	Rhizobiales	Bradyrhizobiaceae	Bradyrhizobium	Bradyrhizobium sp. BTAi1	A5EGW1	Bradyrhizobium sp. (strain BTAi1 / ATCC BAA-1182)	259	288000
Putative D-methionine ABC transporter| perisplasmic binding lipoprotein	Bacteria	Proteobacteria	Alphaproteobacteria	Rhizobiales	Bradyrhizobiaceae	Bradyrhizobium	Bradyrhizobium sp. BTAi1	A5EGV1	Bradyrhizobium sp. (strain BTAi1 / ATCC BAA-1182)	275	288000
D-methionine ABC transporter protein| periplasmic binding protein	Bacteria	Proteobacteria	Alphaproteobacteria	Rhizobiales	Bradyrhizobiaceae	Bradyrhizobium	Bradyrhizobium sp. ORS 278	A4YVV8	Bradyrhizobium sp. (strain ORS 278)	258	114615
Putative D-methionine ABC transporter| perisplasmic binding lipoprotein (MetQ-like)	Bacteria	Proteobacteria	Alphaproteobacteria	Rhizobiales	Bradyrhizobiaceae	Bradyrhizobium	Bradyrhizobium sp. ORS 278	A4YVV1	Bradyrhizobium sp. (strain ORS 278)	275	114615
MetQ/NlpA family ABC transporter substrate-binding protein	Bacteria	Proteobacteria	Alphaproteobacteria	Rhizobiales	Bradyrhizobiaceae	Afipia	Afipia sp.	A0A5C8CBA0	Afipia sp.	258	1871052
Lipoprotein	Bacteria	Proteobacteria	Alphaproteobacteria	Rhizobiales	Bradyrhizobiaceae	Afipia	Afipia sp.	A0A5C8CAX5	Afipia sp.	266	1871052
Lipoprotein	Bacteria	Proteobacteria	Alphaproteobacteria	Rhizobiales	Bradyrhizobiaceae	Afipia	Afipia sp.	A0A5C8C6X2	Afipia sp.	275	1871052
Lipoprotein	Bacteria	Proteobacteria	Alphaproteobacteria	Rhizobiales	Bradyrhizobiaceae	Bosea	Bosea sp. F3-2	A0A5C1B1V5	Bosea sp. F3-2.	266	2599640
Lipoprotein	Bacteria	Proteobacteria	Alphaproteobacteria	Rhizobiales	Bradyrhizobiaceae	Bosea	Bosea sp. AK1	A0A542B8T7	Bosea sp. AK1.	266	2587160
MetQ/NlpA family ABC transporter substrate-binding protein	Bacteria	Proteobacteria	Alphaproteobacteria	Rhizobiales	Bradyrhizobiaceae	Bradyrhizobium	Bradyrhizobium sp.	A0A525J3Z6	Bradyrhizobium sp.	260	376
Methionine-binding protein	Bacteria	Proteobacteria	Alphaproteobacteria	Rhizobiales	Bradyrhizobiaceae	Bradyrhizobium	Bradyrhizobium sp. 58S1	A0A516J7Z8	Bradyrhizobium sp. 58S1.	271	1404864
Methionine-binding protein	Bacteria	Proteobacteria	Alphaproteobacteria	Rhizobiales	Bradyrhizobiaceae	Tardiphaga	Tardiphaga sp. vice352	A0A515KGU7	Tardiphaga sp. vice352.	269	2592816
MetQ/NlpA family ABC transporter substrate-binding protein	Bacteria	Proteobacteria	Alphaproteobacteria	Rhizobiales	Bradyrhizobiaceae	Tardiphaga	Tardiphaga sp. vice352	A0A515KGQ7	Tardiphaga sp. vice352.	260	2592816
Lipoprotein 28	Bacteria	Proteobacteria	Alphaproteobacteria	Rhizobiales	Bradyrhizobiaceae	Bradyrhizobium	Bradyrhizobium sp. CI-1B	A0A508T635	Bradyrhizobium sp. CI-1B.	272	2511166
D-methionine-binding lipoprotein MetQ	Bacteria	Proteobacteria	Alphaproteobacteria	Rhizobiales	Bradyrhizobiaceae	Bradyrhizobium	Bradyrhizobium sp. CI-1B	A0A508T618	Bradyrhizobium sp. CI-1B.	265	2511166
MetQ/NlpA family ABC transporter substrate-binding protein	Bacteria	Proteobacteria	Alphaproteobacteria	Rhizobiales	Bradyrhizobiaceae	unclassified Bradyrhizobiaceae	Bradyrhizobiaceae bacterium	A0A4V1ZM55	Bradyrhizobiaceae bacterium.	264	2072420
D-methionine-binding lipoprotein MetQ	Bacteria	Proteobacteria	Alphaproteobacteria	Rhizobiales	Bradyrhizobiaceae	Bradyrhizobium	Bradyrhizobium sp. CI-41S	A0A4U9CRC1	Bradyrhizobium sp. CI-41S.	265	2511167
Metal ABC transporter substrate-binding protein	Bacteria	Proteobacteria	Alphaproteobacteria	Rhizobiales	Bradyrhizobiaceae	Bradyrhizobium	Bradyrhizobium sp. Leo170	A0A4Q8R1G7	Bradyrhizobium sp. Leo170.	258	1571199
Methionine-binding protein	Bacteria	Proteobacteria	Alphaproteobacteria	Rhizobiales	Bradyrhizobiaceae	Bradyrhizobium	Bradyrhizobium sp. Leo121	A0A4Q7FX91	Bradyrhizobium sp. Leo121.	271	1571195
Metal ABC transporter substrate-binding protein	Bacteria	Proteobacteria	Alphaproteobacteria	Rhizobiales	Bradyrhizobiaceae	Bradyrhizobium	Bradyrhizobium sp. Leo121	A0A4Q7FX55	Bradyrhizobium sp. Leo121.	260	1571195
MetQ/NlpA family ABC transporter substrate-binding protein	Bacteria	Proteobacteria	Alphaproteobacteria	Rhizobiales	Bradyrhizobiaceae	Bradyrhizobium	Bradyrhizobium guangdongense	A0A410V236	Bradyrhizobium guangdongense.	260	1325090
MetQ/NlpA family ABC transporter substrate-binding protein	Bacteria	Proteobacteria	Alphaproteobacteria	Rhizobiales	Bradyrhizobiaceae	unclassified Bradyrhizobiaceae	Bradyrhizobiaceae bacterium	A0A3S0N3V7	Bradyrhizobiaceae bacterium.	268	2072420
Lipoprotein	Bacteria	Proteobacteria	Alphaproteobacteria	Rhizobiales	Bradyrhizobiaceae	Bosea	Bosea sp. RCAM04685	A0A370KYW2	Bosea sp. RCAM04685.	266	2283844
D-methionine transport system substrate-binding protein	Bacteria	Proteobacteria	Alphaproteobacteria	Rhizobiales	Bradyrhizobiaceae	Rhodopseudomonas	Rhodopseudomonas faecalis	A0A318TXV7	Rhodopseudomonas faecalis.	257	99655
D-methionine transport system substrate-binding protein	Bacteria	Proteobacteria	Alphaproteobacteria	Rhizobiales	Bradyrhizobiaceae	Rhodopseudomonas	Rhodopseudomonas faecalis	A0A318TG34	Rhodopseudomonas faecalis.	261	99655
Lipoprotein	Bacteria	Proteobacteria	Alphaproteobacteria	Rhizobiales	Bradyrhizobiaceae	Afipia	Afipia broomeae	A0A2M8ZEI4	Afipia broomeae.	277	56946
D-methionine transport system substrate-binding protein	Bacteria	Proteobacteria	Alphaproteobacteria	Rhizobiales	Bradyrhizobiaceae	Afipia	Afipia broomeae	A0A2M8ZEG9	Afipia broomeae.	272	56946
D-methionine transport system substrate-binding protein	Bacteria	Proteobacteria	Alphaproteobacteria	Rhizobiales	Bradyrhizobiaceae	Afipia	Afipia broomeae	A0A2M8ZEF8	Afipia broomeae.	273	56946
Methionine ABC transporter substrate-binding protein	Bacteria	Proteobacteria	Alphaproteobacteria	Rhizobiales	Bradyrhizobiaceae	Bradyrhizobium	Bradyrhizobium sp. C9	A0A2A6NEZ0	Bradyrhizobium sp. C9.	264	142585
Metal ABC transporter substrate-binding protein	Bacteria	Proteobacteria	Alphaproteobacteria	Rhizobiales	Bradyrhizobiaceae	unclassified Bradyrhizobiaceae	Bradyrhizobiaceae bacterium PARB1	A0A257KYA3	Bradyrhizobiaceae bacterium PARB1.	253	2015576
Lipoprotein	Bacteria	Proteobacteria	Alphaproteobacteria	Rhizobiales	Bradyrhizobiaceae	unclassified Bradyrhizobiaceae	Bradyrhizobiaceae bacterium PARB1	A0A257KXM3	Bradyrhizobiaceae bacterium PARB1.	269	2015576
Dioxygenase	Bacteria	Proteobacteria	Alphaproteobacteria	Rhizobiales	Bradyrhizobiaceae	Bradyrhizobium	Bradyrhizobium sp. NAS80.1	A0A1Q5SVF9	Bradyrhizobium sp. NAS80.1.	260	1680159
Lipoprotein	Bacteria	Proteobacteria	Alphaproteobacteria	Rhizobiales	Bradyrhizobiaceae	Bosea	Bosea sp. TND4EK4	A0A1N7BTL8	Bosea sp. TND4EK4.	266	1907408
D-methionine transport system substrate-binding protein	Bacteria	Proteobacteria	Alphaproteobacteria	Rhizobiales	Bradyrhizobiaceae	Bradyrhizobium	Bradyrhizobium erythrophlei	A0A1M7T9J7	Bradyrhizobium erythrophlei.	260	1437360
D-methionine transport system substrate-binding protein	Bacteria	Proteobacteria	Alphaproteobacteria	Rhizobiales	Bradyrhizobiaceae	Bradyrhizobium	Bradyrhizobium erythrophlei	A0A1M5M4I0	Bradyrhizobium erythrophlei.	260	1437360
D-methionine transport system substrate-binding protein	Bacteria	Proteobacteria	Alphaproteobacteria	Rhizobiales	Bradyrhizobiaceae	Bradyrhizobium	Bradyrhizobium arachidis	A0A1I7J3S2	Bradyrhizobium arachidis.	286	858423
Lipoprotein	Bacteria	Proteobacteria	Alphaproteobacteria	Rhizobiales	Bradyrhizobiaceae	Bradyrhizobium	Bradyrhizobium arachidis	A0A1I7J346	Bradyrhizobium arachidis.	269	858423
Lipoprotein	Bacteria	Proteobacteria	Alphaproteobacteria	Rhizobiales	Bradyrhizobiaceae	Bosea	Bosea lupini	A0A1H7R212	Bosea lupini.	265	1036779
D-methionine transport system substrate-binding protein	Bacteria	Proteobacteria	Alphaproteobacteria	Rhizobiales	Bradyrhizobiaceae	Bradyrhizobium	Bradyrhizobium erythrophlei	A0A1H4UF19	Bradyrhizobium erythrophlei.	242	1437360
D-methionine transport system substrate-binding protein	Bacteria	Proteobacteria	Alphaproteobacteria	Rhizobiales	Bradyrhizobiaceae	Bradyrhizobium	Bradyrhizobium canariense	A0A1H1T3Y2	Bradyrhizobium canariense.	258	255045
Lipoprotein	Bacteria	Proteobacteria	Alphaproteobacteria	Rhizobiales	Bradyrhizobiaceae	Bosea	Bosea vaviloviae	A0A1D7TZA7	Bosea vaviloviae.	266	1526658
Lipoprotein	Bacteria	Proteobacteria	Alphaproteobacteria	Rhizobiales	Bradyrhizobiaceae	Bosea	Bosea sp. RAC05	A0A1B3NRB5	Bosea sp. RAC05.	266	1842539
Methionine ABC transporter substrate-binding protein	Bacteria	Proteobacteria	Alphaproteobacteria	Rhizobiales	Bradyrhizobiaceae	Tardiphaga	Tardiphaga robiniae	A0A163ZSL4	Tardiphaga robiniae.	260	943830
Methionine-binding protein	Bacteria	Proteobacteria	Alphaproteobacteria	Rhizobiales	Bradyrhizobiaceae	Tardiphaga	Tardiphaga robiniae	A0A163ZSF2	Tardiphaga robiniae.	271	943830
Lipoprotein	Bacteria	Proteobacteria	Alphaproteobacteria	Rhizobiales	Bradyrhizobiaceae	Tardiphaga	Tardiphaga robiniae	A0A161SK93	Tardiphaga robiniae.	269	943830
Methionine ABC transporter substratebinding protein	Bacteria	Proteobacteria	Alphaproteobacteria	Rhizobiales	Bradyrhizobiaceae	Bradyrhizobium	Bradyrhizobium sp.	A0A160UH10	Bradyrhizobium sp.	240	376
Lipoprotein	Bacteria	Proteobacteria	Alphaproteobacteria	Rhizobiales	Bradyrhizobiaceae	Bosea	Bosea sp. PAMC 26642	A0A126NZ84	Bosea sp. PAMC 26642.	266	1792307
Uncharacterized protein	Bacteria	Proteobacteria	Alphaproteobacteria	Rhizobiales	Bradyrhizobiaceae	Bosea	Bosea sp. WAO	A0A117MU86	Bosea sp. WAO.	262	406341
D-methionine-binding lipoprotein MetQ	Bacteria	Proteobacteria	Alphaproteobacteria	Rhizobiales	Bradyrhizobiaceae	Variibacter	Variibacter gotjawalensis	A0A0S3PUZ7	Variibacter gotjawalensis.	259	1333996
D-methionine-binding lipoprotein MetQ	Bacteria	Proteobacteria	Alphaproteobacteria	Rhizobiales	Bradyrhizobiaceae	Variibacter	Variibacter gotjawalensis	A0A0S3PUN3	Variibacter gotjawalensis.	259	1333996
Dioxygenase	Bacteria	Proteobacteria	Alphaproteobacteria	Rhizobiales	Bradyrhizobiaceae	Bradyrhizobium	Bradyrhizobium pachyrhizi	A0A0R3D3V8	Bradyrhizobium pachyrhizi.	258	280333
Lipoprotein	Bacteria	Proteobacteria	Alphaproteobacteria	Rhizobiales	Bradyrhizobiaceae	Bosea	Bosea sp. Root483D1	A0A0Q9J309	Bosea sp. Root483D1.	266	1736544
Uncharacterized protein	Bacteria	Proteobacteria	Alphaproteobacteria	Rhizobiales	Bradyrhizobiaceae	Bosea	Bosea sp. Root381	A0A0Q9II13	Bosea sp. Root381.	264	1736524
Lipoprotein	Bacteria	Proteobacteria	Alphaproteobacteria	Rhizobiales	Bradyrhizobiaceae	Bosea	Bosea sp. Root381	A0A0Q9I7G8	Bosea sp. Root381.	266	1736524
Uncharacterized protein	Bacteria	Proteobacteria	Alphaproteobacteria	Rhizobiales	Bradyrhizobiaceae	Bosea	Bosea sp. Leaf344	A0A0Q6KPX9	Bosea sp. Leaf344.	257	1736346
Lipoprotein	Bacteria	Proteobacteria	Alphaproteobacteria	Rhizobiales	Bradyrhizobiaceae	Bosea	Bosea thiooxidans	A0A0Q3IAW7	Bosea thiooxidans.	266	53254
Dioxygenase	Bacteria	Proteobacteria	Alphaproteobacteria	Rhizobiales	Bradyrhizobiaceae	Rhodopseudomonas	Rhodopseudomonas sp. AAP120	A0A0N1CAC5	Rhodopseudomonas sp. AAP120.	257	1523430
Methionine ABC transporter substrate-binding protein	Bacteria	Proteobacteria	Alphaproteobacteria	Rhizobiales	Bradyrhizobiaceae	Rhodopseudomonas	Rhodopseudomonas sp. AAP120	A0A0N0KH31	Rhodopseudomonas sp. AAP120.	261	1523430
Dioxygenase	Bacteria	Proteobacteria	Alphaproteobacteria	Rhizobiales	Bradyrhizobiaceae	Bradyrhizobium	Bradyrhizobium sp. LTSPM299	A0A0D7QBQ1	Bradyrhizobium sp. LTSPM299.	257	1619233
Methionine-binding protein	Bacteria	Proteobacteria	Alphaproteobacteria	Rhizobiales	Bradyrhizobiaceae	Bradyrhizobium	Bradyrhizobium sp. LTSP849	A0A0D7NN90	Bradyrhizobium sp. LTSP849.	271	1615890
Methionine ABC transporter substrate-binding protein	Bacteria	Proteobacteria	Alphaproteobacteria	Rhizobiales	Bradyrhizobiaceae	Bradyrhizobium	Bradyrhizobium sp. LTSP885	A0A0D7NDH0	Bradyrhizobium sp. LTSP885.	264	1619232
Methionine ABC transporter substrate-binding protein	Bacteria	Proteobacteria	Alphaproteobacteria	Rhizobiales	Bradyrhizobiaceae	Bradyrhizobium	Bradyrhizobium elkanii	A0A0D1NXK7	Bradyrhizobium elkanii.	264	29448
Dioxygenase	Bacteria	Proteobacteria	Alphaproteobacteria	Rhizobiales	Bradyrhizobiaceae	Bradyrhizobium	Bradyrhizobium elkanii	A0A0D1NJ65	Bradyrhizobium elkanii.	258	29448
Dioxygenase	Bacteria	Proteobacteria	Alphaproteobacteria	Rhizobiales	Bradyrhizobiaceae	Bradyrhizobium	Bradyrhizobium japonicum	A0A0A3XNN8	Bradyrhizobium japonicum.	257	375
Lipoprotein	Bacteria	Proteobacteria	Alphaproteobacteria	Rhizobiales	Bradyrhizobiaceae	Bosea	Bosea sp. LC85	A0A085FN09	Bosea sp. LC85.	266	1502851
Lipoprotein	Bacteria	Proteobacteria	Alphaproteobacteria	Rhizobiales	Beijerinckiaceae	Beijerinckia	Beijerinckia indica subsp. indica ATCC 9039	B2IIB0	Beijerinckia indica subsp. indica (strain ATCC 9039 / DSM 1715 / NCIB8712)	273	395963
Lipoprotein	Bacteria	Proteobacteria	Alphaproteobacteria	Rhizobiales	Bartonellaceae	Bartonella	Bartonella henselae	X5M8J1	Bartonella henselae	272	38323
Lipoprotein	Bacteria	Proteobacteria	Alphaproteobacteria	Rhizobiales	Bartonellaceae	Bartonella	Bartonella vinsonii subsp. berkhoffii str. Tweed	N6UQ92	Bartonella vinsonii subsp. berkhoffii str. Tweed.	272	1094502
Lipoprotein	Bacteria	Proteobacteria	Alphaproteobacteria	Rhizobiales	Bartonellaceae	Bartonella	Bartonella bovis 91-4	N6UM63	Bartonella bovis 91-4.	272	1094491
Lipoprotein	Bacteria	Proteobacteria	Alphaproteobacteria	Rhizobiales	Bartonellaceae	Bartonella	Bartonella australis Aust/NH1	M1P4V0	Bartonella australis (strain Aust/NH1)	272	1094489
Lipoprotein	Bacteria	Proteobacteria	Alphaproteobacteria	Rhizobiales	Bartonellaceae	Bartonella	Bartonella tamiae Th239	J1JWF9	Bartonella tamiae Th239.	272	1094558
Lipoprotein	Bacteria	Proteobacteria	Alphaproteobacteria	Rhizobiales	Bartonellaceae	Bartonella	Bartonella rattimassiliensis 15908	J1JJQ2	Bartonella rattimassiliensis 15908.	272	1094556
Lipoprotein	Bacteria	Proteobacteria	Alphaproteobacteria	Rhizobiales	Bartonellaceae	Bartonella	Bartonella washoeensis 085-0475	J1JFJ1	Bartonella washoeensis 085-0475.	294	1094564
Lipoprotein	Bacteria	Proteobacteria	Alphaproteobacteria	Rhizobiales	Bartonellaceae	Bartonella	Bartonella alsatica IBS 382	J0YN13	Bartonella alsatica IBS 382.	272	1094551
Lipoprotein	Bacteria	Proteobacteria	Alphaproteobacteria	Rhizobiales	Bartonellaceae	Bartonella	Bartonella sp. DB5-6	J0Q0N0	Bartonella sp. DB5-6.	272	1094755
Lipoprotein	Bacteria	Proteobacteria	Alphaproteobacteria	Rhizobiales	Bartonellaceae	Bartonella	Bartonella sp. AR 15-3	E6YQB8	Bartonella sp. AR 15-3.	272	545617
Lipoprotein	Bacteria	Proteobacteria	Alphaproteobacteria	Rhizobiales	Bartonellaceae	Bartonella	Bartonella tribocorum CIP 105476	A9IWW3	Bartonella tribocorum (strain CIP 105476 / IBS 506)	272	382640
Lipoprotein	Bacteria	Proteobacteria	Alphaproteobacteria	Rhizobiales	Bartonellaceae	Bartonella	Bartonella bacilliformis KC583	A1UTR1	Bartonella bacilliformis (strain ATCC 35685 / NCTC 12138 / KC583)	272	360095	y
Lipoprotein	Bacteria	Proteobacteria	Alphaproteobacteria	Rhizobiales	Bartonellaceae	Bartonella	Bartonella apis	A0A1U9MK11	Bartonella apis.	276	1686310
Lipoprotein	Bacteria	Proteobacteria	Alphaproteobacteria	Rhizobiales	Bartonellaceae	Bartonella	Bartonella sp. JB15	A0A1S6XGX3	Bartonella sp. JB15.	272	1933906
Lipoprotein	Bacteria	Proteobacteria	Alphaproteobacteria	Rhizobiales	Aurantimonadaceae	Aureimonas	Aureimonas sp. CAU 1482	A0A5B0DUS3	Aureimonas sp. CAU 1482.	275	2565783
MetQ/NlpA family ABC transporter substrate-binding protein	Bacteria	Proteobacteria	Alphaproteobacteria	Rhizobiales	Aurantimonadaceae	Martelella	Martelella sp. BGMRC2036	A0A506UBT1	Martelella sp. BGMRC2036.	259	2590451
MetQ/NlpA family ABC transporter substrate-binding protein	Bacteria	Proteobacteria	Alphaproteobacteria	Rhizobiales	Aurantimonadaceae	Martelella	Martelella sp. BGMRC2036	A0A506U7C0	Martelella sp. BGMRC2036.	259	2590451
D-methionine transport system substrate-binding protein	Bacteria	Proteobacteria	Alphaproteobacteria	Rhizobiales	Aurantimonadaceae	Martelella	Martelella mediterranea	A0A4V2V3Z3	Martelella mediterranea.	259	293089
D-methionine transport system substrate-binding protein	Bacteria	Proteobacteria	Alphaproteobacteria	Rhizobiales	Aurantimonadaceae	Martelella	Martelella mediterranea	A0A4R3NNH2	Martelella mediterranea.	262	293089
D-methionine transport system substrate-binding protein	Bacteria	Proteobacteria	Alphaproteobacteria	Rhizobiales	Aurantimonadaceae	Consotaella	Consotaella salsifontis	A0A1T4QY09	Consotaella salsifontis.	260	1365950
D-methionine transport system substrate-binding protein	Bacteria	Proteobacteria	Alphaproteobacteria	Rhizobiales	Aurantimonadaceae	Aureimonas	Aureimonas altamirensis DSM 21988	A0A1M6K857	Aureimonas altamirensis DSM 21988.	269	1121026
Dioxygenase	Bacteria	Proteobacteria	Alphaproteobacteria	Rhizobiales	Aurantimonadaceae	Aureimonas	Aureimonas ureilytica	A0A175RLE3	Aureimonas ureilytica.	267	401562
Lipoprotein	Bacteria	Proteobacteria	Alphaproteobacteria	Rhizobiales	Aurantimonadaceae	Aureimonas	Aureimonas ureilytica	A0A175R060	Aureimonas ureilytica.	280	401562
Uncharacterized protein	Bacteria	Proteobacteria	Alphaproteobacteria	Rhizobiales	Aurantimonadaceae	Aureimonas	Aureimonas sp. AU20	A0A0S2ETX1	Aureimonas sp. AU20.	267	1349819
Lipoprotein	Bacteria	Proteobacteria	Alphaproteobacteria	Rhizobiales	Aurantimonadaceae	Aureimonas	Aureimonas sp. AU20	A0A0S2EN87	Aureimonas sp. AU20.	277	1349819
Metal ABC transporter substrate-binding protein	Bacteria	Proteobacteria	Alphaproteobacteria	Rhizobiales	Aurantimonadaceae	Aureimonas	Aureimonas sp. Leaf427	A0A0Q6DTK3	Aureimonas sp. Leaf427.	267	1736375
Uncharacterized protein	Bacteria	Proteobacteria	Alphaproteobacteria	Rhizobiales	Aurantimonadaceae	Aureimonas	Aureimonas sp. Leaf427	A0A0Q6DHV3	Aureimonas sp. Leaf427.	268	1736375
Lipoprotein	Bacteria	Proteobacteria	Alphaproteobacteria	Rhizobiales	Aurantimonadaceae	Aureimonas	Aureimonas sp. Leaf427	A0A0Q6D188	Aureimonas sp. Leaf427.	278	1736375
Metal ABC transporter substrate-binding protein	Bacteria	Proteobacteria	Alphaproteobacteria	Rhizobiales	Aurantimonadaceae	Aureimonas	Aureimonas sp. Leaf427	A0A0Q6C3U3	Aureimonas sp. Leaf427.	267	1736375
Metal ABC transporter substrate-binding protein	Bacteria	Proteobacteria	Alphaproteobacteria	Rhizobiales	Aurantimonadaceae	Aureimonas	Aureimonas sp. Leaf324	A0A0Q5H1I8	Aureimonas sp. Leaf324.	267	1736336
Lipoprotein	Bacteria	Proteobacteria	Alphaproteobacteria	Rhizobiales	Aurantimonadaceae	Aureimonas	Aureimonas sp. Leaf324	A0A0Q5GZ15	Aureimonas sp. Leaf324.	273	1736336
Dioxygenase	Bacteria	Proteobacteria	Alphaproteobacteria	Rhizobiales	Aurantimonadaceae	Martelella	Martelella endophytica	A0A0D5LNB8	Martelella endophytica.	262	1486262
Dioxygenase	Bacteria	Proteobacteria	Alphaproteobacteria	Rhizobiales	Aurantimonadaceae	Martelella	Martelella endophytica	A0A0D5LMR3	Martelella endophytica.	259	1486262
Uncharacterized protein	Bacteria	Proteobacteria	Alphaproteobacteria	Rhizobiales	Aurantimonadaceae	Aureimonas	Aureimonas altamirensis	A0A0B1Q9A0	Aureimonas altamirensis.	276	370622
Lipoprotein	Bacteria	Proteobacteria	Alphaproteobacteria	Rhizobiales	Aurantimonadaceae	Aureimonas	Aureimonas altamirensis	A0A0B1Q4K3	Aureimonas altamirensis.	271	370622
Lipoprotein	Bacteria	Proteobacteria	Alphaproteobacteria	Rhizobiales	Ancalomicrobiaceae	Siculibacillus	Siculibacillus lacustris	A0A4Q9VY76	Siculibacillus lacustris.	273	1549641
MetQ/NlpA family ABC transporter substrate-binding protein	Bacteria	Proteobacteria	Alphaproteobacteria	Rhizobiales	Ancalomicrobiaceae	Siculibacillus	Siculibacillus lacustris	A0A4Q9VU16	Siculibacillus lacustris.	264	1549641
Lipoprotein	Bacteria	Proteobacteria	Alphaproteobacteria	Rhizobiales	Ancalomicrobiaceae	Siculibacillus	Siculibacillus lacustris	A0A4Q9VJU2	Siculibacillus lacustris.	275	1549641
Lipoprotein	Bacteria	Proteobacteria	Alphaproteobacteria	Rhodospirillales	Acetobacteraceae	Commensalibacter	Commensalibacter sp. MX01	W7DM25	Commensalibacter sp. MX01.	273	1208583
Lipoprotein	Bacteria	Proteobacteria	Alphaproteobacteria	Rhodospirillales	Acetobacteraceae	Acetobacter	Acetobacter pasteurianus 386B	S6D6A0	Acetobacter pasteurianus 386B.	270	1266844
Lipoprotein	Bacteria	Proteobacteria	Alphaproteobacteria	Rhodospirillales	Acetobacteraceae	unclassified Acetobacteraceae	Acetobacteraceae bacterium AT-5844	G9ZX95	Acetobacteraceae bacterium AT-5844.	270	1054213
Lipoprotein	Bacteria	Proteobacteria	Alphaproteobacteria	Rhodospirillales	Acetobacteraceae	unclassified Acetobacteraceae	Acetobacteraceae bacterium AT-5844	G9ZX94	Acetobacteraceae bacterium AT-5844.	270	1054213
NLPA lipoprotein	Bacteria	Proteobacteria	Alphaproteobacteria	Rhodospirillales	Acetobacteraceae	Roseomonas	Roseomonas cervicalis ATCC 49957	D5RQN8	Roseomonas cervicalis ATCC 49957.	274	525371
Lipoprotein	Bacteria	Proteobacteria	Alphaproteobacteria	Rhodospirillales	Acetobacteraceae	Roseomonas	Roseomonas cervicalis ATCC 49957	D5RQN7	Roseomonas cervicalis ATCC 49957.	272	525371
Lipoprotein	Bacteria	Proteobacteria	Alphaproteobacteria	Rhodospirillales	Acetobacteraceae	Gluconacetobacter	Gluconacetobacter diazotrophicus PA1 5	A9HPJ3	Gluconacetobacter diazotrophicus (strain ATCC 49037 / DSM 5601 / PAl5)	272	272568
Lipoprotein	Bacteria	Proteobacteria	Alphaproteobacteria	Rhodospirillales	Acetobacteraceae	Rhodovastum	Rhodovastum atsumiense	A0A5M6J0L6	Rhodovastum atsumiense.	270	504468
MetQ/NlpA family ABC transporter substrate-binding protein	Bacteria	Proteobacteria	Alphaproteobacteria	Rhodospirillales	Acetobacteraceae	Rhodovastum	Rhodovastum atsumiense	A0A5M6IWQ4	Rhodovastum atsumiense.	261	504468
Lipoprotein	Bacteria	Proteobacteria	Alphaproteobacteria	Rhodospirillales	Acetobacteraceae	Rhodovastum	Rhodovastum atsumiense	A0A5M6IVM6	Rhodovastum atsumiense.	268	504468
Lipoprotein	Bacteria	Proteobacteria	Alphaproteobacteria	Rhodospirillales	Acetobacteraceae	Rhodovastum	Rhodovastum atsumiense	A0A5M6IUD4	Rhodovastum atsumiense.	270	504468
Lipoprotein	Bacteria	Proteobacteria	Alphaproteobacteria	Rhodospirillales	Acetobacteraceae	Acetobacter	Acetobacter sp. KACC 21233	A0A5C1YTN1	Acetobacter sp. KACC 21233.	269	2592655
Lipoprotein	Bacteria	Proteobacteria	Alphaproteobacteria	Rhodospirillales	Acetobacteraceae	Roseomonas	Roseomonas oryzae	A0A5B2TMU9	Roseomonas oryzae.	272	1608942
Lipoprotein	Bacteria	Proteobacteria	Alphaproteobacteria	Rhodospirillales	Acetobacteraceae	Roseomonas	Roseomonas oryzae	A0A5B2TKG6	Roseomonas oryzae.	276	1608942
Lipoprotein	Bacteria	Proteobacteria	Alphaproteobacteria	Rhodospirillales	Acetobacteraceae	Gluconobacter	Gluconobacter wancherniae NBRC 103581	A0A511AZV2	Gluconobacter wancherniae NBRC 103581.	269	656744
MetQ/NlpA family ABC transporter substrate-binding protein	Bacteria	Proteobacteria	Alphaproteobacteria	Rhodospirillales	Acetobacteraceae	Neokomagataea	Neokomagataea sp. Jb2	A0A506UKE1	Neokomagataea sp. Jb2.	320	2558904
Lipoprotein	Bacteria	Proteobacteria	Alphaproteobacteria	Rhodospirillales	Acetobacteraceae	Roseomonas	Roseomonas nepalensis	A0A502FIK4	Roseomonas nepalensis.	272	1854500
Metal ABC transporter substrate-binding protein	Bacteria	Proteobacteria	Alphaproteobacteria	Rhodospirillales	Acetobacteraceae	Neokomagataea	Neokomagataea tanensis	A0A4Y6V9H2	Neokomagataea tanensis.	256	661191
Lipoprotein	Bacteria	Proteobacteria	Alphaproteobacteria	Rhodospirillales	Acetobacteraceae	Swingsia	Swingsia samuiensis	A0A4Y6UK43	Swingsia samuiensis.	275	1293412
Lipoprotein	Bacteria	Proteobacteria	Alphaproteobacteria	Rhodospirillales	Acetobacteraceae	Swingsia	Swingsia sp. F3b2	A0A4Y6UD67	Swingsia sp. F3b2.	287	2558361
Lipoprotein	Bacteria	Proteobacteria	Alphaproteobacteria	Rhodospirillales	Acetobacteraceae	Swingsia	Swingsia sp. F3b2	A0A4Y6UBM2	Swingsia sp. F3b2.	279	2558361
Lipoprotein	Bacteria	Proteobacteria	Alphaproteobacteria	Rhodospirillales	Acetobacteraceae	Dankookia	Dankookia rubra	A0A4V3A9V8	Dankookia rubra.	268	1442381
Lipoprotein	Bacteria	Proteobacteria	Alphaproteobacteria	Rhodospirillales	Acetobacteraceae	Dankookia	Dankookia rubra	A0A4R5QCX5	Dankookia rubra.	265	1442381
Lipoprotein	Bacteria	Proteobacteria	Alphaproteobacteria	Rhodospirillales	Acetobacteraceae	Paracraurococcus	Paracraurococcus sp. NE82	A0A4R4D4M2	Paracraurococcus sp. NE82.	274	2527868
Lipoprotein	Bacteria	Proteobacteria	Alphaproteobacteria	Rhodospirillales	Acetobacteraceae	Roseococcus	Roseococcus sp. SYP-B2431	A0A4R0YH28	Roseococcus sp. SYP-B2431.	266	2496640
Lipoprotein	Bacteria	Proteobacteria	Alphaproteobacteria	Rhodospirillales	Acetobacteraceae	Roseococcus	Roseococcus sp. SYP-B2431	A0A4R0YGJ8	Roseococcus sp. SYP-B2431.	266	2496640
Metal ABC transporter substrate-binding protein	Bacteria	Proteobacteria	Alphaproteobacteria	Rhodospirillales	Acetobacteraceae	unclassified Acetobacteraceae	Acetobacteraceae bacterium	A0A4Q4CNV0	Acetobacteraceae bacterium.	250	1909293
Lipoprotein	Bacteria	Proteobacteria	Alphaproteobacteria	Rhodospirillales	Acetobacteraceae	unclassified Acetobacteraceae	Acetobacteraceae bacterium	A0A4P7WHL7	Acetobacteraceae bacterium.	268	1909293
Lipoprotein	Bacteria	Proteobacteria	Alphaproteobacteria	Rhodospirillales	Acetobacteraceae	Komagataeibacter	Komagataeibacter diospyri	A0A4P5NKX2	Komagataeibacter diospyri.	273	1932662
Lipoprotein	Bacteria	Proteobacteria	Alphaproteobacteria	Rhodospirillales	Acetobacteraceae	Rhodovarius	Rhodovarius sp. CCP-6	A0A437MJI4	Rhodovarius sp. CCP-6.	273	1979269
Lipoprotein	Bacteria	Proteobacteria	Alphaproteobacteria	Rhodospirillales	Acetobacteraceae	Rhodovarius	Rhodovarius sp. CCP-6	A0A437MJG8	Rhodovarius sp. CCP-6.	267	1979269
Iron ABC transporter substrate-binding protein	Bacteria	Proteobacteria	Alphaproteobacteria	Rhodospirillales	Acetobacteraceae	Rhodovarius	Rhodovarius sp. CCP-6	A0A437M1S7	Rhodovarius sp. CCP-6.	264	1979269
Lipoprotein	Bacteria	Proteobacteria	Alphaproteobacteria	Rhodospirillales	Acetobacteraceae	Roseomonas	Roseomonas sp. Z24	A0A3A9JNI3	Roseomonas sp. Z24.	270	2382222
Lipoprotein	Bacteria	Proteobacteria	Alphaproteobacteria	Rhodospirillales	Acetobacteraceae	Roseomonas	Roseomonas sp. Z24	A0A3A9JKP2	Roseomonas sp. Z24.	271	2382222
Lipoprotein	Bacteria	Proteobacteria	Alphaproteobacteria	Rhodospirillales	Acetobacteraceae	Roseomonas	Roseomonas sp. Z24	A0A3A9JDE9	Roseomonas sp. Z24.	269	2382222
Lipoprotein	Bacteria	Proteobacteria	Alphaproteobacteria	Rhodospirillales	Acetobacteraceae	Roseomonas	Roseomonas mucosa	A0A379MXJ1	Roseomonas mucosa.	273	207340
Lipoprotein	Bacteria	Proteobacteria	Alphaproteobacteria	Rhodospirillales	Acetobacteraceae	Gluconacetobacter	Gluconacetobacter liquefaciens	A0A370G9U3	Gluconacetobacter liquefaciens	269	89584
Lipoprotein	Bacteria	Proteobacteria	Alphaproteobacteria	Rhodospirillales	Acetobacteraceae	Komagataeibacter	Komagataeibacter saccharivorans	A0A347WGC2	Komagataeibacter saccharivorans.	272	265959
Lipoprotein	Bacteria	Proteobacteria	Alphaproteobacteria	Rhodospirillales	Acetobacteraceae	unclassified Acetobacteraceae	Acetobacteraceae bacterium DB1506	A0A327MBF3	Acetobacteraceae bacterium DB1506.	269	2230885
Lipoprotein	Bacteria	Proteobacteria	Alphaproteobacteria	Rhodospirillales	Acetobacteraceae	Komagataeibacter	Komagataeibacter xylinus	A0A318PSH6	Komagataeibacter xylinus	273	28448
Lipoprotein	Bacteria	Proteobacteria	Alphaproteobacteria	Rhodospirillales	Acetobacteraceae	Commensalibacter	Commensalibacter sp. ESL0284	A0A318MZG2	Commensalibacter sp. ESL0284.	269	2070537
Lipoprotein	Bacteria	Proteobacteria	Alphaproteobacteria	Rhodospirillales	Acetobacteraceae	Zavarzinia	Zavarzinia compransoris	A0A317DV85	Zavarzinia compransoris.	266	1264899
Lipoprotein	Bacteria	Proteobacteria	Alphaproteobacteria	Rhodospirillales	Acetobacteraceae	Humitalea	Humitalea rosea	A0A2W7ILV4	Humitalea rosea.	266	990373
Lipoprotein	Bacteria	Proteobacteria	Alphaproteobacteria	Rhodospirillales	Acetobacteraceae	Roseomonas	Roseomonas rhizosphaerae	A0A2C7AEA0	Roseomonas rhizosphaerae.	275	1335062
Lipoprotein	Bacteria	Proteobacteria	Alphaproteobacteria	Rhodospirillales	Acetobacteraceae	Roseomonas	Roseomonas rhizosphaerae	A0A2C7A9L0	Roseomonas rhizosphaerae.	270	1335062
Lipoprotein	Bacteria	Proteobacteria	Alphaproteobacteria	Rhodospirillales	Acetobacteraceae	Parasaccharibacter	Parasaccharibacter apium	A0A2C6IYR0	Parasaccharibacter apium.	276	1510841
Lipoprotein	Bacteria	Proteobacteria	Alphaproteobacteria	Rhodospirillales	Acetobacteraceae	Acetobacter	Acetobacter orientalis	A0A252CAG7	Acetobacter orientalis.	270	146474
Lipoprotein	Bacteria	Proteobacteria	Alphaproteobacteria	Rhodospirillales	Acetobacteraceae	Acetobacter	Acetobacter indonesiensis	A0A252AW29	Acetobacter indonesiensis.	270	104101
Dioxygenase	Bacteria	Proteobacteria	Alphaproteobacteria	Rhodospirillales	Acetobacteraceae	Commensalibacter	Commensalibacter intestini	A0A251ZU56	Commensalibacter intestini.	262	479936
Lipoprotein	Bacteria	Proteobacteria	Alphaproteobacteria	Rhodospirillales	Acetobacteraceae	Acetobacter	Acetobacter cibinongensis	A0A1Z5YRV8	Acetobacter cibinongensis.	270	146475
Lipoprotein	Bacteria	Proteobacteria	Alphaproteobacteria	Rhodospirillales	Acetobacteraceae	Acetobacter	Acetobacter sp. DmW_043	A0A1Y3G3T6	Acetobacter sp. DmW_043.	270	1670658
Lipoprotein	Bacteria	Proteobacteria	Alphaproteobacteria	Rhodospirillales	Acetobacteraceae	Roseomonas	Roseomonas deserti	A0A1V2GYY1	Roseomonas deserti.	269	1817963
Lipoprotein	Bacteria	Proteobacteria	Alphaproteobacteria	Rhodospirillales	Acetobacteraceae	Roseomonas	Roseomonas deserti	A0A1V2GWS8	Roseomonas deserti.	273	1817963
Uncharacterized protein	Bacteria	Proteobacteria	Alphaproteobacteria	Rhodospirillales	Acetobacteraceae	Roseomonas	Roseomonas deserti	A0A1V2GUY1	Roseomonas deserti.	261	1817963
Lipoprotein	Bacteria	Proteobacteria	Alphaproteobacteria	Rhodospirillales	Acetobacteraceae	Neoasaia	Neoasaia chiangmaiensis	A0A1U9KSQ7	Neoasaia chiangmaiensis.	274	320497
Lipoprotein	Bacteria	Proteobacteria	Alphaproteobacteria	Rhodospirillales	Acetobacteraceae	Bombella	Bombella intestini	A0A1S8GND2	Bombella intestini.	274	1539051
Lipoprotein	Bacteria	Proteobacteria	Alphaproteobacteria	Rhodospirillales	Acetobacteraceae	Roseomonas	Roseomonas mucosa	A0A1S8D3S1	Roseomonas mucosa.	270	207340
Lipoprotein	Bacteria	Proteobacteria	Alphaproteobacteria	Rhodospirillales	Acetobacteraceae	Roseomonas	Roseomonas mucosa	A0A1S8D2F3	Roseomonas mucosa.	277	207340
Lipoprotein	Bacteria	Proteobacteria	Alphaproteobacteria	Rhodospirillales	Acetobacteraceae	Roseomonas	Roseomonas rosea	A0A1M6C557	Roseomonas rosea.	272	198092
Lipoprotein	Bacteria	Proteobacteria	Alphaproteobacteria	Rhodospirillales	Acetobacteraceae	Roseomonas	Roseomonas rosea	A0A1M6C4F2	Roseomonas rosea.	266	198092
Lipoprotein	Bacteria	Proteobacteria	Alphaproteobacteria	Rhodospirillales	Acetobacteraceae	Roseomonas	Roseomonas gilardii	A0A1L7AJ90	Roseomonas gilardii.	276	257708
Lipoprotein	Bacteria	Proteobacteria	Alphaproteobacteria	Rhodospirillales	Acetobacteraceae	Roseomonas	Roseomonas stagni DSM 19981	A0A1I4B952	Roseomonas stagni DSM 19981.	267	1123062
Lipoprotein	Bacteria	Proteobacteria	Alphaproteobacteria	Rhodospirillales	Acetobacteraceae	Belnapia	Belnapia rosea	A0A1G6YMN3	Belnapia rosea.	269	938405
Lipoprotein	Bacteria	Proteobacteria	Alphaproteobacteria	Rhodospirillales	Acetobacteraceae	Kozakia	Kozakia baliensis	A0A1D8UTI0	Kozakia baliensis.	274	153496
Dioxygenase	Bacteria	Proteobacteria	Alphaproteobacteria	Rhodospirillales	Acetobacteraceae	Gluconobacter	Gluconobacter albidus	A0A149TKQ1	Gluconobacter albidus.	264	318683
Dioxygenase	Bacteria	Proteobacteria	Alphaproteobacteria	Rhodospirillales	Acetobacteraceae	Acetobacter	Acetobacter malorum	A0A149R627	Acetobacter malorum.	260	178901
Lipoprotein	Bacteria	Proteobacteria	Alphaproteobacteria	Rhodospirillales	Acetobacteraceae	Acetobacter	Acetobacter senegalensis	A0A0U5ESD0	Acetobacter senegalensis.	270	446692
Lipoprotein	Bacteria	Proteobacteria	Alphaproteobacteria	Rhodospirillales	Acetobacteraceae	Acetobacter	Acetobacter ghanensis	A0A0U5BHI9	Acetobacter ghanensis.	271	431306
Lipoprotein	Bacteria	Proteobacteria	Alphaproteobacteria	Rhodospirillales	Acetobacteraceae	Gluconobacter	Gluconobacter frateurii NBRC 103465	A0A0S6TEE4	Gluconobacter frateurii NBRC 103465.	280	1307834
Lipoprotein	Bacteria	Proteobacteria	Alphaproteobacteria	Rhodospirillales	Acetobacteraceae	Asaia	Asaia bogorensis NBRC 16594	A0A0P0YDC2	Asaia bogorensis NBRC 16594.	271	1231624
Lipoprotein	Bacteria	Proteobacteria	Alphaproteobacteria	Rhodospirillales	Acetobacteraceae	Komagataeibacter	Komagataeibacter europaeus	A0A0M0EH44	Komagataeibacter europaeus	273	33995
NLPA lipoprotein	Bacteria	Proteobacteria	Betaproteobacteria	Rhodocyclales	Zoogloeaceae	Thauera	Thauera linaloolentis 47Lol = DSM 12138	N6Y8U0	Thauera linaloolentis 47Lol = DSM 12138.	264	1123367
Putative ABC transporter periplasmic binding protein	Bacteria	Proteobacteria	Betaproteobacteria	Rhodocyclales	Zoogloeaceae	Thauera	Thauera aminoaromatica S2	N6Y6H1	Thauera aminoaromatica S2.	277	1234381
Lipoprotein	Bacteria	Proteobacteria	Betaproteobacteria	Rhodocyclales	Zoogloeaceae	Thauera	Thauera sp. 27	N6XXB5	Thauera sp. 27.	266	305700
NLPA lipoprotein	Bacteria	Proteobacteria	Betaproteobacteria	Rhodocyclales	Zoogloeaceae	Thauera	Thauera sp. 27	N6XAI1	Thauera sp. 27.	264	305700
Lipoprotein	Bacteria	Proteobacteria	Betaproteobacteria	Rhodocyclales	Zoogloeaceae	Azoarcus	Azoarcus sp. DD4	A0A4Y6KUS3	Azoarcus sp. DD4.	269	2027405
ABC transporter substrate-binding protein	Bacteria	Proteobacteria	Betaproteobacteria	Rhodocyclales	Zoogloeaceae	Azoarcus	Azoarcus sp. CC-YHH838	A0A4V3WB43	Azoarcus sp. CC-YHH838.	256	2565930
Lipoprotein	Bacteria	Proteobacteria	Betaproteobacteria	Rhodocyclales	Zoogloeaceae	Azoarcus	Azoarcus sp. CC-YHH838	A0A4S4B507	Azoarcus sp. CC-YHH838.	272	2565930
MetQ/NlpA family ABC transporter substrate-binding protein	Bacteria	Proteobacteria	Betaproteobacteria	Rhodocyclales	Zoogloeaceae	Azoarcus	Azoarcus sp. CC-YHH848	A0A4S4AYG6	Azoarcus sp. CC-YHH848.	264	2565932
Lipoprotein	Bacteria	Proteobacteria	Betaproteobacteria	Rhodocyclales	Zoogloeaceae	Azoarcus	Azoarcus sp. CC-YHH848	A0A4S4AYG0	Azoarcus sp. CC-YHH848.	266	2565932
ABC transporter substrate-binding protein	Bacteria	Proteobacteria	Betaproteobacteria	Rhodocyclales	Zoogloeaceae	Azoarcus	Azoarcus sp. CC-YHH848	A0A4S4ARN9	Azoarcus sp. CC-YHH848.	257	2565932
Lipoprotein	Bacteria	Proteobacteria	Betaproteobacteria	Rhodocyclales	Zoogloeaceae	Azoarcus	Azoarcus indigens	A0A4R6EH93	Azoarcus indigens.	268	29545
Methionine ABC transporter substrate-binding protein	Bacteria	Proteobacteria	Betaproteobacteria	Rhodocyclales	Zoogloeaceae	Azoarcus	Azoarcus sp. DN11	A0A3S7UG03	Azoarcus sp. DN11.	264	356837
Methionine ABC transporter substrate-binding protein	Bacteria	Proteobacteria	Betaproteobacteria	Rhodocyclales	Zoogloeaceae	Thauera	Thauera sp. K11	A0A290ZJ74	Thauera sp. K11.	263	2005884
Methionine ABC transporter substrate-binding protein	Bacteria	Proteobacteria	Betaproteobacteria	Rhodocyclales	Zoogloeaceae	Thauera	Thauera humireducens	A0A140IDW3	Thauera humireducens.	277	1134435
Methionine ABC transporter substrate-binding protein	Bacteria	Proteobacteria	Betaproteobacteria	Rhodocyclales	Zoogloeaceae	Thauera	Thauera humireducens	A0A140IDW1	Thauera humireducens.	274	1134435
Lipoprotein	Bacteria	Proteobacteria	Betaproteobacteria	Rhodocyclales	Zoogloeaceae	Thauera	Thauera humireducens	A0A127K5S8	Thauera humireducens.	266	1134435
Lipoprotein	Bacteria	Proteobacteria	Betaproteobacteria	Burkholderiales	Sutterellaceae	Sutterella	Sutterella wadsworthensis HGA0223	S3BFP4	Sutterella wadsworthensis HGA0223.	287	1203554	y
Lipoprotein	Bacteria	Proteobacteria	Betaproteobacteria	Burkholderiales	Sutterellaceae	Sutterella	Sutterella sp. CAG:521	R7KQ50	Sutterella sp. CAG:521.	267	1262977	y
Lipoprotein	Bacteria	Proteobacteria	Betaproteobacteria	Burkholderiales	Sutterellaceae	Sutterella	Sutterella sp. CAG:521	R7KKF9	Sutterella sp. CAG:521.	286	1262977	y
Lipoprotein	Bacteria	Proteobacteria	Betaproteobacteria	Burkholderiales	Sutterellaceae	Sutterella	Sutterella sp. CAG:351	R7IJQ7	Sutterella sp. CAG:351.	268	1262975	y
Lipoprotein	Bacteria	Proteobacteria	Betaproteobacteria	Burkholderiales	Sutterellaceae	Sutterella	Sutterella sp. CAG:351	R7IHY0	Sutterella sp. CAG:351.	270	1262975	y
Lipoprotein	Bacteria	Proteobacteria	Betaproteobacteria	Burkholderiales	Sutterellaceae	Sutterella	Sutterella sp. CAG:351	R7IF91	Sutterella sp. CAG:351.	265	1262975
Lipoprotein	Bacteria	Proteobacteria	Betaproteobacteria	Burkholderiales	Sutterellaceae	Sutterella	Sutterella sp. CAG:351	R7IDD7	Sutterella sp. CAG:351.	263	1262975
Lipoprotein	Bacteria	Proteobacteria	Betaproteobacteria	Burkholderiales	Sutterellaceae	Sutterella	Sutterella sp. CAG:397	R7C453	Sutterella sp. CAG:397.	269	1262976	y
Lipoprotein	Bacteria	Proteobacteria	Betaproteobacteria	Burkholderiales	Sutterellaceae	Sutterella	Sutterella sp. CAG:397	R7C1Z8	Sutterella sp. CAG:397.	264	1262976
Lipoprotein	Bacteria	Proteobacteria	Betaproteobacteria	Burkholderiales	Sutterellaceae	Sutterella	Sutterella sp. CAG:397	R7C1P9	Sutterella sp. CAG:397.	276	1262976	y
Lipoprotein	Bacteria	Proteobacteria	Betaproteobacteria	Burkholderiales	Sutterellaceae	Sutterella	Sutterella sp. CAG:397	R7BY76	Sutterella sp. CAG:397.	270	1262976	y
Lipoprotein YaeC family	Bacteria	Proteobacteria	Betaproteobacteria	Burkholderiales	Sutterellaceae	Sutterella	Sutterella sp. CAG:397	R7BV68	Sutterella sp. CAG:397.	262	1262976
Lipoprotein	Bacteria	Proteobacteria	Betaproteobacteria	Burkholderiales	Sutterellaceae	Sutterella	Sutterella wadsworthensis 2_1_59BFAA	K1JTL8	Sutterella wadsworthensis 2_1_59BFAA.	266	742823
Lipoprotein	Bacteria	Proteobacteria	Betaproteobacteria	Burkholderiales	Sutterellaceae	Sutterella	Sutterella wadsworthensis 2_1_59BFAA	K1JH38	Sutterella wadsworthensis 2_1_59BFAA.	272	742823	y
Lipoprotein	Bacteria	Proteobacteria	Betaproteobacteria	Burkholderiales	Sutterellaceae	Sutterella	Sutterella parvirubra YIT 11816	H3KGN8	Sutterella parvirubra YIT 11816.	277	762967	y
Lipoprotein	Bacteria	Proteobacteria	Betaproteobacteria	Burkholderiales	Sutterellaceae	Sutterella	Sutterella parvirubra YIT 11816	H3KD51	Sutterella parvirubra YIT 11816.	283	762967	y
NLPA lipoprotein	Bacteria	Proteobacteria	Betaproteobacteria	Burkholderiales	Sutterellaceae	Parasutterella	Parasutterella excrementihominis YIT 11859	F3QLJ1	Parasutterella excrementihominis YIT 11859.	264	762966
Lipoprotein	Bacteria	Proteobacteria	Betaproteobacteria	Burkholderiales	Sutterellaceae	Parasutterella	Parasutterella excrementihominis YIT 11859	F3QL78	Parasutterella excrementihominis YIT 11859.	270	762966	y
Lipoprotein	Bacteria	Proteobacteria	Betaproteobacteria	Burkholderiales	Sutterellaceae	Parasutterella	Parasutterella excrementihominis YIT 11859	F3QKB9	Parasutterella excrementihominis YIT 11859.	280	762966
Lipoprotein	Bacteria	Proteobacteria	Betaproteobacteria	Burkholderiales	Sutterellaceae	Sutterella	Sutterella wadsworthensis 3_1_45B	E7H5V5	Sutterella wadsworthensis 3_1_45B.	296	742821	y
Lipoprotein	Bacteria	Proteobacteria	Betaproteobacteria	Burkholderiales	Sutterellaceae	Sutterella	Sutterella wadsworthensis 3_1_45B	E7H3B1	Sutterella wadsworthensis 3_1_45B.	278	742821	y
Lipoprotein	Bacteria	Proteobacteria	Betaproteobacteria	Burkholderiales	Sutterellaceae	Sutterella	Sutterella wadsworthensis 3_1_45B	E7H2E0	Sutterella wadsworthensis 3_1_45B.	270	742821
Lipoprotein	Bacteria	Proteobacteria	Betaproteobacteria	Burkholderiales	Sutterellaceae	Sutterella	Sutterella wadsworthensis 3_1_45B	E7H0B8	Sutterella wadsworthensis 3_1_45B.	270	742821
Lipoprotein	Bacteria	Proteobacteria	Betaproteobacteria	Burkholderiales	Sutterellaceae	Sutterella	Sutterella faecalis	A0A5B7ZP84	Sutterella sp. KGMB03119.	278	2584944	y
Lipoprotein	Bacteria	Proteobacteria	Betaproteobacteria	Burkholderiales	Sutterellaceae	Sutterella	Sutterella faecalis	A0A5B7ZMQ4	Sutterella sp. KGMB03119.	278	2584944	y
Lipoprotein	Bacteria	Proteobacteria	Betaproteobacteria	Burkholderiales	Sutterellaceae	Sutterella	Sutterella faecalis	A0A5B7ZL84	Sutterella sp. KGMB03119.	278	2584944	y
Lipoprotein	Bacteria	Proteobacteria	Betaproteobacteria	Burkholderiales	Sutterellaceae	Sutterella	Sutterella faecalis	A0A5B7ZGU1	Sutterella sp. KGMB03119.	291	2584944	y
Lipoprotein	Bacteria	Proteobacteria	Betaproteobacteria	Burkholderiales	Sutterellaceae	Sutterella	Sutterella faecalis	A0A5B7ZGA6	Sutterella sp. KGMB03119.	274	2584944
Lipoprotein	Bacteria	Proteobacteria	Betaproteobacteria	Burkholderiales	Sutterellaceae	Sutterella	Sutterella faecalis	A0A5B7ZFY3	Sutterella sp. KGMB03119.	270	2584944
Lipoprotein	Bacteria	Proteobacteria	Betaproteobacteria	Burkholderiales	Sutterellaceae	Sutterella	Sutterella faecalis	A0A5B7ZFJ3	Sutterella sp. KGMB03119.	277	2584944	y
Lipoprotein	Bacteria	Proteobacteria	Betaproteobacteria	Burkholderiales	Sutterellaceae	Sutterella	Sutterella sp. AM11-39	A0A415CGY9	Sutterella sp. AM11-39.	273	2292075	y
ABC transporter substrate-binding protein	Bacteria	Proteobacteria	Betaproteobacteria	Burkholderiales	Sutterellaceae	Sutterella	Sutterella sp. AM11-39	A0A415CF75	Sutterella sp. AM11-39.	258	2292075
MetQ/NlpA family ABC transporter substrate-binding protein	Bacteria	Proteobacteria	Betaproteobacteria	Burkholderiales	Sutterellaceae	Sutterella	Sutterella sp. AM11-39	A0A415CE58	Sutterella sp. AM11-39.	294	2292075	y
Lipoprotein	Bacteria	Proteobacteria	Betaproteobacteria	Burkholderiales	Sutterellaceae	Sutterella	Sutterella sp.	A0A3D0HG34	Sutterella sp.	268	1981025	y
Methionine ABC transporter substrate-binding protein	Bacteria	Proteobacteria	Betaproteobacteria	Burkholderiales	Sutterellaceae	Sutterella	Sutterella sp.	A0A3D0HE26	Sutterella sp.	261	1981025
Lipoprotein	Bacteria	Proteobacteria	Betaproteobacteria	Burkholderiales	Sutterellaceae	Sutterella	Sutterella sp.	A0A3D0HCR0	Sutterella sp.	265	1981025
Lipoprotein	Bacteria	Proteobacteria	Betaproteobacteria	Burkholderiales	Sutterellaceae	Sutterella	Sutterella sp.	A0A3D0HBH6	Sutterella sp.	265	1981025
Lipoprotein	Bacteria	Proteobacteria	Betaproteobacteria	Burkholderiales	Sutterellaceae	Sutterella	Sutterella sp.	A0A3B9Q9B0	Sutterella sp.	268	1981025
Lipoprotein	Bacteria	Proteobacteria	Betaproteobacteria	Burkholderiales	Sutterellaceae	Mesosutterella	Mesosutterella multiformis	A0A388SCY5	Mesosutterella multiformis.	278	2259133	y
Lipoprotein	Bacteria	Proteobacteria	Betaproteobacteria	Burkholderiales	Sutterellaceae	Mesosutterella	Mesosutterella multiformis	A0A388SCQ8	Mesosutterella multiformis.	283	2259133
Lipoprotein	Bacteria	Proteobacteria	Betaproteobacteria	Burkholderiales	Sutterellaceae	Mesosutterella	Mesosutterella multiformis	A0A388SCQ3	Mesosutterella multiformis.	271	2259133
Lipoprotein	Bacteria	Proteobacteria	Betaproteobacteria	Burkholderiales	Sutterellaceae	Mesosutterella	Mesosutterella multiformis	A0A388SBW7	Mesosutterella multiformis.	265	2259133
Lipoprotein	Bacteria	Proteobacteria	Betaproteobacteria	Burkholderiales	Sutterellaceae	Mesosutterella	Mesosutterella multiformis	A0A388SBM2	Mesosutterella multiformis.	264	2259133
Lipoprotein	Bacteria	Proteobacteria	Betaproteobacteria	Burkholderiales	Sutterellaceae	Sutterella	Sutterella sp.	A0A356A192	Sutterella sp.	272	1981025	y
Methionine ABC transporter substrate-binding protein	Bacteria	Proteobacteria	Betaproteobacteria	Burkholderiales	Sutterellaceae	Sutterella	Sutterella sp.	A0A352LMV8	Sutterella sp.	261	1981025
Lipoprotein	Bacteria	Proteobacteria	Betaproteobacteria	Burkholderiales	Sutterellaceae	Sutterella	Sutterella sp.	A0A352LKP5	Sutterella sp.	265	1981025
Methionine ABC transporter substrate-binding protein	Bacteria	Proteobacteria	Betaproteobacteria	Burkholderiales	Sutterellaceae	Sutterella	Sutterella sp.	A0A350LLL0	Sutterella sp.	262	1981025	y
Lipoprotein	Bacteria	Proteobacteria	Betaproteobacteria	Burkholderiales	Sutterellaceae	Sutterella	Sutterella megalosphaeroides	A0A2Z6ICW2	Sutterella megalosphaeroides.	279	2494234	y
Lipoprotein	Bacteria	Proteobacteria	Betaproteobacteria	Burkholderiales	Sutterellaceae	Sutterella	Sutterella megalosphaeroides	A0A2Z6I8C1	Sutterella megalosphaeroides.	284	2494234
Lipoprotein	Bacteria	Proteobacteria	Betaproteobacteria	Burkholderiales	Sutterellaceae	Sutterella	Sutterella sp. KLE1602	A0A139JZN2	Sutterella sp. KLE1602.	287	1574262	y
Lipoprotein	Bacteria	Proteobacteria	Betaproteobacteria	Rhodocyclales	Rhodocyclaceae	Azospira	Azospira oryzae PS	G8QIM3	Azospira oryzae (strain ATCC BAA-33 / DSM 13638 / PS)	269	640081
Lipoprotein	Bacteria	Proteobacteria	Betaproteobacteria	Rhodocyclales	Rhodocyclaceae	Azospira	Azospira sp. I09	A0A5H2YA95	Azospira sp. I09.	267	1765049
Lipoprotein	Bacteria	Proteobacteria	Betaproteobacteria	Rhodocyclales	Rhodocyclaceae	Oryzomicrobium	Oryzomicrobium terrae	A0A5C1EAX1	Oryzomicrobium terrae.	267	1735038
Lipoprotein	Bacteria	Proteobacteria	Betaproteobacteria	Rhodocyclales	Rhodocyclaceae	Oryzomicrobium	Oryzomicrobium terrae	A0A5C1E635	Oryzomicrobium terrae.	279	1735038
Methionine ABC transporter substrate-binding protein	Bacteria	Proteobacteria	Betaproteobacteria	Rhodocyclales	Rhodocyclaceae	unclassified Rhodocyclaceae	Rhodocyclaceae bacterium	A0A2K9L8G4	Rhodocyclaceae bacterium.	257	1898103
Methionine ABC transporter substrate-binding protein	Bacteria	Proteobacteria	Betaproteobacteria	Rhodocyclales	Rhodocyclaceae	Candidatus Dactylopiibacterium	Candidatus Dactylopiibacterium carminicum	A0A272EPY1	Candidatus Dactylopiibacterium carminicum.	256	857335
Lipoprotein	Bacteria	Proteobacteria	Betaproteobacteria	Rhodocyclales	Rhodocyclaceae	Propionivibrio	Propionivibrio dicarboxylicus	A0A1G7XU20	Propionivibrio dicarboxylicus.	266	83767
Lipoprotein	Bacteria	Proteobacteria	Betaproteobacteria	Burkholderiales	Oxalobacteraceae	Janthinobacterium	Janthinobacterium agaricidamnosum NBRC 102515 = DS	W0V5D4	Janthinobacterium agaricidamnosum NBRC 102515 = DSM 9628.	275	1349767
Lipoprotein	Bacteria	Proteobacteria	Betaproteobacteria	Burkholderiales	Oxalobacteraceae	Janthinobacterium	Janthinobacterium sp. HH01	L9PC91	Janthinobacterium sp. HH01.	281	1198452
Lipoprotein	Bacteria	Proteobacteria	Betaproteobacteria	Burkholderiales	Oxalobacteraceae	Massilia	Massilia timonae CCUG 45783	K9D8H9	Massilia timonae CCUG 45783.	281	883126
Lipoprotein	Bacteria	Proteobacteria	Betaproteobacteria	Burkholderiales	Oxalobacteraceae	Herbaspirillum	Herbaspirillum sp. YR522	J3HUL4	Herbaspirillum sp. YR522.	266	1144342
ABC-type metal ion transport system| periplasmic component/surface antigen	Bacteria	Proteobacteria	Betaproteobacteria	Burkholderiales	Oxalobacteraceae	Herbaspirillum	Herbaspirillum sp. CF444	J3DKF4	Herbaspirillum sp. CF444.	263	1144319
ABC-type metal ion transport system| periplasmic component/surface antigen	Bacteria	Proteobacteria	Betaproteobacteria	Burkholderiales	Oxalobacteraceae	Herbaspirillum	Herbaspirillum sp. CF444	J3DCH6	Herbaspirillum sp. CF444.	278	1144319
Lipoprotein	Bacteria	Proteobacteria	Betaproteobacteria	Burkholderiales	Oxalobacteraceae	Herbaspirillum	Herbaspirillum sp. CF444	J3D588	Herbaspirillum sp. CF444.	266	1144319
Lipoprotein	Bacteria	Proteobacteria	Betaproteobacteria	Burkholderiales	Oxalobacteraceae	Herbaspirillum	Herbaspirillum sp. CF444	J3CYV4	Herbaspirillum sp. CF444.	273	1144319
Lipoprotein	Bacteria	Proteobacteria	Betaproteobacteria	Burkholderiales	Oxalobacteraceae	Herbaspirillum	Herbaspirillum sp. YR522	J3CNL2	Herbaspirillum sp. YR522.	275	1144342
ABC-type metal ion transport system| periplasmic component/surface antigen	Bacteria	Proteobacteria	Betaproteobacteria	Burkholderiales	Oxalobacteraceae	Herbaspirillum	Herbaspirillum sp. YR522	J2WBJ2	Herbaspirillum sp. YR522.	271	1144342
Lipoprotein	Bacteria	Proteobacteria	Betaproteobacteria	Burkholderiales	Oxalobacteraceae	Herbaspirillum	Herbaspirillum sp. YR522	J2W7V7	Herbaspirillum sp. YR522.	270	1144342
Lipoprotein	Bacteria	Proteobacteria	Betaproteobacteria	Burkholderiales	Oxalobacteraceae	Herbaspirillum	Herbaspirillum sp. CF444	J2LAC1	Herbaspirillum sp. CF444.	270	1144319
Lipoprotein	Bacteria	Proteobacteria	Betaproteobacteria	Burkholderiales	Oxalobacteraceae	Herbaspirillum	Herbaspirillum sp. CF444	J2KXM4	Herbaspirillum sp. CF444.	266	1144319
Methionine ABC transporter substrate-binding protein	Bacteria	Proteobacteria	Betaproteobacteria	Burkholderiales	Oxalobacteraceae	Collimonas	Collimonas fungivorans Ter331	G0AJT2	Collimonas fungivorans (strain Ter331)	257	1005048
Lipoprotein	Bacteria	Proteobacteria	Betaproteobacteria	Burkholderiales	Oxalobacteraceae	Collimonas	Collimonas fungivorans Ter331	G0ADK6	Collimonas fungivorans (strain Ter331)	276	1005048
Lipoprotein	Bacteria	Proteobacteria	Betaproteobacteria	Burkholderiales	Oxalobacteraceae	Herbaspirillum	Herbaspirillum seropedicae SmR1	D8IZ10	Herbaspirillum seropedicae (strain SmR1)	276	757424
ABC-type metal ion transport system| periplasmic component/surface antigen protein	Bacteria	Proteobacteria	Betaproteobacteria	Burkholderiales	Oxalobacteraceae	Herbaspirillum	Herbaspirillum seropedicae SmR1	D8IV82	Herbaspirillum seropedicae (strain SmR1)	268	757424
Lipoprotein	Bacteria	Proteobacteria	Betaproteobacteria	Burkholderiales	Oxalobacteraceae	Herbaspirillum	Herbaspirillum seropedicae SmR1	D8IRI0	Herbaspirillum seropedicae (strain SmR1)	274	757424
MetQ/NlpA family ABC transporter substrate-binding protein	Bacteria	Proteobacteria	Betaproteobacteria	Burkholderiales	Oxalobacteraceae	Herbaspirillum	Herbaspirillum sp. 3R-11	A0A5F0LCX7	Herbaspirillum sp. 3R-11.	263	2559616
Lipoprotein	Bacteria	Proteobacteria	Betaproteobacteria	Burkholderiales	Oxalobacteraceae	Herbaspirillum	Herbaspirillum sp. 3R-11	A0A5F0LC07	Herbaspirillum sp. 3R-11.	272	2559616
Methionine ABC transporter substrate-binding protein	Bacteria	Proteobacteria	Betaproteobacteria	Burkholderiales	Oxalobacteraceae	Herbaspirillum	Herbaspirillum sp. 3R-11	A0A5F0LAA4	Herbaspirillum sp. 3R-11.	263	2559616
Lipoprotein	Bacteria	Proteobacteria	Betaproteobacteria	Burkholderiales	Oxalobacteraceae	Herbaspirillum	Herbaspirillum huttiense	A0A561KW04	Herbaspirillum huttiense.	269	863372
Lipoprotein	Bacteria	Proteobacteria	Betaproteobacteria	Burkholderiales	Oxalobacteraceae	Herbaspirillum	Herbaspirillum hiltneri	A0A561K1W1	Herbaspirillum hiltneri.	266	341045
D-methionine transport system substrate-binding protein	Bacteria	Proteobacteria	Betaproteobacteria	Burkholderiales	Oxalobacteraceae	Herbaspirillum	Herbaspirillum sp. SJZ130	A0A542MHK8	Herbaspirillum sp. SJZ130.	273	2572918
D-methionine transport system substrate-binding protein	Bacteria	Proteobacteria	Betaproteobacteria	Burkholderiales	Oxalobacteraceae	Herbaspirillum	Herbaspirillum sp. SJZ107	A0A542MDK5	Herbaspirillum sp. SJZ107.	275	2572881	y
Lipoprotein	Bacteria	Proteobacteria	Betaproteobacteria	Burkholderiales	Oxalobacteraceae	Herbaspirillum	Herbaspirillum sp. SJZ130	A0A542LJL5	Herbaspirillum sp. SJZ130.	279	2572918
Lipoprotein	Bacteria	Proteobacteria	Betaproteobacteria	Burkholderiales	Oxalobacteraceae	Duganella	Duganella sp. DN04	A0A4Y9SJV0	Duganella sp. DN04.	273	2561932
Lipoprotein	Bacteria	Proteobacteria	Betaproteobacteria	Burkholderiales	Oxalobacteraceae	unclassified Oxalobacteraceae	Oxalobacteraceae bacterium OM1	A0A4Y9QNN3	Oxalobacteraceae bacterium OM1.	266	2561929
D-methionine transport system substrate-binding protein	Bacteria	Proteobacteria	Betaproteobacteria	Burkholderiales	Oxalobacteraceae	Herbaspirillum	Herbaspirillum seropedicae	A0A4R8NKA5	Herbaspirillum seropedicae.	283	964
Lipoprotein	Bacteria	Proteobacteria	Betaproteobacteria	Burkholderiales	Oxalobacteraceae	Herbaspirillum	Herbaspirillum seropedicae	A0A4R8NJB0	Herbaspirillum seropedicae.	273	964
MetQ/NlpA family ABC transporter substrate-binding protein	Bacteria	Proteobacteria	Betaproteobacteria	Burkholderiales	Oxalobacteraceae	unclassified Oxalobacteraceae	Oxalobacteraceae bacterium	A0A4Q3IRR4	Oxalobacteraceae bacterium.	271	1871070
Lipoprotein	Bacteria	Proteobacteria	Betaproteobacteria	Burkholderiales	Oxalobacteraceae	unclassified Oxalobacteraceae	Oxalobacteraceae bacterium CAVE-383	A0A4Q2J3P0	Oxalobacteraceae bacterium CAVE-383.	265	2478672
MetQ/NlpA family ABC transporter substrate-binding protein	Bacteria	Proteobacteria	Betaproteobacteria	Burkholderiales	Oxalobacteraceae	Herbaspirillum	Herbaspirillum huttiense	A0A4P7AEB5	Herbaspirillum huttiense.	246	863372
MetQ/NlpA family ABC transporter substrate-binding protein	Bacteria	Proteobacteria	Betaproteobacteria	Burkholderiales	Oxalobacteraceae	Herbaspirillum	Herbaspirillum huttiense	A0A4P7AA92	Herbaspirillum huttiense.	277	863372
MetQ/NlpA family ABC transporter substrate-binding protein	Bacteria	Proteobacteria	Betaproteobacteria	Burkholderiales	Oxalobacteraceae	Herbaspirillum	Herbaspirillum huttiense	A0A4P7A5B6	Herbaspirillum huttiense.	276	863372
Lipoprotein	Bacteria	Proteobacteria	Betaproteobacteria	Burkholderiales	Oxalobacteraceae	Massilia	Massilia lutea	A0A4P6L412	Massilia lutea.	279	321985
YaeC family lipoprotein	Bacteria	Proteobacteria	Betaproteobacteria	Burkholderiales	Oxalobacteraceae	Collimonas	Collimonas fungivorans	A0A419TR98	Collimonas fungivorans.	254	158899
Lipoprotein	Bacteria	Proteobacteria	Betaproteobacteria	Burkholderiales	Oxalobacteraceae	Massilia	Massilia albidiflava	A0A411X7Q6	Massilia albidiflava.	275	321983
Lipoprotein	Bacteria	Proteobacteria	Betaproteobacteria	Burkholderiales	Oxalobacteraceae	Duganella	Duganella sp. GV023	A0A3D9JTL6	Duganella sp. GV023.	272	2135490
Lipoprotein	Bacteria	Proteobacteria	Betaproteobacteria	Burkholderiales	Oxalobacteraceae	Massilia	Massilia sp.	A0A353HY21	Massilia sp.	274	1882437
Uncharacterized protein	Bacteria	Proteobacteria	Betaproteobacteria	Burkholderiales	Oxalobacteraceae	Massilia	Massilia sp.	A0A350CTU1	Massilia sp.	274	1882437
Dioxygenase	Bacteria	Proteobacteria	Betaproteobacteria	Burkholderiales	Oxalobacteraceae	Herbaspirillum	Herbaspirillum rubrisubalbicans	A0A328J682	Herbaspirillum rubrisubalbicans.	271	80842
Lipoprotein	Bacteria	Proteobacteria	Betaproteobacteria	Burkholderiales	Oxalobacteraceae	Undibacterium	Undibacterium pigrum	A0A318JJY3	Undibacterium pigrum.	270	401470
Lipoprotein	Bacteria	Proteobacteria	Betaproteobacteria	Burkholderiales	Oxalobacteraceae	Undibacterium	Undibacterium pigrum	A0A318ISG9	Undibacterium pigrum.	276	401470
Lipoprotein	Bacteria	Proteobacteria	Betaproteobacteria	Burkholderiales	Oxalobacteraceae	Glaciimonas	Glaciimonas sp. PCH181	A0A2T6FBQ5	Glaciimonas sp. PCH181.	271	2133943
Methionine ABC transporter substrate-binding protein	Bacteria	Proteobacteria	Betaproteobacteria	Burkholderiales	Oxalobacteraceae	Glaciimonas	Glaciimonas sp. PCH181	A0A2T6FAH5	Glaciimonas sp. PCH181.	264	2133943
Lipoprotein	Bacteria	Proteobacteria	Betaproteobacteria	Burkholderiales	Oxalobacteraceae	Glaciimonas	Glaciimonas sp. PCH181	A0A2T6F2F7	Glaciimonas sp. PCH181.	266	2133943
Lipoprotein	Bacteria	Proteobacteria	Betaproteobacteria	Burkholderiales	Oxalobacteraceae	Massilia	Massilia armeniaca	A0A2R4CCN4	Massilia armeniaca.	272	2072590
Lipoprotein	Bacteria	Proteobacteria	Betaproteobacteria	Burkholderiales	Oxalobacteraceae	Massilia	Massilia violaceinigra	A0A2D2DG45	Massilia violaceinigra.	275	2045208
Methionine ABC transporter substrate-binding protein	Bacteria	Proteobacteria	Betaproteobacteria	Burkholderiales	Oxalobacteraceae	Noviherbaspirillum	Noviherbaspirillum denitrificans	A0A254TPZ1	Noviherbaspirillum denitrificans.	263	1968433
Lipoprotein	Bacteria	Proteobacteria	Betaproteobacteria	Burkholderiales	Oxalobacteraceae	Noviherbaspirillum	Noviherbaspirillum denitrificans	A0A254TFS1	Noviherbaspirillum denitrificans.	278	1968433
Lipoprotein	Bacteria	Proteobacteria	Betaproteobacteria	Burkholderiales	Oxalobacteraceae	Herbaspirillum	Herbaspirillum robiniae	A0A246WVX8	Herbaspirillum robiniae.	269	2014887
Lipoprotein	Bacteria	Proteobacteria	Betaproteobacteria	Burkholderiales	Oxalobacteraceae	Herbaspirillum	Herbaspirillum robiniae	A0A246WVS9	Herbaspirillum robiniae.	271	2014887
Methionine-binding protein	Bacteria	Proteobacteria	Betaproteobacteria	Burkholderiales	Oxalobacteraceae	Herbaspirillum	Herbaspirillum robiniae	A0A246WMU1	Herbaspirillum robiniae.	275	2014887
Lipoprotein	Bacteria	Proteobacteria	Betaproteobacteria	Burkholderiales	Oxalobacteraceae	Herbaspirillum	Herbaspirillum robiniae	A0A246WL59	Herbaspirillum robiniae.	271	2014887
Methionine-binding protein	Bacteria	Proteobacteria	Betaproteobacteria	Burkholderiales	Oxalobacteraceae	Herbaspirillum	Herbaspirillum sp. meg3	A0A223PIA9	Herbaspirillum sp. meg3.	269	2025949
Methionine-binding protein	Bacteria	Proteobacteria	Betaproteobacteria	Burkholderiales	Oxalobacteraceae	Herbaspirillum	Herbaspirillum sp. VT-16-41	A0A1V2VM73	Herbaspirillum sp. VT-16-41.	284	1953765
Lipoprotein	Bacteria	Proteobacteria	Betaproteobacteria	Burkholderiales	Oxalobacteraceae	Janthinobacterium	Janthinobacterium sp. TND4EL3	A0A1N7B925	Janthinobacterium sp. TND4EL3.	275	1907311
Lipoprotein	Bacteria	Proteobacteria	Betaproteobacteria	Burkholderiales	Oxalobacteraceae	Duganella	Duganella sacchari	A0A1M7NX12	Duganella sacchari.	270	551987
Lipoprotein	Bacteria	Proteobacteria	Betaproteobacteria	Burkholderiales	Oxalobacteraceae	Massilia	Massilia sp. CF038	A0A1M5UH89	Massilia sp. CF038.	276	1881045
Lipoprotein	Bacteria	Proteobacteria	Betaproteobacteria	Burkholderiales	Oxalobacteraceae	Collimonas	Collimonas sp. OK307	A0A1I3I6V8	Collimonas sp. OK307.	294	1801620
Lipoprotein| YaeC family	Bacteria	Proteobacteria	Betaproteobacteria	Burkholderiales	Oxalobacteraceae	Collimonas	Collimonas sp. OK307	A0A1I3CF83	Collimonas sp. OK307.	244	1801620
Lipoprotein	Bacteria	Proteobacteria	Betaproteobacteria	Burkholderiales	Oxalobacteraceae	Duganella	Duganella sp. CF517	A0A1H8E907	Duganella sp. CF517.	282	1881038
Lipoprotein	Bacteria	Proteobacteria	Betaproteobacteria	Burkholderiales	Oxalobacteraceae	Duganella	Duganella sp. CF402	A0A1H7PM77	Duganella sp. CF402.	270	1855289
Lipoprotein	Bacteria	Proteobacteria	Betaproteobacteria	Burkholderiales	Oxalobacteraceae	Duganella	Duganella sp. OV458	A0A1G7V0A4	Duganella sp. OV458.	273	1855290
Lipoprotein	Bacteria	Proteobacteria	Betaproteobacteria	Burkholderiales	Oxalobacteraceae	Massilia	Massilia sp. PDC64	A0A1G6SYB9	Massilia sp. PDC64.	274	1881046
D-methionine-binding lipoprotein MetQ	Bacteria	Proteobacteria	Betaproteobacteria	Burkholderiales	Oxalobacteraceae	Duganella	Duganella phyllosphaerae	A0A1E7X5D4	Duganella phyllosphaerae.	289	762836
Lipoprotein	Bacteria	Proteobacteria	Betaproteobacteria	Burkholderiales	Oxalobacteraceae	Janthinobacterium	Janthinobacterium sp. S3-2	A0A1A7BYE2	Janthinobacterium sp. S3-2.	275	1747903
Lipoprotein	Bacteria	Proteobacteria	Betaproteobacteria	Burkholderiales	Oxalobacteraceae	Janthinobacterium	Janthinobacterium sp. S3-2	A0A1A7BY48	Janthinobacterium sp. S3-2.	275	1747903
Lipoprotein	Bacteria	Proteobacteria	Betaproteobacteria	Burkholderiales	Oxalobacteraceae	Collimonas	Collimonas arenae	A0A127QFQ9	Collimonas arenae.	284	279058
Lipoprotein	Bacteria	Proteobacteria	Betaproteobacteria	Burkholderiales	Oxalobacteraceae	Collimonas	Collimonas pratensis	A0A127Q2S4	Collimonas pratensis.	269	279113
Lipoprotein	Bacteria	Proteobacteria	Betaproteobacteria	Burkholderiales	Oxalobacteraceae	Collimonas	Collimonas pratensis	A0A127PZE2	Collimonas pratensis.	267	279113
NLPA lipofamily protein	Bacteria	Proteobacteria	Betaproteobacteria	Burkholderiales	Oxalobacteraceae	Collimonas	Collimonas pratensis	A0A127PX99	Collimonas pratensis.	250	279113
Methionine ABC transporter substrate-binding protein	Bacteria	Proteobacteria	Betaproteobacteria	Burkholderiales	Oxalobacteraceae	Janthinobacterium	Janthinobacterium sp. B9-8	A0A109RU53	Janthinobacterium sp. B9-8.	260	1236179
Methionine ABC transporter substrate-binding protein	Bacteria	Proteobacteria	Betaproteobacteria	Burkholderiales	Oxalobacteraceae	Janthinobacterium	Janthinobacterium sp. B9-8	A0A0X8GJN6	Janthinobacterium sp. B9-8.	257	1236179
Lipoprotein	Bacteria	Proteobacteria	Betaproteobacteria	Burkholderiales	Oxalobacteraceae	Herbaspirillum	Herbaspirillum rubrisubalbicans M1	A0A0U3KW32	Herbaspirillum rubrisubalbicans M1.	265	1078773
Lipoprotein	Bacteria	Proteobacteria	Betaproteobacteria	Burkholderiales	Oxalobacteraceae	Herbaspirillum	Herbaspirillum rubrisubalbicans M1	A0A0U3AR83	Herbaspirillum rubrisubalbicans M1.	271	1078773
ABC-type metal ion transport system protein	Bacteria	Proteobacteria	Betaproteobacteria	Burkholderiales	Oxalobacteraceae	Herbaspirillum	Herbaspirillum rubrisubalbicans M1	A0A0U2SDK2	Herbaspirillum rubrisubalbicans M1.	263	1078773
Lipoprotein	Bacteria	Proteobacteria	Betaproteobacteria	Burkholderiales	Oxalobacteraceae	Duganella	Duganella sp. Root198D2	A0A0Q8QE81	Duganella sp. Root198D2.	275	1736489
Methionine ABC transporter substrate-binding protein	Bacteria	Proteobacteria	Betaproteobacteria	Burkholderiales	Oxalobacteraceae	Noviherbaspirillum	Noviherbaspirillum sp. Root189	A0A0Q8PAQ2	Noviherbaspirillum sp. Root189.	262	1736487
Lipoprotein	Bacteria	Proteobacteria	Betaproteobacteria	Burkholderiales	Oxalobacteraceae	Massilia	Massilia sp. Root418	A0A0Q7F730	Massilia sp. Root418.	287	1736532
Lipoprotein	Bacteria	Proteobacteria	Betaproteobacteria	Burkholderiales	Oxalobacteraceae	Duganella	Duganella sp. Leaf126	A0A0Q5D6B4	Duganella sp. Leaf126.	290	1736266
Lipoprotein	Bacteria	Proteobacteria	Betaproteobacteria	Burkholderiales	Oxalobacteraceae	Duganella	Duganella sp. Leaf61	A0A0Q4P6H2	Duganella sp. Leaf61.	286	1736227
Lipoprotein	Bacteria	Proteobacteria	Betaproteobacteria	Burkholderiales	Oxalobacteraceae	Janthinobacterium	Janthinobacterium sp. KBS0711	A0A0M2WIH6	Janthinobacterium sp. KBS0711.	275	1649647
Methionine ABC transporter ATPase	Bacteria	Proteobacteria	Betaproteobacteria	Burkholderiales	Oxalobacteraceae	Massilia	Massilia sp. NR 4-1	A0A0K1JU12	Massilia sp. NR 4-1.	280	1678028
Methionine ABC transporter substrate-binding protein	Bacteria	Proteobacteria	Betaproteobacteria	Burkholderiales	Oxalobacteraceae	Noviherbaspirillum	Noviherbaspirillum autotrophicum	A0A0C2BKA1	Noviherbaspirillum autotrophicum.	263	709839
Lipoprotein	Bacteria	Proteobacteria	Betaproteobacteria	Burkholderiales	Oxalobacteraceae	Collimonas	Collimonas arenae	A0A0A1F5D7	Collimonas arenae.	267	279058
Lipoprotein	Bacteria	Proteobacteria	Betaproteobacteria	Burkholderiales	Oxalobacteraceae	Janthinobacterium	Janthinobacterium lividum	A0A031GIS0	Janthinobacterium lividum.	275	29581
Methionine ABC transporter substrate-binding protein	Bacteria	Proteobacteria	Betaproteobacteria	Neisseriales	Neisseriaceae	Snodgrassella	Snodgrassella alvi wkB2	X2HDQ1	Snodgrassella alvi wkB2.	276	1196094	y
Methionine ABC transporter substrate-binding protein	Bacteria	Proteobacteria	Betaproteobacteria	Neisseriales	Neisseriaceae	Snodgrassella	Snodgrassella alvi wkB2	X2HBK2	Snodgrassella alvi wkB2.	280	1196094	y
Lipoprotein	Bacteria	Proteobacteria	Betaproteobacteria	Neisseriales	Neisseriaceae	Snodgrassella	Snodgrassella alvi wkB2	X2HB50	Snodgrassella alvi wkB2.	280	1196094	y
Methionine ABC transporter substrate-binding protein	Bacteria	Proteobacteria	Betaproteobacteria	Neisseriales	Neisseriaceae	Snodgrassella	Snodgrassella alvi wkB2	X2H4N5	Snodgrassella alvi wkB2.	288	1196094	y
YaeC family lipoprotein	Bacteria	Proteobacteria	Betaproteobacteria	Neisseriales	Neisseriaceae	Simonsiella	Simonsiella muelleri ATCC 29453	V9HDR3	Simonsiella muelleri ATCC 29453.	304	641147	y
Lipoprotein	Bacteria	Proteobacteria	Betaproteobacteria	Neisseriales	Neisseriaceae	Neisseria	Neisseria gonorrhoeae	Q9K360	Neisseria gonorrhoeae.	288	485	y
Lipoprotein	Bacteria	Proteobacteria	Betaproteobacteria	Neisseriales	Neisseriaceae	Neisseria	Neisseria meningitidis	Q9JPG4	Neisseria meningitidis.	287	487	y
NLPA lipoprotein	Bacteria	Proteobacteria	Betaproteobacteria	Neisseriales	Neisseriaceae	Neisseria	Neisseria sp. oral taxon 020 str. F0370	L1P1B3	Neisseria sp. oral taxon 020 str. F0370.	303	1127694	y
Methionine ABC superfamily ATP binding cassette transporter| binding protein	Bacteria	Proteobacteria	Betaproteobacteria	Neisseriales	Neisseriaceae	Neisseria	Neisseria wadsworthii 9715	G4CPB6	Neisseria wadsworthii 9715.	308	1030841	y
Methionine ABC superfamily ATP binding cassette transporter| binding protein	Bacteria	Proteobacteria	Betaproteobacteria	Neisseriales	Neisseriaceae	Neisseria	Neisseria shayeganii 871	G4CGU6	Neisseria shayeganii 871.	303	1032488	y
Methionine ABC superfamily ATP binding cassette transporter| binding protein	Bacteria	Proteobacteria	Betaproteobacteria	Neisseriales	Neisseriaceae	Kingella	Kingella kingae ATCC 23330	F5S8V7	Kingella kingae ATCC 23330.	308	887327	y
Lipoprotein	Bacteria	Proteobacteria	Betaproteobacteria	Neisseriales	Neisseriaceae	Neisseria	Neisseria bacilliformis ATCC BAA-1200	F2BF68	Neisseria bacilliformis ATCC BAA-1200.	301	888742	y
NLPA lipoprotein	Bacteria	Proteobacteria	Betaproteobacteria	Neisseriales	Neisseriaceae	Kingella	Kingella oralis ATCC 51147	C4GMQ2	Kingella oralis ATCC 51147.	304	629741	y
Uncharacterized protein	Bacteria	Proteobacteria	Betaproteobacteria	Neisseriales	Neisseriaceae	Neisseria	Neisseria zalophi	A0A5J6PTN0	Neisseria zalophi.	311	640030	y
Lipoprotein	Bacteria	Proteobacteria	Betaproteobacteria	Neisseriales	Neisseriaceae	Neisseria	Neisseria sp. WF04	A0A4Y9GK59	Neisseria sp. WF04.	302	2558283	y
D-methionine transport system substrate-binding protein	Bacteria	Proteobacteria	Betaproteobacteria	Neisseriales	Neisseriaceae	Uruburuella	Uruburuella suis	A0A4V2SGN8	Uruburuella suis.	305	252130	y
Lipoprotein	Bacteria	Proteobacteria	Betaproteobacteria	Neisseriales	Neisseriaceae	Crenobacter	Crenobacter sp. GY 70310	A0A4T0UXZ4	Crenobacter sp. GY 70310.	269	2563443
Outer membrane lipoprotein GNA1946	Bacteria	Proteobacteria	Betaproteobacteria	Neisseriales	Neisseriaceae	Neisseria	Neisseria weaveri	A0A448VKS0	Neisseria weaveri.	307	28091	y
MetQ/NlpA family ABC transporter substrate-binding protein	Bacteria	Proteobacteria	Betaproteobacteria	Neisseriales	Neisseriaceae	unclassified Neisseriaceae	Neisseriaceae bacterium	A0A431J1D7	Neisseriaceae bacterium.	264	2014784
Lipoprotein	Bacteria	Proteobacteria	Betaproteobacteria	Neisseriales	Neisseriaceae	unclassified Neisseriaceae	Neisseriaceae bacterium	A0A431HKZ1	Neisseriaceae bacterium.	267	2014784
Lipoprotein	Bacteria	Proteobacteria	Betaproteobacteria	Neisseriales	Neisseriaceae	unclassified Neisseriaceae	Neisseriaceae bacterium	A0A3S0DZ17	Neisseriaceae bacterium.	267	2014784
Uncharacterized protein	Bacteria	Proteobacteria	Betaproteobacteria	Neisseriales	Neisseriaceae	unclassified Neisseriaceae	Neisseriaceae bacterium	A0A3S0CL58	Neisseriaceae bacterium.	282	2014784
Uncharacterized protein	Bacteria	Proteobacteria	Betaproteobacteria	Neisseriales	Neisseriaceae	Conchiformibius	Conchiformibius steedae	A0A3P2A7D8	Conchiformibius steedae.	311	153493	y
Uncharacterized protein	Bacteria	Proteobacteria	Betaproteobacteria	Neisseriales	Neisseriaceae	Neisseria	Neisseria animalis	A0A3N3EDA7	Neisseria animalis.	304	492	y
Outer membrane lipoprotein GNA1946	Bacteria	Proteobacteria	Betaproteobacteria	Neisseriales	Neisseriaceae	Neisseria	Neisseria zoodegmatis	A0A378WT51	Neisseria zoodegmatis.	309	326523	y
Outer membrane lipoprotein GNA1946	Bacteria	Proteobacteria	Betaproteobacteria	Neisseriales	Neisseriaceae	Neisseria	Neisseria elongata	A0A378TX48	Neisseria elongata.	308	495	y
D-methionine-binding lipoprotein metQ	Bacteria	Proteobacteria	Betaproteobacteria	Neisseriales	Neisseriaceae	Alysiella	Alysiella crassa	A0A376BN74	Alysiella crassa.	306	153491	y
Lipoprotein	Bacteria	Proteobacteria	Betaproteobacteria	Neisseriales	Neisseriaceae	Rivicola	Rivicola pingtungensis	A0A318KH07	Rivicola pingtungensis.	269	1054498
Uncharacterized protein	Bacteria	Proteobacteria	Betaproteobacteria	Neisseriales	Neisseriaceae	Neisseria	Neisseria iguanae	A0A2P7U1P1	Neisseria iguanae.	314	90242	y
Lipoprotein	Bacteria	Proteobacteria	Betaproteobacteria	Neisseriales	Neisseriaceae	Snodgrassella	Snodgrassella alvi	A0A2N9XLV0	Snodgrassella alvi.	290	1196083	y
Uncharacterized protein	Bacteria	Proteobacteria	Betaproteobacteria	Neisseriales	Neisseriaceae	Snodgrassella	Snodgrassella alvi	A0A2N9XLR7	Snodgrassella alvi.	275	1196083
Lipoprotein	Bacteria	Proteobacteria	Betaproteobacteria	Neisseriales	Neisseriaceae	Snodgrassella	Snodgrassella alvi	A0A2N9X6T3	Snodgrassella alvi.	286	1196083	y
Metal ABC transporter substrate-binding protein	Bacteria	Proteobacteria	Betaproteobacteria	Neisseriales	Neisseriaceae	Snodgrassella	Snodgrassella alvi	A0A2N9X650	Snodgrassella alvi.	270	1196083	y
Uncharacterized protein	Bacteria	Proteobacteria	Betaproteobacteria	Neisseriales	Neisseriaceae	Snodgrassella	Snodgrassella alvi	A0A2N9X2Q4	Snodgrassella alvi.	277	1196083	y
Lipoprotein NlpA	Bacteria	Proteobacteria	Betaproteobacteria	Neisseriales	Neisseriaceae	Vitreoscilla	Vitreoscilla sp. C1	A0A2L0PIS6	Vitreoscilla sp. (strain C1)	307	96942	y
Uncharacterized protein	Bacteria	Proteobacteria	Betaproteobacteria	Neisseriales	Neisseriaceae	unclassified Neisseriaceae	Neisseriaceae bacterium DSM 100970	A0A2I7N8S9	Neisseriaceae bacterium DSM 100970.	287	2052837
Methionine ABC transporter substrate-binding protein	Bacteria	Proteobacteria	Betaproteobacteria	Neisseriales	Neisseriaceae	unclassified Neisseriaceae	Neisseriaceae bacterium DSM 100970	A0A2I7N7Y0	Neisseriaceae bacterium DSM 100970.	279	2052837
Lipoprotein	Bacteria	Proteobacteria	Betaproteobacteria	Neisseriales	Neisseriaceae	unclassified Neisseriaceae	Neisseriaceae bacterium DSM 100970	A0A2I7N6Z5	Neisseriaceae bacterium DSM 100970.	268	2052837
D-methionine transport system substrate-binding protein	Bacteria	Proteobacteria	Betaproteobacteria	Neisseriales	Neisseriaceae	Alysiella	Alysiella filiformis DSM 16848	A0A286E384	Alysiella filiformis DSM 16848.	307	1120981	y
D-methionine-binding lipoprotein MetQ	Bacteria	Proteobacteria	Betaproteobacteria	Neisseriales	Neisseriaceae	Kingella	Kingella negevensis	A0A238TEU1	Kingella negevensis.	314	1522312	y
Uncharacterized protein	Bacteria	Proteobacteria	Betaproteobacteria	Neisseriales	Neisseriaceae	Neisseria	Neisseria chenwenguii	A0A220S3A5	Neisseria chenwenguii.	304	1853278	y
Outer membrane lipoprotein GNA1946	Bacteria	Proteobacteria	Betaproteobacteria	Neisseriales	Neisseriaceae	Neisseria	Neisseria animaloris	A0A1X3CMH5	Neisseria animaloris.	303	326522	y
Lipoprotein	Bacteria	Proteobacteria	Betaproteobacteria	Neisseriales	Neisseriaceae	Neisseria	Neisseria lactamica	A0A1V0DSW7	Neisseria lactamica.	287	486	y
Lipoprotein	Bacteria	Proteobacteria	Betaproteobacteria	Neisseriales	Neisseriaceae	Eikenella	Eikenella sp. NML02-A-017	A0A1A9RUP3	Eikenella sp. NML02-A-017.	300	1795827	y
Methionine ABC transporter substrate-binding protein	Bacteria	Proteobacteria	Betaproteobacteria	Neisseriales	Neisseriaceae	Crenobacter	Crenobacter luteus	A0A165FE49	Crenobacter luteus.	258	1452487
Putative D-methionine-binding lipoprotein MetQ	Bacteria	Proteobacteria	Betaproteobacteria	Neisseriales	Neisseriaceae	Amantichitinum	Amantichitinum ursilacus	A0A0N0XFY7	Amantichitinum ursilacus.	253	857265
Lipoprotein 28	Bacteria	Proteobacteria	Betaproteobacteria	Neisseriales	Neisseriaceae	Amantichitinum	Amantichitinum ursilacus	A0A0N0GKR3	Amantichitinum ursilacus.	257	857265
Membrane protein	Bacteria	Proteobacteria	Betaproteobacteria	Neisseriales	Neisseriaceae	Neisseria	Neisseria arctica	A0A0J0YSS6	Neisseria arctica.	305	1470200	y
Lipoprotein	Bacteria	Proteobacteria	Betaproteobacteria	Neisseriales	Neisseriaceae	Snodgrassella	Snodgrassella alvi SCGC AB-598-O02	A0A081Y0N3	Snodgrassella alvi SCGC AB-598-O02.	288	1443103	y
Lipoprotein	Bacteria	Proteobacteria	Betaproteobacteria	Neisseriales	Neisseriaceae	Snodgrassella	Snodgrassella alvi SCGC AB-598-O02	A0A080JVR3	Snodgrassella alvi SCGC AB-598-O02.	283	1443103	y
Lipoprotein	Bacteria	Proteobacteria	Betaproteobacteria	Neisseriales	Neisseriaceae	Snodgrassella	Snodgrassella alvi	A0A066TLS6	Snodgrassella alvi.	280	1196083
Metal ABC transporter substrate-binding protein	Bacteria	Proteobacteria	Betaproteobacteria	Neisseriales	Neisseriaceae	Snodgrassella	Snodgrassella alvi	A0A066TH38	Snodgrassella alvi.	270	1196083	y
Methionine ABC transporter substrate-binding protein	Bacteria	Proteobacteria	Betaproteobacteria	Neisseriales	Neisseriaceae	Snodgrassella	Snodgrassella alvi	A0A066TAX0	Snodgrassella alvi.	277	1196083	y
Lipoprotein YaeC	Bacteria	Proteobacteria	Betaproteobacteria	Burkholderiales	Comamonadaceae	Rhodoferax	Rhodoferax ferrireducens T118	Q21XK4	Rhodoferax ferrireducens (strain ATCC BAA-621 / DSM 15236 / T118)	264	338969
NLPA lipoprotein	Bacteria	Proteobacteria	Betaproteobacteria	Burkholderiales	Comamonadaceae	Polaromonas	Polaromonas sp. JS666	Q12B02	Polaromonas sp. (strain JS666 / ATCC BAA-500)	246	296591
Lipoprotein| YaeC family	Bacteria	Proteobacteria	Betaproteobacteria	Burkholderiales	Comamonadaceae	Polaromonas	Polaromonas sp. CF318	J2TWE8	Polaromonas sp. CF318.	264	1144318
Lipoprotein	Bacteria	Proteobacteria	Betaproteobacteria	Burkholderiales	Comamonadaceae	Variovorax	Variovorax sp. CF313	J2T3F6	Variovorax sp. CF313.	284	1144315
Lipoprotein	Bacteria	Proteobacteria	Betaproteobacteria	Burkholderiales	Comamonadaceae	Hylemonella	Hylemonella gracilis ATCC 19624	F3KXK2	Hylemonella gracilis ATCC 19624.	274	887062
D-methionine binding lipoprotein| ABC-type metal ion transport system	Bacteria	Proteobacteria	Betaproteobacteria	Burkholderiales	Comamonadaceae	Hylemonella	Hylemonella gracilis ATCC 19624	F3KR20	Hylemonella gracilis ATCC 19624.	272	887062
NLPA lipoprotein	Bacteria	Proteobacteria	Betaproteobacteria	Burkholderiales	Comamonadaceae	Hylemonella	Hylemonella gracilis ATCC 19624	F3KR19	Hylemonella gracilis ATCC 19624.	269	887062
D-methionine binding lipoprotein| ABC-type metal ion transport system	Bacteria	Proteobacteria	Betaproteobacteria	Burkholderiales	Comamonadaceae	Hylemonella	Hylemonella gracilis ATCC 19624	F3KR18	Hylemonella gracilis ATCC 19624.	269	887062
D-methionine binding lipoprotein| ABC-type metal ion transport system	Bacteria	Proteobacteria	Betaproteobacteria	Burkholderiales	Comamonadaceae	Hylemonella	Hylemonella gracilis ATCC 19624	F3KR17	Hylemonella gracilis ATCC 19624.	275	887062
NLPA lipoprotein	Bacteria	Proteobacteria	Betaproteobacteria	Burkholderiales	Comamonadaceae	Acidovorax	Acidovorax avenae subsp. avenae ATCC 19860	F0Q7H9	Acidovorax avenae (strain ATCC 19860 / DSM 7227 / JCM 20985 / NCPPB 1011)	276	643561
Lipoprotein	Bacteria	Proteobacteria	Betaproteobacteria	Burkholderiales	Comamonadaceae	Comamonas	Comamonas testosteroni CNB-2	D0J4P2	Comamonas testosteroni (strain CNB-2)	290	688245
Lipoprotein| YaeC family	Bacteria	Proteobacteria	Betaproteobacteria	Burkholderiales	Comamonadaceae	Acidovorax	Acidovorax delafieldii 2AN	C5TAY5	Acidovorax delafieldii 2AN.	261	573060
Lipoprotein	Bacteria	Proteobacteria	Betaproteobacteria	Burkholderiales	Comamonadaceae	Acidovorax	Acidovorax delafieldii 2AN	C5T4M2	Acidovorax delafieldii 2AN.	265	573060
Lipoprotein	Bacteria	Proteobacteria	Betaproteobacteria	Burkholderiales	Comamonadaceae	Variovorax	Variovorax paradoxus S110	C5CVA4	Variovorax paradoxus (strain S110)	286	543728
Lipoprotein	Bacteria	Proteobacteria	Betaproteobacteria	Burkholderiales	Comamonadaceae	Comamonas	Comamonas testosteroni KF-1	B7X335	Comamonas testosteroni (strain DSM 14576 / KF-1)	280	399795
Lipoprotein	Bacteria	Proteobacteria	Betaproteobacteria	Burkholderiales	Comamonadaceae	Delftia	Delftia acidovorans SPH-1	A9C3B4	Delftia acidovorans (strain DSM 14801 / SPH-1)	276	398578
NLPA lipoprotein	Bacteria	Proteobacteria	Betaproteobacteria	Burkholderiales	Comamonadaceae	Delftia	Delftia acidovorans SPH-1	A9BUW3	Delftia acidovorans (strain DSM 14801 / SPH-1)	264	398578
Lipoprotein| YaeC family	Bacteria	Proteobacteria	Betaproteobacteria	Burkholderiales	Comamonadaceae	Acidovorax	Acidovorax sp. JS42	A1WAL0	Acidovorax sp. (strain JS42)	261	232721
Lipoprotein	Bacteria	Proteobacteria	Betaproteobacteria	Burkholderiales	Comamonadaceae	Acidovorax	Acidovorax sp. JS42	A1W8C8	Acidovorax sp. (strain JS42)	266	232721
Lipoprotein	Bacteria	Proteobacteria	Betaproteobacteria	Burkholderiales	Comamonadaceae	Ottowia	Ottowia sp. GY511	A0A5C8J3K9	Ottowia sp. GY511.	270	2603274
Lipoprotein	Bacteria	Proteobacteria	Betaproteobacteria	Burkholderiales	Comamonadaceae	Comamonas	Comamonas sp. NLF-7-7	A0A5B8RVD1	Comamonas sp. NLF-7-7.	266	2597701
Methionine-binding protein	Bacteria	Proteobacteria	Betaproteobacteria	Burkholderiales	Comamonadaceae	Variovorax	Variovorax sp.	A0A521P5T6	Variovorax sp.	272	1871043
Lipoprotein	Bacteria	Proteobacteria	Betaproteobacteria	Burkholderiales	Comamonadaceae	Variovorax	Variovorax sp.	A0A521P1K2	Variovorax sp.	268	1871043
Lipoprotein	Bacteria	Proteobacteria	Betaproteobacteria	Burkholderiales	Comamonadaceae	Variovorax	Variovorax sp.	A0A520H1S1	Variovorax sp.	278	1871043
Methionine-binding protein	Bacteria	Proteobacteria	Betaproteobacteria	Burkholderiales	Comamonadaceae	Variovorax	Variovorax sp.	A0A520H1Q7	Variovorax sp.	278	1871043
Metal ABC transporter substrate-binding protein	Bacteria	Proteobacteria	Betaproteobacteria	Burkholderiales	Comamonadaceae	Variovorax	Variovorax sp.	A0A520GZ89	Variovorax sp.	274	1871043
Lipoprotein	Bacteria	Proteobacteria	Betaproteobacteria	Burkholderiales	Comamonadaceae	Variovorax	Variovorax sp.	A0A520GUB7	Variovorax sp.	275	1871043
Lipoprotein	Bacteria	Proteobacteria	Betaproteobacteria	Burkholderiales	Comamonadaceae	Variovorax	Variovorax sp.	A0A520DDP4	Variovorax sp.	274	1871043
Lipoprotein	Bacteria	Proteobacteria	Betaproteobacteria	Burkholderiales	Comamonadaceae	Variovorax	Variovorax sp.	A0A519ERZ3	Variovorax sp.	274	1871043
Lipoprotein	Bacteria	Proteobacteria	Betaproteobacteria	Burkholderiales	Comamonadaceae	Variovorax	Variovorax sp.	A0A519ERZ2	Variovorax sp.	273	1871043
Lipoprotein	Bacteria	Proteobacteria	Betaproteobacteria	Burkholderiales	Comamonadaceae	Ramlibacter	Ramlibacter sp. 18x22-1	A0A4Z0BEX7	Ramlibacter sp. 18x22-1.	265	2530451
Iron ABC transporter substrate-binding protein	Bacteria	Proteobacteria	Betaproteobacteria	Burkholderiales	Comamonadaceae	Lampropedia	Lampropedia puyangensis	A0A4S8F964	Lampropedia puyangensis.	278	1330072
MetQ/NlpA family ABC transporter substrate-binding protein	Bacteria	Proteobacteria	Betaproteobacteria	Burkholderiales	Comamonadaceae	Lampropedia	Lampropedia puyangensis	A0A4S8F422	Lampropedia puyangensis.	272	1330072
Lipoprotein	Bacteria	Proteobacteria	Betaproteobacteria	Burkholderiales	Comamonadaceae	Lampropedia	Lampropedia puyangensis	A0A4S8F2L2	Lampropedia puyangensis.	270	1330072
MetQ/NlpA family ABC transporter substrate-binding protein	Bacteria	Proteobacteria	Betaproteobacteria	Burkholderiales	Comamonadaceae	Lampropedia	Lampropedia puyangensis	A0A4S8F018	Lampropedia puyangensis.	278	1330072
ABC transporter substrate-binding protein	Bacteria	Proteobacteria	Betaproteobacteria	Burkholderiales	Comamonadaceae	Lampropedia	Lampropedia puyangensis	A0A4S8EZU7	Lampropedia puyangensis.	261	1330072
MetQ/NlpA family ABC transporter substrate-binding protein	Bacteria	Proteobacteria	Betaproteobacteria	Burkholderiales	Comamonadaceae	Lampropedia	Lampropedia puyangensis	A0A4S8EZC5	Lampropedia puyangensis.	261	1330072
MetQ/NlpA family ABC transporter substrate-binding protein	Bacteria	Proteobacteria	Betaproteobacteria	Burkholderiales	Comamonadaceae	Lampropedia	Lampropedia puyangensis	A0A4S8EZA5	Lampropedia puyangensis.	271	1330072
MetQ/NlpA family ABC transporter substrate-binding protein	Bacteria	Proteobacteria	Betaproteobacteria	Burkholderiales	Comamonadaceae	Lampropedia	Lampropedia puyangensis	A0A4S8EYI2	Lampropedia puyangensis.	293	1330072
Lipoprotein	Bacteria	Proteobacteria	Betaproteobacteria	Burkholderiales	Comamonadaceae	Lampropedia	Lampropedia puyangensis	A0A4S8EYE9	Lampropedia puyangensis.	286	1330072
MetQ/NlpA family ABC transporter substrate-binding protein	Bacteria	Proteobacteria	Betaproteobacteria	Burkholderiales	Comamonadaceae	Lampropedia	Lampropedia sp. YIM MLB12	A0A4S5BQM1	Lampropedia sp. YIM MLB12.	272	2562762
Iron ABC transporter substrate-binding protein	Bacteria	Proteobacteria	Betaproteobacteria	Burkholderiales	Comamonadaceae	Lampropedia	Lampropedia sp. YIM MLB12	A0A4S5BLH3	Lampropedia sp. YIM MLB12.	279	2562762
ABC transporter substrate-binding protein	Bacteria	Proteobacteria	Betaproteobacteria	Burkholderiales	Comamonadaceae	Lampropedia	Lampropedia sp. YIM MLB12	A0A4S5BK74	Lampropedia sp. YIM MLB12.	261	2562762
MetQ/NlpA family ABC transporter substrate-binding protein	Bacteria	Proteobacteria	Betaproteobacteria	Burkholderiales	Comamonadaceae	Lampropedia	Lampropedia sp. YIM MLB12	A0A4S5BI87	Lampropedia sp. YIM MLB12.	271	2562762
MetQ/NlpA family ABC transporter substrate-binding protein	Bacteria	Proteobacteria	Betaproteobacteria	Burkholderiales	Comamonadaceae	Lampropedia	Lampropedia sp. YIM MLB12	A0A4S5BI83	Lampropedia sp. YIM MLB12.	272	2562762
D-methionine transport system substrate-binding protein	Bacteria	Proteobacteria	Betaproteobacteria	Burkholderiales	Comamonadaceae	Comamonas	Comamonas sp. JUb58	A0A4R7G1F9	Comamonas sp. JUb58.	262	2485114
D-methionine transport system substrate-binding protein	Bacteria	Proteobacteria	Betaproteobacteria	Burkholderiales	Comamonadaceae	Comamonas	Comamonas sp. JUb58	A0A4R7G043	Comamonas sp. JUb58.	276	2485114
Lipoprotein	Bacteria	Proteobacteria	Betaproteobacteria	Burkholderiales	Comamonadaceae	Comamonas	Comamonas sp. JUb58	A0A4R7FDQ3	Comamonas sp. JUb58.	272	2485114
D-methionine transport system substrate-binding protein	Bacteria	Proteobacteria	Betaproteobacteria	Burkholderiales	Comamonadaceae	Kinneretia	Kinneretia asaccharophila	A0A4R6NCT9	Kinneretia asaccharophila.	257	582607
Lipoprotein	Bacteria	Proteobacteria	Betaproteobacteria	Burkholderiales	Comamonadaceae	Simplicispira	Simplicispira metamorpha	A0A4R2NCB1	Simplicispira metamorpha.	272	80881
Lipoprotein	Bacteria	Proteobacteria	Betaproteobacteria	Burkholderiales	Comamonadaceae	Simplicispira	Simplicispira metamorpha	A0A4R2N5N1	Simplicispira metamorpha.	265	80881
Lipoprotein	Bacteria	Proteobacteria	Betaproteobacteria	Burkholderiales	Comamonadaceae	Simplicispira	Simplicispira metamorpha	A0A4R2MR26	Simplicispira metamorpha.	275	80881
Lipoprotein	Bacteria	Proteobacteria	Betaproteobacteria	Burkholderiales	Comamonadaceae	Variovorax	Variovorax sp. BK119	A0A4Q7SSC2	Variovorax sp. BK119.	266	2512129
Lipoprotein	Bacteria	Proteobacteria	Betaproteobacteria	Burkholderiales	Comamonadaceae	Variovorax	Variovorax sp. BK119	A0A4Q7SRP9	Variovorax sp. BK119.	274	2512129
Lipoprotein	Bacteria	Proteobacteria	Betaproteobacteria	Burkholderiales	Comamonadaceae	Variovorax	Variovorax sp. BK119	A0A4Q7SPJ8	Variovorax sp. BK119.	270	2512129	y
Lipoprotein	Bacteria	Proteobacteria	Betaproteobacteria	Burkholderiales	Comamonadaceae	Variovorax	Variovorax sp. BK119	A0A4Q7SPH0	Variovorax sp. BK119.	282	2512129
MetQ/NlpA family ABC transporter substrate-binding protein	Bacteria	Proteobacteria	Betaproteobacteria	Burkholderiales	Comamonadaceae	unclassified Comamonadaceae	Comamonadaceae bacterium	A0A4Q5PV30	Comamonadaceae bacterium.	264	1871071
Metal ABC transporter substrate-binding protein	Bacteria	Proteobacteria	Betaproteobacteria	Burkholderiales	Comamonadaceae	unclassified Comamonadaceae	Comamonadaceae bacterium	A0A4Q3R3Y5	Comamonadaceae bacterium.	270	1871071
Lipoprotein	Bacteria	Proteobacteria	Betaproteobacteria	Burkholderiales	Comamonadaceae	unclassified Comamonadaceae	Comamonadaceae bacterium	A0A4Q3PI30	Comamonadaceae bacterium.	273	1871071
Iron ABC transporter substrate-binding protein	Bacteria	Proteobacteria	Betaproteobacteria	Burkholderiales	Comamonadaceae	unclassified Comamonadaceae	Comamonadaceae bacterium	A0A4Q3PE32	Comamonadaceae bacterium.	276	1871071
Lipoprotein	Bacteria	Proteobacteria	Betaproteobacteria	Burkholderiales	Comamonadaceae	unclassified Comamonadaceae	Comamonadaceae bacterium	A0A4Q3NTB7	Comamonadaceae bacterium.	274	1871071
Iron ABC transporter substrate-binding protein	Bacteria	Proteobacteria	Betaproteobacteria	Burkholderiales	Comamonadaceae	unclassified Comamonadaceae	Comamonadaceae bacterium	A0A4Q3M9B4	Comamonadaceae bacterium.	270	1871071
Lipoprotein	Bacteria	Proteobacteria	Betaproteobacteria	Burkholderiales	Comamonadaceae	unclassified Comamonadaceae	Comamonadaceae bacterium	A0A4Q3KS45	Comamonadaceae bacterium.	265	1871071
Lipoprotein	Bacteria	Proteobacteria	Betaproteobacteria	Burkholderiales	Comamonadaceae	unclassified Comamonadaceae	Comamonadaceae bacterium	A0A4Q3KDB6	Comamonadaceae bacterium.	272	1871071
Lipoprotein	Bacteria	Proteobacteria	Betaproteobacteria	Burkholderiales	Comamonadaceae	unclassified Comamonadaceae	Comamonadaceae bacterium	A0A4Q3KD25	Comamonadaceae bacterium.	275	1871071
Uncharacterized protein	Bacteria	Proteobacteria	Betaproteobacteria	Burkholderiales	Comamonadaceae	unclassified Comamonadaceae	Comamonadaceae bacterium	A0A4P5U247	Comamonadaceae bacterium.	268	1871071
Methionine-binding protein	Bacteria	Proteobacteria	Betaproteobacteria	Burkholderiales	Comamonadaceae	Variovorax	Variovorax guangxiensis	A0A433MTG6	Variovorax guangxiensis.	277	1775474
MetQ/NlpA family ABC transporter substrate-binding protein	Bacteria	Proteobacteria	Betaproteobacteria	Burkholderiales	Comamonadaceae	Curvibacter	Curvibacter sp.	A0A433BLY8	Curvibacter sp.	264	1888168
Lipoprotein	Bacteria	Proteobacteria	Betaproteobacteria	Burkholderiales	Comamonadaceae	Variovorax	Variovorax sp. DXTD-1	A0A3R9Z9L2	Variovorax sp. DXTD-1.	272	2495592
ABC transporter substrate-binding protein	Bacteria	Proteobacteria	Betaproteobacteria	Burkholderiales	Comamonadaceae	unclassified Comamonadaceae	Comamonadaceae bacterium OH2310_COT-174	A0A3P1Y6U6	Comamonadaceae bacterium OH2310_COT-174.	264	2491056
MetQ/NlpA family ABC transporter substrate-binding protein	Bacteria	Proteobacteria	Betaproteobacteria	Burkholderiales	Comamonadaceae	unclassified Comamonadaceae	Comamonadaceae bacterium OH2545_COT-014	A0A3P1XDZ1	Comamonadaceae bacterium OH2545_COT-014.	265	2491057
MetQ/NlpA family ABC transporter substrate-binding protein	Bacteria	Proteobacteria	Betaproteobacteria	Burkholderiales	Comamonadaceae	unclassified Comamonadaceae	Comamonadaceae bacterium OH2545_COT-014	A0A3P1XCA8	Comamonadaceae bacterium OH2545_COT-014.	265	2491057
Lipoprotein	Bacteria	Proteobacteria	Betaproteobacteria	Burkholderiales	Comamonadaceae	Comamonas	Comamonas sp. BIGb0124	A0A3N1X735	Comamonas sp. BIGb0124.	272	2485130
Lipoprotein	Bacteria	Proteobacteria	Betaproteobacteria	Burkholderiales	Comamonadaceae	Comamonas	Comamonas sp. BIGb0124	A0A3N1WRH7	Comamonas sp. BIGb0124.	271	2485130
Lipoprotein	Bacteria	Proteobacteria	Betaproteobacteria	Burkholderiales	Comamonadaceae	Corticibacter	Corticibacter populi	A0A3M6QYW0	Corticibacter populi.	293	1550736
MetQ/NlpA family ABC transporter substrate-binding protein	Bacteria	Proteobacteria	Betaproteobacteria	Burkholderiales	Comamonadaceae	Corticibacter	Corticibacter populi	A0A3M6QXP0	Corticibacter populi.	275	1550736
MetQ/NlpA family ABC transporter substrate-binding protein	Bacteria	Proteobacteria	Betaproteobacteria	Burkholderiales	Comamonadaceae	Corticibacter	Corticibacter populi	A0A3M6QXF4	Corticibacter populi.	270	1550736
MetQ/NlpA family ABC transporter substrate-binding protein	Bacteria	Proteobacteria	Betaproteobacteria	Burkholderiales	Comamonadaceae	Corticibacter	Corticibacter populi	A0A3M6QXF3	Corticibacter populi.	271	1550736
MetQ/NlpA family ABC transporter substrate-binding protein	Bacteria	Proteobacteria	Betaproteobacteria	Burkholderiales	Comamonadaceae	Corticibacter	Corticibacter populi	A0A3M6QXE4	Corticibacter populi.	270	1550736
Metal ABC transporter substrate-binding protein	Bacteria	Proteobacteria	Betaproteobacteria	Burkholderiales	Comamonadaceae	Corticibacter	Corticibacter populi	A0A3M6QVE0	Corticibacter populi.	304	1550736
Lipoprotein	Bacteria	Proteobacteria	Betaproteobacteria	Burkholderiales	Comamonadaceae	Corticibacter	Corticibacter populi	A0A3M6QSP8	Corticibacter populi.	271	1550736
Iron ABC transporter substrate-binding protein	Bacteria	Proteobacteria	Betaproteobacteria	Burkholderiales	Comamonadaceae	Corticibacter	Corticibacter populi	A0A3M6QPV0	Corticibacter populi.	272	1550736
ABC transporter substrate-binding protein	Bacteria	Proteobacteria	Betaproteobacteria	Burkholderiales	Comamonadaceae	Corticibacter	Corticibacter populi	A0A3M6QNH0	Corticibacter populi.	261	1550736
Iron ABC transporter substrate-binding protein	Bacteria	Proteobacteria	Betaproteobacteria	Burkholderiales	Comamonadaceae	unclassified Comamonadaceae	Comamonadaceae bacterium NML161473	A0A3M6QJJ4	Comamonadaceae bacterium NML161473.	276	2478744
ABC transporter substrate-binding protein	Bacteria	Proteobacteria	Betaproteobacteria	Burkholderiales	Comamonadaceae	unclassified Comamonadaceae	Comamonadaceae bacterium NML161473	A0A3M6QCY6	Comamonadaceae bacterium NML161473.	262	2478744
ABC transporter substrate-binding protein	Bacteria	Proteobacteria	Betaproteobacteria	Burkholderiales	Comamonadaceae	Acidovorax	Acidovorax sp. 1608163	A0A3G2FWC4	Acidovorax sp. 1608163.	262	2478662
Lipoprotein	Bacteria	Proteobacteria	Betaproteobacteria	Burkholderiales	Comamonadaceae	unclassified Comamonadaceae	Comamonadaceae bacterium	A0A3C0K7U6	Comamonadaceae bacterium.	270	1871071
Lipoprotein	Bacteria	Proteobacteria	Betaproteobacteria	Burkholderiales	Comamonadaceae	Comamonas	Comamonas testosteroni	A0A373FP43	Comamonas testosteroni	265	285
ABC transporter substrate-binding protein	Bacteria	Proteobacteria	Betaproteobacteria	Burkholderiales	Comamonadaceae	Comamonas	Comamonas testosteroni	A0A373F8K3	Comamonas testosteroni	260	285
D-methionine transport system substrate-binding protein	Bacteria	Proteobacteria	Betaproteobacteria	Burkholderiales	Comamonadaceae	Pseudorhodoferax	Pseudorhodoferax soli	A0A368Y370	Pseudorhodoferax soli.	293	545864
D-methionine transport system substrate-binding protein	Bacteria	Proteobacteria	Betaproteobacteria	Burkholderiales	Comamonadaceae	Pseudorhodoferax	Pseudorhodoferax soli	A0A368XWC2	Pseudorhodoferax soli.	275	545864
Lipoprotein	Bacteria	Proteobacteria	Betaproteobacteria	Burkholderiales	Comamonadaceae	Comamonas	Comamonas sp. JNW	A0A363RTK8	Comamonas sp. JNW.	265	2170731
Metal ABC transporter substrate-binding protein	Bacteria	Proteobacteria	Betaproteobacteria	Burkholderiales	Comamonadaceae	Comamonas	Comamonas sp. JNW	A0A363RNH7	Comamonas sp. JNW.	272	2170731
Lipoprotein	Bacteria	Proteobacteria	Betaproteobacteria	Burkholderiales	Comamonadaceae	Comamonas	Comamonas sp. JNW	A0A363RMH6	Comamonas sp. JNW.	287	2170731
Metal ABC transporter substrate-binding protein	Bacteria	Proteobacteria	Betaproteobacteria	Burkholderiales	Comamonadaceae	Comamonas	Comamonas sp. JNW	A0A363RMF1	Comamonas sp. JNW.	268	2170731
Metal ABC transporter substrate-binding protein	Bacteria	Proteobacteria	Betaproteobacteria	Burkholderiales	Comamonadaceae	Comamonas	Comamonas sp. JNW	A0A363RMC4	Comamonas sp. JNW.	270	2170731
Lipoprotein	Bacteria	Proteobacteria	Betaproteobacteria	Burkholderiales	Comamonadaceae	Comamonas	Comamonas sp. JNW	A0A363RIB9	Comamonas sp. JNW.	278	2170731
Metal ABC transporter substrate-binding protein	Bacteria	Proteobacteria	Betaproteobacteria	Burkholderiales	Comamonadaceae	Comamonas	Comamonas sp. JNW	A0A363RCT9	Comamonas sp. JNW.	264	2170731
D-methionine transport system substrate-binding protein	Bacteria	Proteobacteria	Betaproteobacteria	Burkholderiales	Comamonadaceae	Melaminivora	Melaminivora alkalimesophila	A0A317RCR1	Melaminivora alkalimesophila.	261	1165852
Lipoprotein	Bacteria	Proteobacteria	Betaproteobacteria	Burkholderiales	Comamonadaceae	Variovorax	Variovorax paradoxus	A0A2W5QLB8	Variovorax paradoxus.	272	34073
Lipoprotein	Bacteria	Proteobacteria	Betaproteobacteria	Burkholderiales	Comamonadaceae	Variovorax	Variovorax paradoxus	A0A2W5PJW6	Variovorax paradoxus.	270	34073
Lipoprotein	Bacteria	Proteobacteria	Betaproteobacteria	Burkholderiales	Comamonadaceae	Simplicispira	Simplicispira sp. 125	A0A2U1C513	Simplicispira sp. 125.	265	2135643
Lipoprotein	Bacteria	Proteobacteria	Betaproteobacteria	Burkholderiales	Comamonadaceae	Variovorax	Variovorax sp. GV014	A0A2U0Z5I7	Variovorax sp. GV014.	273	2135502
Lipoprotein	Bacteria	Proteobacteria	Betaproteobacteria	Burkholderiales	Comamonadaceae	Variovorax	Variovorax sp. GV014	A0A2U0YB71	Variovorax sp. GV014.	272	2135502
Lipoprotein	Bacteria	Proteobacteria	Betaproteobacteria	Burkholderiales	Comamonadaceae	Variovorax	Variovorax sp. GV014	A0A2U0YA76	Variovorax sp. GV014.	267	2135502
Metal ABC transporter substrate-binding protein	Bacteria	Proteobacteria	Betaproteobacteria	Burkholderiales	Comamonadaceae	Malikia	Malikia granosa	A0A2S9K6I2	Malikia granosa.	269	263067
Lipoprotein	Bacteria	Proteobacteria	Betaproteobacteria	Burkholderiales	Comamonadaceae	Ottowia	Ottowia oryzae	A0A2S0MDS1	Ottowia oryzae.	267	2109914
Lipoprotein	Bacteria	Proteobacteria	Betaproteobacteria	Burkholderiales	Comamonadaceae	Ottowia	Ottowia oryzae	A0A2S0MDI8	Ottowia oryzae.	269	2109914
Methionine-binding protein	Bacteria	Proteobacteria	Betaproteobacteria	Burkholderiales	Comamonadaceae	Variovorax	Variovorax sp. PMC12	A0A2P1VGD5	Variovorax sp. PMC12.	277	2126319
Methionine-binding protein	Bacteria	Proteobacteria	Betaproteobacteria	Burkholderiales	Comamonadaceae	Variovorax	Variovorax sp. RO1	A0A2N4SRQ1	Variovorax sp. RO1.	277	2066034
Lipoprotein	Bacteria	Proteobacteria	Betaproteobacteria	Burkholderiales	Comamonadaceae	Comamonas	Comamonas sp. 26	A0A2G6ZR71	Comamonas sp. 26.	282	2035201
D-methionine transport system substrate-binding protein	Bacteria	Proteobacteria	Betaproteobacteria	Burkholderiales	Comamonadaceae	Comamonas	Comamonas sp. 26	A0A2G6ZN89	Comamonas sp. 26.	261	2035201
D-methionine transport system substrate-binding protein	Bacteria	Proteobacteria	Betaproteobacteria	Burkholderiales	Comamonadaceae	Acidovorax	Acidovorax sp. 62	A0A2G6YCS8	Acidovorax sp. 62.	278	2035203
D-methionine transport system substrate-binding protein	Bacteria	Proteobacteria	Betaproteobacteria	Burkholderiales	Comamonadaceae	Acidovorax	Acidovorax sp. 62	A0A2G6YCQ9	Acidovorax sp. 62.	270	2035203
Lipoprotein	Bacteria	Proteobacteria	Betaproteobacteria	Burkholderiales	Comamonadaceae	Variovorax	Variovorax sp.	A0A2E9BQR7	Variovorax sp.	273	1871043
Lipoprotein	Bacteria	Proteobacteria	Betaproteobacteria	Burkholderiales	Comamonadaceae	Variovorax	Variovorax sp.	A0A2E9BKI9	Variovorax sp.	272	1871043
Metal ABC transporter substrate-binding protein	Bacteria	Proteobacteria	Betaproteobacteria	Burkholderiales	Comamonadaceae	Curvibacter	Curvibacter sp. PD_MW3	A0A2D0IIF4	Curvibacter sp. PD_MW3.	289	2027918
Metal ABC transporter substrate-binding protein	Bacteria	Proteobacteria	Betaproteobacteria	Burkholderiales	Comamonadaceae	Curvibacter	Curvibacter sp. PD_MW3	A0A2D0ICM3	Curvibacter sp. PD_MW3.	264	2027918
Lipoprotein	Bacteria	Proteobacteria	Betaproteobacteria	Burkholderiales	Comamonadaceae	Comamonas	Comamonas terrigena	A0A2A7UXS5	Comamonas terrigena.	275	32013
Lipoprotein	Bacteria	Proteobacteria	Betaproteobacteria	Burkholderiales	Comamonadaceae	Comamonas	Comamonas terrigena	A0A2A7UX95	Comamonas terrigena.	276	32013
Lipoprotein	Bacteria	Proteobacteria	Betaproteobacteria	Burkholderiales	Comamonadaceae	Comamonas	Comamonas terrigena	A0A2A7UUT8	Comamonas terrigena.	275	32013
Lipoprotein	Bacteria	Proteobacteria	Betaproteobacteria	Burkholderiales	Comamonadaceae	Comamonas	Comamonas terrigena	A0A2A7UUT2	Comamonas terrigena.	267	32013
Lipoprotein	Bacteria	Proteobacteria	Betaproteobacteria	Burkholderiales	Comamonadaceae	Variovorax	Variovorax sp. JS1663	A0A244EJ07	Variovorax sp. JS1663.	270	1851577
Lipoprotein	Bacteria	Proteobacteria	Betaproteobacteria	Burkholderiales	Comamonadaceae	Variovorax	Variovorax sp. JS1663	A0A244EHV2	Variovorax sp. JS1663.	272	1851577
Lipoprotein	Bacteria	Proteobacteria	Betaproteobacteria	Burkholderiales	Comamonadaceae	Comamonas	Comamonas serinivorans	A0A1Y0ERE8	Comamonas serinivorans.	268	1082851
Lipoprotein	Bacteria	Proteobacteria	Betaproteobacteria	Burkholderiales	Comamonadaceae	Comamonas	Comamonas kerstersii	A0A1V0BAM1	Comamonas kerstersii.	278	225992
Lipoprotein	Bacteria	Proteobacteria	Betaproteobacteria	Burkholderiales	Comamonadaceae	Rhodoferax	Rhodoferax fermentans	A0A1T1ASU6	Rhodoferax fermentans.	265	28066
Metal ABC transporter substrate-binding protein	Bacteria	Proteobacteria	Betaproteobacteria	Burkholderiales	Comamonadaceae	Rhodoferax	Rhodoferax saidenbachensis	A0A1P8K5K0	Rhodoferax saidenbachensis.	264	1484693
Lipoprotein	Bacteria	Proteobacteria	Betaproteobacteria	Burkholderiales	Comamonadaceae	Rhodoferax	Rhodoferax koreense	A0A1P8JWH8	Rhodoferax koreense.	265	1842727
D-methionine transport system substrate-binding protein	Bacteria	Proteobacteria	Betaproteobacteria	Burkholderiales	Comamonadaceae	Pseudacidovorax	Pseudacidovorax sp. RU35E	A0A1N6TBP9	Pseudacidovorax sp. RU35E.	271	1907403
Lipoprotein	Bacteria	Proteobacteria	Betaproteobacteria	Burkholderiales	Comamonadaceae	Pseudacidovorax	Pseudacidovorax sp. RU35E	A0A1N6TBA6	Pseudacidovorax sp. RU35E.	271	1907403
D-methionine transport system substrate-binding protein	Bacteria	Proteobacteria	Betaproteobacteria	Burkholderiales	Comamonadaceae	Lampropedia	Lampropedia hyalina DSM 16112	A0A1M5F815	Lampropedia hyalina DSM 16112.	271	1122156
D-methionine transport system substrate-binding protein	Bacteria	Proteobacteria	Betaproteobacteria	Burkholderiales	Comamonadaceae	Lampropedia	Lampropedia hyalina DSM 16112	A0A1M5F7Z2	Lampropedia hyalina DSM 16112.	271	1122156
Lipoprotein	Bacteria	Proteobacteria	Betaproteobacteria	Burkholderiales	Comamonadaceae	Lampropedia	Lampropedia hyalina DSM 16112	A0A1M5AK54	Lampropedia hyalina DSM 16112.	275	1122156
D-methionine transport system substrate-binding protein	Bacteria	Proteobacteria	Betaproteobacteria	Burkholderiales	Comamonadaceae	Lampropedia	Lampropedia hyalina DSM 16112	A0A1M4YJB8	Lampropedia hyalina DSM 16112.	281	1122156
D-methionine transport system substrate-binding protein	Bacteria	Proteobacteria	Betaproteobacteria	Burkholderiales	Comamonadaceae	Lampropedia	Lampropedia hyalina DSM 16112	A0A1M4VCL9	Lampropedia hyalina DSM 16112.	261	1122156
D-methionine transport system substrate-binding protein	Bacteria	Proteobacteria	Betaproteobacteria	Burkholderiales	Comamonadaceae	Lampropedia	Lampropedia hyalina DSM 16112	A0A1M4V624	Lampropedia hyalina DSM 16112.	269	1122156
Lipoprotein	Bacteria	Proteobacteria	Betaproteobacteria	Burkholderiales	Comamonadaceae	Lampropedia	Lampropedia hyalina DSM 16112	A0A1M4TB78	Lampropedia hyalina DSM 16112.	268	1122156
D-methionine transport system substrate-binding protein	Bacteria	Proteobacteria	Betaproteobacteria	Burkholderiales	Comamonadaceae	Acidovorax	Acidovorax caeni	A0A1I7K3P5	Acidovorax caeni.	268	343013
D-methionine transport system substrate-binding protein	Bacteria	Proteobacteria	Betaproteobacteria	Burkholderiales	Comamonadaceae	Acidovorax	Acidovorax caeni	A0A1I7K3K8	Acidovorax caeni.	277	343013
Lipoprotein	Bacteria	Proteobacteria	Betaproteobacteria	Burkholderiales	Comamonadaceae	Acidovorax	Acidovorax caeni	A0A1I7IYI9	Acidovorax caeni.	274	343013
D-methionine transport system substrate-binding protein	Bacteria	Proteobacteria	Betaproteobacteria	Burkholderiales	Comamonadaceae	Acidovorax	Acidovorax caeni	A0A1I7H2V8	Acidovorax caeni.	264	343013
Lipoprotein	Bacteria	Proteobacteria	Betaproteobacteria	Burkholderiales	Comamonadaceae	Variovorax	Variovorax sp. 770b2	A0A1I5XT30	Variovorax sp. 770b2.	290	1566271
Lipoprotein	Bacteria	Proteobacteria	Betaproteobacteria	Burkholderiales	Comamonadaceae	Variovorax	Variovorax sp. OV329	A0A1I4WFP5	Variovorax sp. OV329.	266	1882825
D-methionine transport system substrate-binding protein	Bacteria	Proteobacteria	Betaproteobacteria	Burkholderiales	Comamonadaceae	Acidovorax	Acidovorax wautersii	A0A1I2FFX8	Acidovorax wautersii.	276	1177982
D-methionine transport system substrate-binding protein	Bacteria	Proteobacteria	Betaproteobacteria	Burkholderiales	Comamonadaceae	Acidovorax	Acidovorax wautersii	A0A1I2FF17	Acidovorax wautersii.	287	1177982
D-methionine transport system substrate-binding protein	Bacteria	Proteobacteria	Betaproteobacteria	Burkholderiales	Comamonadaceae	Acidovorax	Acidovorax wautersii	A0A1I2FDN3	Acidovorax wautersii.	297	1177982
D-methionine transport system substrate-binding protein	Bacteria	Proteobacteria	Betaproteobacteria	Burkholderiales	Comamonadaceae	Acidovorax	Acidovorax konjaci	A0A1I1ZIQ3	Acidovorax konjaci.	277	32040
D-methionine transport system substrate-binding protein	Bacteria	Proteobacteria	Betaproteobacteria	Burkholderiales	Comamonadaceae	Acidovorax	Acidovorax konjaci	A0A1I1ZIE0	Acidovorax konjaci.	285	32040
Lipoprotein	Bacteria	Proteobacteria	Betaproteobacteria	Burkholderiales	Comamonadaceae	Acidovorax	Acidovorax konjaci	A0A1I1T0Y3	Acidovorax konjaci.	265	32040
D-methionine transport system substrate-binding protein	Bacteria	Proteobacteria	Betaproteobacteria	Burkholderiales	Comamonadaceae	Polaromonas	Polaromonas sp. OV174	A0A1I1L7A1	Polaromonas sp. OV174.	263	1855300
Lipoprotein	Bacteria	Proteobacteria	Betaproteobacteria	Burkholderiales	Comamonadaceae	Delftia	Delftia tsuruhatensis	A0A1I1BUH6	Delftia tsuruhatensis.	291	180282
D-methionine transport system substrate-binding protein	Bacteria	Proteobacteria	Betaproteobacteria	Burkholderiales	Comamonadaceae	Giesbergeria	Giesbergeria anulus	A0A1H9LM65	Giesbergeria anulus.	269	180197
D-methionine transport system substrate-binding protein	Bacteria	Proteobacteria	Betaproteobacteria	Burkholderiales	Comamonadaceae	Giesbergeria	Giesbergeria anulus	A0A1H9F0Q6	Giesbergeria anulus.	261	180197
D-methionine transport system substrate-binding protein	Bacteria	Proteobacteria	Betaproteobacteria	Burkholderiales	Comamonadaceae	Brachymonas	Brachymonas denitrificans DSM 15123	A0A1H8IQ44	Brachymonas denitrificans DSM 15123.	272	1121117
Lipoprotein	Bacteria	Proteobacteria	Betaproteobacteria	Burkholderiales	Comamonadaceae	Variovorax	Variovorax sp. YR216	A0A1H3XNM2	Variovorax sp. YR216.	268	1882828
D-methionine transport system substrate-binding protein	Bacteria	Proteobacteria	Betaproteobacteria	Burkholderiales	Comamonadaceae	Rhodoferax	Albidiferax sp. OV413	A0A1H0SK48	Albidiferax sp. OV413.	264	1855285
Lipoprotein	Bacteria	Proteobacteria	Betaproteobacteria	Burkholderiales	Comamonadaceae	Acidovorax	Acidovorax cattleyae	A0A1H0RYE5	Acidovorax cattleyae.	283	80868
Lipoprotein	Bacteria	Proteobacteria	Betaproteobacteria	Burkholderiales	Comamonadaceae	Rhodoferax	Albidiferax sp. OV413	A0A1H0H427	Albidiferax sp. OV413.	276	1855285
D-methionine transport system substrate-binding protein	Bacteria	Proteobacteria	Betaproteobacteria	Burkholderiales	Comamonadaceae	Acidovorax	Acidovorax valerianellae	A0A1G6S017	Acidovorax valerianellae.	282	187868
D-methionine transport system substrate-binding protein	Bacteria	Proteobacteria	Betaproteobacteria	Burkholderiales	Comamonadaceae	Acidovorax	Acidovorax valerianellae	A0A1G6RZT1	Acidovorax valerianellae.	277	187868
D-methionine transport system substrate-binding protein	Bacteria	Proteobacteria	Betaproteobacteria	Burkholderiales	Comamonadaceae	Acidovorax	Acidovorax valerianellae	A0A1G6RY55	Acidovorax valerianellae.	271	187868
Lipoprotein	Bacteria	Proteobacteria	Betaproteobacteria	Burkholderiales	Comamonadaceae	Variovorax	Variovorax boronicumulans	A0A1E7U2U4	Variovorax boronicumulans.	274	436515
Metal ABC transporter substrate-binding protein	Bacteria	Proteobacteria	Betaproteobacteria	Burkholderiales	Comamonadaceae	unclassified Comamonadaceae	Comamonadaceae bacterium SCN 68-20	A0A1E4LYP5	Comamonadaceae bacterium SCN 68-20.	275	1660161
Lipoprotein	Bacteria	Proteobacteria	Betaproteobacteria	Burkholderiales	Comamonadaceae	Variovorax	Variovorax sp. SCN 67-85	A0A1E4J906	Variovorax sp. SCN 67-85.	270	1660152
Methionine-binding protein	Bacteria	Proteobacteria	Betaproteobacteria	Burkholderiales	Comamonadaceae	Variovorax	Variovorax sp. SCN 67-85	A0A1E4J6D4	Variovorax sp. SCN 67-85.	277	1660152
Lipoprotein	Bacteria	Proteobacteria	Betaproteobacteria	Burkholderiales	Comamonadaceae	Comamonas	Comamonas sp. SCN 67-35	A0A1D2U6T5	Comamonas sp. SCN 67-35.	266	1660096
Methionine ABC transporter substrate-binding protein	Bacteria	Proteobacteria	Betaproteobacteria	Burkholderiales	Comamonadaceae	Comamonas	Comamonas sp. SCN 67-35	A0A1D2U5V9	Comamonas sp. SCN 67-35.	261	1660096
Dioxygenase	Bacteria	Proteobacteria	Betaproteobacteria	Burkholderiales	Comamonadaceae	Delftia	Delftia sp. JD2	A0A1C7LG98	Delftia sp. JD2.	268	469553
Lipoprotein	Bacteria	Proteobacteria	Betaproteobacteria	Burkholderiales	Comamonadaceae	Variovorax	Variovorax sp. HW608	A0A1C6QME0	Variovorax sp. HW608.	268	1034889
Lipoprotein	Bacteria	Proteobacteria	Betaproteobacteria	Burkholderiales	Comamonadaceae	Comamonas	Comamonas aquatica	A0A1B2D305	Comamonas aquatica.	281	225991
Lipoprotein	Bacteria	Proteobacteria	Betaproteobacteria	Burkholderiales	Comamonadaceae	Pseudacidovorax	Pseudacidovorax intermedius	A0A147GPM9	Pseudacidovorax intermedius.	271	433924
Methionine ABC transporter substrate-binding protein	Bacteria	Proteobacteria	Betaproteobacteria	Burkholderiales	Comamonadaceae	Comamonas	Comamonas kerstersii	A0A0W7Z6M1	Comamonas kerstersii.	261	225992
Metal ABC transporter substrate-binding protein	Bacteria	Proteobacteria	Betaproteobacteria	Burkholderiales	Comamonadaceae	Comamonas	Comamonas kerstersii	A0A0W7Z1G1	Comamonas kerstersii.	263	225992
Iron ABC transporter substrate-binding protein	Bacteria	Proteobacteria	Betaproteobacteria	Burkholderiales	Comamonadaceae	Lampropedia	Lampropedia cohaerens	A0A0U1Q3I6	Lampropedia cohaerens.	280	1610491	y
Lipoprotein	Bacteria	Proteobacteria	Betaproteobacteria	Burkholderiales	Comamonadaceae	Lampropedia	Lampropedia cohaerens	A0A0U1Q3B3	Lampropedia cohaerens.	270	1610491
Methionine ABC transporter substrate-binding protein	Bacteria	Proteobacteria	Betaproteobacteria	Burkholderiales	Comamonadaceae	Lampropedia	Lampropedia cohaerens	A0A0U1PZ53	Lampropedia cohaerens.	261	1610491
Lipoprotein	Bacteria	Proteobacteria	Betaproteobacteria	Burkholderiales	Comamonadaceae	Pseudorhodoferax	Pseudorhodoferax sp. Leaf274	A0A0S9NX96	Pseudorhodoferax sp. Leaf274.	283	1736318
Lipoprotein	Bacteria	Proteobacteria	Betaproteobacteria	Burkholderiales	Comamonadaceae	Pseudorhodoferax	Pseudorhodoferax sp. Leaf274	A0A0S9NX59	Pseudorhodoferax sp. Leaf274.	278	1736318
Lipoprotein	Bacteria	Proteobacteria	Betaproteobacteria	Burkholderiales	Comamonadaceae	Pseudorhodoferax	Pseudorhodoferax sp. Leaf274	A0A0S9NX27	Pseudorhodoferax sp. Leaf274.	272	1736318
Methionine-binding protein	Bacteria	Proteobacteria	Betaproteobacteria	Burkholderiales	Comamonadaceae	Pseudorhodoferax	Pseudorhodoferax sp. Leaf274	A0A0S9NX00	Pseudorhodoferax sp. Leaf274.	274	1736318
Metal ABC transporter substrate-binding protein	Bacteria	Proteobacteria	Betaproteobacteria	Burkholderiales	Comamonadaceae	Pseudorhodoferax	Pseudorhodoferax sp. Leaf274	A0A0S9MSG2	Pseudorhodoferax sp. Leaf274.	261	1736318
Lipoprotein	Bacteria	Proteobacteria	Betaproteobacteria	Burkholderiales	Comamonadaceae	Pseudorhodoferax	Pseudorhodoferax sp. Leaf265	A0A0S9M233	Pseudorhodoferax sp. Leaf265.	271	1736315
Lipoprotein	Bacteria	Proteobacteria	Betaproteobacteria	Burkholderiales	Comamonadaceae	Acidovorax	Acidovorax sp. Root217	A0A0Q8SIA6	Acidovorax sp. Root217.	265	1736492
Lipoprotein	Bacteria	Proteobacteria	Betaproteobacteria	Burkholderiales	Comamonadaceae	Acidovorax	Acidovorax sp. Leaf160	A0A0Q5MFV5	Acidovorax sp. Leaf160.	265	1736280
Methionine ABC transporter substrate-binding protein	Bacteria	Proteobacteria	Betaproteobacteria	Burkholderiales	Comamonadaceae	Acidovorax	Acidovorax sp. Leaf160	A0A0Q5LW28	Acidovorax sp. Leaf160.	263	1736280
Metal ABC transporter substrate-binding protein	Bacteria	Proteobacteria	Betaproteobacteria	Burkholderiales	Comamonadaceae	Acidovorax	Acidovorax sp. Leaf160	A0A0Q5LG87	Acidovorax sp. Leaf160.	272	1736280
Uncharacterized protein	Bacteria	Proteobacteria	Betaproteobacteria	Burkholderiales	Comamonadaceae	Acidovorax	Acidovorax sp. Leaf160	A0A0Q5LF11	Acidovorax sp. Leaf160.	286	1736280
Metal ABC transporter substrate-binding protein	Bacteria	Proteobacteria	Betaproteobacteria	Burkholderiales	Comamonadaceae	Acidovorax	Acidovorax sp. Leaf160	A0A0Q5L6B1	Acidovorax sp. Leaf160.	275	1736280
Metal ABC transporter substrate-binding protein	Bacteria	Proteobacteria	Betaproteobacteria	Burkholderiales	Comamonadaceae	Pseudorhodoferax	Pseudorhodoferax sp. Leaf267	A0A0Q4XRH3	Pseudorhodoferax sp. Leaf267.	262	1736316
Lipoprotein	Bacteria	Proteobacteria	Betaproteobacteria	Burkholderiales	Comamonadaceae	Acidovorax	Acidovorax sp. Leaf78	A0A0Q4S3H8	Acidovorax sp. Leaf78.	286	1736237
Lipoprotein	Bacteria	Proteobacteria	Betaproteobacteria	Burkholderiales	Comamonadaceae	Acidovorax	Acidovorax sp. Leaf78	A0A0Q4RPE7	Acidovorax sp. Leaf78.	275	1736237
Lipoprotein	Bacteria	Proteobacteria	Betaproteobacteria	Burkholderiales	Comamonadaceae	Acidovorax	Acidovorax sp. SD340	A0A0Q0TDT6	Acidovorax sp. SD340.	278	1690268
Lipoprotein	Bacteria	Proteobacteria	Betaproteobacteria	Burkholderiales	Comamonadaceae	Ottowia	Ottowia sp. oral taxon 894	A0A0K1NGJ7	Ottowia sp. oral taxon 894.	269	1658672
Lipoprotein	Bacteria	Proteobacteria	Betaproteobacteria	Burkholderiales	Comamonadaceae	Ottowia	Ottowia sp. oral taxon 894	A0A0K1NFG7	Ottowia sp. oral taxon 894.	268	1658672
Lipoprotein	Bacteria	Proteobacteria	Betaproteobacteria	Burkholderiales	Comamonadaceae	Ottowia	Ottowia sp. oral taxon 894	A0A0K1NFE4	Ottowia sp. oral taxon 894.	270	1658672
Lipoprotein	Bacteria	Proteobacteria	Betaproteobacteria	Burkholderiales	Comamonadaceae	Variovorax	Variovorax paradoxus	A0A0H2MNM8	Variovorax paradoxus.	273	34073
Lipoprotein	Bacteria	Proteobacteria	Betaproteobacteria	Burkholderiales	Comamonadaceae	Variovorax	Variovorax paradoxus	A0A0H2M7I8	Variovorax paradoxus.	273	34073
Methionine ABC transporter substrate-binding protein	Bacteria	Proteobacteria	Betaproteobacteria	Burkholderiales	Comamonadaceae	Acidovorax	Acidovorax temperans	A0A0D7K8R5	Acidovorax temperans.	262	80878
Lipoprotein	Bacteria	Proteobacteria	Betaproteobacteria	Burkholderiales	Comamonadaceae	Acidovorax	Acidovorax temperans	A0A0D7K460	Acidovorax temperans.	265	80878
Lipoprotein	Bacteria	Proteobacteria	Betaproteobacteria	Burkholderiales	Comamonadaceae	Variovorax	Variovorax paradoxus	A0A0D0MPX3	Variovorax paradoxus.	267	34073
Lipoprotein	Bacteria	Proteobacteria	Betaproteobacteria	Burkholderiales	Comamonadaceae	Variovorax	Variovorax paradoxus	A0A0D0LSS5	Variovorax paradoxus.	271	34073
Dioxygenase	Bacteria	Proteobacteria	Betaproteobacteria	Burkholderiales	Comamonadaceae	Delftia	Delftia sp. 670	A0A081J4I2	Delftia sp. 670.	262	1537702
Lipoprotein	Bacteria	Proteobacteria	Betaproteobacteria	Burkholderiales	Comamonadaceae	Comamonas	Comamonas testosteroni TK102	A0A076PS67	Comamonas testosteroni TK102.	266	1392005
Lipoprotein	Bacteria	Proteobacteria	Betaproteobacteria	Burkholderiales	Comamonadaceae	Comamonas	Comamonas testosteroni TK102	A0A076PL91	Comamonas testosteroni TK102.	266	1392005
Lipoprotein	Bacteria	Proteobacteria	Betaproteobacteria	Burkholderiales	Comamonadaceae	Delftia	Delftia tsuruhatensis	A0A072TB54	Delftia tsuruhatensis.	270	180282
Lipoprotein	Bacteria	Proteobacteria	Betaproteobacteria	Burkholderiales	Comamonadaceae	Delftia	Delftia tsuruhatensis	A0A072T9A6	Delftia tsuruhatensis.	272	180282
Lipoprotein	Bacteria	Proteobacteria	Betaproteobacteria	Burkholderiales	Comamonadaceae	Delftia	Delftia tsuruhatensis	A0A072T599	Delftia tsuruhatensis.	269	180282
Methionine ABC transporter substrate-binding protein	Bacteria	Proteobacteria	Betaproteobacteria	Burkholderiales	Comamonadaceae	Polaromonas	Polaromonas sp. CG9_12	A0A068YSK8	Polaromonas sp. CG9_12.	257	1504672
Lipoprotein	Bacteria	Proteobacteria	Betaproteobacteria	Burkholderiales	Comamonadaceae	Comamonas	Comamonas aquatica DA1877	A0A014QCH0	Comamonas aquatica DA1877.	275	1457173
Dioxygenase	Bacteria	Proteobacteria	Betaproteobacteria	Burkholderiales	Comamonadaceae	Comamonas	Comamonas aquatica DA1877	A0A014Q789	Comamonas aquatica DA1877.	262	1457173
Lipoprotein	Bacteria	Proteobacteria	Betaproteobacteria	Burkholderiales	Comamonadaceae	Comamonas	Comamonas aquatica DA1877	A0A014MQJ4	Comamonas aquatica DA1877.	274	1457173
Lipoprotein	Bacteria	Proteobacteria	Betaproteobacteria	Neisseriales	Chromobacteriaceae	Pseudogulbenkiania	Pseudogulbenkiania sp. NH8B	G2IWV1	Pseudogulbenkiania sp. (strain NH8B)	269	748280
ABC transporter substrate-binding protein	Bacteria	Proteobacteria	Betaproteobacteria	Neisseriales	Chromobacteriaceae	Chitiniphilus	Chitiniphilus eburneus	A0A4U0Q182	Chitiniphilus eburneus.	257	2571148
Lipoprotein	Bacteria	Proteobacteria	Betaproteobacteria	Neisseriales	Chromobacteriaceae	Paludibacterium	Paludibacterium purpuratum	A0A4R7BAR9	Paludibacterium purpuratum.	269	1144873
Lipoprotein	Bacteria	Proteobacteria	Betaproteobacteria	Neisseriales	Chromobacteriaceae	Aquitalea	Aquitalea magnusonii	A0A3G9GJE8	Aquitalea magnusonii.	271	332411
D-methionine transport system substrate-binding protein	Bacteria	Proteobacteria	Betaproteobacteria	Neisseriales	Chromobacteriaceae	Microvirgula	Microvirgula sp. AG722	A0A329BCU9	Microvirgula sp. AG722.	274	2183901
D-methionine transport system substrate-binding protein	Bacteria	Proteobacteria	Betaproteobacteria	Neisseriales	Chromobacteriaceae	Microvirgula	Microvirgula sp. AG722	A0A329B888	Microvirgula sp. AG722.	257	2183901
D-methionine transport system substrate-binding protein	Bacteria	Proteobacteria	Betaproteobacteria	Neisseriales	Chromobacteriaceae	Microvirgula	Microvirgula sp. AG722	A0A329B6I9	Microvirgula sp. AG722.	262	2183901
Methionine ABC transporter substrate-binding protein	Bacteria	Proteobacteria	Betaproteobacteria	Neisseriales	Chromobacteriaceae	Laribacter	Laribacter hongkongensis	A0A248LJH9	Laribacter hongkongensis.	257	168471
Lipoprotein	Bacteria	Proteobacteria	Betaproteobacteria	Neisseriales	Chromobacteriaceae	Chromobacterium	Chromobacterium violaceum	A0A202B869	Chromobacterium violaceum.	269	536
D-methionine transport system substrate-binding protein	Bacteria	Proteobacteria	Betaproteobacteria	Neisseriales	Chromobacteriaceae	Andreprevotia	Andreprevotia lacus DSM 23236	A0A1W1XGM6	Andreprevotia lacus DSM 23236.	257	1121001
Methionine ABC transporter substrate-binding protein	Bacteria	Proteobacteria	Betaproteobacteria	Neisseriales	Chromobacteriaceae	Jeongeupia	Jeongeupia sp. USM3	A0A1D9BC23	Jeongeupia sp. USM3.	257	1906741
D-methionine transport system substrate-binding protein	Bacteria	Proteobacteria	Betaproteobacteria	Neisseriales	Chromobacteriaceae	Vogesella	Vogesella sp. LIG4	A0A1C6N6D2	Vogesella sp. LIG4.	262	1192162
D-methionine transport system substrate-binding protein	Bacteria	Proteobacteria	Betaproteobacteria	Neisseriales	Chromobacteriaceae	Vogesella	Vogesella sp. LIG4	A0A1C6MWP4	Vogesella sp. LIG4.	269	1192162
Lipoprotein	Bacteria	Proteobacteria	Betaproteobacteria	Neisseriales	Chromobacteriaceae	Gulbenkiania	Gulbenkiania indica	A0A0K6H3Y2	Gulbenkiania indica.	269	375574
Methionine ABC transporter substrate-binding protein	Bacteria	Proteobacteria	Betaproteobacteria	Neisseriales	Chromobacteriaceae	Chromobacterium group	Chromobacterium sp. LK11	A0A0J6RF32	Chromobacterium sp. LK11.	264	1628212
Lipoprotein	Bacteria	Proteobacteria	Betaproteobacteria	Neisseriales	Chromobacteriaceae	Chromobacterium group	Chromobacterium sp. LK11	A0A0J6NK72	Chromobacterium sp. LK11.	269	1628212
Lipoprotein	Bacteria	Proteobacteria	Betaproteobacteria	Neisseriales	Chromobacteriaceae	Vogesella	Vogesella sp. EB	A0A0J5JA64	Vogesella sp. EB.	269	1526735
Methionine ABC transporter substrate-binding protein	Bacteria	Proteobacteria	Betaproteobacteria	Neisseriales	Chromobacteriaceae	Vogesella	Vogesella sp. EB	A0A0J5GFG7	Vogesella sp. EB.	260	1526735
Lipoprotein	Bacteria	Proteobacteria	Betaproteobacteria	Neisseriales	Chromobacteriaceae	Aquitalea	Aquitalea magnusonii	A0A0F3KAX5	Aquitalea magnusonii.	269	332411
Dioxygenase	Bacteria	Proteobacteria	Betaproteobacteria	Neisseriales	Chromobacteriaceae	Aquitalea	Aquitalea magnusonii	A0A0F3K9V9	Aquitalea magnusonii.	269	332411
Methionine ABC transporter substrate-binding protein	Bacteria	Proteobacteria	Betaproteobacteria	Neisseriales	Chromobacteriaceae	Aquitalea	Aquitalea magnusonii	A0A0F3K6W5	Aquitalea magnusonii.	259	332411
Methionine ABC transporter substrate-binding protein	Bacteria	Proteobacteria	Betaproteobacteria	Neisseriales	Chromobacteriaceae	Aquitalea	Aquitalea magnusonii	A0A0F3K6P1	Aquitalea magnusonii.	270	332411
Lipoprotein	Bacteria	Proteobacteria	Betaproteobacteria	Burkholderiales	Burkholderiaceae	Cupriavidus	Cupriavidus sp. HPC(L)	V2ICH8	Cupriavidus sp. HPC	295	1217418
Lipoprotein	Bacteria	Proteobacteria	Betaproteobacteria	Burkholderiales	Burkholderiaceae	Burkholderia	Burkholderia pseudomallei 1710b	Q3JPZ6	Burkholderia pseudomallei (strain 1710b)	266	320372
Lipoprotein	Bacteria	Proteobacteria	Betaproteobacteria	Burkholderiales	Burkholderiaceae	Burkholderia	Burkholderia lata	Q39AT6	Burkholderia lata (strain ATCC 17760 / DSM 23089 / LMG 22485 / NCIMB 9086 /R18194 / 383)	276	482957
Lipoprotein	Bacteria	Proteobacteria	Betaproteobacteria	Burkholderiales	Burkholderiaceae	Cupriavidus	Cupriavidus metallidurans CH34	Q1LGK3	Cupriavidus metallidurans (strain ATCC 43123 / DSM 2839 / NBRC 102507 /CH34)	273	266264
Putative outer membrane lipoprotein	Bacteria	Proteobacteria	Betaproteobacteria	Burkholderiales	Burkholderiaceae	Paraburkholderia	Paraburkholderia xenovorans LB400	Q13ND6	Paraburkholderia xenovorans (strain LB400)	291	266265
Lipoprotein	Bacteria	Proteobacteria	Betaproteobacteria	Burkholderiales	Burkholderiaceae	Paraburkholderia	Paraburkholderia xenovorans LB400	Q13NC6	Paraburkholderia xenovorans (strain LB400)	274	266265
Putative NLPA lipoprotein	Bacteria	Proteobacteria	Betaproteobacteria	Burkholderiales	Burkholderiaceae	Paraburkholderia	Paraburkholderia xenovorans LB400	Q13IM0	Paraburkholderia xenovorans (strain LB400)	283	266265
Lipoprotein	Bacteria	Proteobacteria	Betaproteobacteria	Burkholderiales	Burkholderiaceae	Paraburkholderia	Paraburkholderia xenovorans LB400	Q13IK7	Paraburkholderia xenovorans (strain LB400)	274	266265
Lipoprotein	Bacteria	Proteobacteria	Betaproteobacteria	Burkholderiales	Burkholderiaceae	Cupriavidus	Cupriavidus necator H16	Q0JZ10	Cupriavidus necator (strain ATCC 17699 / H16 / DSM 428 / Stanier 337)	273	381666
NLPA lipoprotein	Bacteria	Proteobacteria	Betaproteobacteria	Burkholderiales	Burkholderiaceae	Burkholderia	Burkholderia ambifaria AMMD	Q0B4U8	Burkholderia ambifaria (strain ATCC BAA-244 / AMMD)	269	339670
Lipoprotein	Bacteria	Proteobacteria	Betaproteobacteria	Burkholderiales	Burkholderiaceae	Paraburkholderia	Paraburkholderia phenoliruptrix BR3459a	K0DXU4	Paraburkholderia phenoliruptrix BR3459a.	279	1229205
Lipoprotein	Bacteria	Proteobacteria	Betaproteobacteria	Burkholderiales	Burkholderiaceae	Burkholderia	Burkholderia multivorans CF2	J4JMG2	Burkholderia multivorans CF2.	283	985078
Lipoprotein	Bacteria	Proteobacteria	Betaproteobacteria	Burkholderiales	Burkholderiaceae	Paraburkholderia	Paraburkholderia terrae BS001	I5CXQ6	Paraburkholderia terrae BS001.	272	1171375
Lipoprotein	Bacteria	Proteobacteria	Betaproteobacteria	Burkholderiales	Burkholderiaceae	Paraburkholderia	Candidatus Paraburkholderia kirkii UZHbot1	G4M5T6	Candidatus Paraburkholderia kirkii UZHbot1.	273	1055526
Lipoprotein	Bacteria	Proteobacteria	Betaproteobacteria	Burkholderiales	Burkholderiaceae	Burkholderia	Burkholderia gladioli BSR3	F2LPM9	Burkholderia gladioli (strain BSR3)	274	999541
ABC-type metal ion transport system periplasmic component	Bacteria	Proteobacteria	Betaproteobacteria	Burkholderiales	Burkholderiaceae	Burkholderia	Burkholderia gladioli BSR3	F2LM43	Burkholderia gladioli (strain BSR3)	287	999541
NLPA lipoprotein	Bacteria	Proteobacteria	Betaproteobacteria	Burkholderiales	Burkholderiaceae	Lautropia	Lautropia mirabilis ATCC 51599	E7S0I3	Lautropia mirabilis ATCC 51599.	264	887898
NLPA lipoprotein	Bacteria	Proteobacteria	Betaproteobacteria	Burkholderiales	Burkholderiaceae	Lautropia	Lautropia mirabilis ATCC 51599	E7RVT5	Lautropia mirabilis ATCC 51599.	277	887898
ABC transporter substrate-binding protein	Bacteria	Proteobacteria	Betaproteobacteria	Burkholderiales	Burkholderiaceae	Mycetohabitans	Paraburkholderia rhizoxinica HKI 454	E5ANR4	Paraburkholderia rhizoxinica (strain DSM 19002 / CIP 109453 / HKI 454)	264	882378
Lipoprotein	Bacteria	Proteobacteria	Betaproteobacteria	Burkholderiales	Burkholderiaceae	Mycetohabitans	Paraburkholderia rhizoxinica HKI 454	E5ALY7	Paraburkholderia rhizoxinica (strain DSM 19002 / CIP 109453 / HKI 454)	280	882378
Lipoprotein	Bacteria	Proteobacteria	Betaproteobacteria	Burkholderiales	Burkholderiaceae	Burkholderia	Burkholderia sp. CCGE1003	E1TDZ5	Burkholderia sp. (strain CCGE1003)	279	640512
Lipoprotein	Bacteria	Proteobacteria	Betaproteobacteria	Burkholderiales	Burkholderiaceae	Ralstonia	Ralstonia solanacearum CMR15	D8NC96	Ralstonia solanacearum CMR15.	266	859655
Lipoprotein	Bacteria	Proteobacteria	Betaproteobacteria	Burkholderiales	Burkholderiaceae	Ralstonia	Ralstonia solanacearum CMR15	D8N3L2	Ralstonia solanacearum CMR15.	268	859655
Lipoprotein	Bacteria	Proteobacteria	Betaproteobacteria	Burkholderiales	Burkholderiaceae	Paraburkholderia	Paraburkholderia sp. CCGE1002	D5WMK2	Burkholderia sp. (strain CCGE1002)	275	640511
Lipoprotein	Bacteria	Proteobacteria	Betaproteobacteria	Burkholderiales	Burkholderiaceae	Paraburkholderia	Paraburkholderia sp. CCGE1002	D5WKH9	Burkholderia sp. (strain CCGE1002)	279	640511
NLPA lipoprotein	Bacteria	Proteobacteria	Betaproteobacteria	Burkholderiales	Burkholderiaceae	Paraburkholderia	Paraburkholderia sp. CCGE1002	D5WIY9	Burkholderia sp. (strain CCGE1002)	264	640511
Lipoprotein	Bacteria	Proteobacteria	Betaproteobacteria	Burkholderiales	Burkholderiaceae	Burkholderia	Burkholderia glumae BGR1	C5ADN0	Burkholderia glumae (strain BGR1)	271	626418
D-methionine ABC transporter| periplasmic D-methionine-binding protein	Bacteria	Proteobacteria	Betaproteobacteria	Burkholderiales	Burkholderiaceae	Burkholderia	Burkholderia multivorans CGD2	B9BL08	Burkholderia multivorans CGD2.	267	513052
Lipoprotein	Bacteria	Proteobacteria	Betaproteobacteria	Burkholderiales	Burkholderiaceae	Burkholderia	Burkholderia multivorans CGD1	B9BAA9	Burkholderia multivorans CGD1.	265	513051
Putative NLPA lipoprotein	Bacteria	Proteobacteria	Betaproteobacteria	Burkholderiales	Burkholderiaceae	Cupriavidus	Cupriavidus taiwanensis LMG 19424	B3RC40	Cupriavidus taiwanensis (strain DSM 17343 / BCRC 17206 / CIP 107171 / LMG19424 / R1)	255	977880
D-methionine binding lipoprotein| ABC-type metal ion transport system	Bacteria	Proteobacteria	Betaproteobacteria	Burkholderiales	Burkholderiaceae	Cupriavidus	Cupriavidus taiwanensis LMG 19424	B3RAR7	Cupriavidus taiwanensis (strain DSM 17343 / BCRC 17206 / CIP 107171 / LMG19424 / R1)	283	977880
Lipoprotein	Bacteria	Proteobacteria	Betaproteobacteria	Burkholderiales	Burkholderiaceae	Cupriavidus	Cupriavidus taiwanensis LMG 19424	B3R385	Cupriavidus taiwanensis (strain DSM 17343 / BCRC 17206 / CIP 107171 / LMG19424 / R1)	265	977880
Lipoprotein	Bacteria	Proteobacteria	Betaproteobacteria	Burkholderiales	Burkholderiaceae	Cupriavidus	Cupriavidus taiwanensis LMG 19424	B3R2H1	Cupriavidus taiwanensis (strain DSM 17343 / BCRC 17206 / CIP 107171 / LMG19424 / R1)	269	977880
NLPA lipoprotein	Bacteria	Proteobacteria	Betaproteobacteria	Burkholderiales	Burkholderiaceae	Paraburkholderia	Paraburkholderia phytofirmans PsJN	B2T7U6	Paraburkholderia phytofirmans (strain DSM 17436 / LMG 22146 / PsJN)	264	398527
Lipoprotein	Bacteria	Proteobacteria	Betaproteobacteria	Burkholderiales	Burkholderiaceae	Paraburkholderia	Paraburkholderia phymatum STM815	B2JCB9	Paraburkholderia phymatum (strain DSM 17167 / CIP 108236 / LMG 21445 /STM815)	270	391038
NLPA lipoprotein	Bacteria	Proteobacteria	Betaproteobacteria	Burkholderiales	Burkholderiaceae	Paraburkholderia	Paraburkholderia graminis C4D1M	B1G1E5	Paraburkholderia graminis (strain ATCC 700544 / DSM 17151 / LMG 18924 /NCIMB 13744 / C4D1M)	290	396598
NLPA lipoprotein	Bacteria	Proteobacteria	Betaproteobacteria	Burkholderiales	Burkholderiaceae	Paraburkholderia	Paraburkholderia graminis C4D1M	B1FT02	Paraburkholderia graminis (strain ATCC 700544 / DSM 17151 / LMG 18924 /NCIMB 13744 / C4D1M)	274	396598
ABC transporter| methionine uptake transporter (MUT) family| periplasmic amino-acid binding protein	Bacteria	Proteobacteria	Betaproteobacteria	Burkholderiales	Burkholderiaceae	Burkholderia	Burkholderia pseudomallei 668	A3NGS9	Burkholderia pseudomallei (strain 668)	279	320373
ABC-type metal ion transport system periplasmic component	Bacteria	Proteobacteria	Betaproteobacteria	Burkholderiales	Burkholderiaceae	Burkholderia	Burkholderia dolosa AU0158	A2WHI9	Burkholderia dolosa AU0158.	274	350701	y
ABC-type metal ion transport system periplasmic component	Bacteria	Proteobacteria	Betaproteobacteria	Burkholderiales	Burkholderiaceae	Burkholderia	Burkholderia dolosa AU0158	A2WGS3	Burkholderia dolosa AU0158.	324	350701
Metal ABC transporter substrate-binding protein	Bacteria	Proteobacteria	Betaproteobacteria	Burkholderiales	Burkholderiaceae	Pandoraea	Pandoraea sp. LMG 31108	A0A5E4Z128	Pandoraea sp. LMG 31108.	276	2508295
Metal ABC transporter substrate-binding protein	Bacteria	Proteobacteria	Betaproteobacteria	Burkholderiales	Burkholderiaceae	Pandoraea	Pandoraea sp. LMG 31009	A0A5E4XE07	Pandoraea sp. LMG 31009.	280	2508288
Lipoprotein	Bacteria	Proteobacteria	Betaproteobacteria	Burkholderiales	Burkholderiaceae	Pandoraea	Pandoraea terrae	A0A5E4WHJ4	Pandoraea terrae.	269	1537710
Lipoprotein	Bacteria	Proteobacteria	Betaproteobacteria	Burkholderiales	Burkholderiaceae	Pandoraea	Pandoraea terrae	A0A5E4RA05	Pandoraea terrae.	266	1537710
Lipoprotein	Bacteria	Proteobacteria	Betaproteobacteria	Burkholderiales	Burkholderiaceae	Quisquiliibacterium	Quisquiliibacterium sp. CC-CFT501	A0A5C8NT17	Quisquiliibacterium sp. CC-CFT501.	272	2498847
ABC transporter substrate-binding protein	Bacteria	Proteobacteria	Betaproteobacteria	Burkholderiales	Burkholderiaceae	unclassified Burkholderiaceae	Burkholderiaceae bacterium	A0A5C8B7P9	Burkholderiaceae bacterium.	248	2030806
Methionine-binding protein	Bacteria	Proteobacteria	Betaproteobacteria	Burkholderiales	Burkholderiaceae	Paraburkholderia	Paraburkholderia azotifigens	A0A5C6V579	Paraburkholderia azotifigens.	281	2057004
Lipoprotein	Bacteria	Proteobacteria	Betaproteobacteria	Burkholderiales	Burkholderiaceae	Paraburkholderia	Paraburkholderia sp. DCY113	A0A5B0HD39	Paraburkholderia sp. DCY113.	268	2603818
Metal ABC transporter substrate-binding protein	Bacteria	Proteobacteria	Betaproteobacteria	Burkholderiales	Burkholderiaceae	Paraburkholderia	Paraburkholderia sp. DCY113	A0A5B0GP75	Paraburkholderia sp. DCY113.	266	2603818
Lipoprotein	Bacteria	Proteobacteria	Betaproteobacteria	Burkholderiales	Burkholderiaceae	Cupriavidus	Cupriavidus campinensis	A0A556UPQ8	Cupriavidus campinensis.	272	151783
Lipoprotein	Bacteria	Proteobacteria	Betaproteobacteria	Burkholderiales	Burkholderiaceae	Trinickia	Trinickia sp. 7GSK02	A0A4U1HH66	Trinickia sp. 7GSK02.	276	2571161
YaeC family lipoprotein	Bacteria	Proteobacteria	Betaproteobacteria	Burkholderiales	Burkholderiaceae	Paraburkholderia	Paraburkholderia rhizosphaerae	A0A4R8LWG7	Paraburkholderia rhizosphaerae.	266	480658
Lipoprotein	Bacteria	Proteobacteria	Betaproteobacteria	Burkholderiales	Burkholderiaceae	Paraburkholderia	Paraburkholderia sp. BL10I2N1	A0A4R6F2L5	Paraburkholderia sp. BL10I2N1.	270	1938796
Metal ABC transporter substrate-binding protein	Bacteria	Proteobacteria	Betaproteobacteria	Burkholderiales	Burkholderiaceae	Paraburkholderia	Candidatus Paraburkholderia sp. 4M-K11	A0A4R5LZI7	Candidatus Paraburkholderia sp. 4M-K11.	269	2528715
Lipoprotein	Bacteria	Proteobacteria	Betaproteobacteria	Burkholderiales	Burkholderiaceae	Paraburkholderia	Paraburkholderia guartelaensis	A0A4R5LGG8	Paraburkholderia sp. CNPSo 3008.	275	2546446
Methionine-binding protein	Bacteria	Proteobacteria	Betaproteobacteria	Burkholderiales	Burkholderiaceae	Paraburkholderia	Paraburkholderia guartelaensis	A0A4R5LDF4	Paraburkholderia sp. CNPSo 3008.	275	2546446
Metal ABC transporter substrate-binding protein	Bacteria	Proteobacteria	Betaproteobacteria	Burkholderiales	Burkholderiaceae	Burkholderia	Burkholderia sp. SRS-46	A0A4R4CT56	Burkholderia sp. SRS-46.	266	2094191
Lipoprotein	Bacteria	Proteobacteria	Betaproteobacteria	Burkholderiales	Burkholderiaceae	Paraburkholderia	Paraburkholderia sp. BL8N3	A0A4R1J196	Paraburkholderia sp. BL8N3.	270	1938808
Lipoprotein	Bacteria	Proteobacteria	Betaproteobacteria	Burkholderiales	Burkholderiaceae	Paraburkholderia	Paraburkholderia sp. BL8N3	A0A4R1IIT3	Paraburkholderia sp. BL8N3.	275	1938808
MetQ/NlpA family ABC transporter substrate-binding protein	Bacteria	Proteobacteria	Betaproteobacteria	Burkholderiales	Burkholderiaceae	Burkholderia	Burkholderia sp. DHOD12	A0A4P8IXC6	Burkholderia sp. DHOD12.	264	2571746
Lipoprotein	Bacteria	Proteobacteria	Betaproteobacteria	Burkholderiales	Burkholderiaceae	Burkholderia	Burkholderia sp. DHOD12	A0A4P8ISR2	Burkholderia sp. DHOD12.	275	2571746
Lipoprotein	Bacteria	Proteobacteria	Betaproteobacteria	Burkholderiales	Burkholderiaceae	Burkholderia	Burkholderia sp. DHOD12	A0A4P8IKN2	Burkholderia sp. DHOD12.	270	2571746
Lipoprotein	Bacteria	Proteobacteria	Betaproteobacteria	Burkholderiales	Burkholderiaceae	Paraburkholderia	Paraburkholderia sp. 7MH5	A0A4P7D8F8	Paraburkholderia sp. 7MH5.	276	2547399
Lipoprotein	Bacteria	Proteobacteria	Betaproteobacteria	Burkholderiales	Burkholderiaceae	Paraburkholderia	Paraburkholderia sp. 7MK8-2	A0A494XNV1	Paraburkholderia sp. 7MK8-2.	275	2419777
MetQ/NlpA family ABC transporter substrate-binding protein	Bacteria	Proteobacteria	Betaproteobacteria	Burkholderiales	Burkholderiaceae	Cupriavidus	Cupriavidus metallidurans	A0A482IHU8	Cupriavidus metallidurans.	264	119219
Lipoprotein	Bacteria	Proteobacteria	Betaproteobacteria	Burkholderiales	Burkholderiaceae	Ralstonia	Ralstonia sp. SET104	A0A401K7G0	Ralstonia sp. SET104.	268	2448774	y
ABC transporter substrate-binding protein	Bacteria	Proteobacteria	Betaproteobacteria	Burkholderiales	Burkholderiaceae	Lautropia	Lautropia dentalis	A0A3R8NAD9	Lautropia sp. KCOM 2505.	264	2490857
Metal ABC transporter substrate-binding protein	Bacteria	Proteobacteria	Betaproteobacteria	Burkholderiales	Burkholderiaceae	Burkholderia	Burkholderia sp. Bp9031	A0A3P0MDI8	Burkholderia sp. Bp9031.	275	2184566
Metal ABC transporter substrate-binding protein	Bacteria	Proteobacteria	Betaproteobacteria	Burkholderiales	Burkholderiaceae	Burkholderia	Burkholderia stagnalis	A0A3P0FZ81	Burkholderia stagnalis.	269	1503054
Lipoprotein	Bacteria	Proteobacteria	Betaproteobacteria	Burkholderiales	Burkholderiaceae	Burkholderia	Burkholderia sp. Bp8963	A0A3N8M9H8	Burkholderia sp. Bp8963.	271	2184547
Metal ABC transporter substrate-binding protein	Bacteria	Proteobacteria	Betaproteobacteria	Burkholderiales	Burkholderiaceae	Burkholderia	Burkholderia sp. Bp9142	A0A3N8AMQ2	Burkholderia sp. Bp9142.	269	2184573
Lipoprotein	Bacteria	Proteobacteria	Betaproteobacteria	Burkholderiales	Burkholderiaceae	Paraburkholderia	Paraburkholderia sp. DHOA04	A0A3N6Q3L2	Paraburkholderia sp. DHOA04.	265	2305225
Lipoprotein	Bacteria	Proteobacteria	Betaproteobacteria	Burkholderiales	Burkholderiaceae	Paraburkholderia	Paraburkholderia sp. DHOA04	A0A3N6PXD5	Paraburkholderia sp. DHOA04.	270	2305225
Lipoprotein	Bacteria	Proteobacteria	Betaproteobacteria	Burkholderiales	Burkholderiaceae	Paraburkholderia	Paraburkholderia sp. DHOM06	A0A3D8K5U1	Paraburkholderia sp. DHOM06.	269	2291023
Lipoprotein	Bacteria	Proteobacteria	Betaproteobacteria	Burkholderiales	Burkholderiaceae	Burkholderia	Burkholderia pseudomallei	A0A3B6W311	Burkholderia pseudomallei	269	28450
D-methionine-binding lipoprotein metQ	Bacteria	Proteobacteria	Betaproteobacteria	Burkholderiales	Burkholderiaceae	Burkholderia	Burkholderia oklahomensis	A0A381ILW3	Burkholderia oklahomensis.	276	342113
Lipoprotein	Bacteria	Proteobacteria	Betaproteobacteria	Burkholderiales	Burkholderiaceae	Burkholderia	Burkholderia oklahomensis	A0A381BUX9	Burkholderia oklahomensis.	272	342113
Lipoprotein	Bacteria	Proteobacteria	Betaproteobacteria	Burkholderiales	Burkholderiaceae	Pandoraea	Pandoraea pulmonicola	A0A378ZAL5	Pandoraea pulmonicola.	267	93221
Lipoprotein	Bacteria	Proteobacteria	Betaproteobacteria	Burkholderiales	Burkholderiaceae	Pandoraea	Pandoraea pulmonicola	A0A378Z6K0	Pandoraea pulmonicola.	265	93221
Putative NLPA lipoprotein	Bacteria	Proteobacteria	Betaproteobacteria	Burkholderiales	Burkholderiaceae	Cupriavidus	Cupriavidus taiwanensis	A0A375C5X9	Cupriavidus taiwanensis.	263	164546
Metal ABC transporter substrate-binding protein	Bacteria	Proteobacteria	Betaproteobacteria	Burkholderiales	Burkholderiaceae	Paraburkholderia	Paraburkholderia sp. DHOC27	A0A372KAJ2	Paraburkholderia sp. DHOC27.	294	2303330
Lipoprotein	Bacteria	Proteobacteria	Betaproteobacteria	Burkholderiales	Burkholderiaceae	Paraburkholderia	Paraburkholderia sp. DHOC27	A0A372JYJ2	Paraburkholderia sp. DHOC27.	274	2303330
Lipoprotein	Bacteria	Proteobacteria	Betaproteobacteria	Burkholderiales	Burkholderiaceae	Paraburkholderia	Paraburkholderia caffeinilytica	A0A346BHB1	Paraburkholderia caffeinilytica.	302	1761016
YaeC family lipoprotein	Bacteria	Proteobacteria	Betaproteobacteria	Burkholderiales	Burkholderiaceae	Burkholderia	Burkholderia sp. yr520	A0A329D645	Burkholderia sp. yr520.	257	1761779
YaeC family lipoprotein	Bacteria	Proteobacteria	Betaproteobacteria	Burkholderiales	Burkholderiaceae	Paraburkholderia	Paraburkholderia bryophila	A0A329CHV1	Paraburkholderia bryophila.	264	420952
Lipoprotein	Bacteria	Proteobacteria	Betaproteobacteria	Burkholderiales	Burkholderiaceae	Paraburkholderia	Paraburkholderia unamae	A0A328XF34	Paraburkholderia unamae.	271	219649
Lipoprotein	Bacteria	Proteobacteria	Betaproteobacteria	Burkholderiales	Burkholderiaceae	Paraburkholderia	Paraburkholderia unamae	A0A328X282	Paraburkholderia unamae.	275	219649
Lipoprotein	Bacteria	Proteobacteria	Betaproteobacteria	Burkholderiales	Burkholderiaceae	Cupriavidus	Cupriavidus plantarum	A0A316FBH2	Cupriavidus plantarum.	275	942865
Lipoprotein	Bacteria	Proteobacteria	Betaproteobacteria	Burkholderiales	Burkholderiaceae	Cupriavidus	Cupriavidus plantarum	A0A316EYI8	Cupriavidus plantarum.	267	942865
Lipoprotein	Bacteria	Proteobacteria	Betaproteobacteria	Burkholderiales	Burkholderiaceae	Cupriavidus	Cupriavidus plantarum	A0A316ES39	Cupriavidus plantarum.	271	942865
D-methionine transport system substrate-binding protein	Bacteria	Proteobacteria	Betaproteobacteria	Burkholderiales	Burkholderiaceae	Cupriavidus	Cupriavidus plantarum	A0A316ELL3	Cupriavidus plantarum.	276	942865
Lipoprotein	Bacteria	Proteobacteria	Betaproteobacteria	Burkholderiales	Burkholderiaceae	Mycoavidus	Mycoavidus cysteinexigens	A0A2Z6EU56	Mycoavidus cysteinexigens.	265	1553431
Metal ABC transporter substrate-binding protein	Bacteria	Proteobacteria	Betaproteobacteria	Burkholderiales	Burkholderiaceae	Burkholderia	Burkholderia pyrrocinia	A0A2Z5N4I6	Burkholderia pyrrocinia	269	60550	y
Metal ABC transporter substrate-binding protein	Bacteria	Proteobacteria	Betaproteobacteria	Burkholderiales	Burkholderiaceae	Paraburkholderia	Paraburkholderia caledonica	A0A2Z5ML13	Paraburkholderia caledonica.	270	134536
NLPA lipoprotein	Bacteria	Proteobacteria	Betaproteobacteria	Burkholderiales	Burkholderiaceae	Paucimonas	Paucimonas lemoignei	A0A2X4AP59	Paucimonas lemoignei	260	29443
NLPA lipoprotein	Bacteria	Proteobacteria	Betaproteobacteria	Burkholderiales	Burkholderiaceae	Paucimonas	Paucimonas lemoignei	A0A2X4AGY6	Paucimonas lemoignei	262	29443
NLPA lipoprotein	Bacteria	Proteobacteria	Betaproteobacteria	Burkholderiales	Burkholderiaceae	Burkholderia	Burkholderia cepacia	A0A2X1GD73	Burkholderia cepacia	278	292
Lipoprotein	Bacteria	Proteobacteria	Betaproteobacteria	Burkholderiales	Burkholderiaceae	Paraburkholderia	Paraburkholderia sp. PDC91	A0A2W7GPQ4	Paraburkholderia sp. PDC91.	272	2135498
Lipoprotein	Bacteria	Proteobacteria	Betaproteobacteria	Burkholderiales	Burkholderiaceae	Paraburkholderia	Paraburkholderia sp. PDC91	A0A2W7FXB3	Paraburkholderia sp. PDC91.	269	2135498
Lipoprotein	Bacteria	Proteobacteria	Betaproteobacteria	Burkholderiales	Burkholderiaceae	Paraburkholderia	Paraburkholderia sp. PDC91	A0A2W7FPK9	Paraburkholderia sp. PDC91.	272	2135498
Lipoprotein	Bacteria	Proteobacteria	Betaproteobacteria	Burkholderiales	Burkholderiaceae	Paraburkholderia	Paraburkholderia sp. PDC91	A0A2W7F9Y0	Paraburkholderia sp. PDC91.	265	2135498
D-methionine transport system substrate-binding protein	Bacteria	Proteobacteria	Betaproteobacteria	Burkholderiales	Burkholderiaceae	Paraburkholderia	Paraburkholderia sp. PDC91	A0A2W7F8Q1	Paraburkholderia sp. PDC91.	293	2135498
Lipoprotein	Bacteria	Proteobacteria	Betaproteobacteria	Burkholderiales	Burkholderiaceae	Paraburkholderia	Paraburkholderia silvatlantica	A0A2V4UHC2	Paraburkholderia silvatlantica.	265	321895
YaeC family lipoprotein	Bacteria	Proteobacteria	Betaproteobacteria	Burkholderiales	Burkholderiaceae	Paraburkholderia	Paraburkholderia sp. OV555	A0A2U0XX22	Paraburkholderia sp. OV555.	257	2135497
YaeC family lipoprotein	Bacteria	Proteobacteria	Betaproteobacteria	Burkholderiales	Burkholderiaceae	Paraburkholderia	Paraburkholderia sp. BL21I4N1	A0A2S8S0Q4	Paraburkholderia sp. BL21I4N1.	264	1938801
D-methionine transport system substrate-binding protein	Bacteria	Proteobacteria	Betaproteobacteria	Burkholderiales	Burkholderiaceae	Paraburkholderia	Paraburkholderia eburnea	A0A2S4LWT7	Paraburkholderia eburnea.	275	1189126
Lipoprotein	Bacteria	Proteobacteria	Betaproteobacteria	Burkholderiales	Burkholderiaceae	Paraburkholderia	Paraburkholderia eburnea	A0A2S4LVB6	Paraburkholderia eburnea.	280	1189126
Lipoprotein	Bacteria	Proteobacteria	Betaproteobacteria	Burkholderiales	Burkholderiaceae	Paraburkholderia	Paraburkholderia eburnea	A0A2S4LS18	Paraburkholderia eburnea.	265	1189126
Methionine-binding protein	Bacteria	Proteobacteria	Betaproteobacteria	Burkholderiales	Burkholderiaceae	Paraburkholderia	Paraburkholderia fungorum	A0A2N8QE28	Paraburkholderia fungorum.	284	134537
Lipoprotein	Bacteria	Proteobacteria	Betaproteobacteria	Burkholderiales	Burkholderiaceae	Trinickia	Trinickia symbiotica	A0A2N7X997	Trinickia symbiotica.	275	863227
Methionine-binding protein	Bacteria	Proteobacteria	Betaproteobacteria	Burkholderiales	Burkholderiaceae	Trinickia	Trinickia symbiotica	A0A2N7X5K7	Trinickia symbiotica.	286	863227
Lipoprotein	Bacteria	Proteobacteria	Betaproteobacteria	Burkholderiales	Burkholderiaceae	Trinickia	Trinickia symbiotica	A0A2N7X491	Trinickia symbiotica.	274	863227
Lipoprotein	Bacteria	Proteobacteria	Betaproteobacteria	Burkholderiales	Burkholderiaceae	Trinickia	Trinickia soli	A0A2N7W7Q7	Trinickia soli.	270	380675
Metal ABC transporter substrate-binding protein	Bacteria	Proteobacteria	Betaproteobacteria	Burkholderiales	Burkholderiaceae	Cupriavidus	Cupriavidus pauculus	A0A2N5C7Z3	Cupriavidus pauculus.	265	82633
Lipoprotein	Bacteria	Proteobacteria	Betaproteobacteria	Burkholderiales	Burkholderiaceae	Burkholderia	Burkholderia sp. WAC0059	A0A2J6MWU3	Burkholderia sp. WAC0059.	275	2066022
Metal ABC transporter substrate-binding protein	Bacteria	Proteobacteria	Betaproteobacteria	Burkholderiales	Burkholderiaceae	Burkholderia	Burkholderia sp. WAC0059	A0A2J6MUD2	Burkholderia sp. WAC0059.	299	2066022
Lipoprotein	Bacteria	Proteobacteria	Betaproteobacteria	Burkholderiales	Burkholderiaceae	Burkholderia	Burkholderia sp. WAC0059	A0A2J6MTT9	Burkholderia sp. WAC0059.	278	2066022
Methionine ABC transporter substrate-binding protein	Bacteria	Proteobacteria	Betaproteobacteria	Burkholderiales	Burkholderiaceae	Chitinimonas	Chitinimonas sp. BJB300	A0A2G3K7R9	Chitinimonas sp. BJB300.	259	1559339
Metal ABC transporter substrate-binding protein	Bacteria	Proteobacteria	Betaproteobacteria	Burkholderiales	Burkholderiaceae	Paraburkholderia	Paraburkholderia aromaticivorans	A0A248VRL9	Paraburkholderia aromaticivorans.	264	2026199
Lipoprotein	Bacteria	Proteobacteria	Betaproteobacteria	Burkholderiales	Burkholderiaceae	Pandoraea	Pandoraea sputorum	A0A239SPN7	Pandoraea sputorum.	276	93222
Lipoprotein	Bacteria	Proteobacteria	Betaproteobacteria	Burkholderiales	Burkholderiaceae	Pandoraea	Pandoraea sputorum	A0A239SE93	Pandoraea sputorum.	266	93222
Lipoprotein	Bacteria	Proteobacteria	Betaproteobacteria	Burkholderiales	Burkholderiaceae	Burkholderia	Burkholderia singularis	A0A238HCW2	Burkholderia singularis.	265	1503053
Methionine ABC transporter substrate-binding protein	Bacteria	Proteobacteria	Betaproteobacteria	Burkholderiales	Burkholderiaceae	Caballeronia	Caballeronia sordidicola	A0A226X5E8	Caballeronia sordidicola.	285	196367
Lipoprotein| YaeC family	Bacteria	Proteobacteria	Betaproteobacteria	Burkholderiales	Burkholderiaceae	Paraburkholderia	Paraburkholderia susongensis	A0A1X7LBL7	Paraburkholderia susongensis.	262	1515439
Lipoprotein	Bacteria	Proteobacteria	Betaproteobacteria	Burkholderiales	Burkholderiaceae	Paraburkholderia	Paraburkholderia susongensis	A0A1X7JVM5	Paraburkholderia susongensis.	270	1515439
Lipoprotein	Bacteria	Proteobacteria	Betaproteobacteria	Burkholderiales	Burkholderiaceae	Trinickia	Trinickia caryophylli	A0A1X7EQM9	Trinickia caryophylli	275	28094
Lipoprotein	Bacteria	Proteobacteria	Betaproteobacteria	Burkholderiales	Burkholderiaceae	Burkholderia	Burkholderia cenocepacia	A0A1V2XFW8	Burkholderia cenocepacia.	268	95486
Metal ABC transporter substrate-binding protein	Bacteria	Proteobacteria	Betaproteobacteria	Burkholderiales	Burkholderiaceae	Cupriavidus	Cupriavidus necator	A0A1U9UYR7	Cupriavidus necator	263	106590
Metal ABC transporter substrate-binding protein	Bacteria	Proteobacteria	Betaproteobacteria	Burkholderiales	Burkholderiaceae	Burkholderia	Burkholderia sp. SRS-W-2-2016	A0A1Q8J029	Burkholderia sp. SRS-W-2-2016.	264	1926878
Lipoprotein	Bacteria	Proteobacteria	Betaproteobacteria	Burkholderiales	Burkholderiaceae	Burkholderia	Burkholderia sp. KK1	A0A1P9Y605	Burkholderia sp. KK1.	270	1855726
Lipoprotein	Bacteria	Proteobacteria	Betaproteobacteria	Burkholderiales	Burkholderiaceae	Burkholderia	Burkholderia sp. KK1	A0A1P9Y5X5	Burkholderia sp. KK1.	275	1855726
Lipoprotein	Bacteria	Proteobacteria	Betaproteobacteria	Burkholderiales	Burkholderiaceae	Burkholderia	Burkholderia sp. KK1	A0A1P9Y5T1	Burkholderia sp. KK1.	270	1855726
Lipoprotein	Bacteria	Proteobacteria	Betaproteobacteria	Burkholderiales	Burkholderiaceae	Paraburkholderia	Paraburkholderia piptadeniae	A0A1N7SMP4	Paraburkholderia piptadeniae.	266	1701573
Lipoprotein	Bacteria	Proteobacteria	Betaproteobacteria	Burkholderiales	Burkholderiaceae	Paraburkholderia	Paraburkholderia ribeironis	A0A1N7RYI1	Paraburkholderia ribeironis.	271	1247936
Lipoprotein	Bacteria	Proteobacteria	Betaproteobacteria	Burkholderiales	Burkholderiaceae	Paraburkholderia	Paraburkholderia piptadeniae	A0A1N7RXB8	Paraburkholderia piptadeniae.	270	1701573
Lipoprotein	Bacteria	Proteobacteria	Betaproteobacteria	Burkholderiales	Burkholderiaceae	Burkholderia	Burkholderia sp. GAS332	A0A1N6LQD5	Burkholderia sp. GAS332.	278	1882750
Lipoprotein	Bacteria	Proteobacteria	Betaproteobacteria	Burkholderiales	Burkholderiaceae	Paraburkholderia	Paraburkholderia phenazinium	A0A1N6KJ95	Paraburkholderia phenazinium.	284	60549
Lipoprotein	Bacteria	Proteobacteria	Betaproteobacteria	Burkholderiales	Burkholderiaceae	Paraburkholderia	Paraburkholderia phenazinium	A0A1N6FGD5	Paraburkholderia phenazinium.	266	60549
D-methionine transport system substrate-binding protein	Bacteria	Proteobacteria	Betaproteobacteria	Burkholderiales	Burkholderiaceae	Chitinimonas	Chitinimonas taiwanensis DSM 18899	A0A1K2HH29	Chitinimonas taiwanensis DSM 18899.	259	1121279
Lipoprotein	Bacteria	Proteobacteria	Betaproteobacteria	Burkholderiales	Burkholderiaceae	Paraburkholderia	Paraburkholderia megapolitana	A0A1I3J9K5	Paraburkholderia megapolitana.	267	420953
Lipoprotein	Bacteria	Proteobacteria	Betaproteobacteria	Burkholderiales	Burkholderiaceae	Paraburkholderia	Paraburkholderia megapolitana	A0A1I3EGZ6	Paraburkholderia megapolitana.	273	420953
Lipoprotein	Bacteria	Proteobacteria	Betaproteobacteria	Burkholderiales	Burkholderiaceae	Paraburkholderia	Paraburkholderia megapolitana	A0A1I3EA92	Paraburkholderia megapolitana.	281	420953
Lipoprotein	Bacteria	Proteobacteria	Betaproteobacteria	Burkholderiales	Burkholderiaceae	Cupriavidus	Cupriavidus sp. OV038	A0A1I1SRD0	Cupriavidus sp. OV038.	265	1855313
D-methionine transport system substrate-binding protein	Bacteria	Proteobacteria	Betaproteobacteria	Burkholderiales	Burkholderiaceae	Cupriavidus	Cupriavidus sp. OV038	A0A1I1RCN8	Cupriavidus sp. OV038.	273	1855313
Lipoprotein	Bacteria	Proteobacteria	Betaproteobacteria	Burkholderiales	Burkholderiaceae	Cupriavidus	Cupriavidus sp. OV038	A0A1I1QLD6	Cupriavidus sp. OV038.	274	1855313
Lipoprotein| YaeC family	Bacteria	Proteobacteria	Betaproteobacteria	Burkholderiales	Burkholderiaceae	Cupriavidus	Cupriavidus sp. OV038	A0A1I1HNL0	Cupriavidus sp. OV038.	260	1855313
D-methionine transport system substrate-binding protein	Bacteria	Proteobacteria	Betaproteobacteria	Burkholderiales	Burkholderiaceae	Paraburkholderia	Paraburkholderia caballeronis	A0A1H7S6T1	Paraburkholderia caballeronis.	277	416943
D-methionine transport system substrate-binding protein	Bacteria	Proteobacteria	Betaproteobacteria	Burkholderiales	Burkholderiaceae	Paraburkholderia	Paraburkholderia caballeronis	A0A1H7QIJ4	Paraburkholderia caballeronis.	278	416943
Lipoprotein	Bacteria	Proteobacteria	Betaproteobacteria	Burkholderiales	Burkholderiaceae	Paraburkholderia	Paraburkholderia caballeronis	A0A1H7EZ47	Paraburkholderia caballeronis.	274	416943
Lipoprotein	Bacteria	Proteobacteria	Betaproteobacteria	Burkholderiales	Burkholderiaceae	Paraburkholderia	Paraburkholderia sartisoli	A0A1H4FFB6	Paraburkholderia sartisoli.	270	83784
Lipoprotein	Bacteria	Proteobacteria	Betaproteobacteria	Burkholderiales	Burkholderiaceae	Burkholderia	Burkholderia sp. JS23	A0A1H2PXZ1	Burkholderia sp. JS23.	267	1770053
D-methionine transport system substrate-binding protein	Bacteria	Proteobacteria	Betaproteobacteria	Burkholderiales	Burkholderiaceae	Burkholderia	Burkholderia sp. JS23	A0A1H2PV16	Burkholderia sp. JS23.	264	1770053
D-methionine transport system substrate-binding protein	Bacteria	Proteobacteria	Betaproteobacteria	Burkholderiales	Burkholderiaceae	Burkholderia	Burkholderia sp. JS23	A0A1H2PQH1	Burkholderia sp. JS23.	269	1770053
D-methionine transport system substrate-binding protein	Bacteria	Proteobacteria	Betaproteobacteria	Burkholderiales	Burkholderiaceae	Burkholderia	Burkholderia sp. JS23	A0A1H2PQ95	Burkholderia sp. JS23.	311	1770053
D-methionine transport system substrate-binding protein	Bacteria	Proteobacteria	Betaproteobacteria	Burkholderiales	Burkholderiaceae	Paraburkholderia	Paraburkholderia fungorum	A0A1H1JPX2	Paraburkholderia fungorum.	283	134537
Lipoprotein	Bacteria	Proteobacteria	Betaproteobacteria	Burkholderiales	Burkholderiaceae	Paraburkholderia	Paraburkholderia fungorum	A0A1H1JPM0	Paraburkholderia fungorum.	265	134537
Lipoprotein| YaeC family	Bacteria	Proteobacteria	Betaproteobacteria	Burkholderiales	Burkholderiaceae	Paraburkholderia	Paraburkholderia fungorum	A0A1H1IGC6	Paraburkholderia fungorum.	266	134537
Lipoprotein	Bacteria	Proteobacteria	Betaproteobacteria	Burkholderiales	Burkholderiaceae	Paraburkholderia	Paraburkholderia fungorum	A0A1H1IF94	Paraburkholderia fungorum.	279	134537
Lipoprotein	Bacteria	Proteobacteria	Betaproteobacteria	Burkholderiales	Burkholderiaceae	Ralstonia	Ralstonia sp. 25mfcol4.1	A0A1H0UP20	Ralstonia sp. 25mfcol4.1.	274	1761899
Lipoprotein| YaeC family	Bacteria	Proteobacteria	Betaproteobacteria	Burkholderiales	Burkholderiaceae	Ralstonia	Ralstonia sp. 25mfcol4.1	A0A1H0PTK8	Ralstonia sp. 25mfcol4.1.	263	1761899
Lipoprotein	Bacteria	Proteobacteria	Betaproteobacteria	Burkholderiales	Burkholderiaceae	Ralstonia	Ralstonia sp. 25mfcol4.1	A0A1H0PN47	Ralstonia sp. 25mfcol4.1.	270	1761899
Lipoprotein	Bacteria	Proteobacteria	Betaproteobacteria	Burkholderiales	Burkholderiaceae	Cupriavidus	Cupriavidus sp. YR651	A0A1G6NUV2	Cupriavidus sp. YR651.	270	1855315
Lipoprotein	Bacteria	Proteobacteria	Betaproteobacteria	Burkholderiales	Burkholderiaceae	Cupriavidus	Cupriavidus sp. YR651	A0A1G6NUN2	Cupriavidus sp. YR651.	271	1855315
Lipoprotein	Bacteria	Proteobacteria	Betaproteobacteria	Burkholderiales	Burkholderiaceae	Burkholderia	Burkholderia sp. TNe-862	A0A1G6JCD3	Burkholderia sp. TNe-862.	278	416944
Lipoprotein	Bacteria	Proteobacteria	Betaproteobacteria	Burkholderiales	Burkholderiaceae	Burkholderia	Burkholderia contaminans	A0A1E3FH60	Burkholderia contaminans.	276	488447
Lipoprotein	Bacteria	Proteobacteria	Betaproteobacteria	Burkholderiales	Burkholderiaceae	Cupriavidus	Cupriavidus sp. USMAA2-4	A0A1D9HA08	Cupriavidus sp. USMAA2-4.	271	876364
Metal ABC transporter substrate-binding protein	Bacteria	Proteobacteria	Betaproteobacteria	Burkholderiales	Burkholderiaceae	Cupriavidus	Cupriavidus sp. USMAA2-4	A0A1D9H9E1	Cupriavidus sp. USMAA2-4.	280	876364
Lipoprotein	Bacteria	Proteobacteria	Betaproteobacteria	Burkholderiales	Burkholderiaceae	Cupriavidus	Cupriavidus sp. USMAA2-4	A0A1D9H9A6	Cupriavidus sp. USMAA2-4.	270	876364
Lipoprotein	Bacteria	Proteobacteria	Betaproteobacteria	Burkholderiales	Burkholderiaceae	Cupriavidus	Cupriavidus sp. USMAA2-4	A0A1D9H983	Cupriavidus sp. USMAA2-4.	267	876364
Lipoprotein	Bacteria	Proteobacteria	Betaproteobacteria	Burkholderiales	Burkholderiaceae	Cupriavidus	Cupriavidus sp. USMAA2-4	A0A1D9H7X8	Cupriavidus sp. USMAA2-4.	273	876364
Lipoprotein	Bacteria	Proteobacteria	Betaproteobacteria	Burkholderiales	Burkholderiaceae	Cupriavidus	Cupriavidus sp. USMAA2-4	A0A1D9GVW1	Cupriavidus sp. USMAA2-4.	272	876364
Lipoprotein	Bacteria	Proteobacteria	Betaproteobacteria	Burkholderiales	Burkholderiaceae	Cupriavidus	Cupriavidus sp. USMAA2-4	A0A1D9GUR7	Cupriavidus sp. USMAA2-4.	268	876364
Metal ABC transporter substrate-binding protein	Bacteria	Proteobacteria	Betaproteobacteria	Burkholderiales	Burkholderiaceae	Burkholderia	Burkholderia cepacia	A0A1B4Q440	Burkholderia cepacia	256	292
Metal ABC transporter substrate-binding protein	Bacteria	Proteobacteria	Betaproteobacteria	Burkholderiales	Burkholderiaceae	Burkholderia	Burkholderia latens	A0A1B4NZ80	Burkholderia latens.	270	488446
Metal ABC transporter substrate-binding protein	Bacteria	Proteobacteria	Betaproteobacteria	Burkholderiales	Burkholderiaceae	Burkholderia	Burkholderia metallica	A0A1B4I1F4	Burkholderia metallica.	269	488729
Methionine ABC transporter substrate-binding protein	Bacteria	Proteobacteria	Betaproteobacteria	Burkholderiales	Burkholderiaceae	Burkholderia	Burkholderia sp. BDU6	A0A1B4FJY3	Burkholderia sp. BDU6.	245	1385591
Metal ABC transporter substrate-binding protein	Bacteria	Proteobacteria	Betaproteobacteria	Burkholderiales	Burkholderiaceae	Burkholderia	Burkholderia diffusa	A0A1B4BXC2	Burkholderia diffusa.	269	488732
Lipoprotein	Bacteria	Proteobacteria	Betaproteobacteria	Burkholderiales	Burkholderiaceae	Paraburkholderia	Paraburkholderia ginsengiterrae	A0A1A9N925	Paraburkholderia ginsengiterrae.	279	1462993
Metal ABC transporter substrate-binding protein	Bacteria	Proteobacteria	Betaproteobacteria	Burkholderiales	Burkholderiaceae	Paraburkholderia	Paraburkholderia ginsengiterrae	A0A1A9N2M3	Paraburkholderia ginsengiterrae.	266	1462993
Lipoprotein	Bacteria	Proteobacteria	Betaproteobacteria	Burkholderiales	Burkholderiaceae	Paraburkholderia	Paraburkholderia tropica	A0A1A5XKD7	Paraburkholderia tropica.	269	92647
Methionine-binding protein	Bacteria	Proteobacteria	Betaproteobacteria	Burkholderiales	Burkholderiaceae	Paraburkholderia	Paraburkholderia tropica	A0A1A5XF52	Paraburkholderia tropica.	279	92647
Metal ABC transporter substrate-binding protein	Bacteria	Proteobacteria	Betaproteobacteria	Burkholderiales	Burkholderiaceae	Paraburkholderia	Paraburkholderia tropica	A0A1A5XEM7	Paraburkholderia tropica.	274	92647
Lipoprotein	Bacteria	Proteobacteria	Betaproteobacteria	Burkholderiales	Burkholderiaceae	Paraburkholderia	Paraburkholderia tropica	A0A1A5X855	Paraburkholderia tropica.	270	92647
Lipoprotein	Bacteria	Proteobacteria	Betaproteobacteria	Burkholderiales	Burkholderiaceae	Burkholderia	Burkholderia sp. OLGA172	A0A167W2W0	Burkholderia sp. OLGA172.	274	1804984
Lipoprotein	Bacteria	Proteobacteria	Betaproteobacteria	Burkholderiales	Burkholderiaceae	Caballeronia	Caballeronia humi	A0A158IK13	Caballeronia humi.	267	326474
Lipoprotein	Bacteria	Proteobacteria	Betaproteobacteria	Burkholderiales	Burkholderiaceae	Caballeronia	Caballeronia terrestris	A0A158HSV5	Caballeronia terrestris.	265	1226301
Lipoprotein	Bacteria	Proteobacteria	Betaproteobacteria	Burkholderiales	Burkholderiaceae	Caballeronia	Caballeronia sordidicola	A0A158HE42	Caballeronia sordidicola.	268	196367
Lipoprotein YaeC	Bacteria	Proteobacteria	Betaproteobacteria	Burkholderiales	Burkholderiaceae	Caballeronia	Caballeronia sordidicola	A0A158H8A8	Caballeronia sordidicola.	273	196367
Lipoprotein	Bacteria	Proteobacteria	Betaproteobacteria	Burkholderiales	Burkholderiaceae	Caballeronia	Caballeronia cordobensis	A0A158GYG6	Caballeronia cordobensis.	279	1353886
Lipoprotein	Bacteria	Proteobacteria	Betaproteobacteria	Burkholderiales	Burkholderiaceae	Caballeronia	Caballeronia telluris	A0A158FPA4	Caballeronia telluris.	270	326475
Lipoprotein	Bacteria	Proteobacteria	Betaproteobacteria	Burkholderiales	Burkholderiaceae	Caballeronia	Caballeronia telluris	A0A158F4B2	Caballeronia telluris.	278	326475
Lipoprotein	Bacteria	Proteobacteria	Betaproteobacteria	Burkholderiales	Burkholderiaceae	Caballeronia	Caballeronia terrestris	A0A158EW34	Caballeronia terrestris.	274	1226301
Lipoprotein	Bacteria	Proteobacteria	Betaproteobacteria	Burkholderiales	Burkholderiaceae	Caballeronia	Caballeronia calidae	A0A158EGT6	Caballeronia calidae.	270	1777139
NLPA lipoprotein	Bacteria	Proteobacteria	Betaproteobacteria	Burkholderiales	Burkholderiaceae	Caballeronia	Caballeronia arationis	A0A158E117	Caballeronia arationis.	257	1777142
NLPA lipoprotein	Bacteria	Proteobacteria	Betaproteobacteria	Burkholderiales	Burkholderiaceae	Caballeronia	Caballeronia fortuita	A0A158CAF7	Caballeronia fortuita.	262	1777138
Metal ABC transporter substrate-binding protein	Bacteria	Proteobacteria	Betaproteobacteria	Burkholderiales	Burkholderiaceae	Caballeronia	Caballeronia hypogeia	A0A158BST6	Caballeronia hypogeia.	262	1777140
Lipoprotein	Bacteria	Proteobacteria	Betaproteobacteria	Burkholderiales	Burkholderiaceae	Caballeronia	Caballeronia glebae	A0A158BQP0	Caballeronia glebae.	270	1777143
Lipoprotein	Bacteria	Proteobacteria	Betaproteobacteria	Burkholderiales	Burkholderiaceae	Caballeronia	Caballeronia fortuita	A0A157ZSX3	Caballeronia fortuita.	272	1777138
Lipoprotein	Bacteria	Proteobacteria	Betaproteobacteria	Burkholderiales	Burkholderiaceae	Paraburkholderia	Paraburkholderia monticola	A0A149PSI3	Paraburkholderia monticola.	265	1399968
Metal ABC transporter substrate-binding protein	Bacteria	Proteobacteria	Betaproteobacteria	Burkholderiales	Burkholderiaceae	Burkholderia	Burkholderia cenocepacia	A0A144VN85	Burkholderia cenocepacia.	270	95486
Lipoprotein	Bacteria	Proteobacteria	Betaproteobacteria	Burkholderiales	Burkholderiaceae	Burkholderia	Burkholderia cenocepacia	A0A144SK20	Burkholderia cenocepacia.	271	95486
D-methionine-binding lipoprotein MetQ	Bacteria	Proteobacteria	Betaproteobacteria	Burkholderiales	Burkholderiaceae	Cupriavidus	Cupriavidus metallidurans	A0A132HG65	Cupriavidus metallidurans.	271	119219
Lipoprotein	Bacteria	Proteobacteria	Betaproteobacteria	Burkholderiales	Burkholderiaceae	Cupriavidus	Cupriavidus metallidurans	A0A132HE64	Cupriavidus metallidurans.	270	119219
Lipoprotein	Bacteria	Proteobacteria	Betaproteobacteria	Burkholderiales	Burkholderiaceae	Cupriavidus	Cupriavidus metallidurans	A0A132H855	Cupriavidus metallidurans.	286	119219
Metal ABC transporter substrate-binding protein	Bacteria	Proteobacteria	Betaproteobacteria	Burkholderiales	Burkholderiaceae	Burkholderia	Burkholderia pseudomultivorans	A0A132E583	Burkholderia pseudomultivorans.	271	1207504
Lipoprotein	Bacteria	Proteobacteria	Betaproteobacteria	Burkholderiales	Burkholderiaceae	Burkholderia	Burkholderia ubonensis	A0A118HP30	Burkholderia ubonensis.	275	101571
Lipoprotein	Bacteria	Proteobacteria	Betaproteobacteria	Burkholderiales	Burkholderiaceae	Burkholderia	Burkholderia singularis	A0A118DLE3	Burkholderia singularis.	276	1503053
Lipoprotein	Bacteria	Proteobacteria	Betaproteobacteria	Burkholderiales	Burkholderiaceae	Burkholderia	Burkholderia ubonensis	A0A108CBI9	Burkholderia ubonensis.	275	101571
Lipoprotein	Bacteria	Proteobacteria	Betaproteobacteria	Burkholderiales	Burkholderiaceae	Burkholderia	Burkholderia sp. TSV86	A0A103EI73	Burkholderia sp. TSV86.	266	1385594
Metal ABC transporter substrate-binding protein	Bacteria	Proteobacteria	Betaproteobacteria	Burkholderiales	Burkholderiaceae	Burkholderia	Burkholderia sp. ABCPW 11	A0A103AZ77	Burkholderia sp. ABCPW 11.	270	1637859
Metal ABC transporter substrate-binding protein	Bacteria	Proteobacteria	Betaproteobacteria	Burkholderiales	Burkholderiaceae	Burkholderia	Burkholderia sp. RF2-non_BP3	A0A102ECW3	Burkholderia sp. RF2-non_BP3.	269	1637844
DL-methionine ABC transporter substrate-bindingprotein	Bacteria	Proteobacteria	Betaproteobacteria	Burkholderiales	Burkholderiaceae	Ralstonia	Ralstonia sp. NT80	A0A100HPM9	Ralstonia sp. NT80.	269	1218247
Lipoprotein	Bacteria	Proteobacteria	Betaproteobacteria	Burkholderiales	Burkholderiaceae	Paraburkholderia	Paraburkholderia caribensis MBA4	A0A0P0RN89	Paraburkholderia caribensis MBA4.	272	1323664
Metal ABC transporter substrate-binding protein	Bacteria	Proteobacteria	Betaproteobacteria	Burkholderiales	Burkholderiaceae	Burkholderia	Burkholderia sp. ST111	A0A0N1KJV5	Burkholderia sp. ST111.	264	1682204
Lipoprotein	Bacteria	Proteobacteria	Betaproteobacteria	Burkholderiales	Burkholderiaceae	Burkholderia	Burkholderia sp. ST111	A0A0N1KJQ6	Burkholderia sp. ST111.	268	1682204
Lipoprotein	Bacteria	Proteobacteria	Betaproteobacteria	Burkholderiales	Burkholderiaceae	Burkholderia	Candidatus Burkholderia verschuerenii	A0A0L0MFU4	Candidatus Burkholderia verschuerenii.	270	242163
Methionine ABC transporter substrate-binding protein	Bacteria	Proteobacteria	Betaproteobacteria	Burkholderiales	Burkholderiaceae	Burkholderia	Candidatus Burkholderia verschuerenii	A0A0L0MAQ5	Candidatus Burkholderia verschuerenii.	264	242163
Lipoprotein	Bacteria	Proteobacteria	Betaproteobacteria	Burkholderiales	Burkholderiaceae	Ralstonia	Ralstonia sp. MD27	A0A0J9DLI6	Ralstonia sp. MD27.	273	1676617
Lipoprotein	Bacteria	Proteobacteria	Betaproteobacteria	Burkholderiales	Burkholderiaceae	Burkholderia	Burkholderia cepacia	A0A0J5ZXB8	Burkholderia cepacia	286	292
Methionine-binding protein	Bacteria	Proteobacteria	Betaproteobacteria	Burkholderiales	Burkholderiaceae	Caballeronia	Caballeronia mineralivorans PML1(12)	A0A0J1D2G5	Caballeronia mineralivorans PML1	271	908627
Lipoprotein	Bacteria	Proteobacteria	Betaproteobacteria	Burkholderiales	Burkholderiaceae	Caballeronia	Caballeronia mineralivorans PML1(12)	A0A0J1D2E6	Caballeronia mineralivorans PML1	267	908627
Dioxygenase	Bacteria	Proteobacteria	Betaproteobacteria	Burkholderiales	Burkholderiaceae	Caballeronia	Caballeronia mineralivorans PML1(12)	A0A0J1D2E5	Caballeronia mineralivorans PML1	264	908627
Lipoprotein	Bacteria	Proteobacteria	Betaproteobacteria	Burkholderiales	Burkholderiaceae	Caballeronia	Caballeronia mineralivorans PML1(12)	A0A0J1CXL7	Caballeronia mineralivorans PML1	270	908627
Lipoprotein	Bacteria	Proteobacteria	Betaproteobacteria	Burkholderiales	Burkholderiaceae	Caballeronia	Caballeronia mineralivorans PML1(12)	A0A0J1CXE8	Caballeronia mineralivorans PML1	274	908627
Lipoprotein	Bacteria	Proteobacteria	Betaproteobacteria	Burkholderiales	Burkholderiaceae	Robbsia	Robbsia andropogonis	A0A0F5JYT2	Robbsia andropogonis.	275	28092
Lipoprotein	Bacteria	Proteobacteria	Betaproteobacteria	Burkholderiales	Burkholderiaceae	Robbsia	Robbsia andropogonis	A0A0F5JX89	Robbsia andropogonis.	268	28092
Lipoprotein	Bacteria	Proteobacteria	Betaproteobacteria	Burkholderiales	Burkholderiaceae	Robbsia	Robbsia andropogonis	A0A0F5JWX1	Robbsia andropogonis.	277	28092
Lipoprotein	Bacteria	Proteobacteria	Betaproteobacteria	Burkholderiales	Burkholderiaceae	unclassified Burkholderiaceae	Burkholderiaceae bacterium 16	A0A0F0FWD4	Burkholderiaceae bacterium 16.	270	1619952
Lipoprotein	Bacteria	Proteobacteria	Betaproteobacteria	Burkholderiales	Burkholderiaceae	unclassified Burkholderiaceae	Burkholderiaceae bacterium 16	A0A0F0FQC1	Burkholderiaceae bacterium 16.	270	1619952
Metal ABC transporter substrate-binding protein	Bacteria	Proteobacteria	Betaproteobacteria	Burkholderiales	Burkholderiaceae	Pandoraea	Pandoraea oxalativorans	A0A0E3U968	Pandoraea oxalativorans.	267	573737
NLPA lipofamily protein	Bacteria	Proteobacteria	Betaproteobacteria	Burkholderiales	Burkholderiaceae	Burkholderia	Burkholderia sp. 2002721687	A0A0D5L4K9	Burkholderia sp. 2002721687.	276	1468409
KY49.ctg7180000000025_quiver| whole genome shotgun sequence	Bacteria	Proteobacteria	Betaproteobacteria	Burkholderiales	Burkholderiaceae	Burkholderia	Burkholderia sp. MSHR3999	A0A0D0H945	Burkholderia sp. MSHR3999.	268	1542965
Metal ABC transporter substrate-binding protein	Bacteria	Proteobacteria	Betaproteobacteria	Burkholderiales	Burkholderiaceae	Pandoraea	Pandoraea vervacti	A0A0C5JSP1	Pandoraea vervacti.	271	656178
Lipoprotein	Bacteria	Proteobacteria	Betaproteobacteria	Burkholderiales	Burkholderiaceae	Cupriavidus	Cupriavidus basilensis	A0A0C4YPU7	Cupriavidus basilensis.	270	68895
Lipoprotein	Bacteria	Proteobacteria	Betaproteobacteria	Burkholderiales	Burkholderiaceae	Cupriavidus	Cupriavidus basilensis	A0A0C4YJK0	Cupriavidus basilensis.	267	68895
Lipoprotein	Bacteria	Proteobacteria	Betaproteobacteria	Burkholderiales	Burkholderiaceae	Burkholderia	Burkholderia plantarii	A0A0B6S8Z7	Burkholderia plantarii.	275	41899
Putative NLPA lipoprotein	Bacteria	Proteobacteria	Betaproteobacteria	Burkholderiales	Burkholderiaceae	Burkholderia	Burkholderia plantarii	A0A0B6RVZ0	Burkholderia plantarii.	291	41899
D-methionine ABC transporter| periplasmic D-methionine-binding protein MetQ	Bacteria	Proteobacteria	Betaproteobacteria	Burkholderiales	Burkholderiaceae	Burkholderia	Burkholderia plantarii	A0A0B6RQ29	Burkholderia plantarii.	264	41899
Lipoprotein	Bacteria	Proteobacteria	Betaproteobacteria	Burkholderiales	Burkholderiaceae	Pandoraea	Pandoraea apista	A0A0B5FL12	Pandoraea apista.	267	93218
Lipoprotein	Bacteria	Proteobacteria	Betaproteobacteria	Burkholderiales	Burkholderiaceae	Pandoraea	Pandoraea apista	A0A0B5FH92	Pandoraea apista.	270	93218
Lipoprotein	Bacteria	Proteobacteria	Betaproteobacteria	Burkholderiales	Burkholderiaceae	Paraburkholderia	Paraburkholderia sacchari	A0A0A6QFS5	Paraburkholderia sacchari.	271	159450
Lipo| YaeC family protein	Bacteria	Proteobacteria	Betaproteobacteria	Burkholderiales	Burkholderiaceae	Burkholderia	Burkholderia gladioli	A0A095EWV4	Burkholderia gladioli	264	28095
NLPA lipofamily protein	Bacteria	Proteobacteria	Betaproteobacteria	Burkholderiales	Burkholderiaceae	Burkholderia	Burkholderia cepacia	A0A095DIX8	Burkholderia cepacia	270	292
Dioxygenase	Bacteria	Proteobacteria	Betaproteobacteria	Burkholderiales	Burkholderiaceae	Caballeronia	Caballeronia grimmiae	A0A069PBX1	Caballeronia grimmiae.	264	1071679
Lipoprotein	Bacteria	Proteobacteria	Betaproteobacteria	Burkholderiales	Burkholderiaceae	Caballeronia	Caballeronia grimmiae	A0A069P6Z1	Caballeronia grimmiae.	270	1071679
Lipoprotein	Bacteria	Proteobacteria	Betaproteobacteria	Burkholderiales	Burkholderiaceae	Burkholderia	Burkholderia sp. lig30	A0A063BML6	Burkholderia sp. lig30.	276	1192124
Lipoprotein	Bacteria	Proteobacteria	Betaproteobacteria	Burkholderiales	Burkholderiaceae	Burkholderia	Burkholderia sp. lig30	A0A063BDE3	Burkholderia sp. lig30.	269	1192124
Lipoprotein	Bacteria	Proteobacteria	Betaproteobacteria	Burkholderiales	Burkholderiaceae	Cupriavidus	Cupriavidus sp. SK-4	A0A022FVD3	Cupriavidus sp. SK-4.	274	574750
Methionine ABC transporter substrate-binding protein	Bacteria	Proteobacteria	Betaproteobacteria	Burkholderiales	Alcaligenaceae	Castellaniella	Castellaniella defragrans 65Phen	W8X5M6	Castellaniella defragrans 65Phen.	261	1437824
Putative lipoprotein	Bacteria	Proteobacteria	Betaproteobacteria	Burkholderiales	Alcaligenaceae	Advenella	Advenella mimigardefordensis DPN7	W0PJ53	Advenella mimigardefordensis DPN7.	262	1247726
D-methionine-binding lipoprotein MetQ	Bacteria	Proteobacteria	Betaproteobacteria	Burkholderiales	Alcaligenaceae	Advenella	Advenella mimigardefordensis DPN7	W0P5W2	Advenella mimigardefordensis DPN7.	269	1247726
Methionine ABC transporter substrate-binding protein	Bacteria	Proteobacteria	Betaproteobacteria	Burkholderiales	Alcaligenaceae	Pelistega	Pelistega indica	V8G9M9	Pelistega indica.	262	1414851
Dioxygenase	Bacteria	Proteobacteria	Betaproteobacteria	Burkholderiales	Alcaligenaceae	Alcaligenes	Alcaligenes sp. EGD-AK7	U1ZPC0	Alcaligenes sp. EGD-AK7.	280	1386079
Dioxygenase	Bacteria	Proteobacteria	Betaproteobacteria	Burkholderiales	Alcaligenaceae	Alcaligenes	Alcaligenes sp. EGD-AK7	U1YBS6	Alcaligenes sp. EGD-AK7.	274	1386079
Putative exported protein	Bacteria	Proteobacteria	Betaproteobacteria	Burkholderiales	Alcaligenaceae	Bordetella	Bordetella avium 197N	Q2L0K5	Bordetella avium (strain 197N)	274	360910
Lipoprotein	Bacteria	Proteobacteria	Betaproteobacteria	Burkholderiales	Alcaligenaceae	Bordetella	Bordetella avium 197N	Q2KVK6	Bordetella avium (strain 197N)	265	360910
Putative exported protein	Bacteria	Proteobacteria	Betaproteobacteria	Burkholderiales	Alcaligenaceae	Bordetella	Bordetella avium 197N	Q2KU84	Bordetella avium (strain 197N)	262	360910
Putative exported protein	Bacteria	Proteobacteria	Betaproteobacteria	Burkholderiales	Alcaligenaceae	Bordetella	Bordetella parapertussis Bpp5	K0MNR0	Bordetella parapertussis (strain Bpp5)	262	1208660
Putative exported protein	Bacteria	Proteobacteria	Betaproteobacteria	Burkholderiales	Alcaligenaceae	Bordetella	Bordetella parapertussis Bpp5	K0MA30	Bordetella parapertussis (strain Bpp5)	264	1208660
Lipoprotein	Bacteria	Proteobacteria	Betaproteobacteria	Burkholderiales	Alcaligenaceae	Achromobacter	Achromobacter marplatensis	J4P442	Achromobacter marplatensis.	275	470868
Uncharacterized protein	Bacteria	Proteobacteria	Betaproteobacteria	Burkholderiales	Alcaligenaceae	Advenella	Advenella kashmirensis WT001	I3UHL3	Advenella kashmirensis (strain DSM 17095 / LMG 22695 / WT001)	262	1036672
Methionine ABC transporter substrate-binding protein	Bacteria	Proteobacteria	Betaproteobacteria	Burkholderiales	Alcaligenaceae	Taylorella	Taylorella asinigenitalis MCE3	G4QBS6	Taylorella asinigenitalis (strain MCE3)	261	1008459
Methionine ABC transporter substrate-binding protein	Bacteria	Proteobacteria	Betaproteobacteria	Burkholderiales	Alcaligenaceae	Taylorella	Taylorella asinigenitalis MCE3	G4QBB8	Taylorella asinigenitalis (strain MCE3)	263	1008459
Lipoprotein	Bacteria	Proteobacteria	Betaproteobacteria	Burkholderiales	Alcaligenaceae	Achromobacter	Achromobacter insuavis AXX-A	F7T0I4	Achromobacter insuavis AXX-A.	277	1003200
Exported protein	Bacteria	Proteobacteria	Betaproteobacteria	Burkholderiales	Alcaligenaceae	Pusillimonas	Pusillimonas sp. T7-7	F4GTW3	Pusillimonas sp. (strain T7-7)	261	1007105
NLPA lipoprotein	Bacteria	Proteobacteria	Betaproteobacteria	Burkholderiales	Alcaligenaceae	Achromobacter	Achromobacter piechaudii ATCC 43553	D4XDI8	Achromobacter piechaudii ATCC 43553.	276	742159	y
Uncharacterized protein	Bacteria	Proteobacteria	Betaproteobacteria	Burkholderiales	Alcaligenaceae	Bordetella	Bordetella petrii DSM 12804	A9IM89	Bordetella petrii (strain ATCC BAA-461 / DSM 12804 / CCUG 43448)	270	340100
Lipoprotein	Bacteria	Proteobacteria	Betaproteobacteria	Burkholderiales	Alcaligenaceae	Bordetella	Bordetella petrii DSM 12804	A9I535	Bordetella petrii (strain ATCC BAA-461 / DSM 12804 / CCUG 43448)	265	340100
Putative exported protein	Bacteria	Proteobacteria	Betaproteobacteria	Burkholderiales	Alcaligenaceae	Bordetella	Bordetella petrii DSM 12804	A9I0K9	Bordetella petrii (strain ATCC BAA-461 / DSM 12804 / CCUG 43448)	261	340100
Lipoprotein	Bacteria	Proteobacteria	Betaproteobacteria	Burkholderiales	Alcaligenaceae	Achromobacter	Achromobacter xylosoxidans	A0A5K8BFK6	Alcaligenes xylosoxydans xylosoxydans	279	85698
Metal ABC transporter substrate-binding protein	Bacteria	Proteobacteria	Betaproteobacteria	Burkholderiales	Alcaligenaceae	Pigmentiphaga	Pigmentiphaga aceris	A0A5C0B855	Pigmentiphaga aceris.	271	1940612
Lipoprotein	Bacteria	Proteobacteria	Betaproteobacteria	Burkholderiales	Alcaligenaceae	Pigmentiphaga	Pigmentiphaga aceris	A0A5C0B532	Pigmentiphaga aceris.	265	1940612
Metal ABC transporter substrate-binding protein	Bacteria	Proteobacteria	Betaproteobacteria	Burkholderiales	Alcaligenaceae	Pigmentiphaga	Pigmentiphaga aceris	A0A5C0B4Z3	Pigmentiphaga aceris.	296	1940612
Lipoprotein	Bacteria	Proteobacteria	Betaproteobacteria	Burkholderiales	Alcaligenaceae	Pigmentiphaga	Pigmentiphaga aceris	A0A5C0B201	Pigmentiphaga aceris.	276	1940612
Lipoprotein	Bacteria	Proteobacteria	Betaproteobacteria	Burkholderiales	Alcaligenaceae	Pigmentiphaga	Pigmentiphaga aceris	A0A5C0B153	Pigmentiphaga aceris.	265	1940612
Lipoprotein	Bacteria	Proteobacteria	Betaproteobacteria	Burkholderiales	Alcaligenaceae	Pigmentiphaga	Pigmentiphaga aceris	A0A5C0AXD2	Pigmentiphaga aceris.	283	1940612
Lipoprotein	Bacteria	Proteobacteria	Betaproteobacteria	Burkholderiales	Alcaligenaceae	Pigmentiphaga	Pigmentiphaga aceris	A0A5C0AT29	Pigmentiphaga aceris.	269	1940612
ABC transporter substrate-binding protein	Bacteria	Proteobacteria	Betaproteobacteria	Burkholderiales	Alcaligenaceae	Pigmentiphaga	Pigmentiphaga aceris	A0A5C0AQT8	Pigmentiphaga aceris.	257	1940612
ABC transporter substrate-binding protein	Bacteria	Proteobacteria	Betaproteobacteria	Burkholderiales	Alcaligenaceae	Verticiella	Verticiella sediminum	A0A556AQ95	Verticiella sediminum.	261	1247510
MetQ/NlpA family ABC transporter substrate-binding protein	Bacteria	Proteobacteria	Betaproteobacteria	Burkholderiales	Alcaligenaceae	Verticiella	Verticiella sediminum	A0A556ANM6	Verticiella sediminum.	271	1247510
MetQ/NlpA family ABC transporter substrate-binding protein	Bacteria	Proteobacteria	Betaproteobacteria	Burkholderiales	Alcaligenaceae	Verticiella	Verticiella sediminum	A0A556ANM5	Verticiella sediminum.	280	1247510
ABC transporter substrate-binding protein	Bacteria	Proteobacteria	Betaproteobacteria	Burkholderiales	Alcaligenaceae	Castellaniella	Castellaniella sp.	A0A522TSN9	Castellaniella sp.	261	1955812
MetQ/NlpA family ABC transporter substrate-binding protein	Bacteria	Proteobacteria	Betaproteobacteria	Burkholderiales	Alcaligenaceae	unclassified Alcaligenaceae	Alcaligenaceae bacterium SJ-26	A0A516WFD9	Alcaligenaceae bacterium SJ-26.	267	2593958
D-methionine transport system substrate-binding protein	Bacteria	Proteobacteria	Betaproteobacteria	Burkholderiales	Alcaligenaceae	Paracandidimonas	Paracandidimonas soli	A0A4V2VSP1	Paracandidimonas soli.	263	1917182
MetQ/NlpA family ABC transporter substrate-binding protein	Bacteria	Proteobacteria	Betaproteobacteria	Burkholderiales	Alcaligenaceae	Pusillimonas	Pusillimonas ginsengisoli	A0A4U5LMA9	Pusillimonas ginsengisoli.	262	453575
Metal ABC transporter substrate-binding protein	Bacteria	Proteobacteria	Betaproteobacteria	Burkholderiales	Alcaligenaceae	unclassified Alcaligenaceae	Alcaligenaceae bacterium 429	A0A4S1EIG5	Alcaligenaceae bacterium 429.	271	2562948
ABC transporter substrate-binding protein	Bacteria	Proteobacteria	Betaproteobacteria	Burkholderiales	Alcaligenaceae	unclassified Alcaligenaceae	Alcaligenaceae bacterium 429	A0A4S1E7Q3	Alcaligenaceae bacterium 429.	262	2562948
D-methionine transport system substrate-binding protein	Bacteria	Proteobacteria	Betaproteobacteria	Burkholderiales	Alcaligenaceae	Paracandidimonas	Paracandidimonas soli	A0A4R3UR29	Paracandidimonas soli.	271	1917182
D-methionine transport system substrate-binding protein	Bacteria	Proteobacteria	Betaproteobacteria	Burkholderiales	Alcaligenaceae	Pusillimonas	Pusillimonas sp. YR330	A0A4R1LLI1	Pusillimonas sp. YR330.	263	2135726
Lipoprotein	Bacteria	Proteobacteria	Betaproteobacteria	Burkholderiales	Alcaligenaceae	Pusillimonas	Pusillimonas sp. YR330	A0A4R1LJ19	Pusillimonas sp. YR330.	266	2135726
D-methionine transport system substrate-binding protein	Bacteria	Proteobacteria	Betaproteobacteria	Burkholderiales	Alcaligenaceae	Kerstersia	Kerstersia gyiorum	A0A4Q7MNL9	Kerstersia gyiorum.	298	206506
Lipoprotein	Bacteria	Proteobacteria	Betaproteobacteria	Burkholderiales	Alcaligenaceae	Kerstersia	Kerstersia gyiorum	A0A4Q7MKX7	Kerstersia gyiorum.	282	206506
Iron ABC transporter substrate-binding protein	Bacteria	Proteobacteria	Betaproteobacteria	Burkholderiales	Alcaligenaceae	Achromobacter	Achromobacter aloeverae	A0A4Q1HNA4	Achromobacter aloeverae.	278	1750518
Lipoprotein	Bacteria	Proteobacteria	Betaproteobacteria	Burkholderiales	Alcaligenaceae	Achromobacter	Achromobacter veterisilvae	A0A446CIG7	Achromobacter veterisilvae.	266	2069367
D-methionine-binding lipoprotein MetQ	Bacteria	Proteobacteria	Betaproteobacteria	Burkholderiales	Alcaligenaceae	Achromobacter	Achromobacter agilis	A0A446CGG8	Achromobacter agilis.	273	1353888
Lipoprotein	Bacteria	Proteobacteria	Betaproteobacteria	Burkholderiales	Alcaligenaceae	Candidimonas	Candidimonas sp. SYP-B2681	A0A432DN74	Candidimonas sp. SYP-B2681.	273	2497686
Iron ABC transporter substrate-binding protein	Bacteria	Proteobacteria	Betaproteobacteria	Burkholderiales	Alcaligenaceae	Achromobacter	Achromobacter xylosoxidans	A0A424WF21	Alcaligenes xylosoxydans xylosoxydans	273	85698
MetQ/NlpA family ABC transporter substrate-binding protein	Bacteria	Proteobacteria	Betaproteobacteria	Burkholderiales	Alcaligenaceae	Alcaligenes	Alcaligenes faecalis	A0A411T0W8	Alcaligenes faecalis.	281	511
MetQ/NlpA family ABC transporter substrate-binding protein	Bacteria	Proteobacteria	Betaproteobacteria	Burkholderiales	Alcaligenaceae	Alcaligenes	Alcaligenes faecalis	A0A411T0F8	Alcaligenes faecalis.	275	511
Methionine ABC transporter substrate-binding protein	Bacteria	Proteobacteria	Betaproteobacteria	Burkholderiales	Alcaligenaceae	Pusillimonas	Pusillimonas sp. ye3	A0A410GCS7	Pusillimonas sp. ye3.	263	2028345
D-methionine-binding lipoprotein metQ	Bacteria	Proteobacteria	Betaproteobacteria	Burkholderiales	Alcaligenaceae	Achromobacter	Achromobacter spanius	A0A3S4MZB7	Achromobacter spanius.	264	217203
Lipoprotein	Bacteria	Proteobacteria	Betaproteobacteria	Burkholderiales	Alcaligenaceae	Candidimonas	Candidimonas sp. SYP-B2681	A0A3S0Q1Y8	Candidimonas sp. SYP-B2681.	266	2497686
ABC transporter substrate-binding protein	Bacteria	Proteobacteria	Betaproteobacteria	Burkholderiales	Alcaligenaceae	Candidimonas	Candidimonas sp. SYP-B2681	A0A3S0PMD3	Candidimonas sp. SYP-B2681.	263	2497686
Iron ABC transporter substrate-binding protein	Bacteria	Proteobacteria	Betaproteobacteria	Burkholderiales	Alcaligenaceae	Achromobacter	Achromobacter spanius	A0A3Q9KI90	Achromobacter spanius.	273	217203	y
Metal ABC transporter substrate-binding protein	Bacteria	Proteobacteria	Betaproteobacteria	Burkholderiales	Alcaligenaceae	Pigmentiphaga	Pigmentiphaga sp. H8	A0A3G8GLJ3	Pigmentiphaga sp. H8.	269	2488560
Metal ABC transporter substrate-binding protein	Bacteria	Proteobacteria	Betaproteobacteria	Burkholderiales	Alcaligenaceae	Alcaligenes	Alcaligenes faecalis	A0A3D0KZG0	Alcaligenes faecalis.	281	511
Metal ABC transporter substrate-binding protein	Bacteria	Proteobacteria	Betaproteobacteria	Burkholderiales	Alcaligenaceae	Alcaligenes	Alcaligenes faecalis	A0A3D0KZ58	Alcaligenes faecalis.	274	511
Lipoprotein	Bacteria	Proteobacteria	Betaproteobacteria	Burkholderiales	Alcaligenaceae	Oligella	Oligella ureolytica	A0A378XJ32	Oligella ureolytica.	266	90244
D-methionine-binding lipoprotein metQ	Bacteria	Proteobacteria	Betaproteobacteria	Burkholderiales	Alcaligenaceae	Oligella	Oligella ureolytica	A0A378XEY5	Oligella ureolytica.	262	90244
Lipoprotein	Bacteria	Proteobacteria	Betaproteobacteria	Burkholderiales	Alcaligenaceae	unclassified Alcaligenaceae	Alcaligenaceae bacterium	A0A354K0U0	Alcaligenaceae bacterium.	265	2021368
Lipoprotein	Bacteria	Proteobacteria	Betaproteobacteria	Burkholderiales	Alcaligenaceae	Oligella	Oligella urethralis	A0A2X1VL84	Oligella urethralis.	266	90245
Methionine ABC transporter substrate-binding protein	Bacteria	Proteobacteria	Betaproteobacteria	Burkholderiales	Alcaligenaceae	Corticimicrobacter	Corticimicrobacter populi	A0A2V1K3D8	Corticimicrobacter populi.	262	2175229
Lipoprotein	Bacteria	Proteobacteria	Betaproteobacteria	Burkholderiales	Alcaligenaceae	Corticimicrobacter	Corticimicrobacter populi	A0A2V1K2H0	Corticimicrobacter populi.	268	2175229
Iron ABC transporter substrate-binding protein	Bacteria	Proteobacteria	Betaproteobacteria	Burkholderiales	Alcaligenaceae	Corticimicrobacter	Corticimicrobacter populi	A0A2V1K0L8	Corticimicrobacter populi.	271	2175229
Lipoprotein	Bacteria	Proteobacteria	Betaproteobacteria	Burkholderiales	Alcaligenaceae	Corticimicrobacter	Corticimicrobacter populi	A0A2V1K0C4	Corticimicrobacter populi.	265	2175229
Lipoprotein	Bacteria	Proteobacteria	Betaproteobacteria	Burkholderiales	Alcaligenaceae	Corticimicrobacter	Corticimicrobacter populi	A0A2V1JYQ5	Corticimicrobacter populi.	265	2175229
Metal ABC transporter substrate-binding protein	Bacteria	Proteobacteria	Betaproteobacteria	Burkholderiales	Alcaligenaceae	Corticimicrobacter	Corticimicrobacter populi	A0A2V1JXJ6	Corticimicrobacter populi.	270	2175229
Lipoprotein	Bacteria	Proteobacteria	Betaproteobacteria	Burkholderiales	Alcaligenaceae	Corticimicrobacter	Corticimicrobacter populi	A0A2V1JXA2	Corticimicrobacter populi.	268	2175229
Metal ABC transporter substrate-binding protein	Bacteria	Proteobacteria	Betaproteobacteria	Burkholderiales	Alcaligenaceae	Corticimicrobacter	Corticimicrobacter populi	A0A2V1JX18	Corticimicrobacter populi.	273	2175229
Metal ABC transporter substrate-binding protein	Bacteria	Proteobacteria	Betaproteobacteria	Burkholderiales	Alcaligenaceae	Corticimicrobacter	Corticimicrobacter populi	A0A2V1JVB0	Corticimicrobacter populi.	268	2175229
Metal ABC transporter substrate-binding protein	Bacteria	Proteobacteria	Betaproteobacteria	Burkholderiales	Alcaligenaceae	Alcaligenes	Alcaligenes faecalis	A0A2U2BFJ6	Alcaligenes faecalis.	284	511
MetQ/NlpA family ABC transporter substrate-binding protein	Bacteria	Proteobacteria	Betaproteobacteria	Burkholderiales	Alcaligenaceae	Achromobacter	Achromobacter spanius	A0A2S5GX89	Achromobacter spanius.	262	217203
Methionine ABC transporter substrate-binding protein	Bacteria	Proteobacteria	Betaproteobacteria	Burkholderiales	Alcaligenaceae	Bordetella	Bordetella sp. HZ20	A0A2R4XMU1	Bordetella sp. HZ20.	262	2163011
Iron ABC transporter substrate-binding protein	Bacteria	Proteobacteria	Betaproteobacteria	Burkholderiales	Alcaligenaceae	Achromobacter	Achromobacter pulmonis	A0A2N8KPA7	Achromobacter pulmonis.	273	1389932
Lipoprotein	Bacteria	Proteobacteria	Betaproteobacteria	Burkholderiales	Alcaligenaceae	Pusillimonas	Pusillimonas sp. JR1/69-2-13	A0A2N4UDF2	Pusillimonas sp. JR1/69-2-13.	266	2045209
Metal ABC transporter substrate-binding protein	Bacteria	Proteobacteria	Betaproteobacteria	Burkholderiales	Alcaligenaceae	Pusillimonas	Pusillimonas sp. JR1/69-3-13	A0A2N4U3X3	Pusillimonas sp. JR1/69-3-13.	250	2045210
Iron ABC transporter substrate-binding protein	Bacteria	Proteobacteria	Betaproteobacteria	Burkholderiales	Alcaligenaceae	Achromobacter	Achromobacter sp. AONIH1	A0A2I8DS33	Achromobacter sp. AONIH1.	277	1758194	y
Iron ABC transporter substrate-binding protein	Bacteria	Proteobacteria	Betaproteobacteria	Burkholderiales	Alcaligenaceae	Achromobacter	Achromobacter sp. AONIH1	A0A2I8DML5	Achromobacter sp. AONIH1.	269	1758194
Lipoprotein	Bacteria	Proteobacteria	Betaproteobacteria	Burkholderiales	Alcaligenaceae	Achromobacter	Achromobacter sp. AONIH1	A0A2I8DE95	Achromobacter sp. AONIH1.	266	1758194
Lipoprotein	Bacteria	Proteobacteria	Betaproteobacteria	Burkholderiales	Alcaligenaceae	Achromobacter	Achromobacter sp. AONIH1	A0A2I8DC34	Achromobacter sp. AONIH1.	268	1758194
Methionine ABC transporter substrate-binding protein	Bacteria	Proteobacteria	Betaproteobacteria	Burkholderiales	Alcaligenaceae	Achromobacter	Achromobacter sp. HZ28	A0A2D0AWH7	Achromobacter sp. HZ28.	257	2015171
Lipoprotein	Bacteria	Proteobacteria	Betaproteobacteria	Burkholderiales	Alcaligenaceae	Bordetella	Bordetella genomosp. 6	A0A261W4B1	Bordetella genomosp. 6.	265	463024
Lipoprotein	Bacteria	Proteobacteria	Betaproteobacteria	Burkholderiales	Alcaligenaceae	Bordetella	Bordetella genomosp. 2	A0A261VYZ5	Bordetella genomosp. 2.	265	1983456
Iron ABC transporter substrate-binding protein	Bacteria	Proteobacteria	Betaproteobacteria	Burkholderiales	Alcaligenaceae	Bordetella	Bordetella genomosp. 2	A0A261VPF3	Bordetella genomosp. 2.	269	1983456
Iron ABC transporter substrate-binding protein	Bacteria	Proteobacteria	Betaproteobacteria	Burkholderiales	Alcaligenaceae	Bordetella	Bordetella genomosp. 12	A0A261VME0	Bordetella genomosp. 12.	273	463035
Methionine ABC transporter substrate-binding protein	Bacteria	Proteobacteria	Betaproteobacteria	Burkholderiales	Alcaligenaceae	Bordetella	Bordetella genomosp. 4	A0A261URZ3	Bordetella genomosp. 4.	261	463044
Methionine ABC transporter substrate-binding protein	Bacteria	Proteobacteria	Betaproteobacteria	Burkholderiales	Alcaligenaceae	Bordetella	Bordetella genomosp. 11	A0A261UP13	Bordetella genomosp. 11.	257	1416808
Lipoprotein	Bacteria	Proteobacteria	Betaproteobacteria	Burkholderiales	Alcaligenaceae	Bordetella	Bordetella genomosp. 11	A0A261UKI4	Bordetella genomosp. 11.	266	1416808
Iron ABC transporter substrate-binding protein	Bacteria	Proteobacteria	Betaproteobacteria	Burkholderiales	Alcaligenaceae	Bordetella	Bordetella genomosp. 11	A0A261UEM3	Bordetella genomosp. 11.	276	1416808
Iron ABC transporter substrate-binding protein	Bacteria	Proteobacteria	Betaproteobacteria	Burkholderiales	Alcaligenaceae	Bordetella	Bordetella genomosp. 4	A0A261U3W3	Bordetella genomosp. 4.	269	463044
Methionine ABC transporter substrate-binding protein	Bacteria	Proteobacteria	Betaproteobacteria	Burkholderiales	Alcaligenaceae	Bordetella	Bordetella genomosp. 5	A0A261U2C6	Bordetella genomosp. 5.	262	1395608
Lipoprotein	Bacteria	Proteobacteria	Betaproteobacteria	Burkholderiales	Alcaligenaceae	Bordetella	Bordetella genomosp. 4	A0A261TTF9	Bordetella genomosp. 4.	265	463044
Metal ABC transporter substrate-binding protein	Bacteria	Proteobacteria	Betaproteobacteria	Burkholderiales	Alcaligenaceae	Bordetella	Bordetella genomosp. 5	A0A261TRJ0	Bordetella genomosp. 5.	258	1395608
Iron ABC transporter substrate-binding protein	Bacteria	Proteobacteria	Betaproteobacteria	Burkholderiales	Alcaligenaceae	Bordetella	Bordetella genomosp. 5	A0A261TRD2	Bordetella genomosp. 5.	276	1395608
Lipoprotein	Bacteria	Proteobacteria	Betaproteobacteria	Burkholderiales	Alcaligenaceae	Bordetella	Bordetella genomosp. 5	A0A261TQA5	Bordetella genomosp. 5.	275	1395608
Lipoprotein	Bacteria	Proteobacteria	Betaproteobacteria	Burkholderiales	Alcaligenaceae	Bordetella	Bordetella genomosp. 5	A0A261TE98	Bordetella genomosp. 5.	265	1395608
Metal ABC transporter substrate-binding protein	Bacteria	Proteobacteria	Betaproteobacteria	Burkholderiales	Alcaligenaceae	Bordetella	Bordetella genomosp. 10	A0A261SMJ4	Bordetella genomosp. 10.	263	1416804
Lipoprotein	Bacteria	Proteobacteria	Betaproteobacteria	Burkholderiales	Alcaligenaceae	Bordetella	Bordetella genomosp. 10	A0A261SLB9	Bordetella genomosp. 10.	276	1416804
Lipoprotein	Bacteria	Proteobacteria	Betaproteobacteria	Burkholderiales	Alcaligenaceae	Bordetella	Bordetella genomosp. 10	A0A261SK79	Bordetella genomosp. 10.	268	1416804
Lipoprotein	Bacteria	Proteobacteria	Betaproteobacteria	Burkholderiales	Alcaligenaceae	Bordetella	Bordetella genomosp. 1	A0A261SG77	Bordetella genomosp. 1.	281	1395607
Metal ABC transporter substrate-binding protein	Bacteria	Proteobacteria	Betaproteobacteria	Burkholderiales	Alcaligenaceae	Bordetella	Bordetella genomosp. 1	A0A261SG59	Bordetella genomosp. 1.	294	1395607
Iron ABC transporter substrate-binding protein	Bacteria	Proteobacteria	Betaproteobacteria	Burkholderiales	Alcaligenaceae	Bordetella	Bordetella genomosp. 10	A0A261SAS3	Bordetella genomosp. 10.	278	1416804
Lipoprotein	Bacteria	Proteobacteria	Betaproteobacteria	Burkholderiales	Alcaligenaceae	Bordetella	Bordetella genomosp. 1	A0A261S7X2	Bordetella genomosp. 1.	272	1395607
Iron ABC transporter substrate-binding protein	Bacteria	Proteobacteria	Betaproteobacteria	Burkholderiales	Alcaligenaceae	Bordetella	Bordetella genomosp. 7	A0A261RE76	Bordetella genomosp. 7.	269	1416805
Lipoprotein	Bacteria	Proteobacteria	Betaproteobacteria	Burkholderiales	Alcaligenaceae	Achromobacter	Achromobacter sp. HZ28	A0A246PZR9	Achromobacter sp. HZ28.	274	2015171
Lipoprotein	Bacteria	Proteobacteria	Betaproteobacteria	Burkholderiales	Alcaligenaceae	Bordetella	Bordetella genomosp. 13	A0A1W6ZG80	Bordetella genomosp. 13.	265	463040
Iron ABC transporter substrate-binding protein	Bacteria	Proteobacteria	Betaproteobacteria	Burkholderiales	Alcaligenaceae	Bordetella	Bordetella genomosp. 13	A0A1W6Z9Q1	Bordetella genomosp. 13.	271	463040
Metal ABC transporter substrate-binding protein	Bacteria	Proteobacteria	Betaproteobacteria	Burkholderiales	Alcaligenaceae	Bordetella	Bordetella genomosp. 13	A0A1W6Z951	Bordetella genomosp. 13.	270	463040
Metal ABC transporter substrate-binding protein	Bacteria	Proteobacteria	Betaproteobacteria	Burkholderiales	Alcaligenaceae	Bordetella	Bordetella genomosp. 13	A0A1W6Z8V3	Bordetella genomosp. 13.	279	463040
Metal ABC transporter substrate-binding protein	Bacteria	Proteobacteria	Betaproteobacteria	Burkholderiales	Alcaligenaceae	Bordetella	Bordetella genomosp. 13	A0A1W6Z8K1	Bordetella genomosp. 13.	275	463040
Methionine ABC transporter substrate-binding protein	Bacteria	Proteobacteria	Betaproteobacteria	Burkholderiales	Alcaligenaceae	Bordetella	Bordetella genomosp. 13	A0A1W6Z7G4	Bordetella genomosp. 13.	262	463040
Lipoprotein	Bacteria	Proteobacteria	Betaproteobacteria	Burkholderiales	Alcaligenaceae	Bordetella	Bordetella genomosp. 9	A0A1W6Z4E6	Bordetella genomosp. 9.	285	1416803
Iron ABC transporter substrate-binding protein	Bacteria	Proteobacteria	Betaproteobacteria	Burkholderiales	Alcaligenaceae	Bordetella	Bordetella genomosp. 9	A0A1W6Z0L9	Bordetella genomosp. 9.	276	1416803
Lipoprotein	Bacteria	Proteobacteria	Betaproteobacteria	Burkholderiales	Alcaligenaceae	Bordetella	Bordetella genomosp. 9	A0A1W6YX24	Bordetella genomosp. 9.	266	1416803
Methionine ABC transporter substrate-binding protein	Bacteria	Proteobacteria	Betaproteobacteria	Burkholderiales	Alcaligenaceae	Bordetella	Bordetella genomosp. 8	A0A1W6YVX0	Bordetella genomosp. 8.	261	1416806
Lipoprotein	Bacteria	Proteobacteria	Betaproteobacteria	Burkholderiales	Alcaligenaceae	Bordetella	Bordetella genomosp. 8	A0A1W6YQ89	Bordetella genomosp. 8.	266	1416806
Iron ABC transporter substrate-binding protein	Bacteria	Proteobacteria	Betaproteobacteria	Burkholderiales	Alcaligenaceae	Bordetella	Bordetella genomosp. 8	A0A1W6YK97	Bordetella genomosp. 8.	286	1416806
Methionine ABC transporter substrate-binding protein	Bacteria	Proteobacteria	Betaproteobacteria	Burkholderiales	Alcaligenaceae	Paenalcaligenes	Paenalcaligenes hominis	A0A1U9K238	Paenalcaligenes hominis.	260	643674
Lipoprotein	Bacteria	Proteobacteria	Betaproteobacteria	Burkholderiales	Alcaligenaceae	Candidimonas	Candidimonas bauzanensis	A0A1M5X5E9	Candidimonas bauzanensis.	266	658167
D-methionine transport system substrate-binding protein	Bacteria	Proteobacteria	Betaproteobacteria	Burkholderiales	Alcaligenaceae	Candidimonas	Candidimonas bauzanensis	A0A1M5WXH8	Candidimonas bauzanensis.	263	658167
Lipoprotein	Bacteria	Proteobacteria	Betaproteobacteria	Burkholderiales	Alcaligenaceae	Candidimonas	Candidimonas bauzanensis	A0A1M5SNF4	Candidimonas bauzanensis.	271	658167
Lipoprotein	Bacteria	Proteobacteria	Betaproteobacteria	Burkholderiales	Alcaligenaceae	Orrella	Orrella dioscoreae	A0A1C3K793	Orrella dioscoreae.	266	1851544
Methionine ABC transporter substrate-binding protein	Bacteria	Proteobacteria	Betaproteobacteria	Burkholderiales	Alcaligenaceae	Orrella	Orrella dioscoreae	A0A1C3K6K8	Orrella dioscoreae.	273	1851544
Lipoprotein	Bacteria	Proteobacteria	Betaproteobacteria	Burkholderiales	Alcaligenaceae	Orrella	Orrella dioscoreae	A0A1C3K6J9	Orrella dioscoreae.	272	1851544
Methionine ABC transporter substrate-binding protein	Bacteria	Proteobacteria	Betaproteobacteria	Burkholderiales	Alcaligenaceae	Orrella	Orrella dioscoreae	A0A1C3K6F0	Orrella dioscoreae.	268	1851544
Methionine ABC transporter substrate-binding protein	Bacteria	Proteobacteria	Betaproteobacteria	Burkholderiales	Alcaligenaceae	Orrella	Orrella dioscoreae	A0A1C3K516	Orrella dioscoreae.	261	1851544
Methionine ABC transporter substrate-binding protein	Bacteria	Proteobacteria	Betaproteobacteria	Burkholderiales	Alcaligenaceae	Orrella	Orrella dioscoreae	A0A1C3K023	Orrella dioscoreae.	265	1851544
Methionine ABC transporter substrate-binding protein	Bacteria	Proteobacteria	Betaproteobacteria	Burkholderiales	Alcaligenaceae	Orrella	Orrella dioscoreae	A0A1C3JWX8	Orrella dioscoreae.	264	1851544
Methionine ABC transporter substrate-binding protein	Bacteria	Proteobacteria	Betaproteobacteria	Burkholderiales	Alcaligenaceae	Bordetella	Bordetella sp. H567	A0A1B2RAE2	Bordetella sp. H567.	246	1697043
Methionine ABC transporter substrate-binding protein	Bacteria	Proteobacteria	Betaproteobacteria	Burkholderiales	Alcaligenaceae	Bordetella	Bordetella sp. H567	A0A1B2R852	Bordetella sp. H567.	261	1697043
Lipoprotein	Bacteria	Proteobacteria	Betaproteobacteria	Burkholderiales	Alcaligenaceae	Bordetella	Bordetella sp. H567	A0A1B2R621	Bordetella sp. H567.	266	1697043
Iron ABC transporter substrate-binding protein	Bacteria	Proteobacteria	Betaproteobacteria	Burkholderiales	Alcaligenaceae	Bordetella	Bordetella sp. H567	A0A1B2R275	Bordetella sp. H567.	279	1697043
Methionine ABC transporter substrate-binding protein	Bacteria	Proteobacteria	Betaproteobacteria	Burkholderiales	Alcaligenaceae	Bordetella	Bordetella flabilis	A0A193GN06	Bordetella flabilis.	263	463014
Iron ABC transporter substrate-binding protein	Bacteria	Proteobacteria	Betaproteobacteria	Burkholderiales	Alcaligenaceae	Bordetella	Bordetella flabilis	A0A193GF18	Bordetella flabilis.	276	463014
Lipoprotein	Bacteria	Proteobacteria	Betaproteobacteria	Burkholderiales	Alcaligenaceae	Bordetella	Bordetella flabilis	A0A193GAU5	Bordetella flabilis.	266	463014
Methionine ABC transporter substrate-binding protein	Bacteria	Proteobacteria	Betaproteobacteria	Burkholderiales	Alcaligenaceae	Bordetella	Bordetella bronchialis	A0A193FRT3	Bordetella bronchialis.	260	463025
Iron ABC transporter substrate-binding protein	Bacteria	Proteobacteria	Betaproteobacteria	Burkholderiales	Alcaligenaceae	Bordetella	Bordetella bronchialis	A0A193FPL9	Bordetella bronchialis.	264	463025
D-methionine transport system substrate-binding protein	Bacteria	Proteobacteria	Betaproteobacteria	Burkholderiales	Alcaligenaceae	Kerstersia	Kerstersia gyiorum	A0A171KS49	Kerstersia gyiorum.	268	206506
D-methionine transport system substrate-binding protein	Bacteria	Proteobacteria	Betaproteobacteria	Burkholderiales	Alcaligenaceae	Kerstersia	Kerstersia gyiorum	A0A171KRX7	Kerstersia gyiorum.	262	206506
Uncharacterized protein	Bacteria	Proteobacteria	Betaproteobacteria	Burkholderiales	Alcaligenaceae	Kerstersia	Kerstersia gyiorum	A0A171KNN1	Kerstersia gyiorum.	278	206506
D-methionine transport system substrate-binding protein	Bacteria	Proteobacteria	Betaproteobacteria	Burkholderiales	Alcaligenaceae	Kerstersia	Kerstersia gyiorum	A0A171KNL1	Kerstersia gyiorum.	270	206506
Uncharacterized protein	Bacteria	Proteobacteria	Betaproteobacteria	Burkholderiales	Alcaligenaceae	Kerstersia	Kerstersia gyiorum	A0A171KNK9	Kerstersia gyiorum.	271	206506
Uncharacterized protein	Bacteria	Proteobacteria	Betaproteobacteria	Burkholderiales	Alcaligenaceae	Kerstersia	Kerstersia gyiorum	A0A171KNK7	Kerstersia gyiorum.	275	206506
D-methionine ABC transporter substrate-binding protein	Bacteria	Proteobacteria	Betaproteobacteria	Burkholderiales	Alcaligenaceae	Bordetella	Bordetella ansorpii	A0A157SX51	Bordetella ansorpii.	277	288768
D-methionine ABC transporter substrate-binding protein	Bacteria	Proteobacteria	Betaproteobacteria	Burkholderiales	Alcaligenaceae	Bordetella	Bordetella trematum	A0A157SKX8	Bordetella trematum.	258	123899
D-methionine ABC transporter substrate-binding protein	Bacteria	Proteobacteria	Betaproteobacteria	Burkholderiales	Alcaligenaceae	Bordetella	Bordetella trematum	A0A157SBF5	Bordetella trematum.	260	123899
Lipoprotein	Bacteria	Proteobacteria	Betaproteobacteria	Burkholderiales	Alcaligenaceae	Bordetella	Bordetella ansorpii	A0A157S684	Bordetella ansorpii.	265	288768
D-methionine ABC transporter substrate-binding protein	Bacteria	Proteobacteria	Betaproteobacteria	Burkholderiales	Alcaligenaceae	Bordetella	Bordetella trematum	A0A157RDJ3	Bordetella trematum.	263	123899
D-methionine ABC transporter substrate-binding protein	Bacteria	Proteobacteria	Betaproteobacteria	Burkholderiales	Alcaligenaceae	Bordetella	Bordetella trematum	A0A157QTV8	Bordetella trematum.	264	123899
D-methionine ABC transporter substrate-binding protein	Bacteria	Proteobacteria	Betaproteobacteria	Burkholderiales	Alcaligenaceae	Bordetella	Bordetella ansorpii	A0A157Q648	Bordetella ansorpii.	292	288768
Lipoprotein	Bacteria	Proteobacteria	Betaproteobacteria	Burkholderiales	Alcaligenaceae	Bordetella	Bordetella ansorpii	A0A157Q553	Bordetella ansorpii.	275	288768
Lipoprotein	Bacteria	Proteobacteria	Betaproteobacteria	Burkholderiales	Alcaligenaceae	Bordetella	Bordetella ansorpii	A0A157Q4W2	Bordetella ansorpii.	267	288768
Lipoprotein	Bacteria	Proteobacteria	Betaproteobacteria	Burkholderiales	Alcaligenaceae	Bordetella	Bordetella ansorpii	A0A157NPV4	Bordetella ansorpii.	265	288768
D-methionine ABC transporter substrate-binding protein	Bacteria	Proteobacteria	Betaproteobacteria	Burkholderiales	Alcaligenaceae	Bordetella	Bordetella trematum	A0A157KCU6	Bordetella trematum.	268	123899
Lipoprotein	Bacteria	Proteobacteria	Betaproteobacteria	Burkholderiales	Alcaligenaceae	Bordetella	Bordetella trematum	A0A157K691	Bordetella trematum.	266	123899
Iron ABC transporter substrate-binding protein	Bacteria	Proteobacteria	Betaproteobacteria	Burkholderiales	Alcaligenaceae	Bordetella	Bordetella sp. N	A0A0S1Y9W4	Bordetella sp. N.	267	1746199
Lipoprotein	Bacteria	Proteobacteria	Betaproteobacteria	Burkholderiales	Alcaligenaceae	Bordetella	Bordetella sp. N	A0A0S1Y9U5	Bordetella sp. N.	276	1746199
Lipoprotein	Bacteria	Proteobacteria	Betaproteobacteria	Burkholderiales	Alcaligenaceae	Bordetella	Bordetella sp. N	A0A0S1Y8N7	Bordetella sp. N.	276	1746199
Lipoprotein	Bacteria	Proteobacteria	Betaproteobacteria	Burkholderiales	Alcaligenaceae	Bordetella	Bordetella sp. N	A0A0S1Y8L9	Bordetella sp. N.	265	1746199
Methionine ABC transporter substrate-binding protein	Bacteria	Proteobacteria	Betaproteobacteria	Burkholderiales	Alcaligenaceae	Bordetella	Bordetella sp. N	A0A0S1Y531	Bordetella sp. N.	263	1746199
Lipoprotein	Bacteria	Proteobacteria	Betaproteobacteria	Burkholderiales	Alcaligenaceae	Achromobacter	Achromobacter sp. Root565	A0A0Q8C1Z6	Achromobacter sp. Root565.	278	1736564
Iron ABC transporter substrate-binding protein	Bacteria	Proteobacteria	Betaproteobacteria	Burkholderiales	Alcaligenaceae	Achromobacter	Achromobacter sp. Root565	A0A0Q8C1Z1	Achromobacter sp. Root565.	263	1736564
D-methionine-binding lipoprotein metQ	Bacteria	Proteobacteria	Betaproteobacteria	Burkholderiales	Alcaligenaceae	Achromobacter	Achromobacter sp.	A0A0M7JLL6	Achromobacter sp.	273	134375
Lipoprotein	Bacteria	Proteobacteria	Betaproteobacteria	Burkholderiales	Alcaligenaceae	Achromobacter	Achromobacter xylosoxidans	A0A0M7I2F4	Alcaligenes xylosoxydans xylosoxydans	268	85698
Lipoprotein	Bacteria	Proteobacteria	Betaproteobacteria	Burkholderiales	Alcaligenaceae	Achromobacter	Achromobacter xylosoxidans	A0A0M7FRC5	Alcaligenes xylosoxydans xylosoxydans	265	85698
Lipoprotein	Bacteria	Proteobacteria	Betaproteobacteria	Burkholderiales	Alcaligenaceae	Achromobacter	Achromobacter sp.	A0A0M7D9Q2	Achromobacter sp.	266	134375
MetQ/NlpA family ABC transporter substrate-binding protein	Bacteria	Proteobacteria	Betaproteobacteria	Burkholderiales	Alcaligenaceae	Alcaligenes	Alcaligenes faecalis	A0A0M7BY89	Alcaligenes faecalis.	263	511
Methionine ABC transporter substrate-binding protein	Bacteria	Proteobacteria	Betaproteobacteria	Burkholderiales	Alcaligenaceae	Achromobacter	Achromobacter sp. DMS1	A0A0L8ER85	Achromobacter sp. DMS1.	260	1688405
Lipoprotein	Bacteria	Proteobacteria	Betaproteobacteria	Burkholderiales	Alcaligenaceae	Achromobacter	Achromobacter sp. DMS1	A0A0L8EP35	Achromobacter sp. DMS1.	265	1688405
D-methionine ABC transporter substrate-binding protein	Bacteria	Proteobacteria	Betaproteobacteria	Burkholderiales	Alcaligenaceae	Bordetella	Bordetella hinzii	A0A0H4X465	Bordetella hinzii.	262	103855
D-methionine ABC transporter substrate-binding protein	Bacteria	Proteobacteria	Betaproteobacteria	Burkholderiales	Alcaligenaceae	Bordetella	Bordetella hinzii	A0A0H4W062	Bordetella hinzii.	273	103855
Putative exported protein	Bacteria	Proteobacteria	Betaproteobacteria	Burkholderiales	Alcaligenaceae	Bordetella	Bordetella bronchiseptica RB50	A0A0H3LU24	Bordetella bronchiseptica (strain ATCC BAA-588 / NCTC 13252 / RB50)	271	257310
D-methionine-binding lipoprotein metQ	Bacteria	Proteobacteria	Betaproteobacteria	Burkholderiales	Alcaligenaceae	Achromobacter	Achromobacter xylosoxidans	A0A0D6ITF3	Alcaligenes xylosoxydans xylosoxydans	262	85698
Lipoprotein	Bacteria	Proteobacteria	Betaproteobacteria	Burkholderiales	Alcaligenaceae	Achromobacter	Achromobacter xylosoxidans	A0A0D6I586	Alcaligenes xylosoxydans xylosoxydans	279	85698
D-methionine-binding lipoprotein metQ	Bacteria	Proteobacteria	Betaproteobacteria	Burkholderiales	Alcaligenaceae	Achromobacter	Achromobacter xylosoxidans	A0A0D6HKA5	Alcaligenes xylosoxydans xylosoxydans	273	85698
Lipoprotein	Bacteria	Proteobacteria	Betaproteobacteria	Burkholderiales	Alcaligenaceae	Achromobacter	Achromobacter xylosoxidans	A0A0D6FK81	Alcaligenes xylosoxydans xylosoxydans	277	85698
Methionine ABC transporter substrate-binding protein	Bacteria	Proteobacteria	Betaproteobacteria	Burkholderiales	Alcaligenaceae	Oligella	Oligella urethralis DNF00040	A0A096BA65	Oligella urethralis DNF00040.	262	1401065
Lipoprotein	Bacteria	Proteobacteria	Betaproteobacteria	Burkholderiales	Alcaligenaceae	Achromobacter	Achromobacter sp. RTa	A0A095WM29	Achromobacter sp. RTa.	271	1532557
Methionine ABC transporter substrate-binding protein	Bacteria	Proteobacteria	Betaproteobacteria	Burkholderiales	Alcaligenaceae	Basilea	Basilea psittacipulmonis DSM 24701	A0A077DJS8	Basilea psittacipulmonis DSM 24701.	263	1072685
Uncharacterized protein	Bacteria	Proteobacteria	Deltaproteobacteria	Syntrophobacterales	Syntrophorhabdaceae	Syntrophorhabdus	Syntrophorhabdus sp. PtaU1.Bin153	A0A1V5DEC3	Syntrophorhabdus sp. PtaU1.Bin153.	296	1811705
D-methionine-binding lipoprotein MetQ	Bacteria	Proteobacteria	Deltaproteobacteria	Syntrophobacterales	Syntrophorhabdaceae	Syntrophorhabdus	Syntrophorhabdus sp. PtaU1.Bin058	A0A1V5DDY0	Syntrophorhabdus sp. PtaU1.Bin058.	270	1811704	y
Lipoprotein	Bacteria	Proteobacteria	Deltaproteobacteria	Syntrophobacterales	Syntrophorhabdaceae	unclassified Syntrophorhabdaceae	Syntrophorhabdaceae bacterium PtaU1.Bin034	A0A1V5CDL0	Syntrophorhabdaceae bacterium PtaU1.Bin034.	292	1811715	y
D-methionine-binding lipoprotein MetQ	Bacteria	Proteobacteria	Deltaproteobacteria	Syntrophobacterales	Syntrophorhabdaceae	Syntrophorhabdus	Syntrophorhabdus sp. PtaB.Bin047	A0A1V4WKP7	Syntrophorhabdus sp. PtaB.Bin047.	270	1811700	y
Lipoprotein	Bacteria	Proteobacteria	Deltaproteobacteria	Myxococcales	Polyangiaceae	Sorangium	Sorangium cellulosum So0157-2	S4XNC9	Sorangium cellulosum So0157-2.	276	1254432	y
Lipoprotein	Bacteria	Proteobacteria	Deltaproteobacteria	Myxococcales	Polyangiaceae	Sorangium	Sorangium cellulosum	A0A4P2PTV4	Sorangium cellulosum	276	56	y
Lipoprotein	Bacteria	Proteobacteria	Deltaproteobacteria	Myxococcales	Polyangiaceae	Pajaroellobacter	Pajaroellobacter abortibovis	A0A1L6MY53	Pajaroellobacter abortibovis.	270	1882918	y
Lipoprotein	Bacteria	Proteobacteria	Deltaproteobacteria	Myxococcales	Polyangiaceae	Chondromyces	Chondromyces crocatus	A0A0K1E9Q2	Chondromyces crocatus.	273	52	y
Lipoprotein	Bacteria	Proteobacteria	Deltaproteobacteria	Myxococcales	Myxococcaceae	Corallococcus	Corallococcus sp. CAG:1435	R5VW14	Corallococcus sp. CAG:1435.	269	1262867	y
Lipoprotein	Bacteria	Proteobacteria	Deltaproteobacteria	Myxococcales	Myxococcaceae	Myxococcus	Myxococcus xanthus DK 1622	Q1DDP6	Myxococcus xanthus (strain DK 1622)	277	246197	y
Lipoprotein	Bacteria	Proteobacteria	Deltaproteobacteria	Myxococcales	Myxococcaceae	Myxococcus	Myxococcus stipitatus DSM 14675	L7U3E6	Myxococcus stipitatus (strain DSM 14675 / JCM 12634 / Mx s8)	282	1278073	y
Lipoprotein	Bacteria	Proteobacteria	Deltaproteobacteria	Myxococcales	Myxococcaceae	Corallococcus	Corallococcus coralloides DSM 2259	H8MJL4	Corallococcus coralloides (strain ATCC 25202 / DSM 2259 / NBRC 100086 / M2)	271	1144275	y
Lipoprotein	Bacteria	Proteobacteria	Deltaproteobacteria	Myxococcales	Myxococcaceae	Corallococcus	Corallococcus sp. Z5C101001	A0A554GRA0	Corallococcus sp. Z5C101001.	268	2596829	y
Lipoprotein	Bacteria	Proteobacteria	Deltaproteobacteria	Myxococcales	Myxococcaceae	Myxococcus	Myxococcus fulvus	A0A511SUA8	Myxococcus fulvus.	282	33	y
Lipoprotein	Bacteria	Proteobacteria	Deltaproteobacteria	Myxococcales	Myxococcaceae	Corallococcus	Corallococcus sp. H22C18031201	A0A3A5GCM8	Corallococcus sp. H22C18031201.	274	2249217	y
Lipoprotein	Bacteria	Proteobacteria	Deltaproteobacteria	Myxococcales	Myxococcaceae	Myxococcus	Myxococcus hansupus	A0A0H4X1S2	Myxococcus hansupus.	277	1297742	y
Lipoprotein	Bacteria	Proteobacteria	Deltaproteobacteria	Myxococcales	Labilitrichaceae	Labilithrix	Labilithrix luteola	A0A0K1Q529	Labilithrix luteola.	278	1391654	y
Lipoprotein	Bacteria	Proteobacteria	Deltaproteobacteria	Desulfuromonadales	Geobacteraceae	'Geomonas' Xu et al. 2019	Geomonas terrae	A0A4S1CNA9	Geomonas terrae.	282	2562681	y
Lipoprotein	Bacteria	Proteobacteria	Deltaproteobacteria	Desulfuromonadales	Geobacteraceae	Geobacter	Geobacter pickeringii	A0A0B5B6Q3	Geobacter pickeringii.	268	345632	y
Lipoprotein	Bacteria	Proteobacteria	Deltaproteobacteria	Desulfovibrionales	Desulfovibrionaceae	Desulfovibrio	Desulfovibrio sp. 6_1_46AFAA	G1UUY7	Desulfovibrio sp. 6_1_46AFAA.	266	665942
Lipoprotein	Bacteria	Proteobacteria	Deltaproteobacteria	Desulfovibrionales	Desulfovibrionaceae	Bilophila	Bilophila wadsworthia 3_1_6	E5Y5G4	Bilophila wadsworthia 3_1_6.	269	563192
NLPA lipoprotein	Bacteria	Proteobacteria	Deltaproteobacteria	Desulfovibrionales	Desulfovibrionaceae	Desulfovibrio	Desulfovibrio desulfuricans ATCC 27774	B8J117	Desulfovibrio desulfuricans (strain ATCC 27774 / DSM 6949)	258	525146
Lipoprotein	Bacteria	Proteobacteria	Deltaproteobacteria	Desulfovibrionales	Desulfovibrionaceae	Desulfovibrio	Desulfovibrio piger ATCC 29098	B6WSL7	Desulfovibrio piger ATCC 29098.	265	411464
MetQ/NlpA family ABC transporter substrate-binding protein	Bacteria	Proteobacteria	Deltaproteobacteria	Desulfovibrionales	Desulfovibrionaceae	Desulfovibrio	Desulfovibrio sp. OH1186_COT-070	A0A3P2A066	Desulfovibrio sp. OH1186_COT-070.	258	2491045
Metal ABC transporter substrate-binding protein	Bacteria	Proteobacteria	Deltaproteobacteria	Desulfovibrionales	Desulfovibrionaceae	unclassified Desulfovibrionaceae	Desulfovibrionaceae bacterium	A0A316N396	Desulfovibrionaceae bacterium.	264	2049043
Lipoprotein	Bacteria	Proteobacteria	Deltaproteobacteria	Desulfovibrionales	Desulfovibrionaceae	unclassified Desulfovibrionaceae	Desulfovibrionaceae bacterium	A0A2V2G6G4	Desulfovibrionaceae bacterium.	265	2049043
DL-methionine transporter subunit periplasmic-binding component of ABC superfamily	Bacteria	Proteobacteria	Deltaproteobacteria	Desulfovibrionales	Desulfovibrionaceae	Desulfovibrio	uncultured Desulfovibrio sp.	A0A212LB65	uncultured Desulfovibrio sp.	258	167968
Predicted ABC-type transporter| periplasmic component	Bacteria	Proteobacteria	Deltaproteobacteria	Desulfovibrionales	Desulfovibrionaceae	Desulfovibrio	uncultured Desulfovibrio sp.	A0A212JQU4	uncultured Desulfovibrio sp.	270	167968	y
Outer membrane lipoprotein 3	Bacteria	Proteobacteria	Deltaproteobacteria	Desulfovibrionales	Desulfovibrionaceae	Desulfovibrio	uncultured Desulfovibrio sp.	A0A212J1L8	uncultured Desulfovibrio sp.	258	167968
Metal ABC transporter substrate-binding protein	Bacteria	Proteobacteria	Deltaproteobacteria	Desulfovibrionales	Desulfovibrionaceae	Desulfovibrio	Desulfovibrio sp. An276	A0A1Y4D7J0	Desulfovibrio sp. An276.	264	1965618
Methionine ABC transporter substrate-binding protein	Bacteria	Proteobacteria	Deltaproteobacteria	Desulfovibrionales	Desulfovibrionaceae	Desulfovibrio	Candidatus Desulfovibrio trichonymphae	A0A1J1E278	Candidatus Desulfovibrio trichonymphae.	260	1725232
D-methionine transport system substrate-binding protein	Bacteria	Proteobacteria	Deltaproteobacteria	Desulfovibrionales	Desulfovibrionaceae	Desulfovibrio	Desulfovibrio legallii	A0A1G7JMZ0	Desulfovibrio legallii.	258	571438
Lipoprotein	Bacteria	Proteobacteria	Deltaproteobacteria	Desulfovibrionales	Desulfomicrobiaceae	Desulfomicrobium	Desulfomicrobium orale DSM 12838	A0A0X8JNM9	Desulfomicrobium orale DSM 12838.	265	888061
D-methionine transport system substrate-binding protein	Bacteria	Proteobacteria	Deltaproteobacteria	Desulfobacterales	Desulfobulbaceae	Desulfofustis	Desulfofustis glycolicus DSM 9705	A0A1M5YQN1	Desulfofustis glycolicus DSM 9705.	269	1121409
D-methionine transport system substrate-binding protein	Bacteria	Proteobacteria	Deltaproteobacteria	Desulfobacterales	Desulfobulbaceae	Desulfofustis	Desulfofustis glycolicus DSM 9705	A0A1M5WQF1	Desulfofustis glycolicus DSM 9705.	269	1121409
Lipoprotein	Bacteria	Proteobacteria	Deltaproteobacteria	Desulfobacterales	Desulfobacteraceae	Desulfosarcina	Desulfosarcina widdelii	A0A5K7YWU7	Desulfosarcina widdelii.	266	947919
Methionine ABC transporter substrate-binding protein	Bacteria	Proteobacteria	Deltaproteobacteria	Myxococcales	Archangiaceae	Cystobacter	Cystobacter fuscus DSM 2262	S9NZ49	Cystobacter fuscus DSM 2262.	258	1242864
Lipoprotein	Bacteria	Proteobacteria	Deltaproteobacteria	Myxococcales	Archangiaceae	Cystobacter	Cystobacter fuscus DSM 2262	S9NU04	Cystobacter fuscus DSM 2262.	280	1242864	y
ABC D-methionine uptake transporter| substrate-binding protein	Bacteria	Proteobacteria	Deltaproteobacteria	Myxococcales	Archangiaceae	Stigmatella	Stigmatella aurantiaca DW4/3-1	Q08QR2	Stigmatella aurantiaca (strain DW4/3-1)	263	378806	y
Lipoprotein	Bacteria	Proteobacteria	Deltaproteobacteria	Myxococcales	Archangiaceae	Vitiosangium	Vitiosangium sp. GDMCC 1.1324	A0A2T4V4C2	Vitiosangium sp. GDMCC 1.1324.	281	2138576	y
Lipoprotein	Bacteria	Proteobacteria	Epsilonproteobacteria	Campylobacterales	Helicobacteraceae	Helicobacter	Helicobacter macacae MIT 99-5501	V8C5B3	Helicobacter macacae MIT 99-5501.	275	1357400
Lipoprotein	Bacteria	Proteobacteria	Epsilonproteobacteria	Campylobacterales	Helicobacteraceae	Helicobacter	Helicobacter macacae MIT 99-5501	V8C585	Helicobacter macacae MIT 99-5501.	267	1357400	y
Lipoprotein	Bacteria	Proteobacteria	Epsilonproteobacteria	Campylobacterales	Helicobacteraceae	Helicobacter	Helicobacter hepaticus ATCC 51449	Q7VI94	Helicobacter hepaticus (strain ATCC 51449 / 3B1)	277	235279	y
Lipoprotein	Bacteria	Proteobacteria	Epsilonproteobacteria	Campylobacterales	Helicobacteraceae	Wolinella	Wolinella succinogenes DSM 1740	Q7M814	Wolinella succinogenes (strain ATCC 29543 / DSM 1740 / LMG 7466 /NCTC 11488 / FDC 602W)	276	273121	y
Lipoprotein	Bacteria	Proteobacteria	Epsilonproteobacteria	Campylobacterales	Helicobacteraceae	Helicobacter	Helicobacter pylori GAM210Bi	M3L4Q4	Helicobacter pylori GAM210Bi.	297	1159032
Lipoprotein	Bacteria	Proteobacteria	Epsilonproteobacteria	Campylobacterales	Helicobacteraceae	Helicobacter	Helicobacter cinaedi CCUG 18818 = ATCC BAA-847	I7HE63	Helicobacter cinaedi CCUG 18818 = ATCC BAA-847.	273	537971	y
Lipoprotein	Bacteria	Proteobacteria	Epsilonproteobacteria	Campylobacterales	Helicobacteraceae	Helicobacter	Helicobacter cetorum MIT 99-5656	I0ES48	Helicobacter cetorum (strain ATCC BAA-540 / MIT 99-5656)	268	1163745
Lipoprotein	Bacteria	Proteobacteria	Epsilonproteobacteria	Campylobacterales	Helicobacteraceae	Helicobacter	Helicobacter cetorum MIT 00-7128	I0EKB2	Helicobacter cetorum (strain ATCC BAA-429 / MIT 00-7128)	271	182217	y
Putative outer membrane lipoprotein	Bacteria	Proteobacteria	Epsilonproteobacteria	Campylobacterales	Helicobacteraceae	Helicobacter	Helicobacter mustelae 12198	D3UJH1	Helicobacter mustelae (strain ATCC 43772 / LMG 18044 / NCTC 12198 / 12198)	263	679897	y
Putative outer membrane lipoprotein	Bacteria	Proteobacteria	Epsilonproteobacteria	Campylobacterales	Helicobacteraceae	Helicobacter	Helicobacter mustelae 12198	D3UJH0	Helicobacter mustelae (strain ATCC 43772 / LMG 18044 / NCTC 12198 / 12198)	259	679897	y
Lipoprotein	Bacteria	Proteobacteria	Epsilonproteobacteria	Campylobacterales	Helicobacteraceae	Helicobacter	Helicobacter canadensis MIT 98-5491	C5ZWD9	Helicobacter canadensis MIT 98-5491.	272	537970	y
Lipoprotein	Bacteria	Proteobacteria	Epsilonproteobacteria	Campylobacterales	Helicobacteraceae	Helicobacter	Helicobacter canadensis MIT 98-5491	C5ZV51	Helicobacter canadensis MIT 98-5491.	270	537970	y
Lipoprotein	Bacteria	Proteobacteria	Epsilonproteobacteria	Campylobacterales	Helicobacteraceae	Helicobacter	Helicobacter jaachi	A0A4U8T992	Helicobacter jaachi.	275	1677920	y
Lipoprotein	Bacteria	Proteobacteria	Epsilonproteobacteria	Campylobacterales	Helicobacteraceae	Helicobacter	Helicobacter jaachi	A0A4U8T976	Helicobacter jaachi.	272	1677920	y
Lipoprotein	Bacteria	Proteobacteria	Epsilonproteobacteria	Campylobacterales	Helicobacteraceae	Helicobacter	Helicobacter magdeburgensis	A0A4U8SY60	Helicobacter magdeburgensis.	275	471858	y
Lipoprotein	Bacteria	Proteobacteria	Epsilonproteobacteria	Campylobacterales	Helicobacteraceae	Helicobacter	Helicobacter sp. MIT 03-1614	A0A4U8STI7	Helicobacter sp. MIT 03-1614.	268	1548147	y
ABC transporter substrate-binding protein	Bacteria	Proteobacteria	Epsilonproteobacteria	Campylobacterales	Helicobacteraceae	Helicobacter	Helicobacter sp. MIT 05-5294	A0A4U8SI27	Helicobacter sp. MIT 05-5294.	259	1548150
Lipoprotein	Bacteria	Proteobacteria	Epsilonproteobacteria	Campylobacterales	Helicobacteraceae	Helicobacter	Helicobacter sp. MIT 05-5293	A0A4U8S5A9	Helicobacter sp. MIT 05-5293.	277	1548149	y
Lipoprotein	Bacteria	Proteobacteria	Epsilonproteobacteria	Campylobacterales	Helicobacteraceae	Helicobacter	Helicobacter sp. MIT 05-5293	A0A4U8S564	Helicobacter sp. MIT 05-5293.	280	1548149	y
Lipoprotein	Bacteria	Proteobacteria	Epsilonproteobacteria	Campylobacterales	Helicobacteraceae	Helicobacter	Helicobacter pullorum	A0A3S4YFP1	Helicobacter pullorum.	271	35818	y
ABC transporter substrate-binding protein	Bacteria	Proteobacteria	Epsilonproteobacteria	Campylobacterales	Helicobacteraceae	Helicobacter	Helicobacter anseris	A0A3D8J781	Helicobacter anseris.	259	375926	y
ABC transporter substrate-binding protein	Bacteria	Proteobacteria	Epsilonproteobacteria	Campylobacterales	Helicobacteraceae	Helicobacter	Helicobacter aurati	A0A3D8J706	Helicobacter aurati.	257	137778
Methionine ABC transporter substrate-binding protein	Bacteria	Proteobacteria	Epsilonproteobacteria	Campylobacterales	Helicobacteraceae	Helicobacter	Helicobacter brantae	A0A3D8J4V2	Helicobacter brantae.	257	375927
ABC transporter substrate-binding protein	Bacteria	Proteobacteria	Epsilonproteobacteria	Campylobacterales	Helicobacteraceae	Helicobacter	Helicobacter cholecystus	A0A3D8IWJ1	Helicobacter cholecystus.	264	45498
Uncharacterized protein	Bacteria	Proteobacteria	Epsilonproteobacteria	Campylobacterales	Helicobacteraceae	Helicobacter	Helicobacter sp. MIT 17-337	A0A3D8IKG1	Helicobacter sp. MIT 17-337.	263	2040648
Lipoprotein	Bacteria	Proteobacteria	Epsilonproteobacteria	Campylobacterales	Helicobacteraceae	Helicobacter	Helicobacter ganmani	A0A3D8IBL9	Helicobacter ganmani.	279	60246	y
Lipoprotein	Bacteria	Proteobacteria	Epsilonproteobacteria	Campylobacterales	Helicobacteraceae	Helicobacter	Helicobacter sp. MIT 14-3879	A0A3D8IAV3	Helicobacter sp. MIT 14-3879.	267	2040649	y
ABC transporter substrate-binding protein	Bacteria	Proteobacteria	Epsilonproteobacteria	Campylobacterales	Helicobacteraceae	Helicobacter	Helicobacter sp. MIT 14-3879	A0A3D8IAB1	Helicobacter sp. MIT 14-3879.	260	2040649
Lipoprotein	Bacteria	Proteobacteria	Epsilonproteobacteria	Campylobacterales	Helicobacteraceae	Helicobacter	Helicobacter marmotae	A0A3D8I7N2	Helicobacter marmotae.	268	152490	y
Lipoprotein	Bacteria	Proteobacteria	Epsilonproteobacteria	Campylobacterales	Helicobacteraceae	Helicobacter	Helicobacter marmotae	A0A3D8I7L3	Helicobacter marmotae.	266	152490	y
ABC transporter substrate-binding protein	Bacteria	Proteobacteria	Epsilonproteobacteria	Campylobacterales	Helicobacteraceae	Helicobacter	Helicobacter sp. MIT 99-5507	A0A3D8I109	Helicobacter sp. MIT 99-5507.	259	152489
Lipoprotein	Bacteria	Proteobacteria	Epsilonproteobacteria	Campylobacterales	Helicobacteraceae	Helicobacter	Helicobacter sp. MIT 99-5507	A0A3D8HZW1	Helicobacter sp. MIT 99-5507.	275	152489	y
Lipoprotein	Bacteria	Proteobacteria	Epsilonproteobacteria	Campylobacterales	Helicobacteraceae	Helicobacter	Helicobacter sp. MIT 99-10781	A0A3D8HNR0	Helicobacter sp. MIT 99-10781.	276	1332285	y
ABC transporter substrate-binding protein	Bacteria	Proteobacteria	Epsilonproteobacteria	Campylobacterales	Helicobacteraceae	Helicobacter	Helicobacter muridarum	A0A377PRE9	Helicobacter muridarum.	257	216
ABC transporter substrate-binding protein	Bacteria	Proteobacteria	Epsilonproteobacteria	Campylobacterales	Helicobacteraceae	Helicobacter	Helicobacter canis	A0A377J5U7	Helicobacter canis.	261	29419
MetQ/NlpA family ABC transporter substrate-binding protein	Bacteria	Proteobacteria	Epsilonproteobacteria	Campylobacterales	Helicobacteraceae	Helicobacter	Helicobacter saguini	A0A347VSP3	Helicobacter saguini.	264	1548018
ABC transporter substrate-binding protein	Bacteria	Proteobacteria	Epsilonproteobacteria	Campylobacterales	Helicobacteraceae	Helicobacter	Helicobacter saguini	A0A347VNZ8	Helicobacter saguini.	258	1548018
Methionine ABC transporter substrate-binding protein	Bacteria	Proteobacteria	Epsilonproteobacteria	Campylobacterales	Helicobacteraceae	Helicobacter	Helicobacter sp. 15-1451	A0A329ZXE9	Helicobacter sp. 15-1451.	260	2004995
ABC transporter substrate-binding protein	Bacteria	Proteobacteria	Epsilonproteobacteria	Campylobacterales	Helicobacteraceae	Helicobacter	Helicobacter sp. 16-1353	A0A329ZJL6	Helicobacter sp. 16-1353.	261	2004996
Lipoprotein	Bacteria	Proteobacteria	Epsilonproteobacteria	Campylobacterales	Helicobacteraceae	Helicobacter	Helicobacter sp. 10-6591	A0A329ZID6	Helicobacter sp. 10-6591.	282	2004998	y
Lipoprotein	Bacteria	Proteobacteria	Epsilonproteobacteria	Campylobacterales	Helicobacteraceae	Helicobacter	Helicobacter sp. 10-6591	A0A329ZHY7	Helicobacter sp. 10-6591.	270	2004998	y
Lipoprotein	Bacteria	Proteobacteria	Epsilonproteobacteria	Campylobacterales	Helicobacteraceae	Helicobacter	Helicobacter sp. 16-1353	A0A329ZGE2	Helicobacter sp. 16-1353.	272	2004996	y
ABC transporter substrate-binding protein	Bacteria	Proteobacteria	Epsilonproteobacteria	Campylobacterales	Helicobacteraceae	Helicobacter	Helicobacter fennelliae	A0A2X3BGS4	Helicobacter fennelliae.	255	215
Lipoprotein	Bacteria	Proteobacteria	Epsilonproteobacteria	Campylobacterales	Helicobacteraceae	Helicobacter	Helicobacter fennelliae	A0A2X3B9T5	Helicobacter fennelliae.	267	215
Lipoprotein	Bacteria	Proteobacteria	Epsilonproteobacteria	Campylobacterales	Helicobacteraceae	Helicobacter	Helicobacter valdiviensis	A0A2W6NL90	Helicobacter valdiviensis.	271	1458358	y
Lipoprotein	Bacteria	Proteobacteria	Epsilonproteobacteria	Campylobacterales	Helicobacteraceae	Helicobacter	Helicobacter apodemus	A0A2U8FFV5	Helicobacter apodemus.	272	135569	y
Lipoprotein	Bacteria	Proteobacteria	Epsilonproteobacteria	Campylobacterales	Helicobacteraceae	Helicobacter	Helicobacter winghamensis	A0A2N3PI96	Helicobacter winghamensis.	280	157268	y
Lipoprotein	Bacteria	Proteobacteria	Epsilonproteobacteria	Campylobacterales	Helicobacteraceae	Helicobacter	Helicobacter sp. TUL	A0A2A2GV54	Helicobacter sp. TUL.	269	1848928	y
Lipoprotein	Bacteria	Proteobacteria	Epsilonproteobacteria	Campylobacterales	Helicobacteraceae	Helicobacter	Helicobacter sp. TUL	A0A2A2GUX6	Helicobacter sp. TUL.	267	1848928	y
ABC transporter substrate-binding protein	Bacteria	Proteobacteria	Epsilonproteobacteria	Campylobacterales	Helicobacteraceae	Helicobacter	Helicobacter sp. 13S00482-2	A0A268UBY1	Helicobacter sp. 13S00482-2.	256	1476200
Methionine ABC transporter substrate-binding protein	Bacteria	Proteobacteria	Epsilonproteobacteria	Campylobacterales	Helicobacteraceae	Helicobacter	Helicobacter sp. 13S00482-2	A0A268UBP6	Helicobacter sp. 13S00482-2.	259	1476200
Methionine ABC transporter substrate-binding protein	Bacteria	Proteobacteria	Epsilonproteobacteria	Campylobacterales	Helicobacteraceae	Helicobacter	Helicobacter sp. 13S00477-4	A0A268U5I5	Helicobacter sp. 13S00477-4.	254	1905759
Lipoprotein	Bacteria	Proteobacteria	Epsilonproteobacteria	Campylobacterales	Helicobacteraceae	Helicobacter	Helicobacter sp. 13S00477-4	A0A268U5B3	Helicobacter sp. 13S00477-4.	265	1905759
Lipoprotein	Bacteria	Proteobacteria	Epsilonproteobacteria	Campylobacterales	Helicobacteraceae	Helicobacter	Helicobacter sp. 13S00401-1	A0A268TU10	Helicobacter sp. 13S00401-1.	277	1905758	y
Methionine ABC transporter substrate-binding protein	Bacteria	Proteobacteria	Epsilonproteobacteria	Campylobacterales	Helicobacteraceae	Helicobacter	Helicobacter sp. 12S02232-10	A0A268TSH4	Helicobacter sp. 12S02232-10.	254	1476197
ABC transporter substrate-binding protein	Bacteria	Proteobacteria	Epsilonproteobacteria	Campylobacterales	Helicobacteraceae	Helicobacter	Helicobacter sp. 12S02232-10	A0A268TSF0	Helicobacter sp. 12S02232-10.	256	1476197
Methionine ABC transporter substrate-binding protein	Bacteria	Proteobacteria	Epsilonproteobacteria	Campylobacterales	Helicobacteraceae	Helicobacter	Helicobacter sp. 12S02634-8	A0A268TPJ2	Helicobacter sp. 12S02634-8.	254	1476199
ABC transporter substrate-binding protein	Bacteria	Proteobacteria	Epsilonproteobacteria	Campylobacterales	Helicobacteraceae	Helicobacter	Helicobacter sp. 12S02634-8	A0A268TPG3	Helicobacter sp. 12S02634-8.	256	1476199
Methionine ABC transporter substrate-binding protein	Bacteria	Proteobacteria	Epsilonproteobacteria	Campylobacterales	Helicobacteraceae	Helicobacter	Helicobacter sp. 11S03491-1	A0A268TGP7	Helicobacter sp. 11S03491-1.	256	1476196
ABC transporter substrate-binding protein	Bacteria	Proteobacteria	Epsilonproteobacteria	Campylobacterales	Helicobacteraceae	Helicobacter	Helicobacter sp. 11S03491-1	A0A268TGN8	Helicobacter sp. 11S03491-1.	259	1476196
ABC transporter substrate-binding protein	Bacteria	Proteobacteria	Epsilonproteobacteria	Campylobacterales	Helicobacteraceae	Helicobacter	Helicobacter sp. 11S02596-1	A0A268TDL5	Helicobacter sp. 11S02596-1.	256	1476194
Methionine ABC transporter substrate-binding protein	Bacteria	Proteobacteria	Epsilonproteobacteria	Campylobacterales	Helicobacteraceae	Helicobacter	Helicobacter sp. 11S02596-1	A0A268TDJ1	Helicobacter sp. 11S02596-1.	254	1476194
Lipoprotein	Bacteria	Proteobacteria	Epsilonproteobacteria	Campylobacterales	Helicobacteraceae	Helicobacter	Helicobacter sp. 11S02629-2	A0A268TBK7	Helicobacter sp. 11S02629-2.	276	1476195
Lipoprotein	Bacteria	Proteobacteria	Epsilonproteobacteria	Campylobacterales	Helicobacteraceae	Helicobacter	Helicobacter pylori	A0A1W0VPZ0	Helicobacter pylori	271	210
Methionine ABC transporter substrate-binding protein	Bacteria	Proteobacteria	Epsilonproteobacteria	Campylobacterales	Helicobacteraceae	Helicobacter	Helicobacter bilis	A0A1Q2LJD0	Helicobacter bilis.	261	37372
ABC transporter substrate-binding protein	Bacteria	Proteobacteria	Epsilonproteobacteria	Campylobacterales	Helicobacteraceae	Helicobacter	Helicobacter sp. CLO-3	A0A1B8J826	Helicobacter sp. CLO-3.	261	211
Lipoprotein	Bacteria	Proteobacteria	Epsilonproteobacteria	Campylobacterales	Helicobacteraceae	Helicobacter	Helicobacter sp. CLO-3	A0A1B8J821	Helicobacter sp. CLO-3.	277	211
Lipoprotein	Bacteria	Proteobacteria	Epsilonproteobacteria	Campylobacterales	Helicobacteraceae	Helicobacter	Helicobacter typhlonius	A0A099UFY0	Helicobacter typhlonius.	275	76936	y
Lipoprotein	Bacteria	Proteobacteria	Epsilonproteobacteria	Campylobacterales	Helicobacteraceae	Helicobacter	Helicobacter typhlonius	A0A099UC48	Helicobacter typhlonius.	279	76936	y
Lipoprotein	Bacteria	Proteobacteria	Epsilonproteobacteria	Campylobacterales	Helicobacteraceae	Helicobacter	Helicobacter sp. MIT 11-5569	A0A099TU37	Helicobacter sp. MIT 11-5569.	281	1548151	y
D-methionine ABC superfamily ATP binding cassette transporter| binding protein	Bacteria	Proteobacteria	Epsilonproteobacteria	Campylobacterales	Campylobacteraceae	Campylobacter	Campylobacter upsaliensis JV21	E6LAR1	Campylobacter upsaliensis JV21.	254	888826
D-methionine ABC superfamily ATP binding cassette transporter| binding protein	Bacteria	Proteobacteria	Epsilonproteobacteria	Campylobacterales	Campylobacteraceae	Campylobacter	Campylobacter upsaliensis JV21	E6LAQ9	Campylobacter upsaliensis JV21.	257	888826
Lipoprotein	Bacteria	Proteobacteria	Epsilonproteobacteria	Campylobacterales	Campylobacteraceae	Arcobacter group	Arcobacter nitrofigilis DSM 7299	D5V6W6	Arcobacter nitrofigilis (strain ATCC 33309 / DSM 7299 / LMG 7604 /NCTC 12251 / CI)	268	572480	y
Lipoprotein| NlpA family	Bacteria	Proteobacteria	Epsilonproteobacteria	Campylobacterales	Campylobacteraceae	Campylobacter	Campylobacter jejuni subsp. jejuni 414	D2MZ09	Campylobacter jejuni subsp. jejuni 414.	256	683083
Lipoprotein	Bacteria	Proteobacteria	Epsilonproteobacteria	Campylobacterales	Campylobacteraceae	Sulfurospirillum	Sulfurospirillum deleyianum DSM 6946	D1AZD0	Sulfurospirillum deleyianum (strain ATCC 51133 / DSM 6946 / 5175)	273	525898	y
NLPA lipoprotein	Bacteria	Proteobacteria	Epsilonproteobacteria	Campylobacterales	Campylobacteraceae	Campylobacter	Campylobacter gracilis RM3268	C8PGQ1	Campylobacter gracilis RM3268.	258	553220
NLPA lipoprotein	Bacteria	Proteobacteria	Epsilonproteobacteria	Campylobacterales	Campylobacteraceae	Campylobacter	Campylobacter showae RM3277	C6RFE4	Campylobacter showae RM3277.	259	553219
NLPA lipoprotein	Bacteria	Proteobacteria	Epsilonproteobacteria	Campylobacterales	Campylobacteraceae	Campylobacter	Campylobacter showae RM3277	C6RFE1	Campylobacter showae RM3277.	257	553219
DL-methionine ABC transporter MetINQ| substrate-binding protein	Bacteria	Proteobacteria	Epsilonproteobacteria	Campylobacterales	Campylobacteraceae	Campylobacter	Campylobacter concisus 13826	A7ZDH7	Campylobacter concisus (strain 13826)	259	360104
D-methionine-binding lipoprotein MetQ	Bacteria	Proteobacteria	Epsilonproteobacteria	Campylobacterales	Campylobacteraceae	Campylobacter	Campylobacter hominis ATCC BAA-381	A7I286	Campylobacter hominis (strain ATCC BAA-381 / LMG 19568 / NCTC 13146 /CH001A)	261	360107
DL-methionine ABC transporter MetINQ| substrate-binding protein	Bacteria	Proteobacteria	Epsilonproteobacteria	Campylobacterales	Campylobacteraceae	Campylobacter	Campylobacter curvus 525.92	A7GYE9	Campylobacter curvus (strain 525.92)	260	360105
DL-methionine ABC transporter MetINQ| substrate-binding protein	Bacteria	Proteobacteria	Epsilonproteobacteria	Campylobacterales	Campylobacteraceae	Campylobacter	Campylobacter curvus 525.92	A7GYE8	Campylobacter curvus (strain 525.92)	259	360105
Lipoprotein| nlpa family	Bacteria	Proteobacteria	Epsilonproteobacteria	Campylobacterales	Campylobacteraceae	Campylobacter	Campylobacter fetus subsp. fetus 82-40	A0RPK5	Campylobacter fetus subsp. fetus (strain 82-40)	257	360106
Lipoprotein	Bacteria	Proteobacteria	Epsilonproteobacteria	Campylobacterales	Campylobacteraceae	Arcobacter group	Arcobacter sp. CAU 1517	A0A5R8Y0K2	Arcobacter sp. CAU 1517.	273	2576037	y
ABC transporter substrate-binding protein	Bacteria	Proteobacteria	Epsilonproteobacteria	Campylobacterales	Campylobacteraceae	Campylobacter	Campylobacter sp. LR264d	A0A5M8IH53	Campylobacter sp. LR264d.	256	2593544
MetQ/NlpA family ABC transporter substrate-binding protein	Bacteria	Proteobacteria	Epsilonproteobacteria	Campylobacterales	Campylobacteraceae	Campylobacter	Campylobacter sp. LR264d	A0A5M8IEE5	Campylobacter sp. LR264d.	254	2593544
ABC transporter substrate-binding protein	Bacteria	Proteobacteria	Epsilonproteobacteria	Campylobacterales	Campylobacteraceae	Campylobacter	Campylobacter sp. LR264d	A0A5M8I549	Campylobacter sp. LR264d.	252	2593544
MetQ/NlpA family ABC transporter substrate-binding protein	Bacteria	Proteobacteria	Epsilonproteobacteria	Campylobacterales	Campylobacteraceae	Campylobacter	Campylobacter lari	A0A5L8NT91	Campylobacter lari.	256	201
MetQ/NlpA family ABC transporter substrate-binding protein	Bacteria	Proteobacteria	Epsilonproteobacteria	Campylobacterales	Campylobacteraceae	Campylobacter	Campylobacter lari	A0A5L8NSW9	Campylobacter lari.	257	201
MetQ/NlpA family ABC transporter substrate-binding protein	Bacteria	Proteobacteria	Epsilonproteobacteria	Campylobacterales	Campylobacteraceae	Campylobacter	Campylobacter upsaliensis	A0A5L4I5A2	Campylobacter upsaliensis.	256	28080
Lipoprotein| NlpA family	Bacteria	Proteobacteria	Epsilonproteobacteria	Campylobacterales	Campylobacteraceae	Campylobacter	Campylobacter volucris	A0A5C8KZN5	Campylobacter volucris.	256	1031542
MetQ/NlpA family ABC transporter substrate-binding protein	Bacteria	Proteobacteria	Epsilonproteobacteria	Campylobacterales	Campylobacteraceae	Campylobacter	Campylobacter lanienae	A0A562Y6F1	Campylobacter lanienae.	257	75658
Methionine ABC transporter substrate-binding protein	Bacteria	Proteobacteria	Epsilonproteobacteria	Campylobacterales	Campylobacteraceae	Campylobacter	Campylobacter coli	A0A508ZPF4	Campylobacter coli.	258	195
MetQ/NlpA family ABC transporter substrate-binding protein	Bacteria	Proteobacteria	Epsilonproteobacteria	Campylobacterales	Campylobacteraceae	Campylobacter	Campylobacter sp. US33a	A0A4Y8BMT3	Campylobacter sp. US33a.	256	2498120
MetQ/NlpA family ABC transporter substrate-binding protein	Bacteria	Proteobacteria	Epsilonproteobacteria	Campylobacterales	Campylobacteraceae	Campylobacter	Campylobacter sp. US33a	A0A4Y8BMJ3	Campylobacter sp. US33a.	255	2498120
Methionine ABC transporter substrate-binding protein	Bacteria	Proteobacteria	Epsilonproteobacteria	Campylobacterales	Campylobacteraceae	Campylobacter	Campylobacter sp. MIT 17-670	A0A4V6DXR7	Campylobacter sp. MIT 17-670.	257	2040645
Methionine ABC transporter substrate-binding protein	Bacteria	Proteobacteria	Epsilonproteobacteria	Campylobacterales	Campylobacteraceae	Campylobacter	Campylobacter sp. MIT 12-5580	A0A4V6DVN7	Campylobacter sp. MIT 12-5580.	258	2040651
Lipoprotein	Bacteria	Proteobacteria	Epsilonproteobacteria	Campylobacterales	Campylobacteraceae	Arcobacter group	Arcobacter anaerophilus	A0A4V1LQ11	Arcobacter anaerophilus.	274	877500	y
Methionine ABC transporter substrate-binding protein	Bacteria	Proteobacteria	Epsilonproteobacteria	Campylobacterales	Campylobacteraceae	Campylobacter	Campylobacter sp. MIT 17-664	A0A4U7BMR9	Campylobacter sp. MIT 17-664.	257	2040646
ABC transporter substrate-binding protein	Bacteria	Proteobacteria	Epsilonproteobacteria	Campylobacterales	Campylobacteraceae	Campylobacter	Campylobacter sp. MIT 12-5580	A0A4U7BFD9	Campylobacter sp. MIT 12-5580.	258	2040651
Methionine ABC transporter substrate-binding protein	Bacteria	Proteobacteria	Epsilonproteobacteria	Campylobacterales	Campylobacteraceae	Campylobacter	Campylobacter sp. MIT 12-5580	A0A4U7BCA8	Campylobacter sp. MIT 12-5580.	258	2040651
MetQ/NlpA family ABC transporter substrate-binding protein	Bacteria	Proteobacteria	Epsilonproteobacteria	Campylobacterales	Campylobacteraceae	Campylobacter	Campylobacter sp. B423b	A0A4Q9JVL3	Campylobacter sp. B423b.	256	2267891
Lipoprotein	Bacteria	Proteobacteria	Epsilonproteobacteria	Campylobacterales	Campylobacteraceae	Arcobacter group	Halarcobacter mediterraneus	A0A4Q1AUH9	Haloarcobacter mediterraneus.	272	2023153	y
Lipoprotein	Bacteria	Proteobacteria	Epsilonproteobacteria	Campylobacterales	Campylobacteraceae	Arcobacter group	Arcobacter sp. CECT 8986	A0A4Q1ACP4	Arcobacter sp. CECT 8986.	267	2044507	y
Lipoprotein	Bacteria	Proteobacteria	Epsilonproteobacteria	Campylobacterales	Campylobacteraceae	Arcobacter group	Arcobacter sp. CECT 8983	A0A4Q0ZY00	Arcobacter sp. CECT 8983.	268	2044508	y
Lipoprotein	Bacteria	Proteobacteria	Epsilonproteobacteria	Campylobacterales	Campylobacteraceae	Arcobacter group	Halarcobacter ebronensis	A0A4Q0Y5V3	Arcobacter ebronensis.	273	1462615	y
ABC transporter substrate-binding protein	Bacteria	Proteobacteria	Epsilonproteobacteria	Campylobacterales	Campylobacteraceae	Campylobacter	Campylobacter sp.	A0A496LK11	Campylobacter sp.	257	205
D-methionine transport system substrate-binding protein	Bacteria	Proteobacteria	Epsilonproteobacteria	Campylobacterales	Campylobacteraceae	Campylobacter	Campylobacter upsaliensis	A0A448KPE1	Campylobacter upsaliensis.	257	28080
Methionine ABC transporter substrate-binding protein	Bacteria	Proteobacteria	Epsilonproteobacteria	Campylobacterales	Campylobacteraceae	Campylobacter	Campylobacter upsaliensis	A0A448KPD7	Campylobacter upsaliensis.	257	28080
Lipoprotein	Bacteria	Proteobacteria	Epsilonproteobacteria	Campylobacterales	Campylobacteraceae	Arcobacter group	Arcobacter venerupis	A0A443TUY5	Arcobacter venerupis.	275	1054033	y
MetQ/NlpA family ABC transporter substrate-binding protein	Bacteria	Proteobacteria	Epsilonproteobacteria	Campylobacterales	Campylobacteraceae	Campylobacter	Campylobacter hepaticus	A0A424Z2I2	Campylobacter hepaticus.	256	1813019
MetQ/NlpA family ABC transporter substrate-binding protein	Bacteria	Proteobacteria	Epsilonproteobacteria	Campylobacterales	Campylobacteraceae	Campylobacter	Campylobacter hepaticus	A0A424Z2E6	Campylobacter hepaticus.	257	1813019
D-methionine transport system substrate-binding protein	Bacteria	Proteobacteria	Epsilonproteobacteria	Campylobacterales	Campylobacteraceae	Campylobacter	Campylobacter jejuni subsp. doylei	A0A3S4S3J7	Campylobacter jejuni subsp. doylei.	257	32021
D-methionine-binding lipoprotein MetQ	Bacteria	Proteobacteria	Epsilonproteobacteria	Campylobacterales	Campylobacteraceae	Campylobacter	Campylobacter sputorum biovar sputorum	A0A381DID1	Campylobacter sputorum biovar sputorum.	257	32024
NlpA family lipoprotein	Bacteria	Proteobacteria	Epsilonproteobacteria	Campylobacterales	Campylobacteraceae	Campylobacter	Campylobacter jejuni subsp. doylei	A0A381D3M1	Campylobacter jejuni subsp. doylei.	258	32021
Lipoprotein	Bacteria	Proteobacteria	Epsilonproteobacteria	Campylobacterales	Campylobacteraceae	Arcobacter group	Arcobacter mytili LMG 24559	A0A345J692	Arcobacter mytili LMG 24559.	267	1032238	y
Methionine ABC transporter substrate-binding protein	Bacteria	Proteobacteria	Epsilonproteobacteria	Campylobacterales	Campylobacteraceae	Campylobacter	Campylobacter blaseri	A0A2P8QYR3	Campylobacter blaseri.	257	2042961
Methionine ABC transporter substrate-binding protein	Bacteria	Proteobacteria	Epsilonproteobacteria	Campylobacterales	Campylobacteraceae	Arcobacter group	Arcobacter sp.	A0A2G6R460	Arcobacter sp.	263	1872629
Methionine ABC transporter substrate-binding protein	Bacteria	Proteobacteria	Epsilonproteobacteria	Campylobacterales	Campylobacteraceae	Campylobacter	Campylobacter sp. 73/13	A0A2G4R6K7	Campylobacter sp. 73/13.	254	1655501
Lipoprotein	Bacteria	Proteobacteria	Epsilonproteobacteria	Campylobacterales	Campylobacteraceae	Arcobacter group	Arcobacter sp.	A0A2D5P3K9	Arcobacter sp.	275	1872629	y
DL-methionine ABC transporter MetINQ| substrate-binding protein	Bacteria	Proteobacteria	Epsilonproteobacteria	Campylobacterales	Campylobacteraceae	Campylobacter	Campylobacter avium LMG 24591	A0A222MYM9	Campylobacter avium LMG 24591.	259	522484
DL-methionine ABC transporter MetINQ| substrate-binding protein	Bacteria	Proteobacteria	Epsilonproteobacteria	Campylobacterales	Campylobacteraceae	Campylobacter	Campylobacter avium LMG 24591	A0A222MY85	Campylobacter avium LMG 24591.	253	522484	y
Inner membrane lipoprotein NlpA	Bacteria	Proteobacteria	Epsilonproteobacteria	Campylobacterales	Campylobacteraceae	Campylobacter	Campylobacter avium LMG 24591	A0A222MY66	Campylobacter avium LMG 24591.	252	522484
DL-methionine ABC transporter MetINQ| substrate-binding protein	Bacteria	Proteobacteria	Epsilonproteobacteria	Campylobacterales	Campylobacteraceae	Campylobacter	Campylobacter avium LMG 24591	A0A222MXF1	Campylobacter avium LMG 24591.	254	522484
D-methionine-binding lipoprotein MetQ	Bacteria	Proteobacteria	Epsilonproteobacteria	Campylobacterales	Campylobacteraceae	Sulfurospirillum	Sulfurospirillum sp. SL2-1	A0A1Y0HHT3	Sulfurospirillum sp. SL2-1.	276	1986224
DL-methionine ABC transporter MetINQ| substrate-binding protein	Bacteria	Proteobacteria	Epsilonproteobacteria	Campylobacterales	Campylobacteraceae	Campylobacter	Campylobacter sp. RM6137	A0A1X9SY05	Campylobacter sp. RM6137.	257	1660073
DL-methionine ABC transporter MetINQ| substrate-binding protein	Bacteria	Proteobacteria	Epsilonproteobacteria	Campylobacterales	Campylobacteraceae	Campylobacter	Campylobacter cuniculorum DSM 23162 = LMG 24588	A0A1W6BWR7	Campylobacter cuniculorum DSM 23162 = LMG 24588.	260	1121267
DL-methionine ABC transporter MetINQ| substrate-binding protein	Bacteria	Proteobacteria	Epsilonproteobacteria	Campylobacterales	Campylobacteraceae	Campylobacter	Campylobacter cuniculorum DSM 23162 = LMG 24588	A0A1W6BWQ2	Campylobacter cuniculorum DSM 23162 = LMG 24588.	257	1121267
DL-methionine ABC transporter MetINQ| substrate-binding protein	Bacteria	Proteobacteria	Epsilonproteobacteria	Campylobacterales	Campylobacteraceae	Campylobacter	Campylobacter cuniculorum DSM 23162 = LMG 24588	A0A1W6BWM4	Campylobacter cuniculorum DSM 23162 = LMG 24588.	257	1121267
DL-methionine ABC transporter MetINQ| substrate-binding protein	Bacteria	Proteobacteria	Epsilonproteobacteria	Campylobacterales	Campylobacteraceae	Campylobacter	Campylobacter pinnipediorum subsp. caledonicus	A0A1S6U796	Campylobacter pinnipediorum subsp. caledonicus.	257	1874362
MetQ/NlpA family ABC transporter substrate-binding protein	Bacteria	Proteobacteria	Epsilonproteobacteria	Campylobacterales	Campylobacteraceae	Campylobacter	Campylobacter jejuni	A0A1D9BKI2	Campylobacter jejuni.	256	197
MUT family transporter| periplasmic binding protein	Bacteria	Proteobacteria	Epsilonproteobacteria	Campylobacterales	Campylobacteraceae	Sulfurospirillum	Sulfurospirillum halorespirans DSM 13726	A0A1D7TMX2	Sulfurospirillum halorespirans DSM 13726.	271	1193502	y
DL-methionine ABC transporter MetINQ| substrate-binding protein	Bacteria	Proteobacteria	Epsilonproteobacteria	Campylobacterales	Campylobacteraceae	Campylobacter	Campylobacter hyointestinalis subsp. lawsonii CCUG	A0A172SVV9	Campylobacter hyointestinalis subsp. lawsonii CCUG 27631.	257	1031752
D-methionine-binding lipoprotein MetQ	Bacteria	Proteobacteria	Epsilonproteobacteria	Campylobacterales	Campylobacteraceae	Campylobacter	Campylobacter geochelonis	A0A128EGY7	Campylobacter geochelonis.	256	1780362
D-methionine-binding lipoprotein MetQ	Bacteria	Proteobacteria	Epsilonproteobacteria	Campylobacterales	Campylobacteraceae	Campylobacter	Campylobacter geochelonis	A0A128EGU2	Campylobacter geochelonis.	256	1780362
DL-methionine ABC transporter MetINQ| substrate-binding protein	Bacteria	Proteobacteria	Epsilonproteobacteria	Campylobacterales	Campylobacteraceae	Campylobacter	Campylobacter coli	A0A0Q2R4L8	Campylobacter coli.	256	195
DL-methionine ABC transporter MetINQ| substrate-binding protein	Bacteria	Proteobacteria	Epsilonproteobacteria	Campylobacterales	Campylobacteraceae	Campylobacter	Campylobacter ureolyticus RIGS 9880	A0A0K1HEW8	Campylobacter ureolyticus RIGS 9880.	257	1032069
DL-methionine ABC transporter MetINQ| substrate-binding protein	Bacteria	Proteobacteria	Epsilonproteobacteria	Campylobacterales	Campylobacteraceae	Campylobacter	Campylobacter insulaenigrae NCTC 12927	A0A0A8H109	Campylobacter insulaenigrae NCTC 12927.	256	1031564
DL-methionine ABC transporter MetINQ| substrate-binding protein	Bacteria	Proteobacteria	Epsilonproteobacteria	Campylobacterales	Campylobacteraceae	Campylobacter	Campylobacter sp. RM16704	A0A0A8GW60	Campylobacter sp. RM16704.	256	1500960
Lipoprotein	Bacteria	Proteobacteria	Epsilonproteobacteria	Campylobacterales	Campylobacteraceae	Sulfurospirillum	Sulfurospirillum sp. SCADC	A0A087MCY2	Sulfurospirillum sp. SCADC.	273	1537915	y
DL-methionine ABC transporter MetINQ| substrate-binding protein	Bacteria	Proteobacteria	Epsilonproteobacteria	Campylobacterales	Campylobacteraceae	Campylobacter	Campylobacter iguaniorum	A0A076FGE8	Campylobacter iguaniorum.	257	1244531
D-methionine-binding lipoprotein MetQ	Bacteria	Proteobacteria	Gammaproteobacteria	Enterobacterales	Yersiniaceae	Yersinia	Yersinia pestis	Q8ZH40	Yersinia pestis.	271	632	y
Lipoprotein	Bacteria	Proteobacteria	Gammaproteobacteria	Enterobacterales	Yersiniaceae	Serratia	Serratia sp. M24T3	I0QP63	Serratia sp. M24T3.	271	932213	y
Lipoprotein	Bacteria	Proteobacteria	Gammaproteobacteria	Enterobacterales	Yersiniaceae	Rahnella	Rahnella aquatilis CIP 78.65 = ATCC 33071	H2ISE5	Rahnella aquatilis (strain ATCC 33071 / DSM 4594 / JCM 1683 / NBRC 105701 /NCIMB 13365 / CIP 78.65)	280	745277
Lipoprotein	Bacteria	Proteobacteria	Gammaproteobacteria	Enterobacterales	Yersiniaceae	Serratia	Serratia odorifera DSM 4582	D4E9B5	Serratia odorifera DSM 4582.	270	667129	y
Lipoprotein	Bacteria	Proteobacteria	Gammaproteobacteria	Enterobacterales	Yersiniaceae	Ewingella	Ewingella americana	A0A502GB11	Ewingella americana.	281	41202
Lipoprotein	Bacteria	Proteobacteria	Gammaproteobacteria	Enterobacterales	Yersiniaceae	Serratia	Serratia rubidaea	A0A4U9HBU7	Serratia rubidaea	270	61652	y
Metal ABC transporter substrate-binding protein	Bacteria	Proteobacteria	Gammaproteobacteria	Enterobacterales	Yersiniaceae	Nissabacter	Nissabacter sp. SGAir0207	A0A4P8SMG6	Nissabacter sp. SGAir0207.	291	2126321
Methionine ABC transporter substrate-binding protein	Bacteria	Proteobacteria	Gammaproteobacteria	Enterobacterales	Yersiniaceae	Nissabacter	Nissabacter sp. SGAir0207	A0A4P8SI75	Nissabacter sp. SGAir0207.	274	2126321
Lipoprotein	Bacteria	Proteobacteria	Gammaproteobacteria	Enterobacterales	Yersiniaceae	Serratia	Serratia fonticola	A0A448SGJ9	Serratia fonticola.	270	47917	y
Lipoprotein	Bacteria	Proteobacteria	Gammaproteobacteria	Enterobacterales	Yersiniaceae	Serratia	Serratia rubidaea	A0A447QUV8	Serratia rubidaea	266	61652	y
Lipoprotein	Bacteria	Proteobacteria	Gammaproteobacteria	Enterobacterales	Yersiniaceae	Serratia	Serratia quinivorans	A0A2X2G7H0	Serratia quinivorans.	271	137545	y
Lipoprotein	Bacteria	Proteobacteria	Gammaproteobacteria	Enterobacterales	Yersiniaceae	Candidatus Fukatsuia	Candidatus Fukatsuia symbiotica	A0A2U8I2X5	Candidatus Fukatsuia symbiotica.	271	1878942	y
Methionine ABC transporter substrate-binding protein	Bacteria	Proteobacteria	Gammaproteobacteria	Enterobacterales	Yersiniaceae	Chimaeribacter	Chimaeribacter arupi	A0A2N5EHK4	Yersiniaceae bacterium 2016Iso3.	262	2060066
Metal ABC transporter substrate-binding protein	Bacteria	Proteobacteria	Gammaproteobacteria	Enterobacterales	Yersiniaceae	Chimaeribacter	Chimaeribacter californicus	A0A2N5EBZ4	Yersiniaceae bacterium 2015Iso6.	291	2060067
Lipoprotein	Bacteria	Proteobacteria	Gammaproteobacteria	Enterobacterales	Yersiniaceae	Rahnella	Rahnella sp. ERMR1:05	A0A2L1UYD1	Rahnella sp. ERMR1:05.	270	1805933	y
D-methionine-binding lipoprotein metQ	Bacteria	Proteobacteria	Gammaproteobacteria	Enterobacterales	Yersiniaceae	Serratia	Serratia ficaria	A0A240C8B7	Serratia ficaria.	291	61651
Lipoprotein	Bacteria	Proteobacteria	Gammaproteobacteria	Enterobacterales	Yersiniaceae	Serratia	Serratia ficaria	A0A240C7K4	Serratia ficaria.	266	61651	y
D-methionine-binding lipoprotein metQ	Bacteria	Proteobacteria	Gammaproteobacteria	Enterobacterales	Yersiniaceae	Serratia	Serratia ficaria	A0A240C0V0	Serratia ficaria.	266	61651
Lipoprotein	Bacteria	Proteobacteria	Gammaproteobacteria	Enterobacterales	Yersiniaceae	Serratia	Serratia ficaria	A0A240BP43	Serratia ficaria.	270	61651	y
Methionine-binding protein	Bacteria	Proteobacteria	Gammaproteobacteria	Enterobacterales	Yersiniaceae	Rouxiella	Rouxiella badensis	A0A1X0WIM4	Rouxiella badensis.	271	1646377
Lipoprotein	Bacteria	Proteobacteria	Gammaproteobacteria	Enterobacterales	Yersiniaceae	Rouxiella	Rouxiella badensis	A0A1X0WHP2	Rouxiella badensis.	275	1646377
Metal ABC transporter substrate-binding protein	Bacteria	Proteobacteria	Gammaproteobacteria	Enterobacterales	Yersiniaceae	Rouxiella	Rouxiella badensis	A0A1X0WHN6	Rouxiella badensis.	291	1646377
Lipoprotein	Bacteria	Proteobacteria	Gammaproteobacteria	Enterobacterales	Yersiniaceae	Rouxiella	Rouxiella badensis	A0A1X0WH72	Rouxiella badensis.	280	1646377
Lipoprotein	Bacteria	Proteobacteria	Gammaproteobacteria	Enterobacterales	Yersiniaceae	Rouxiella	Rouxiella badensis	A0A1X0WFB4	Rouxiella badensis.	266	1646377	y
Lipoprotein	Bacteria	Proteobacteria	Gammaproteobacteria	Enterobacterales	Yersiniaceae	Rouxiella	Rouxiella silvae	A0A1X0W8Q3	Rouxiella silvae.	280	1646373
Lipoprotein	Bacteria	Proteobacteria	Gammaproteobacteria	Enterobacterales	Yersiniaceae	Rouxiella	Rouxiella silvae	A0A1X0W202	Rouxiella silvae.	265	1646373
Metal ABC transporter substrate-binding protein	Bacteria	Proteobacteria	Gammaproteobacteria	Enterobacterales	Yersiniaceae	Rouxiella	Rouxiella silvae	A0A1X0W1D0	Rouxiella silvae.	291	1646373
Methionine-binding protein	Bacteria	Proteobacteria	Gammaproteobacteria	Enterobacterales	Yersiniaceae	Rouxiella	Rouxiella silvae	A0A1X0VX07	Rouxiella silvae.	271	1646373
Lipoprotein	Bacteria	Proteobacteria	Gammaproteobacteria	Enterobacterales	Yersiniaceae	Serratia	Serratia fonticola	A0A1Q5VL01	Serratia fonticola.	270	47917	y
Lipoprotein	Bacteria	Proteobacteria	Gammaproteobacteria	Enterobacterales	Yersiniaceae	Serratia	Serratia sp. YD25	A0A1B3FAU6	Serratia sp. YD25.	271	1759437	y
Lipoprotein	Bacteria	Proteobacteria	Gammaproteobacteria	Enterobacterales	Yersiniaceae	Serratia	Serratia plymuthica PRI-2C	A0A1B1KRL5	Serratia plymuthica PRI-2C.	270	1154756
D-methionine-binding lipoprotein MetQ	Bacteria	Proteobacteria	Gammaproteobacteria	Enterobacterales	Yersiniaceae	Serratia	Serratia plymuthica PRI-2C	A0A1B1KRG6	Serratia plymuthica PRI-2C.	270	1154756
Lipoprotein	Bacteria	Proteobacteria	Gammaproteobacteria	Enterobacterales	Yersiniaceae	Serratia	Serratia plymuthica PRI-2C	A0A1B1KPS4	Serratia plymuthica PRI-2C.	271	1154756	y
Lipoprotein	Bacteria	Proteobacteria	Gammaproteobacteria	Enterobacterales	Yersiniaceae	Serratia	Serratia plymuthica PRI-2C	A0A1B1KN51	Serratia plymuthica PRI-2C.	273	1154756
Lipoprotein	Bacteria	Proteobacteria	Gammaproteobacteria	Enterobacterales	Yersiniaceae	Yersinia	Yersinia rohdei	A0A0U1HN05	Yersinia rohdei.	280	29485
Methionine ABC transporter substrate-binding protein	Bacteria	Proteobacteria	Gammaproteobacteria	Enterobacterales	Yersiniaceae	Yersinia	Yersinia enterocolitica	A0A0T9U0A4	Yersinia enterocolitica.	270	630
Lipoprotein	Bacteria	Proteobacteria	Gammaproteobacteria	Enterobacterales	Yersiniaceae	Yersinia	Yersinia similis	A0A0T9P1P0	Yersinia similis.	274	367190
Lipoprotein	Bacteria	Proteobacteria	Gammaproteobacteria	Enterobacterales	Yersiniaceae	Yersinia	Yersinia nurmii	A0A0T9LF56	Yersinia nurmii.	271	685706	y
Lipoprotein	Bacteria	Proteobacteria	Gammaproteobacteria	Enterobacterales	Yersiniaceae	Yersinia	Yersinia nurmii	A0A0T9KPK0	Yersinia nurmii.	271	685706	y
Lipoprotein	Bacteria	Proteobacteria	Gammaproteobacteria	Enterobacterales	Yersiniaceae	Yersinia	Yersinia nurmii	A0A0T9KE90	Yersinia nurmii.	276	685706
Lipoprotein	Bacteria	Proteobacteria	Gammaproteobacteria	Enterobacterales	Yersiniaceae	Serratia	Serratia sp. Leaf51	A0A0Q4N7N4	Serratia sp. Leaf51.	279	1736224
Lipoprotein	Bacteria	Proteobacteria	Gammaproteobacteria	Enterobacterales	Yersiniaceae	Yersinia	Yersinia enterocolitica	A0A0F6WYT9	Yersinia enterocolitica.	274	630
Methionine ABC transporter substrate-binding protein	Bacteria	Proteobacteria	Gammaproteobacteria	Enterobacterales	Yersiniaceae	Yersinia	Yersinia enterocolitica	A0A0E1NB73	Yersinia enterocolitica.	269	630
Substrate-binding component of an ABC superfamily methionine transporter	Bacteria	Proteobacteria	Gammaproteobacteria	Enterobacterales	Yersiniaceae	Ewingella	Ewingella americana ATCC 33852	A0A085GMD8	Ewingella americana ATCC 33852.	291	910964
Lipoprotein	Bacteria	Proteobacteria	Gammaproteobacteria	Enterobacterales	Yersiniaceae	Ewingella	Ewingella americana ATCC 33852	A0A085GDW0	Ewingella americana ATCC 33852.	271	910964
Methionine ABC transporter substrate-binding protein	Bacteria	Proteobacteria	Gammaproteobacteria	Xanthomonadales	Xanthomonadaceae	Xylella	Xylella taiwanensis	Z9JNL6	Xylella taiwanensis.	261	1444770	y
Lipoprotein	Bacteria	Proteobacteria	Gammaproteobacteria	Xanthomonadales	Xanthomonadaceae	Xanthomonas	Xanthomonas oryzae pv. oryzae KACC 10331	Q5H501	Xanthomonas oryzae pv. oryzae (strain KACC10331 / KXO85)	266	291331	y
MetQ protein	Bacteria	Proteobacteria	Gammaproteobacteria	Xanthomonadales	Xanthomonadaceae	Stenotrophomonas	Stenotrophomonas maltophilia SKK35	M5CQP9	Stenotrophomonas maltophilia SKK35.	264	1118156	y
Lipoprotein	Bacteria	Proteobacteria	Gammaproteobacteria	Xanthomonadales	Xanthomonadaceae	Pseudoxanthomonas	Pseudoxanthomonas suwonensis 11-1	E6WPZ0	Pseudoxanthomonas suwonensis (strain 11-1)	266	743721	y
Lipoprotein	Bacteria	Proteobacteria	Gammaproteobacteria	Xanthomonadales	Xanthomonadaceae	Xanthomonas	Xanthomonas albilineans GPE PC73	D2UG85	Xanthomonas albilineans (strain GPE PC73 / CFBP 7063)	268	380358	y
Lipoprotein	Bacteria	Proteobacteria	Gammaproteobacteria	Xanthomonadales	Xanthomonadaceae	Luteimonas	Luteimonas terrae	A0A4R5U8K3	Luteimonas terrae.	267	1530191	y
Lipoprotein	Bacteria	Proteobacteria	Gammaproteobacteria	Xanthomonadales	Xanthomonadaceae	Pseudoxanthomonas	Pseudoxanthomonas sp. NML140781	A0A4Q8LSY3	Pseudoxanthomonas sp. NML140781.	268	2480812	y
Lipoprotein	Bacteria	Proteobacteria	Gammaproteobacteria	Xanthomonadales	Xanthomonadaceae	Pseudoxanthomonas	Pseudoxanthomonas composti	A0A4Q1JYV1	Pseudoxanthomonas composti.	269	2137479	y
ABC transporter substrate-binding protein	Bacteria	Proteobacteria	Gammaproteobacteria	Xanthomonadales	Xanthomonadaceae	Pseudolysobacter	Pseudolysobacter antarcticus	A0A411HNW3	Xanthomonadaceae bacterium AQ6-296.	257	2511995
Lipoprotein	Bacteria	Proteobacteria	Gammaproteobacteria	Xanthomonadales	Xanthomonadaceae	unclassified Xanthomonadaceae	Xanthomonadaceae bacterium	A0A3C0JEG5	Xanthomonadaceae bacterium.	266	1926873	y
Lipoprotein	Bacteria	Proteobacteria	Gammaproteobacteria	Xanthomonadales	Xanthomonadaceae	unclassified Xanthomonadaceae	Xanthomonadaceae bacterium	A0A354YAA5	Xanthomonadaceae bacterium.	266	1926873	y
Lipoprotein	Bacteria	Proteobacteria	Gammaproteobacteria	Xanthomonadales	Xanthomonadaceae	unclassified Xanthomonadaceae	Xanthomonadaceae bacterium NML93-0792	A0A2A3VHX2	Xanthomonadaceae bacterium NML93-0792.	267	2032566	y
Lipoprotein	Bacteria	Proteobacteria	Gammaproteobacteria	Xanthomonadales	Xanthomonadaceae	Stenotrophomonas	uncultured Stenotrophomonas sp.	A0A1Y5Q9A9	uncultured Stenotrophomonas sp.	266	165438	y
D-methionine transport system substrate-binding protein	Bacteria	Proteobacteria	Gammaproteobacteria	Xanthomonadales	Xanthomonadaceae	Pseudoxanthomonas	Pseudoxanthomonas indica	A0A1T5LP00	Pseudoxanthomonas indica.	264	428993	y
Lipoprotein	Bacteria	Proteobacteria	Gammaproteobacteria	Xanthomonadales	Xanthomonadaceae	Xanthomonas	Xanthomonas translucens pv. translucens DSM 18974	A0A1C3TSQ2	Xanthomonas translucens pv. translucens DSM 18974.	268	1261556	y
Methionine ABC transporter substrate-binding protein	Bacteria	Proteobacteria	Gammaproteobacteria	Xanthomonadales	Xanthomonadaceae	Stenotrophomonas	Stenotrophomonas rhizophila	A0A1B2N8B4	Stenotrophomonas rhizophila.	264	216778	y
Methionine ABC transporter substrate-binding protein	Bacteria	Proteobacteria	Gammaproteobacteria	Xanthomonadales	Xanthomonadaceae	Stenotrophomonas	Stenotrophomonas sp. KCTC 12332	A0A126NHK7	Stenotrophomonas sp. KCTC 12332.	264	1793721	y
NLPA lipofamily protein	Bacteria	Proteobacteria	Gammaproteobacteria	Xanthomonadales	Xanthomonadaceae	Lysobacter	Lysobacter antibioticus	A0A0S2DZ35	Lysobacter antibioticus.	264	84531	y
Methionine ABC transporter substrate-binding protein	Bacteria	Proteobacteria	Gammaproteobacteria	Xanthomonadales	Xanthomonadaceae	Stenotrophomonas	Stenotrophomonas chelatiphaga	A0A0R0CWX7	Stenotrophomonas chelatiphaga.	263	517011	y
Methionine ABC transporter substrate-binding protein	Bacteria	Proteobacteria	Gammaproteobacteria	Xanthomonadales	Xanthomonadaceae	Stenotrophomonas	Stenotrophomonas koreensis	A0A0R0BSU3	Stenotrophomonas koreensis.	264	266128	y
Lipoprotein	Bacteria	Proteobacteria	Gammaproteobacteria	Xanthomonadales	Xanthomonadaceae	Stenotrophomonas	Stenotrophomonas panacihumi	A0A0R0AP70	Stenotrophomonas panacihumi.	267	676599	y
Methionine ABC transporter substrate-binding protein	Bacteria	Proteobacteria	Gammaproteobacteria	Xanthomonadales	Xanthomonadaceae	Lysobacter	Lysobacter sp. Root96	A0A0Q9ESX6	Lysobacter sp. Root96.	262	1736612	y
Methionine ABC transporter substrate-binding protein	Bacteria	Proteobacteria	Gammaproteobacteria	Xanthomonadales	Xanthomonadaceae	Lysobacter	Lysobacter sp. Root690	A0A0Q8JLS3	Lysobacter sp. Root690.	263	1736588	y
Lipoprotein	Bacteria	Proteobacteria	Gammaproteobacteria	Xanthomonadales	Xanthomonadaceae	Luteimonas	Luteimonas sp. FCS-9	A0A0H1ANJ3	Luteimonas sp. FCS-9.	270	1547516	y
Lipoprotein	Bacteria	Proteobacteria	Gammaproteobacteria	Xanthomonadales	Xanthomonadaceae	Arenimonas	Arenimonas oryziterrae DSM 21050 = YC6267	A0A091BAA7	Arenimonas oryziterrae DSM 21050 = YC6267.	267	1121015	y
Lipoprotein	Bacteria	Proteobacteria	Gammaproteobacteria	Xanthomonadales	Xanthomonadaceae	Xylella	Xylella fastidiosa subsp. sandyi Ann-1	A0A060H588	Xylella fastidiosa subsp. sandyi Ann-1.	284	155920	y
Lipoprotein	Bacteria	Proteobacteria	Gammaproteobacteria	Vibrionales	Vibrionaceae	Vibrio	Vibrio ezurae NBRC 102218	U3B6L6	Vibrio ezurae NBRC 102218.	269	1219080	y
Lipoprotein	Bacteria	Proteobacteria	Gammaproteobacteria	Vibrionales	Vibrionaceae	Vibrio	Vibrio ezurae NBRC 102218	U3B5Y4	Vibrio ezurae NBRC 102218.	267	1219080	y
Lipoprotein	Bacteria	Proteobacteria	Gammaproteobacteria	Vibrionales	Vibrionaceae	Vibrio	Vibrio azureus NBRC 104587	U3A600	Vibrio azureus NBRC 104587.	269	1219077	y
Lipoprotein	Bacteria	Proteobacteria	Gammaproteobacteria	Vibrionales	Vibrionaceae	Vibrio	Vibrio fluvialis PG41	S7JKN3	Vibrio fluvialis PG41.	267	1336752	y
Lipoprotein	Bacteria	Proteobacteria	Gammaproteobacteria	Vibrionales	Vibrionaceae	Vibrio	Vibrio parahaemolyticus O1:Kuk str. FDA_R31	S5IYZ7	Vibrio parahaemolyticus O1:Kuk str. FDA_R31.	267	1338034	y
Probable D-methionine-binding lipoprotein MetQ	Bacteria	Proteobacteria	Gammaproteobacteria	Vibrionales	Vibrionaceae	Vibrio	Vibrio cholerae O1 biovar El Tor str. N16961	Q9KTJ7	Vibrio cholerae serotype O1 (strain ATCC 39315 / El Tor Inaba N16961)	269	243277	y
Lipoprotein	Bacteria	Proteobacteria	Gammaproteobacteria	Vibrionales	Vibrionaceae	Photobacterium	Photobacterium profundum SS9	Q6LN50	Photobacterium profundum (strain SS9)	271	298386	y
Lipoprotein	Bacteria	Proteobacteria	Gammaproteobacteria	Vibrionales	Vibrionaceae	Aliivibrio	Aliivibrio fischeri ES114	Q5E717	Aliivibrio fischeri (strain ATCC 700601 / ES114)	269	312309	y
Lipoprotein	Bacteria	Proteobacteria	Gammaproteobacteria	Vibrionales	Vibrionaceae	Vibrio	Vibrio tubiashii ATCC 19109	F9T5N8	Vibrio tubiashii ATCC 19109.	269	1051646	y
Lipoprotein	Bacteria	Proteobacteria	Gammaproteobacteria	Vibrionales	Vibrionaceae	Vibrio	Vibrio sp. N418	F9RGQ3	Vibrio sp. (strain N418)	269	701176	y
Lipoprotein	Bacteria	Proteobacteria	Gammaproteobacteria	Vibrionales	Vibrionaceae	Vibrio	Vibrio caribbeanicus ATCC BAA-2122	E3BIJ2	Vibrio caribbeanicus ATCC BAA-2122.	269	796620	y
Lipoprotein	Bacteria	Proteobacteria	Gammaproteobacteria	Vibrionales	Vibrionaceae	Grimontia	Grimontia hollisae CIP 101886	D0I7D9	Grimontia hollisae CIP 101886.	270	675812	y
Methionine ABC transporter substrate-binding protein	Bacteria	Proteobacteria	Gammaproteobacteria	Vibrionales	Vibrionaceae	Vibrio	Vibrio metschnikovii CIP 69.14	C9P675	Vibrio metschnikovii CIP 69.14.	264	675813	y
Lipoprotein	Bacteria	Proteobacteria	Gammaproteobacteria	Vibrionales	Vibrionaceae	Vibrio	Vibrio comitans NBRC 102076	A0A4Y3IPK9	Vibrio comitans NBRC 102076.	267	1219078	y
Lipoprotein	Bacteria	Proteobacteria	Gammaproteobacteria	Vibrionales	Vibrionaceae	Vibrio	Vibrio inusitatus NBRC 102082	A0A4Y3HVU7	Vibrio inusitatus NBRC 102082.	269	1219070	y
Lipoprotein	Bacteria	Proteobacteria	Gammaproteobacteria	Vibrionales	Vibrionaceae	Vibrio	Vibrio kanaloae	A0A4V5R416	Vibrio kanaloae.	267	170673	y
Lipoprotein	Bacteria	Proteobacteria	Gammaproteobacteria	Vibrionales	Vibrionaceae	Vibrio	Vibrio penaeicida	A0A3S0PZB4	Vibrio penaeicida.	269	104609	y
Lipoprotein	Bacteria	Proteobacteria	Gammaproteobacteria	Vibrionales	Vibrionaceae	Vibrio	Vibrio pectenicida	A0A3R9EHT3	Vibrio pectenicida.	269	62763	y
MetQ/NlpA family ABC transporter substrate-binding protein	Bacteria	Proteobacteria	Gammaproteobacteria	Vibrionales	Vibrionaceae	Vibrio	Vibrio viridaestus	A0A3N9TJ52	Vibrio sp. LJC006.	267	2487322	y
MetQ/NlpA family lipoprotein	Bacteria	Proteobacteria	Gammaproteobacteria	Vibrionales	Vibrionaceae	Vibrio	Vibrio viridaestus	A0A3N9TE15	Vibrio sp. LJC006.	269	2487322	y
Lipoprotein	Bacteria	Proteobacteria	Gammaproteobacteria	Vibrionales	Vibrionaceae	Vibrio	Vibrio sp.	A0A3D1Z5K2	Vibrio sp.	265	678
Lipoprotein	Bacteria	Proteobacteria	Gammaproteobacteria	Vibrionales	Vibrionaceae	Vibrio	Vibrio sp.	A0A3D1Z213	Vibrio sp.	269	678	y
Lipoprotein	Bacteria	Proteobacteria	Gammaproteobacteria	Vibrionales	Vibrionaceae	Vibrio	Vibrio sinensis	A0A3A6R5N0	Vibrio sp. BEI233.	269	2302434	y
Lipoprotein	Bacteria	Proteobacteria	Gammaproteobacteria	Vibrionales	Vibrionaceae	Vibrio	Vibrio sp. PID23_8	A0A3A2ICE5	Vibrio sp. PID23_8.	269	1583767	y
Lipoprotein	Bacteria	Proteobacteria	Gammaproteobacteria	Vibrionales	Vibrionaceae	Vibrio	Vibrio sp.	A0A349FCE2	Vibrio sp.	267	678	y
Lipoprotein	Bacteria	Proteobacteria	Gammaproteobacteria	Vibrionales	Vibrionaceae	Vibrio	Vibrio sp.	A0A349FC48	Vibrio sp.	269	678	y
Lipoprotein	Bacteria	Proteobacteria	Gammaproteobacteria	Vibrionales	Vibrionaceae	Vibrio	Vibrio alfacsensis	A0A347US78	Vibrio alfacsensis.	269	1074311	y
Lipoprotein	Bacteria	Proteobacteria	Gammaproteobacteria	Vibrionales	Vibrionaceae	Vibrio	Vibrio sp. 11986-1-5	A0A317ZST0	Vibrio sp. 11986-1-5.	267	2211215	y
Lipoprotein	Bacteria	Proteobacteria	Gammaproteobacteria	Vibrionales	Vibrionaceae	Photobacterium	Photobacterium rosenbergii	A0A2T3N715	Photobacterium rosenbergii.	267	294936	y
Lipoprotein	Bacteria	Proteobacteria	Gammaproteobacteria	Vibrionales	Vibrionaceae	Photobacterium	Photobacterium lipolyticum	A0A2T3MT16	Photobacterium lipolyticum.	272	266810	y
Lipoprotein	Bacteria	Proteobacteria	Gammaproteobacteria	Vibrionales	Vibrionaceae	Photobacterium	Photobacterium aquimaris	A0A2T3IG78	Photobacterium aquimaris.	272	512643	y
Lipoprotein	Bacteria	Proteobacteria	Gammaproteobacteria	Vibrionales	Vibrionaceae	Vibrio	Vibrio tapetis subsp. tapetis	A0A2N8ZC11	Vibrio tapetis subsp. tapetis.	267	1671868	y
Lipoprotein	Bacteria	Proteobacteria	Gammaproteobacteria	Vibrionales	Vibrionaceae	Vibrio	Vibrio splendidus	A0A2N7JP13	Vibrio splendidus.	267	29497	y
Lipoprotein	Bacteria	Proteobacteria	Gammaproteobacteria	Vibrionales	Vibrionaceae	Vibrio	Vibrio sp. 10N.286.49.B3	A0A2N7D619	Vibrio sp. 10N.286.49.B3.	267	1880855	y
Lipoprotein	Bacteria	Proteobacteria	Gammaproteobacteria	Vibrionales	Vibrionaceae	Vibrio	Vibrio sp. 10N.286.49.C2	A0A2N7D1D9	Vibrio sp. 10N.286.49.C2.	267	1880856	y
Lipoprotein	Bacteria	Proteobacteria	Gammaproteobacteria	Vibrionales	Vibrionaceae	Vibrio	Vibrio sp. 10N.286.49.C2	A0A2N7D012	Vibrio sp. 10N.286.49.C2.	270	1880856	y
Lipoprotein	Bacteria	Proteobacteria	Gammaproteobacteria	Vibrionales	Vibrionaceae	Vibrio	Vibrio sp. HA2012	A0A2M8GVU5	Vibrio sp. HA2012.	269	1971595	y
Lipoprotein	Bacteria	Proteobacteria	Gammaproteobacteria	Vibrionales	Vibrionaceae	Vibrio	Vibrio diazotrophicus	A0A2J8I569	Vibrio diazotrophicus.	267	685	y
Methionine ABC transporter substrate-binding protein MetQ	Bacteria	Proteobacteria	Gammaproteobacteria	Vibrionales	Vibrionaceae	Paraphotobacterium	Paraphotobacterium marinum	A0A220VBN8	Paraphotobacterium marinum.	264	1755811	y
Lipoprotein	Bacteria	Proteobacteria	Gammaproteobacteria	Vibrionales	Vibrionaceae	Vibrio	Vibrio gazogenes	A0A1Z2SHE3	Vibrio gazogenes.	269	687	y
Lipoprotein	Bacteria	Proteobacteria	Gammaproteobacteria	Vibrionales	Vibrionaceae	Vibrio	Vibrio anguillarum	A0A1Y0NWG4	Vibrio anguillarum	269	55601	y
Lipoprotein	Bacteria	Proteobacteria	Gammaproteobacteria	Vibrionales	Vibrionaceae	Photobacterium	Photobacterium damselae subsp. damselae	A0A1X9U2K1	Photobacterium damselae subsp. damselae	274	85581	y
Lipoprotein	Bacteria	Proteobacteria	Gammaproteobacteria	Vibrionales	Vibrionaceae	Vibrio	Vibrio sp. qd031	A0A1X1MPD0	Vibrio sp. qd031.	269	1603038	y
Lipoprotein	Bacteria	Proteobacteria	Gammaproteobacteria	Vibrionales	Vibrionaceae	Vibrio	Vibrio alginolyticus	A0A1W6UWN1	Vibrio alginolyticus.	267	663	y
Lipoprotein	Bacteria	Proteobacteria	Gammaproteobacteria	Vibrionales	Vibrionaceae	Salinivibrio	Salinivibrio sp. IB872	A0A1V3I3M5	Salinivibrio sp. IB872.	265	1766123	y
Lipoprotein	Bacteria	Proteobacteria	Gammaproteobacteria	Vibrionales	Vibrionaceae	Salinivibrio	Salinivibrio sp. MA351	A0A1V3HDM7	Salinivibrio sp. MA351.	265	1909453	y
Lipoprotein	Bacteria	Proteobacteria	Gammaproteobacteria	Vibrionales	Vibrionaceae	Salinivibrio	Salinivibrio sp. MA351	A0A1V3H686	Salinivibrio sp. MA351.	271	1909453	y
Lipoprotein	Bacteria	Proteobacteria	Gammaproteobacteria	Vibrionales	Vibrionaceae	Vibrio	Vibrio coralliilyticus	A0A1V0I9M5	Vibrio coralliilyticus.	269	190893	y
Lipoprotein	Bacteria	Proteobacteria	Gammaproteobacteria	Vibrionales	Vibrionaceae	Vibrio	Vibrio cincinnatiensis DSM 19608	A0A1T4RX63	Vibrio cincinnatiensis DSM 19608.	269	1123491	y
D-methionine transport system substrate-binding protein	Bacteria	Proteobacteria	Gammaproteobacteria	Vibrionales	Vibrionaceae	Vibrio	Vibrio cincinnatiensis DSM 19608	A0A1T4ND48	Vibrio cincinnatiensis DSM 19608.	264	1123491	y
Lipoprotein	Bacteria	Proteobacteria	Gammaproteobacteria	Vibrionales	Vibrionaceae	Vibrio	Vibrio sp. JB196	A0A1R4J5R0	Vibrio sp. JB196.	267	1434844	y
Lipoprotein	Bacteria	Proteobacteria	Gammaproteobacteria	Vibrionales	Vibrionaceae	Vibrio	Vibrio palustris	A0A1R4B1A2	Vibrio palustris.	269	1918946	y
Lipoprotein	Bacteria	Proteobacteria	Gammaproteobacteria	Vibrionales	Vibrionaceae	Vibrio	Vibrio aerogenes CECT 7868	A0A1M5Z1N3	Vibrio aerogenes CECT 7868.	269	1216006	y
Lipoprotein	Bacteria	Proteobacteria	Gammaproteobacteria	Vibrionales	Vibrionaceae	Vibrio	Vibrio barjaei	A0A1J4R4Y2	Vibrio barjaei.	269	1676683	y
Lipoprotein	Bacteria	Proteobacteria	Gammaproteobacteria	Vibrionales	Vibrionaceae	Vibrio	Vibrio xiamenensis	A0A1G8H679	Vibrio xiamenensis.	269	861298	y
Lipoprotein	Bacteria	Proteobacteria	Gammaproteobacteria	Vibrionales	Vibrionaceae	Vibrio	Vibrio xiamenensis	A0A1G7WWS0	Vibrio xiamenensis.	267	861298	y
Lipoprotein	Bacteria	Proteobacteria	Gammaproteobacteria	Vibrionales	Vibrionaceae	Vibrio	Vibrio rumoiensis 1S-45	A0A1E5E0T6	Vibrio rumoiensis 1S-45.	265	1188252
Lipoprotein	Bacteria	Proteobacteria	Gammaproteobacteria	Vibrionales	Vibrionaceae	Vibrio	Vibrio genomosp. F6 str. FF-238	A0A1E5D5V2	Vibrio genomosp. F6 str. FF-238.	269	1191298	y
Lipoprotein	Bacteria	Proteobacteria	Gammaproteobacteria	Vibrionales	Vibrionaceae	Enterovibrio	Enterovibrio norvegicus FF-454	A0A1E5CDU9	Enterovibrio norvegicus FF-454.	270	1185651	y
Lipoprotein	Bacteria	Proteobacteria	Gammaproteobacteria	Vibrionales	Vibrionaceae	Vibrio	Vibrio genomosp. F10 str. ZF-129	A0A1E5BH75	Vibrio genomosp. F10 str. ZF-129.	269	1187848	y
Lipoprotein	Bacteria	Proteobacteria	Gammaproteobacteria	Vibrionales	Vibrionaceae	Aliivibrio	Aliivibrio fischeri	A0A1B9PL43	Aliivibrio fischeri	269	668	y
Lipoprotein	Bacteria	Proteobacteria	Gammaproteobacteria	Vibrionales	Vibrionaceae	Vibrio	Vibrio natriegens	A0A1B1E9E3	Vibrio natriegens.	267	691	y
Lipoprotein	Bacteria	Proteobacteria	Gammaproteobacteria	Vibrionales	Vibrionaceae	Vibrio	Vibrio sp. UCD-FRSSP16_10	A0A1A6L1M7	Vibrio sp. UCD-FRSSP16_10.	267	1853257	y
Lipoprotein	Bacteria	Proteobacteria	Gammaproteobacteria	Vibrionales	Vibrionaceae	Vibrio	Vibrio sp. UCD-FRSSP16_10	A0A1A6KAS7	Vibrio sp. UCD-FRSSP16_10.	269	1853257	y
Lipoprotein	Bacteria	Proteobacteria	Gammaproteobacteria	Vibrionales	Vibrionaceae	Photobacterium	Photobacterium jeanii	A0A178K9G2	Photobacterium jeanii.	271	858640	y
Lipoprotein	Bacteria	Proteobacteria	Gammaproteobacteria	Vibrionales	Vibrionaceae	Vibrio	Vibrio cidicii	A0A151KWK5	Vibrio cidicii.	269	1763883	y
Lipoprotein	Bacteria	Proteobacteria	Gammaproteobacteria	Vibrionales	Vibrionaceae	Enterovibrio	Enterovibrio coralii	A0A135I346	Enterovibrio coralii.	271	294935	y
Lipoprotein	Bacteria	Proteobacteria	Gammaproteobacteria	Vibrionales	Vibrionaceae	Vibrio	Vibrio toranzoniae	A0A109D8U2	Vibrio toranzoniae.	269	1194427	y
Lipoprotein	Bacteria	Proteobacteria	Gammaproteobacteria	Vibrionales	Vibrionaceae	Vibrio	Vibrio furnissii	A0A0Q2M7J2	Vibrio furnissii.	269	29494	y
Lipoprotein	Bacteria	Proteobacteria	Gammaproteobacteria	Vibrionales	Vibrionaceae	Photobacterium	Photobacterium leiognathi subsp. mandapamensis	A0A0M9F7E5	Photobacterium leiognathi subsp. mandapamensis	271	48408	y
Lipoprotein	Bacteria	Proteobacteria	Gammaproteobacteria	Vibrionales	Vibrionaceae	Vibrio	Vibrio hepatarius	A0A0M0I5P8	Vibrio hepatarius.	267	171383	y
Lipoprotein	Bacteria	Proteobacteria	Gammaproteobacteria	Vibrionales	Vibrionaceae	Vibrio	Vibrio nereis	A0A0M0HRD6	Vibrio nereis.	267	693	y
Lipoprotein	Bacteria	Proteobacteria	Gammaproteobacteria	Vibrionales	Vibrionaceae	Photobacterium	Photobacterium ganghwense	A0A0J1HJD2	Photobacterium ganghwense.	270	320778	y
Lipoprotein	Bacteria	Proteobacteria	Gammaproteobacteria	Vibrionales	Vibrionaceae	Photobacterium	Photobacterium aquae	A0A0J1H9Z8	Photobacterium aquae.	271	1195763	y
Lipoprotein	Bacteria	Proteobacteria	Gammaproteobacteria	Vibrionales	Vibrionaceae	Photobacterium	Photobacterium ganghwense	A0A0J1H8M7	Photobacterium ganghwense.	267	320778	y
Lipoprotein	Bacteria	Proteobacteria	Gammaproteobacteria	Vibrionales	Vibrionaceae	Vibrio	Vibrio alginolyticus	A0A0G9LVQ4	Vibrio alginolyticus.	269	663	y
Lipoprotein	Bacteria	Proteobacteria	Gammaproteobacteria	Vibrionales	Vibrionaceae	Grimontia	Grimontia sp. AD028	A0A0F5ZS83	Grimontia sp. AD028.	270	1581149	y
Lipoprotein	Bacteria	Proteobacteria	Gammaproteobacteria	Vibrionales	Vibrionaceae	Photobacterium	Photobacterium halotolerans	A0A0F5V8T7	Photobacterium halotolerans.	274	265726	y
Lipoprotein	Bacteria	Proteobacteria	Gammaproteobacteria	Vibrionales	Vibrionaceae	Salinivibrio	Salinivibrio sp. KP-1	A0A0F5AUU3	Salinivibrio sp. KP-1.	271	1406902	y
Lipoprotein	Bacteria	Proteobacteria	Gammaproteobacteria	Vibrionales	Vibrionaceae	Salinivibrio	Salinivibrio sp. KP-1	A0A0F5ATW2	Salinivibrio sp. KP-1.	265	1406902	y
Lipoprotein	Bacteria	Proteobacteria	Gammaproteobacteria	Vibrionales	Vibrionaceae	Vibrio	Vibrio sp. S234-5	A0A0F2IEA1	Vibrio sp. S234-5.	267	1616781	y
Lipoprotein	Bacteria	Proteobacteria	Gammaproteobacteria	Vibrionales	Vibrionaceae	Vibrio	Vibrio mytili	A0A0C3I3G5	Vibrio mytili.	267	50718	y
Lipoprotein	Bacteria	Proteobacteria	Gammaproteobacteria	Vibrionales	Vibrionaceae	Photobacterium	Photobacterium gaetbulicola	A0A0B9H7N1	Photobacterium gaetbulicola.	271	1295392	y
Lipoprotein	Bacteria	Proteobacteria	Gammaproteobacteria	Vibrionales	Vibrionaceae	Vibrio	Vibrio sp. JCM 19236	A0A0B8QA06	Vibrio sp. JCM 19236.	267	1481926	y
Lipoprotein	Bacteria	Proteobacteria	Gammaproteobacteria	Vibrionales	Vibrionaceae	Vibrio	Vibrio sp. JCM 19236	A0A0B8Q5G2	Vibrio sp. JCM 19236.	278	1481926	y
Lipoprotein	Bacteria	Proteobacteria	Gammaproteobacteria	Vibrionales	Vibrionaceae	Vibrio	Vibrio sp. C7	A0A090R7H3	Vibrio sp. C7.	269	1001886	y
Lipoprotein	Bacteria	Proteobacteria	Gammaproteobacteria	Vibrionales	Vibrionaceae	Vibrio	Vibrio vulnificus	A0A087I8T5	Vibrio vulnificus.	269	672	y
Lipoprotein	Bacteria	Proteobacteria	Gammaproteobacteria	Pseudomonadales	Ventosimonadaceae	Ventosimonas	Ventosimonas gracilis	A0A139SXG0	Ventosimonas gracilis.	275	1680762
Lipoprotein	Bacteria	Proteobacteria	Gammaproteobacteria	Enterobacterales	Thorselliaceae	Thorsellia	Thorsellia anophelis DSM 18579	A0A1I0EV07	Thorsellia anophelis DSM 18579.	266	1123402
Lipoprotein	Bacteria	Proteobacteria	Gammaproteobacteria	Enterobacterales	Thorselliaceae	Thorsellia	Thorsellia anophelis DSM 18579	A0A1I0B4R6	Thorsellia anophelis DSM 18579.	266	1123402
NLPA lipoprotein	Bacteria	Proteobacteria	Gammaproteobacteria	Aeromonadales	Succinivibrionaceae	Succinatimonas	Succinatimonas sp. CAG:777	R5F001	Succinatimonas sp. CAG:777.	274	1262974
Uncharacterized protein	Bacteria	Proteobacteria	Gammaproteobacteria	Aeromonadales	Succinivibrionaceae	Succinatimonas	Succinatimonas sp. CAG:777	R5ELC3	Succinatimonas sp. CAG:777.	263	1262974
Putative D-methionine-binding lipoprotein MetQ	Bacteria	Proteobacteria	Gammaproteobacteria	Aeromonadales	Succinivibrionaceae	Succinatimonas	Succinatimonas sp. CAG:777	R5EG89	Succinatimonas sp. CAG:777.	282	1262974	y
Putative D-methionine-binding lipoprotein MetQ	Bacteria	Proteobacteria	Gammaproteobacteria	Aeromonadales	Succinivibrionaceae	Succinatimonas	Succinatimonas sp. CAG:777	R5ECG1	Succinatimonas sp. CAG:777.	284	1262974	y
Lipoprotein| YaeC family	Bacteria	Proteobacteria	Gammaproteobacteria	Aeromonadales	Succinivibrionaceae	Succinatimonas	Succinatimonas hippei YIT 12066	E8LMU5	Succinatimonas hippei (strain DSM 22608 / JCM 16073 / KCTC 15190 / YIT12066)	259	762983
NLPA lipoprotein	Bacteria	Proteobacteria	Gammaproteobacteria	Aeromonadales	Succinivibrionaceae	Succinatimonas	Succinatimonas hippei YIT 12066	E8LMD8	Succinatimonas hippei (strain DSM 22608 / JCM 16073 / KCTC 15190 / YIT12066)	293	762983	y
Methionine-binding protein	Bacteria	Proteobacteria	Gammaproteobacteria	Aeromonadales	Succinivibrionaceae	Succinivibrio	Succinivibrio sp.	A0A3C1W1W2	Succinivibrio sp.	282	2053619	y
Methionine ABC transporter substrate-binding protein	Bacteria	Proteobacteria	Gammaproteobacteria	Aeromonadales	Succinivibrionaceae	Succinivibrio	Succinivibrio sp.	A0A3C1W132	Succinivibrio sp.	261	2053619
Methionine-binding protein	Bacteria	Proteobacteria	Gammaproteobacteria	Aeromonadales	Succinivibrionaceae	Succinivibrio	Succinivibrio sp.	A0A3C1VZD6	Succinivibrio sp.	284	2053619	y
Metal ABC transporter substrate-binding protein	Bacteria	Proteobacteria	Gammaproteobacteria	Aeromonadales	Succinivibrionaceae	unclassified Succinivibrionaceae	Succinivibrionaceae bacterium	A0A3C0C9R5	Succinivibrionaceae bacterium.	278	2053620
Metal ABC transporter substrate-binding protein	Bacteria	Proteobacteria	Gammaproteobacteria	Aeromonadales	Succinivibrionaceae	unclassified Succinivibrionaceae	Succinivibrionaceae bacterium	A0A348YLM2	Succinivibrionaceae bacterium.	279	2053620
Lipoprotein	Bacteria	Proteobacteria	Gammaproteobacteria	Aeromonadales	Succinivibrionaceae	unclassified Succinivibrionaceae	Succinivibrionaceae bacterium	A0A348YLA2	Succinivibrionaceae bacterium.	294	2053620	y
Methionine-binding protein	Bacteria	Proteobacteria	Gammaproteobacteria	Aeromonadales	Succinivibrionaceae	unclassified Succinivibrionaceae	Succinivibrionaceae bacterium	A0A348YJK0	Succinivibrionaceae bacterium.	288	2053620	y
Metal ABC transporter substrate-binding protein	Bacteria	Proteobacteria	Gammaproteobacteria	Aeromonadales	Succinivibrionaceae	Succinivibrio	Succinivibrio sp.	A0A316SQB2	Succinivibrio sp.	277	2053619
Metal ABC transporter substrate-binding protein	Bacteria	Proteobacteria	Gammaproteobacteria	Aeromonadales	Succinivibrionaceae	Succinivibrio	Succinivibrio sp.	A0A316SDQ8	Succinivibrio sp.	270	2053619
Lipoprotein	Bacteria	Proteobacteria	Gammaproteobacteria	Aeromonadales	Succinivibrionaceae	Anaerobiospirillum	Anaerobiospirillum thomasii	A0A2X0VMZ1	Anaerobiospirillum thomasii.	284	179995	y
Lipoprotein 28	Bacteria	Proteobacteria	Gammaproteobacteria	Aeromonadales	Succinivibrionaceae	Anaerobiospirillum	Anaerobiospirillum thomasii	A0A2X0VCN0	Anaerobiospirillum thomasii.	260	179995
D-methionine transport system substrate-binding protein	Bacteria	Proteobacteria	Gammaproteobacteria	Aeromonadales	Succinivibrionaceae	Succinivibrio	Succinivibrio dextrinosolvens DSM 3072	A0A1T4VV60	Succinivibrio dextrinosolvens DSM 3072.	266	1123324
D-methionine transport system substrate-binding protein	Bacteria	Proteobacteria	Gammaproteobacteria	Aeromonadales	Succinivibrionaceae	Succinivibrio	Succinivibrio dextrinosolvens DSM 3072	A0A1T4VUN5	Succinivibrio dextrinosolvens DSM 3072.	281	1123324
D-methionine transport system substrate-binding protein	Bacteria	Proteobacteria	Gammaproteobacteria	Aeromonadales	Succinivibrionaceae	Succinivibrio	Succinivibrio dextrinosolvens DSM 3072	A0A1T4VHH2	Succinivibrio dextrinosolvens DSM 3072.	264	1123324
Lipoprotein	Bacteria	Proteobacteria	Gammaproteobacteria	Aeromonadales	Succinivibrionaceae	Succinivibrio	Succinivibrio dextrinosolvens DSM 3072	A0A1T4V1K6	Succinivibrio dextrinosolvens DSM 3072.	272	1123324
Lipoprotein	Bacteria	Proteobacteria	Gammaproteobacteria	Aeromonadales	Succinivibrionaceae	Succinivibrio	Succinivibrio dextrinosolvens DSM 3072	A0A1T4V1G2	Succinivibrio dextrinosolvens DSM 3072.	281	1123324
D-methionine transport system substrate-binding protein	Bacteria	Proteobacteria	Gammaproteobacteria	Aeromonadales	Succinivibrionaceae	Succinivibrio	Succinivibrio dextrinosolvens DSM 3072	A0A1T4UXG4	Succinivibrio dextrinosolvens DSM 3072.	283	1123324	y
D-methionine transport system substrate-binding protein	Bacteria	Proteobacteria	Gammaproteobacteria	Aeromonadales	Succinivibrionaceae	Succinivibrio	Succinivibrio dextrinosolvens DSM 3072	A0A1T4UVM6	Succinivibrio dextrinosolvens DSM 3072.	264	1123324
ABC transporter substrate-binding protein	Bacteria	Proteobacteria	Gammaproteobacteria	Oceanospirillales	Saccharospirillaceae	Reinekea	Reinekea sp. SSH23	A0A5C8ZBC6	Reinekea sp. SSH23.	275	2593301	y
Lipoprotein	Bacteria	Proteobacteria	Gammaproteobacteria	Oceanospirillales	Saccharospirillaceae	Reinekea	Reinekea sp. SSH23	A0A5C8ZAC8	Reinekea sp. SSH23.	266	2593301	y
Lipoprotein	Bacteria	Proteobacteria	Gammaproteobacteria	Oceanospirillales	Saccharospirillaceae	Reinekea	Reinekea marinisedimentorum	A0A4R3IBG5	Reinekea marinisedimentorum.	266	230495	y
ABC-type metal ion transport system| periplasmic component/surface antigen	Bacteria	Proteobacteria	Gammaproteobacteria	Xanthomonadales	Rhodanobacteraceae	Rhodanobacter	Rhodanobacter denitrificans	M4NQ63	Rhodanobacter denitrificans.	264	666685	y
Lipoprotein	Bacteria	Proteobacteria	Gammaproteobacteria	Xanthomonadales	Rhodanobacteraceae	Rhodanobacter	Rhodanobacter sp. 115	I4WF61	Rhodanobacter sp. 115.	266	1162282	y
Lipoprotein	Bacteria	Proteobacteria	Gammaproteobacteria	Xanthomonadales	Rhodanobacteraceae	Rhodanobacter	Rhodanobacter spathiphylli B39	I4W3Q6	Rhodanobacter spathiphylli B39.	265	1163407	y
Lipoprotein	Bacteria	Proteobacteria	Gammaproteobacteria	Xanthomonadales	Rhodanobacteraceae	Rhodanobacter	Rhodanobacter fulvus Jip2	I4VZZ8	Rhodanobacter fulvus Jip2.	265	1163408	y
Lipoprotein	Bacteria	Proteobacteria	Gammaproteobacteria	Xanthomonadales	Rhodanobacteraceae	Frateuria	Frateuria aurantia DSM 6220	H8L3Y8	Frateuria aurantia (strain ATCC 33424 / DSM 6220 / NBRC 3245 / NCIMB 13370)	267	767434	y
Lipoprotein	Bacteria	Proteobacteria	Gammaproteobacteria	Xanthomonadales	Rhodanobacteraceae	Rhodanobacter	Rhodanobacter sp. T12-5	A0A5A7VRK7	Rhodanobacter sp. T12-5.	273	2024611	y
Lipoprotein	Bacteria	Proteobacteria	Gammaproteobacteria	Xanthomonadales	Rhodanobacteraceae	Luteibacter	Luteibacter yeojuensis	A0A561HJH9	Luteibacter yeojuensis.	283	345309	y
ABC transporter substrate-binding protein	Bacteria	Proteobacteria	Gammaproteobacteria	Xanthomonadales	Rhodanobacteraceae	Rhodanobacter	Rhodanobacter sp.	A0A522G700	Rhodanobacter sp.	261	1883446	y
Lipoprotein	Bacteria	Proteobacteria	Gammaproteobacteria	Xanthomonadales	Rhodanobacteraceae	Rhodanobacter	Rhodanobacter glycinis	A0A502BYC6	Rhodanobacter glycinis.	265	582702	y
Lipoprotein	Bacteria	Proteobacteria	Gammaproteobacteria	Xanthomonadales	Rhodanobacteraceae	Luteibacter	Luteibacter rhizovicinus	A0A4R3YPY6	Luteibacter rhizovicinus.	266	242606	y
Lipoprotein	Bacteria	Proteobacteria	Gammaproteobacteria	Xanthomonadales	Rhodanobacteraceae	Pseudofulvimonas	Pseudofulvimonas gallinarii	A0A4R3L379	Pseudofulvimonas gallinarii.	266	634155	y
Lipoprotein	Bacteria	Proteobacteria	Gammaproteobacteria	Xanthomonadales	Rhodanobacteraceae	Dyella	Dyella soli	A0A4R0YVS0	Dyella soli.	268	522319	y
Lipoprotein	Bacteria	Proteobacteria	Gammaproteobacteria	Xanthomonadales	Rhodanobacteraceae	Dyella	Dyella soli	A0A4R0YNZ5	Dyella soli.	266	522319	y
ABC transporter substrate-binding protein	Bacteria	Proteobacteria	Gammaproteobacteria	Xanthomonadales	Rhodanobacteraceae	Dyella	Dyella sp. 4M-K27	A0A432LZZ9	Dyella sp. 4M-K27.	264	1927959	y
Lipoprotein	Bacteria	Proteobacteria	Gammaproteobacteria	Xanthomonadales	Rhodanobacteraceae	Dyella	Dyella sp. DHOA06	A0A432LY31	Dyella sp. DHOA06.	265	1920169	y
ABC transporter substrate-binding protein	Bacteria	Proteobacteria	Gammaproteobacteria	Xanthomonadales	Rhodanobacteraceae	Dyella	Dyella sp. M7H15-1	A0A410UGJ9	Dyella sp. M7H15-1.	264	2501295	y
MetQ/NlpA family ABC transporter substrate-binding protein	Bacteria	Proteobacteria	Gammaproteobacteria	Xanthomonadales	Rhodanobacteraceae	Dyella	Dyella sp. 4G-K06	A0A370X9N8	Dyella sp. 4G-K06.	264	1927958	y
Lipoprotein	Bacteria	Proteobacteria	Gammaproteobacteria	Xanthomonadales	Rhodanobacteraceae	Dyella	Dyella sp. 4MSK11	A0A370WWH6	Dyella sp. 4MSK11.	265	1927960	y
Lipoprotein	Bacteria	Proteobacteria	Gammaproteobacteria	Xanthomonadales	Rhodanobacteraceae	Dyella	Dyella sp. DHG54	A0A370KDL0	Dyella sp. DHG54.	266	1920168	y
Lipoprotein	Bacteria	Proteobacteria	Gammaproteobacteria	Xanthomonadales	Rhodanobacteraceae	Dyella	Dyella sp. L4-6	A0A369UNB7	Dyella sp. L4-6.	265	2282381	y
D-methionine transport system substrate-binding protein	Bacteria	Proteobacteria	Gammaproteobacteria	Xanthomonadales	Rhodanobacteraceae	Fulvimonas	Fulvimonas soli	A0A316IE86	Fulvimonas soli.	264	155197	y
Methionine ABC transporter substrate-binding protein	Bacteria	Proteobacteria	Gammaproteobacteria	Xanthomonadales	Rhodanobacteraceae	Rhodanobacter	Rhodanobacter denitrificans	A0A2W5KRX4	Rhodanobacter denitrificans.	257	666685
Lipoprotein	Bacteria	Proteobacteria	Gammaproteobacteria	Xanthomonadales	Rhodanobacteraceae	Luteibacter	Luteibacter sp. OK325	A0A2T5L641	Luteibacter sp. OK325.	270	2135670	y
Lipoprotein	Bacteria	Proteobacteria	Gammaproteobacteria	Xanthomonadales	Rhodanobacteraceae	Dyella	Dyella sp. AD56	A0A2N7QQX6	Dyella sp. AD56.	278	1528744	y
Lipoprotein	Bacteria	Proteobacteria	Gammaproteobacteria	Xanthomonadales	Rhodanobacteraceae	Rhodanobacter	Rhodanobacter sp. C03	A0A1V3PVJ4	Rhodanobacter sp. C03.	265	1945858	y
Lipoprotein	Bacteria	Proteobacteria	Gammaproteobacteria	Xanthomonadales	Rhodanobacteraceae	Rhodanobacter	Rhodanobacter sp. C01	A0A1V3PIE7	Rhodanobacter sp. C01.	265	1945856	y
Methionine ABC transporter substrate-binding protein	Bacteria	Proteobacteria	Gammaproteobacteria	Xanthomonadales	Rhodanobacteraceae	Rhodanobacter	Rhodanobacter sp. C06	A0A1V3PCG0	Rhodanobacter sp. C06.	262	1945854	y
Methionine ABC transporter substrate-binding protein	Bacteria	Proteobacteria	Gammaproteobacteria	Xanthomonadales	Rhodanobacteraceae	Rhodanobacter	Rhodanobacter sp. C05	A0A1V3P4L3	Rhodanobacter sp. C05.	264	1945855	y
Lipoprotein	Bacteria	Proteobacteria	Gammaproteobacteria	Xanthomonadales	Rhodanobacteraceae	Luteibacter	Luteibacter sp. 22Crub2.1	A0A1T5CHI0	Luteibacter sp. 22Crub2.1.	269	1283288	y
Methionine ABC transporter substrate-binding protein	Bacteria	Proteobacteria	Gammaproteobacteria	Xanthomonadales	Rhodanobacteraceae	Rhodanobacter	Rhodanobacter sp. 68-29	A0A1M3P238	Rhodanobacter sp. 68-29.	262	1895823	y
Lipoprotein	Bacteria	Proteobacteria	Gammaproteobacteria	Xanthomonadales	Rhodanobacteraceae	Dyella	Dyella marensis	A0A1I2CCH1	Dyella marensis.	267	500610	y
Lipoprotein	Bacteria	Proteobacteria	Gammaproteobacteria	Xanthomonadales	Rhodanobacteraceae	Luteibacter	Luteibacter sp. 329MFSha	A0A1I0N0F1	Luteibacter sp. 329MFSha.	271	1798239	y
Methionine ABC transporter substrate-binding protein	Bacteria	Proteobacteria	Gammaproteobacteria	Xanthomonadales	Rhodanobacteraceae	Dokdonella	Dokdonella koreensis DS-123	A0A160DUA4	Dokdonella koreensis DS-123.	257	1300342
Methionine ABC transporter substrate-binding protein	Bacteria	Proteobacteria	Gammaproteobacteria	Xanthomonadales	Rhodanobacteraceae	Rhodanobacter	Rhodanobacter thiooxydans	A0A154QF24	Rhodanobacter thiooxydans.	263	416169	y
Lipoprotein	Bacteria	Proteobacteria	Gammaproteobacteria	Xanthomonadales	Rhodanobacteraceae	Frateuria	Frateuria sp. Soil773	A0A0Q9PNR6	Frateuria sp. Soil773.	267	1736407	y
Lipoprotein	Bacteria	Proteobacteria	Gammaproteobacteria	Xanthomonadales	Rhodanobacteraceae	Luteibacter	Luteibacter rhizovicinus DSM 16549	A0A0G9HJZ2	Luteibacter rhizovicinus DSM 16549.	270	1440763	y
Lipoprotein	Bacteria	Proteobacteria	Gammaproteobacteria	Xanthomonadales	Rhodanobacteraceae	Luteibacter	Luteibacter yeojuensis	A0A0F3KGQ6	Luteibacter yeojuensis.	269	345309	y
Lipoprotein	Bacteria	Proteobacteria	Gammaproteobacteria	Alteromonadales	Psychromonadaceae	Psychromonas	Psychromonas sp. CNPT3	M4U763	Psychromonas sp. CNPT3.	272	314282	y
Lipoprotein	Bacteria	Proteobacteria	Gammaproteobacteria	Alteromonadales	Psychromonadaceae	Psychromonas	Psychromonas sp. CNPT3	M4U5W8	Psychromonas sp. CNPT3.	267	314282	y
Lipoprotein	Bacteria	Proteobacteria	Gammaproteobacteria	Alteromonadales	Psychromonadaceae	Psychromonas	Psychromonas sp. RZ22	A0A4Y7ZYA2	Psychromonas sp. RZ22.	272	2555643	y
Lipoprotein	Bacteria	Proteobacteria	Gammaproteobacteria	Alteromonadales	Psychromonadaceae	Psychromonas	Psychromonas sp. RZ5	A0A4Y7ZQ79	Psychromonas sp. RZ5.	271	2555642	y
Lipoprotein	Bacteria	Proteobacteria	Gammaproteobacteria	Alteromonadales	Psychromonadaceae	Psychromonas	Psychromonas sp. RZ5	A0A4Y7ZGW4	Psychromonas sp. RZ5.	267	2555642	y
Lipoprotein	Bacteria	Proteobacteria	Gammaproteobacteria	Alteromonadales	Psychromonadaceae	Psychromonas	Psychromonas sp. B3M02	A0A366W4B6	Psychromonas sp. B3M02.	267	2267226	y
Lipoprotein	Bacteria	Proteobacteria	Gammaproteobacteria	Alteromonadales	Psychromonadaceae	Psychromonas	Psychromonas sp. MB-3u-54	A0A2N1DRM5	Psychromonas sp. MB-3u-54.	267	2058319	y
Lipoprotein	Bacteria	Proteobacteria	Gammaproteobacteria	Alteromonadales	Psychromonadaceae	Psychromonas	Psychromonas sp. MB-3u-54	A0A2N1DLA2	Psychromonas sp. MB-3u-54.	269	2058319	y
Lipoprotein	Bacteria	Proteobacteria	Gammaproteobacteria	Alteromonadales	Psychromonadaceae	Psychromonas	Psychromonas sp. Urea-02u-13	A0A2N1A0T2	Psychromonas sp. Urea-02u-13.	273	2058326	y
NLPA lipoprotein	Bacteria	Proteobacteria	Gammaproteobacteria	Pseudomonadales	Pseudomonadaceae	Pseudomonas	Pseudomonas sp. BAY1663	W9T410	Pseudomonas sp. BAY1663.	265	1439940
Methionine ABC transporter substrate-binding protein	Bacteria	Proteobacteria	Gammaproteobacteria	Pseudomonadales	Pseudomonadaceae	Pseudomonas	Pseudomonas stutzeri	W8R2D7	Pseudomonas stutzeri	257	316
D-methionine-binding lipoprotein metQ	Bacteria	Proteobacteria	Gammaproteobacteria	Pseudomonadales	Pseudomonadaceae	Pseudomonas	Pseudomonas pseudoalcaligenes CECT 5344	W6R1C9	Pseudomonas pseudoalcaligenes (strain CECT 5344)	256	1182590
Methionine ABC transporter substrate-binding protein	Bacteria	Proteobacteria	Gammaproteobacteria	Pseudomonadales	Pseudomonadaceae	Pseudomonas	Pseudomonas syringae CC1557	W0N1I3	Pseudomonas syringae CC1557.	260	1357279
Lipoprotein	Bacteria	Proteobacteria	Gammaproteobacteria	Pseudomonadales	Pseudomonadaceae	Pseudomonas	Pseudomonas aestus	U7A5B7	Pseudomonas sp. CMAA1215.	267	1387231
Putative D-methionine ABC transporter substrate-binding protein	Bacteria	Proteobacteria	Gammaproteobacteria	Pseudomonadales	Pseudomonadaceae	Pseudomonas	Pseudomonas resinovorans NBRC 106553	S6AUL3	Pseudomonas resinovorans NBRC 106553.	264	1245471
Putative ABC transporter substrate-binding protein	Bacteria	Proteobacteria	Gammaproteobacteria	Pseudomonadales	Pseudomonadaceae	Pseudomonas	Pseudomonas resinovorans NBRC 106553	S6AH86	Pseudomonas resinovorans NBRC 106553.	256	1245471
Putative ABC transporter substrate-binding protein	Bacteria	Proteobacteria	Gammaproteobacteria	Pseudomonadales	Pseudomonadaceae	Pseudomonas	Pseudomonas resinovorans NBRC 106553	S6ABY0	Pseudomonas resinovorans NBRC 106553.	260	1245471
Putative D-methionine ABC transporter substrate-binding protein	Bacteria	Proteobacteria	Gammaproteobacteria	Pseudomonadales	Pseudomonadaceae	Pseudomonas	Pseudomonas resinovorans NBRC 106553	S6ABS6	Pseudomonas resinovorans NBRC 106553.	261	1245471
Methionine ABC-type transport system| periplasmic substrate-binding protein	Bacteria	Proteobacteria	Gammaproteobacteria	Pseudomonadales	Pseudomonadaceae	Pseudomonas	Pseudomonas syringae pv. syringae SM	S3NDY9	Pseudomonas syringae pv. syringae SM.	262	1262350
Lipoprotein| NLPA family	Bacteria	Proteobacteria	Gammaproteobacteria	Pseudomonadales	Pseudomonadaceae	Pseudomonas	Pseudomonas protegens Pf-5	Q4KK57	Pseudomonas fluorescens (strain ATCC BAA-477 / NRRL B-23932 / Pf-5)	260	220664
Lipoprotein	Bacteria	Proteobacteria	Gammaproteobacteria	Pseudomonadales	Pseudomonadaceae	Pseudomonas	Pseudomonas fluorescens Pf0-1	Q3KDS8	Pseudomonas fluorescens (strain Pf0-1)	269	205922
YaeC family lipoprotein	Bacteria	Proteobacteria	Gammaproteobacteria	Pseudomonadales	Pseudomonadaceae	Pseudomonas	Pseudomonas sp. HPB0071	N2J5R6	Pseudomonas sp. HPB0071.	258	1203578
YaeC family lipoprotein	Bacteria	Proteobacteria	Gammaproteobacteria	Pseudomonadales	Pseudomonadaceae	Pseudomonas	Pseudomonas sp. HPB0071	N2J1W3	Pseudomonas sp. HPB0071.	274	1203578
YaeC family lipoprotein	Bacteria	Proteobacteria	Gammaproteobacteria	Pseudomonadales	Pseudomonadaceae	Pseudomonas	Pseudomonas sp. HPB0071	N2J0V5	Pseudomonas sp. HPB0071.	261	1203578
ABC transporter substrate-binding protein	Bacteria	Proteobacteria	Gammaproteobacteria	Pseudomonadales	Pseudomonadaceae	Pseudomonas	Pseudomonas sp. ATCC 13867	M4WTT4	Pseudomonas sp. ATCC 13867.	260	1294143
Methionine ABC transporter substrate-binding protein	Bacteria	Proteobacteria	Gammaproteobacteria	Pseudomonadales	Pseudomonadaceae	Pseudomonas	Pseudomonas furukawaii	L8MRA8	Pseudomonas furukawaii.	258	1149133
ABC-type metal ion transport system| periplasmic component/surface antigen	Bacteria	Proteobacteria	Gammaproteobacteria	Pseudomonadales	Pseudomonadaceae	Pseudomonas	Pseudomonas sp. GM33	J3FRS9	Pseudomonas sp. GM33.	256	1144329
D-methionine ABC transporter| periplasmic methionine-binding lipoprotein MetQ	Bacteria	Proteobacteria	Gammaproteobacteria	Pseudomonadales	Pseudomonadaceae	Pseudomonas	Pseudomonas fluorescens Q2-87	J2EY93	Pseudomonas fluorescens Q2-87.	269	1038922
Methionine ABC transporter substrate-binding protein	Bacteria	Proteobacteria	Gammaproteobacteria	Pseudomonadales	Pseudomonadaceae	Pseudomonas	Pseudomonas sp. M47T1	I4NAE4	Pseudomonas sp. M47T1.	263	1179778
NLPA lipoprotein	Bacteria	Proteobacteria	Gammaproteobacteria	Pseudomonadales	Pseudomonadaceae	Pseudomonas	Pseudomonas sp. M47T1	I4NAD3	Pseudomonas sp. M47T1.	260	1179778
Putative TonB-dependent receptor	Bacteria	Proteobacteria	Gammaproteobacteria	Pseudomonadales	Pseudomonadaceae	Pseudomonas	Pseudomonas sp. M47T1	I4N7Y5	Pseudomonas sp. M47T1.	257	1179778
NlpA	Bacteria	Proteobacteria	Gammaproteobacteria	Pseudomonadales	Pseudomonadaceae	Pseudomonas	Pseudomonas fluorescens F113	G8PX41	Pseudomonas fluorescens (strain F113)	257	1114970
NLPA lipoprotein	Bacteria	Proteobacteria	Gammaproteobacteria	Pseudomonadales	Pseudomonadaceae	Pseudomonas	Pseudomonas fulva 12-X	F6ADZ5	Pseudomonas fulva (strain 12-X)	264	743720
NLPA lipoprotein	Bacteria	Proteobacteria	Gammaproteobacteria	Pseudomonadales	Pseudomonadaceae	Pseudomonas	Pseudomonas fulva 12-X	F6ADT7	Pseudomonas fulva (strain 12-X)	259	743720
Lipoprotein| YaeC family	Bacteria	Proteobacteria	Gammaproteobacteria	Pseudomonadales	Pseudomonadaceae	Pseudomonas	Pseudomonas fulva 12-X	F6A9I6	Pseudomonas fulva (strain 12-X)	258	743720
D-methionine transport system substrate-binding protein	Bacteria	Proteobacteria	Gammaproteobacteria	Pseudomonadales	Pseudomonadaceae	Pseudomonas	Pseudomonas fluorescens WH6	E2XRF9	Pseudomonas fluorescens WH6.	264	746360
NLPA lipoprotein	Bacteria	Proteobacteria	Gammaproteobacteria	Pseudomonadales	Pseudomonadaceae	Azotobacter	Azotobacter vinelandii DJ	C1DNW1	Azotobacter vinelandii (strain DJ / ATCC BAA-1303)	273	322710
NLPA lipoprotein	Bacteria	Proteobacteria	Gammaproteobacteria	Pseudomonadales	Pseudomonadaceae	Pseudomonas	Pseudomonas putida W619	B1JAB9	Pseudomonas putida (strain W619)	259	390235
NLPA lipoprotein	Bacteria	Proteobacteria	Gammaproteobacteria	Pseudomonadales	Pseudomonadaceae	Pseudomonas	Pseudomonas putida GB-1	B0KHG9	Pseudomonas putida (strain GB-1)	256	76869
Uncharacterized protein	Bacteria	Proteobacteria	Gammaproteobacteria	Pseudomonadales	Pseudomonadaceae	Pseudomonas	Pseudomonas aeruginosa PA7	A6V5D8	Pseudomonas aeruginosa (strain PA7)	264	381754
NLPA lipoprotein	Bacteria	Proteobacteria	Gammaproteobacteria	Pseudomonadales	Pseudomonadaceae	Pseudomonas	Pseudomonas mendocina ymp	A4XUV6	Pseudomonas mendocina (strain ymp)	264	399739
D-methionine-binding lipoprotein MetQ	Bacteria	Proteobacteria	Gammaproteobacteria	Pseudomonadales	Pseudomonadaceae	Pseudomonas	Pseudomonas stutzeri A1501	A4VFJ3	Pseudomonas stutzeri (strain A1501)	257	379731
Methionine ABC transporter substrate-binding protein	Bacteria	Proteobacteria	Gammaproteobacteria	Pseudomonadales	Pseudomonadaceae	Pseudomonas	Pseudomonas sp. SD129	A0A5R9QIT5	Pseudomonas sp. SD129.	260	1880735
Methionine ABC transporter substrate-binding protein	Bacteria	Proteobacteria	Gammaproteobacteria	Pseudomonadales	Pseudomonadaceae	Pseudomonas	Pseudomonas sp. SD129	A0A5R9QC66	Pseudomonas sp. SD129.	257	1880735
ABC transporter substrate-binding protein	Bacteria	Proteobacteria	Gammaproteobacteria	Pseudomonadales	Pseudomonadaceae	Pseudomonas	Pseudomonas sp. C27(2019)	A0A5J6QFB7	Pseudomonas sp. C27	256	2604941
Methionine-binding lipoprotein MetQ	Bacteria	Proteobacteria	Gammaproteobacteria	Pseudomonadales	Pseudomonadaceae	Pseudomonas	Pseudomonas fluorescens	A0A5E7QHW7	Pseudomonas fluorescens.	260	294
Lipoprotein 28	Bacteria	Proteobacteria	Gammaproteobacteria	Pseudomonadales	Pseudomonadaceae	Pseudomonas	Pseudomonas fluorescens	A0A5E7LVA5	Pseudomonas fluorescens.	259	294
D-methionine-binding lipoprotein MetQ	Bacteria	Proteobacteria	Gammaproteobacteria	Pseudomonadales	Pseudomonadaceae	Pseudomonas	Pseudomonas fluorescens	A0A5E7KH58	Pseudomonas fluorescens.	256	294
D-methionine-binding lipoprotein MetQ	Bacteria	Proteobacteria	Gammaproteobacteria	Pseudomonadales	Pseudomonadaceae	Pseudomonas	Pseudomonas fluorescens	A0A5E7GMV9	Pseudomonas fluorescens.	269	294
Uncharacterized protein	Bacteria	Proteobacteria	Gammaproteobacteria	Pseudomonadales	Pseudomonadaceae	Pseudomonas	Pseudomonas fluorescens	A0A5E6UIV4	Pseudomonas fluorescens.	271	294
ABC transporter substrate-binding protein	Bacteria	Proteobacteria	Gammaproteobacteria	Pseudomonadales	Pseudomonadaceae	Pseudomonas	Pseudomonas sp.	A0A5C7TI25	Pseudomonas sp.	260	306
D-methionine transport system substrate-binding protein	Bacteria	Proteobacteria	Gammaproteobacteria	Pseudomonadales	Pseudomonadaceae	Pseudomonas	Pseudomonas duriflava	A0A562QMS5	Pseudomonas duriflava.	258	459528
D-methionine transport system substrate-binding protein	Bacteria	Proteobacteria	Gammaproteobacteria	Pseudomonadales	Pseudomonadaceae	Azomonas	Azomonas agilis	A0A562I1K7	Azomonas agilis.	275	116849
D-methionine transport system substrate-binding protein	Bacteria	Proteobacteria	Gammaproteobacteria	Pseudomonadales	Pseudomonadaceae	Pseudomonas	Pseudomonas sp. AG1028	A0A561DU92	Pseudomonas sp. AG1028.	259	2572911
MetQ/NlpA family ABC transporter substrate-binding protein	Bacteria	Proteobacteria	Gammaproteobacteria	Pseudomonadales	Pseudomonadaceae	Pseudomonas	Pseudomonas sp. DMKU_BBB3-04	A0A553H4W9	Pseudomonas sp. DMKU_BBB3-04.	263	2593654
ABC transporter substrate-binding protein	Bacteria	Proteobacteria	Gammaproteobacteria	Pseudomonadales	Pseudomonadaceae	Pseudomonas	Pseudomonas sp. DMKU_BBB3-04	A0A553GYQ0	Pseudomonas sp. DMKU_BBB3-04.	260	2593654
ABC transporter substrate-binding protein	Bacteria	Proteobacteria	Gammaproteobacteria	Pseudomonadales	Pseudomonadaceae	Pseudomonas	Pseudomonas sp. DMKU_BBB3-04	A0A553GWI8	Pseudomonas sp. DMKU_BBB3-04.	258	2593654
Methionine ABC transporter substrate-binding protein	Bacteria	Proteobacteria	Gammaproteobacteria	Pseudomonadales	Pseudomonadaceae	Pseudomonas	Pseudomonas psychrotolerans	A0A4Y5W0H8	Pseudomonas psychrotolerans.	280	237610
D-methionine transport system substrate-binding protein	Bacteria	Proteobacteria	Gammaproteobacteria	Pseudomonadales	Pseudomonadaceae	Thiopseudomonas	Thiopseudomonas denitrificans	A0A4R6U5D5	Thiopseudomonas denitrificans.	258	1501432
MetQ/NlpA family ABC transporter substrate-binding protein	Bacteria	Proteobacteria	Gammaproteobacteria	Pseudomonadales	Pseudomonadaceae	Azotobacter	Azotobacter chroococcum	A0A4Q9UT91	Azotobacter chroococcum.	272	353
Methionine ABC transporter substrate-binding protein	Bacteria	Proteobacteria	Gammaproteobacteria	Pseudomonadales	Pseudomonadaceae	unclassified Pseudomonadaceae	Pseudomonadaceae bacterium P17C	A0A4Q9R9W1	Pseudomonadaceae bacterium P17C.	257	2211397
Lipoprotein	Bacteria	Proteobacteria	Gammaproteobacteria	Pseudomonadales	Pseudomonadaceae	Pseudomonas	Pseudomonas putida	A0A4D6X5M6	Pseudomonas putida	267	303
TonB-dependent receptor	Bacteria	Proteobacteria	Gammaproteobacteria	Pseudomonadales	Pseudomonadaceae	Pseudomonas	Pseudomonas aeruginosa	A0A485H323	Pseudomonas aeruginosa.	260	287
Putative ABC transporter periplasmic binding protein	Bacteria	Proteobacteria	Gammaproteobacteria	Pseudomonadales	Pseudomonadaceae	Pseudomonas	Pseudomonas aeruginosa	A0A485GD00	Pseudomonas aeruginosa.	264	287
D-methionine-binding lipoprotein MetQ	Bacteria	Proteobacteria	Gammaproteobacteria	Pseudomonadales	Pseudomonadaceae	Pseudomonas	Pseudomonas syringae pv. actinidiae	A0A454FU83	Pseudomonas syringae pv. actinidiae.	256	103796
DL-methionine transporter subunit periplasmic-binding component of ABC superfamily	Bacteria	Proteobacteria	Gammaproteobacteria	Pseudomonadales	Pseudomonadaceae	Pseudomonas	Pseudomonas sp. JV241A	A0A446B4J3	Pseudomonas sp. JV241A.	256	2078785
D-methionine-binding lipoprotein MetQ	Bacteria	Proteobacteria	Gammaproteobacteria	Pseudomonadales	Pseudomonadaceae	Pseudomonas	Pseudomonas sp. JV241A	A0A446B2V8	Pseudomonas sp. JV241A.	267	2078785
Lipoprotein	Bacteria	Proteobacteria	Gammaproteobacteria	Pseudomonadales	Pseudomonadaceae	Pseudomonas	Pseudomonas moraviensis	A0A423NRD3	Pseudomonas moraviensis.	269	321662
Lipoprotein	Bacteria	Proteobacteria	Gammaproteobacteria	Pseudomonadales	Pseudomonadaceae	Pseudomonas	Pseudomonas fluorescens	A0A423NBA9	Pseudomonas fluorescens.	265	294
Lipoprotein	Bacteria	Proteobacteria	Gammaproteobacteria	Pseudomonadales	Pseudomonadaceae	Pseudomonas	Pseudomonas chlororaphis	A0A423DDD7	Pseudomonas chlororaphis.	269	587753
ABC transporter substrate-binding protein	Bacteria	Proteobacteria	Gammaproteobacteria	Pseudomonadales	Pseudomonadaceae	Pseudomonas	Pseudomonas sp. K1S02-6	A0A418XJK9	Pseudomonas sp. K1S02-6.	264	2320866
ABC transporter substrate-binding protein	Bacteria	Proteobacteria	Gammaproteobacteria	Pseudomonadales	Pseudomonadaceae	Pseudomonas	Pseudomonas sp. K1S02-6	A0A418XJB4	Pseudomonas sp. K1S02-6.	260	2320866
ABC transporter substrate-binding protein	Bacteria	Proteobacteria	Gammaproteobacteria	Pseudomonadales	Pseudomonadaceae	Pseudomonas	Pseudomonas saudiphocaensis	A0A3R8VPB5	Pseudomonas saudiphocaensis.	260	1499686
Uncharacterized protein	Bacteria	Proteobacteria	Gammaproteobacteria	Pseudomonadales	Pseudomonadaceae	Pseudomonas	Pseudomonas sp. QZS01	A0A3Q9JK94	Pseudomonas sp. QZS01.	303	2213226	y
Lipoprotein	Bacteria	Proteobacteria	Gammaproteobacteria	Pseudomonadales	Pseudomonadaceae	Pseudomonas	Pseudomonas azotoformans	A0A3M5MTA1	Pseudomonas azotoformans.	271	47878
Lipoprotein| NLPA family	Bacteria	Proteobacteria	Gammaproteobacteria	Pseudomonadales	Pseudomonadaceae	Pseudomonas	Pseudomonas cichorii	A0A3M4VT47	Pseudomonas cichorii.	260	36746
[truncated: 826 more rows]
